# Supplementary material for: Genome-wide mapping of nucleosome positioning and DNA methylation within individual DNA molecules
Source: HighWire-hosted journal article supplement (doi:10.1101/gr.143008.112), 2012-09-07
Supplement: SuppMaterial_FigLegends.docx [file SuppMaterial_FigLegends.docx]

Supplemental Material

**M.CviPI footprinting condition optimization**

To ensure reliable and proper nucleosome footprinting, we performed methyltransferase treatment on IMR90 cells using a variety of conditions and multiple replicates- examples of which are shown in Figure 1B and in Supplemental Figure 1A. *M.SssI* treatment of nuclei (resulting in methylation of CpG sites) was used as a positive control to show faithful nucleosome footprinting using M.CviPI. Since the *LAMB3* promoter is endogenously methylated, *M.SssI* could not be used for footprinting. Optimal footprinting was obtained using 200+100U of the enzyme as described in methods and we further show that a longer incubation period (3hrs) prevented the detection of the nucleosome between the 2 TSSs of the *MLH1* promoter. Based on these data we concluded that 200+100 U provided the best footprinting of nucleosome depleted regions without causing accessibility to nucleosome occupied regions.

**Spurious CCG methylation**

To investigate the “bump” in DNA methylation just upstream of the TSS of promoters marked by H3K4me3 further, we examined whether there was a specific sequence context, other than GpC, in which non-endogenous methylation occurred, and found that all such “off-target” activity of the enzyme affected cytosines that were preceded by another cytosine (Supplemental Figure 8A). We examined all trinucleotide contexts and found that CCG trinucleotides completely accounted for the “bump” (which fell within the most *M.CviPI*-accessible regions), and that it was not present in whole-genome bisulfite-sequencing libraries generated from cells not treated with *M.CviPI* (Supplemental Figure 8B-C). These results indicate that the *M.CviPI* methyltransferase methylates cytosines in CC dinucleotides with about 5% the efficiency as GC dinucleotides. To determine the extent to which this affects analysis, we examined the relative abundance of trinucleotides at different genomic regions. We found that CCG trinucleotides were strongly enriched only at CGI promoters, which account for less than 1% of the genome, and that all trinucleotides were almost equally represented at non-CGI promoters and CTCF sites (Supplemental Fig 8C).

**NOMe-seq maps chromatin configurations at enhancers and transcription factor binding sites**

Nucleosomes occupy DNA regulatory regions thus limiting engagement of DNA binding proteins([Miller and Widom 2003](#_ENREF_9)). We examined nucleosome occupancy at enhancers using the subset of IMR90 DNase hypersensitive sites([Lister et al. 2009](#_ENREF_8)) which overlapped an enhancer element defined by the presence of H3K4 mono-methylation but not tri-methylation([Hawkins et al. 2010](#_ENREF_4)) (Supplemental Figure 6A). For “enhancers” in GBM cells, we used the Class I enhancers in human neural progenitor cells([Rada-Iglesias et al. 2011](#_ENREF_11)), defined as high p300, H3K4me1 and H3K27ac, and low, if any H3K4me3 (Supplemental Figure 7A,B)(Supplemental table 9). Consistent with many previous studies we found that these enhancers were relatively unmethylated and nucleosome depleted([Jin et al. 2009](#_ENREF_7); [He et al. 2010](#_ENREF_5); [Ernst et al. 2011](#_ENREF_3); [Ong and Corces 2011](#_ENREF_10); [Rada-Iglesias et al. 2011](#_ENREF_11)). There have also been some conflicting reports([Tillo et al. 2010](#_ENREF_17)), suggesting that transcription factor binding sites could have increased nucleosome occupancy, however additional studies of NRSF suggest that NRSF sites are found to be strongly nucleosomes occupied in vitro but nucleosome depleted in vivo in human cells([Valouev et al. 2011](#_ENREF_18)).

To examine nucleosome occupancy and DNA methylation at intron/exon boundaries we aligned reads to the start of exons of differing sizes (Supplemental Figure 6B-C) and interestingly, while we did see an overall increase in endogenous CpG methylation that correlated with exonic DNA, we did not detect nucleosome enrichment with exons as has been reported ([Andersson et al. 2009](#_ENREF_1); [Schwartz et al. 2009](#_ENREF_13); [Spies et al. 2009](#_ENREF_15); [Tilgner et al. 2009](#_ENREF_16); [Schwartz and Ast 2010](#_ENREF_12)). One potential explanation for this discrepancy is the significantly higher GC-content present in exons relative to surrounding introns, which make it difficult to control for known MNase biases related to sequence composition. Spies et al. 2008 investigated MNase levels at intronic sequences having the same sequence composition as exons and found MNase enrichment patterns almost identical to true exons. These sequences were later confirmed to be transcriptionally inactive([Schwartz et al. 2011](#_ENREF_14)). Therefore it is possible that nucleosomal enrichment at exons can be at least partially explained by differences in the techniques we have used to map nucleosomes. Indeed, and alternative approach independent from both MNase-seq and NOMe-seq was recently applied to the yeast genome, and no nucleosome enrichment was found at exons([Brogaard et al. 2012](#_ENREF_2)). Additional studies using a variety of nucleosomal mapping techniques are necessary to conclusively resolve in vivo nucleosome positioning at exons.

**Nucleosome Depleted Regions are enriched at promoters marked with H3K4me3 but not H3K27me3**

To further demonstrate the specificity of detecting NDRs, we compared the similarity of the two GBM samples with respect to histone marks in neural progenitor cells (NPCs). After imposing a coverage cutoff that eliminated promoters with low coverage in one or both of the two samples (Supplemental Table 5,6), each GBM sample had approximately 80% of NDRs coinciding with H3K4me3 (Supplemental Figure 7D), a 2.25x enrichment over the expected 35% with a statistical p-value of less than 10-3000. Together, the two GBMs accounted for all but 18% of genes marked by H3K4me3 in NPCs. In contrast, 79% of H3K27me3 marked promoters did *not* coincide with an NDR in either GBM sample. This 2.5x *depletion* of the K27me3 mark in NDRs had a p-value of 10-57. The ATM promoter is marked by H3K4me3 promoter and has a predicted NDR in both samples (FDR-corrected p-value of 1.6x10-20 in NS-157 and 2.6x10-37 in NS-248) and is shown in Figure 2A.

**Source code availability**

The source code used relies on the Java-based GATK package, which can be downloaded here: <http://github.com/broadgsa/gatk>. Each analysis uses a custom “walker”. Walkers are available from our Sourceforge code repository (<http://sourceforge.net/projects/uecgatk/>). Below we show an example command line used to generate one of the various analyses, and the location of the relevant walker in Sourceforge.

*Genomic element alignment (Figures 2,3, Supplemental Figures 3,6,7)*:

java -Xmx19495m org.broadinstitute.sting.gatk.CommandLineGATK -T GnomeSeqFeatureAlignment -R hg19_rCRSchrm.fa -I NOMe.bam --min_mapping_quality_score 30 --minCT 3 –cph –intervals TSS_plus200bp.bed --elementGff TSS.gtf --windSize 2000 -et NO_ET -nt 1 --downscaleCols 200 --outPrefix alignmentout --minContextFracReadsMatching 0.899 -pats HCG -pats GCH

*Within-read combination counts (Figure 5)*:

java -Xmx19495m org.broadinstitute.sting.gatk.CommandLineGATK –T GnomeSeqAutocorrByRead -R hg19_rCRSchrm.fa -I NOMe.bam --min_mapping_quality_score 30 –cph --intervals TSS_plus200bp.bed --elementGff TSS.gff --windSize 20 --featWindSize 2000 -et NO_ET -nt 1 –downscaleCols 1000 --outPrefix alignmentout

*Combinatorial chromatin epigenomic alignment plots (Figure 5)*:

java -Xmx3995m org.broadinstitute.sting.gatk.CommandLineGATK –T FractionByContextCytosineRead -R hg19_rCRSchrm.fa -I NOMe.bam --min_mapping_quality_score 30 --intervals tss_plus200bp.bed

-et NO_ET -nt 1 -o binnedreadout --minConv 1

**Supplemental Figure 1: Optimization and reproducibility of M.CviPI accessibility**. (A)High resolution NOMe-seq was performed at different enzyme concentrations to footprint various types of promoter regions. *M.SssI* based footprinting is included as a control. The data presented here are biological replicates of that presented in Figure 1. In IMR90 cells, *MLH1* and *GRP78* are both active promoters and have open chromatin structures. With 15 minutes incubation time, 200U of the enzyme is sufficient to accurately footprint MLH1, but not *GRP78*. A 3-hour-incubation time with the same amount of enzyme does not change or improve the footprinting in these two regions. By incubating nuclei with 200U of enzyme for 7.5 minutes and a boost of 100U for an additional 7.5 minutes of incubation, we show that we are able to accurately footprint both *MLH1* and *GRP78* promoters. A repressed promoter, *MYOD1*’s footprinting shows that the higher enzyme concentration does not result in aberrant accessibility. We are also able to show the closed chromatin structure of *LAMB3* using NOMe-seq, which is impossible to do using *M.SssI* because *LAMB3* is endogenously methylated in IMR90 cells. (B) Frequency of GCH location within specific distances to GCG trinucleotides that are excluded in analyses. 47% of GCG trinucleotides have a GCH within 5 base pairs or less mitigating the impact of excluding GCGs from analyses. *M.CviPI* inaccessible regions greater than 146 base pairs are covered by a pink rectangle indicating nucleosome occupancy.

**Supplemental Figure 2: Visualization of NOMe-seq data on IGV genome browser.** Zoomed in views of NOMe-seq track on IGV browser, showing two GBM samples, labeled 157 and 248. As in figure 2,the top two tracks show individual sequencing reads with endogenous DNA methylation (at HCG sites) colored as red (methylated) or blue (unmethylated). Tracks 3 and 4 show average methylation levels derived from these tracks – at each individual HCG, the number of reads methylated at that HCG is divided by the total number of reads methylated and unmethylated. Tracks 5 and 6 show the same GBM reads, now colored to indicate GCH methylation. Average GCH methylation is calculated as before, but inverted (1-GCH) in tracks 7 and 8 to indicate nucleosome protection as used throughout the main figures. The ATM promoter is unmethylated (blue in top two tracks) and nucleosome depleted (i.e. accessible and therefore methylated and thus red in tracks 5 and 6). The same methylation and nucleosome occupancy pattern is seen for both GBM samples. The tool and source code are publicly available for download at the IGV project website, <http://www.broadinstitute.org/igv/>.

**Supplemental Figure 3: MNase vs. NOMe-seq for CD4+ T-cells (Schones et al., 2008) and IMR90 cells (current study).** In each panel, NOMe-seq data for IMR90 cells is shown in teal (1-GpC methylation). MNase data is shown for CD4+ cells (A-B) and IMR90 cells (C-D). Left panels (A,C) show the relative enrichment if MNase tags with single-end tags extended by 73 bp (half a mono-nucleosome) in the appropriate direction relative to strand. Right panels (B,D) show raw MNase read densities, with forward strand reads shown in dark blue and reverse strand reads shown in light blue. Panel A is also shown as Figure 2B.

**Supplemental Figure 4: *M.CviPI* protection due to CTCF binding.** High resolution NOMe-seq of region containing the insulator CTCF, whose binding site is depicted by the red box. The binding site is completely protected from the enzyme, whereas the surrounding linker region, as predicted, is highly accessible. This distinct protection pattern on the binding site is much smaller in width compared to the protection from the well-positioned nucleosomes adjacent to the NDRs that flank the binding site.

**Supplemental Figure 5: DNA methylation and nucleosome occupancy are anti-correlated surrounding CTCF sites.** (A) Heatmap on left indicates methylation (accessibility) of GCH sites in green and nucleosome occupancy in white. Heatmap on right indicates endogenous DNA methylation of CGH sites in black and unmethylated CpG sites in white. 6,740 IMR90-bound CTCF motifs that contained at least 2 GCH data points (also used in figure 3A) were sorted based on average methylation from –100 to +100 relative to the motif. Average methylation was smoothed within 20bp windows, as in Figures 2-3. Each row represents a moving average of 50 CTCF sites, showing a continuous trend from highest nucleosome accessibility signal (top) to lowest (bottom).

**Supplemental Figure 6: NOMe-seq footprints nucleosome positioning patterns at chromatin regulatory regions.** (A) NOMe-seq reveals that enhancers marked by H3K4me1 in IMR90 cells are characterized by nucleosome depletion and a lack of methylation. Reads were aligned to the peak of DNase hypersensitivity (“0”) within regions annotated with the H3K4me1/3 enhancer signature([Heintzman et al. 2009](#_ENREF_6)), and were at least 2 kb away from a known TSS. (B-C) NOMe-seq reads were aligned to exons of different size ranges and averaged. Ranges were chosen to represent exons that could cover one nucleosome (100-150bp) or 2 nucleosomes (315-350bp). 0 indicates the start of the exonic region. Data is plotted as *M.CviPI* inaccessibility (1-GCH, teal line) and DNA methylation (CGH, black line).

**Supplemental Figure 7: NOMe-seq analysis of brain tumor derived cell cultures.** NOMe-seq results from primary cultures derived from 2 GBMs (157 in (A) and 248 in (B)) show similar results as what was presented for IMR90 cells in Figure 3: CpG Island promoters are unmethylated and contain an NDR upstream and well-positioned nucleosomes after the TSS while non-CpG island promoters methylated and nucleosome occupied. Enhancers, defined by H3K4me1, H3K27Ac and p300 in NPCs([Rada-Iglesias et al. 2011](#_ENREF_11))(Supplemental Table 8) are unmethylated and nucleosome depleted. The Y-axis indicates M.CviPI inaccessibility (1-CpG; teal) and CpG Methylation level. (C) NDRs are more commonly shared across cell types of CGI promoters compared to non-CGI promoters. Using a statistical test to identify NDRs near TSSs), we were able to identify over 10,000 promoter NDRs in each GBM sample with a False Discovery Rate of p<0.01 (Supplemental Table 5,6). In order to compare these two samples directly with IMR90, we used a more limited set of 12,424 promoters that had sufficient sequencing coverage in IMR90 (Methods, Supplemental Table 5-7). Venn diagrams indicate the extent of overlap between predicted NDRs in the 2 GBM samples (green and blue) and IMR90 cells (red) at both CGI promoters and non-CGI promoters. The number of NDRs (see methods) in each overlapping category is indicated. (D) As expected, NDR predictions based on NOMe-seq preferentially identify H3K4me3 promoters (purple) over H3K27me3 (pink) marked promoters. The number of NDRs in each overlapping category is indicated.

**Supplemental Figure 8: Non-specific activity of *M.CviPI* at CpC dinucleotides**. In order to identify non-GpC activity, we collected all sequences from -150 to +100 of gene promoters, where the highest M.CviPI accessibility at GpC is located. We then examined cytosines within these regions, excluding those preceded by G, and those followed by G or A (which may have some level of endogenous methylation). We selected the subset of these HCY trinucleotides which were methylated on at least 3 independent reads, and aligned the flanking sequences to yield a sequence logo plot (A). The sequence logo shows that almost all such methylated cytosines are preceded by a cytosine (CpC). (B) Shows methylation levels of NCH cytosines (top) and NCG cytosines (bottom). In standard bisulfite-seq from Lister et al. 2009([Lister et al. 2009](#_ENREF_8)), all contexts have similar levels. In NOMe-seq, CCH has about 6% of reads methylated at the TSS where M.CviPI has the greatest accessibility, while ACH and TCH have about 1% (bisulfite non-conversion). The right panel shows plots similar to Figure 3, with CCG included (top) and CCG excluded (bottom), showing the bump at the TSS is a result of CCG off-target methylation. (C) Trinucleotide counts around several genomic elements show that excluding CCG (i.e. using WCG) considerably reduces coverage at CpG Island TSS, but not other TSS or protein binding sites such as CTCF or E2F.

**Supplemental Figure 9: Overlap between DCA regions across 3 cell types.** We performed Divergent Chromatin Allele (DCA) identification on 3 cell types, as described in Methods. We compared all TSS (transcription start site) regions that were covered by at least 2 (left) or 5 (right) qualifying sequence read in each cell type. In order to qualify, a sequencing read had to have at least 2 HCG dincleotides and 2 GCH dinucleotides, and the methylation state across each of the two classes of dinucleotides had to be at least 90% concordant (see Methods). The number of qualifying TSSs is shown in parentheses. All pairwise overlaps were very highly statistically significant using the Hypergeometric statistical test (as indicated by p-value), with a higher degree of overlap between the two GBM cell types (NS-157 and NS-248).

References

Andersson R, Enroth S, Rada-Iglesias A, Wadelius C, Komorowski J. 2009. Nucleosomes are well positioned in exons and carry characteristic histone modifications. *Genome Res* **19**(10): 1732-1741.

Brogaard K, Xi L, Wang JP, Widom J. 2012. A map of nucleosome positions in yeast at base-pair resolution. *Nature* **486**(7404): 496-501.

Ernst J, Kheradpour P, Mikkelsen TS, Shoresh N, Ward LD, Epstein CB, Zhang X, Wang L, Issner R, Coyne M et al. 2011. Mapping and analysis of chromatin state dynamics in nine human cell types. *Nature* **473**(7345): 43-49.

Hawkins RD, Hon GC, Lee LK, Ngo Q, Lister R, Pelizzola M, Edsall LE, Kuan S, Luu Y, Klugman S et al. 2010. Distinct epigenomic landscapes of pluripotent and lineage-committed human cells. *Cell Stem Cell* **6**(5): 479-491.

He HH, Meyer CA, Shin H, Bailey ST, Wei G, Wang Q, Zhang Y, Xu K, Ni M, Lupien M et al. 2010. Nucleosome dynamics define transcriptional enhancers. *Nat Genet* **42**(4): 343-347.

Heintzman ND, Hon GC, Hawkins RD, Kheradpour P, Stark A, Harp LF, Ye Z, Lee LK, Stuart RK, Ching CW et al. 2009. Histone modifications at human enhancers reflect global cell-type-specific gene expression. *Nature* **459**(7243): 108-112.

Jin C, Zang C, Wei G, Cui K, Peng W, Zhao K, Felsenfeld G. 2009. H3.3/H2A.Z double variant-containing nucleosomes mark 'nucleosome-free regions' of active promoters and other regulatory regions. *Nat Genet* **41**(8): 941-945.

Lister R, Pelizzola M, Dowen RH, Hawkins RD, Hon G, Tonti-Filippini J, Nery JR, Lee L, Ye Z, Ngo QM et al. 2009. Human DNA methylomes at base resolution show widespread epigenomic differences. *Nature* **462**(7271): 315-322.

Miller JA, Widom J. 2003. Collaborative competition mechanism for gene activation in vivo. *Molecular and cellular biology* **23**(5): 1623-1632.

Ong CT, Corces VG. 2011. Enhancer function: new insights into the regulation of tissue-specific gene expression. *Nat Rev Genet* **12**(4): 283-293.

Rada-Iglesias A, Bajpai R, Swigut T, Brugmann SA, Flynn RA, Wysocka J. 2011. A unique chromatin signature uncovers early developmental enhancers in humans. *Nature* **470**(7333): 279-283.

Schwartz S, Ast G. 2010. Chromatin density and splicing destiny: on the cross-talk between chromatin structure and splicing. *Embo J* **29**(10): 1629-1636.

Schwartz S, Meshorer E, Ast G. 2009. Chromatin organization marks exon-intron structure. *Nat Struct Mol Biol* **16**(9): 990-995.

Schwartz S, Oren R, Ast G. 2011. Detection and removal of biases in the analysis of next-generation sequencing reads. *PLoS One* **6**(1): e16685.

Spies N, Nielsen CB, Padgett RA, Burge CB. 2009. Biased chromatin signatures around polyadenylation sites and exons. *Mol Cell* **36**(2): 245-254.

Tilgner H, Nikolaou C, Althammer S, Sammeth M, Beato M, Valcarcel J, Guigo R. 2009. Nucleosome positioning as a determinant of exon recognition. *Nat Struct Mol Biol* **16**(9): 996-1001.

Tillo D, Kaplan N, Moore IK, Fondufe-Mittendorf Y, Gossett AJ, Field Y, Lieb JD, Widom J, Segal E, Hughes TR. 2010. High nucleosome occupancy is encoded at human regulatory sequences. *PLoS One* **5**(2): e9129.

Valouev A, Johnson SM, Boyd SD, Smith CL, Fire AZ, Sidow A. 2011. Determinants of nucleosome organization in primary human cells. *Nature* **474**(7352): 516-520.
