# Supplementary material for: Genome-wide mapping of nucleosome positioning and DNA methylation within individual DNA molecules
Source: HighWire-hosted journal article supplement (doi:10.1101/gr.143008.112), 2012-09-07
Supplement: SuppTables.xlsx [file SuppTables.xlsx]

## Sheet: SuppTable1- cytosineTrinucFreqs
trinuc	number	number	% of genome	% of genome
	(strands combined)	(both strands)	(strand-specific)	(total)
GCH	116126861	232253722	0.0373677	0.0747355		1 GCH per	26.7611	bp
GCA	4.15062e+07	83012357	0.013356	0.026712
GCT	40297183	80594366	0.012967	0.025934
GCC	3.43235e+07	68646999	0.0110447	0.0220895
						% of GC	% of CG
GCG	6880152	13760304	0.00221392	0.00442784		0.055933	0.241535
HCG	21605012	43210024	0.00695214	0.0139043
CCG	7980645	15961290	0.00256804	0.00513608
ACG	7252385	14504770	0.0023337	0.0046674
TCG	6371982	12743964	0.0020504	0.0041008
Total GCs	123007013	246014026
Total CGs	28485164	56970328

## Sheet: SuppTable2- CTCF binding sites
All	chr1	XieEtAlCTCF	exon	1307604	1307622	0.8988	-	.
Coordinates	chr1	XieEtAlCTCF	exon	2105895	2105913	0.9775	-	.
hg19	chr1	XieEtAlCTCF	exon	2313354	2313372	0.9432	-	.
	chr1	XieEtAlCTCF	exon	2361669	2361688	0.8811	+	.
	chr1	XieEtAlCTCF	exon	2738726	2738745	0.8335	+	.
CTCF binding	chr1	XieEtAlCTCF	exon	2838769	2838787	0.8605	-	.
sites. Those	chr1	XieEtAlCTCF	exon	3236689	3236707	0.867	-	.
within 2kb	chr1	XieEtAlCTCF	exon	3341433	3341451	0.8619	.	.
of annotated	chr1	XieEtAlCTCF	exon	3407953	3407971	0.8998	+	.
TSS excluded	chr1	XieEtAlCTCF	exon	3641147	3641165	0.8924	-	.
	chr1	XieEtAlCTCF	exon	4712805	4712823	0.9018	+	.
Data from	chr1	XieEtAlCTCF	exon	5806032	5806050	0.9374	-	.
Xie et al	chr1	XieEtAlCTCF	exon	5976224	5976242	0.8933	-	.
Pubmed ID	chr1	XieEtAlCTCF	exon	6101685	6101704	0.9192	.	.
17442748	chr1	XieEtAlCTCF	exon	6113156	6113174	0.8964	+	.
	chr1	XieEtAlCTCF	exon	6246030	6246049	0.9216	-	.
	chr1	XieEtAlCTCF	exon	6306947	6306965	0.9175	+	.
	chr1	XieEtAlCTCF	exon	6403663	6403682	0.8287	.	.
	chr1	XieEtAlCTCF	exon	6408167	6408186	0.9059	.	.
	chr1	XieEtAlCTCF	exon	6474544	6474562	0.8542	-	.
	chr1	XieEtAlCTCF	exon	6498252	6498270	0.8197	-	.
	chr1	XieEtAlCTCF	exon	6535733	6535751	0.9115	-	.
	chr1	XieEtAlCTCF	exon	6583856	6583874	0.8422	.	.
	chr1	XieEtAlCTCF	exon	6706748	6706767	0.8724	-	.
	chr1	XieEtAlCTCF	exon	6780225	6780243	0.9248	+	.
	chr1	XieEtAlCTCF	exon	6854393	6854411	0.8574	+	.
	chr1	XieEtAlCTCF	exon	6950120	6950138	0.9562	-	.
	chr1	XieEtAlCTCF	exon	7102954	7102972	0.9354	+	.
	chr1	XieEtAlCTCF	exon	7707465	7707484	0.9789	-	.
	chr1	XieEtAlCTCF	exon	7729700	7729719	0.902	.	.
	chr1	XieEtAlCTCF	exon	7813055	7813073	0.9621	-	.
	chr1	XieEtAlCTCF	exon	7962994	7963012	0.9552	-	.
	chr1	XieEtAlCTCF	exon	8091437	8091456	0.8424	.	.
	chr1	XieEtAlCTCF	exon	8374532	8374550	0.8305	-	.
	chr1	XieEtAlCTCF	exon	8409222	8409240	0.983	-	.
	chr1	XieEtAlCTCF	exon	8786753	8786771	0.8668	-	.
	chr1	XieEtAlCTCF	exon	8909133	8909152	0.825	.	.
	chr1	XieEtAlCTCF	exon	9048276	9048294	0.9124	-	.
	chr1	XieEtAlCTCF	exon	9170987	9171005	0.9392	+	.
	chr1	XieEtAlCTCF	exon	9349239	9349258	0.8841	+	.
	chr1	XieEtAlCTCF	exon	9844777	9844795	0.8591	-	.
	chr1	XieEtAlCTCF	exon	9927707	9927725	0.9495	-	.
	chr1	XieEtAlCTCF	exon	9935097	9935115	0.9152	+	.
	chr1	XieEtAlCTCF	exon	10554876	10554894	0.8917	-	.
	chr1	XieEtAlCTCF	exon	10555279	10555297	0.8941	+	.
	chr1	XieEtAlCTCF	exon	10567665	10567683	0.8581	+	.
	chr1	XieEtAlCTCF	exon	10970149	10970167	0.8636	-	.
	chr1	XieEtAlCTCF	exon	11002189	11002207	0.9022	-	.
	chr1	XieEtAlCTCF	exon	11301931	11301949	0.9358	+	.
	chr1	XieEtAlCTCF	exon	11702656	11702674	0.9272	-	.
	chr1	XieEtAlCTCF	exon	11780017	11780036	0.8848	-	.
	chr1	XieEtAlCTCF	exon	11954170	11954189	0.9458	-	.
	chr1	XieEtAlCTCF	exon	12269084	12269102	0.9271	-	.
	chr1	XieEtAlCTCF	exon	12467664	12467682	0.8892	+	.
	chr1	XieEtAlCTCF	exon	14287061	14287079	0.9354	-	.
	chr1	XieEtAlCTCF	exon	14440511	14440530	0.829	+	.
	chr1	XieEtAlCTCF	exon	15105809	15105827	0.9327	+	.
	chr1	XieEtAlCTCF	exon	15373202	15373220	0.9339	-	.
	chr1	XieEtAlCTCF	exon	15455191	15455209	0.9555	+	.
	chr1	XieEtAlCTCF	exon	15599216	15599235	0.846	.	.
	chr1	XieEtAlCTCF	exon	15631401	15631420	0.9678	-	.
	chr1	XieEtAlCTCF	exon	15650211	15650229	0.9798	+	.
	chr1	XieEtAlCTCF	exon	15757805	15757823	0.9491	-	.
	chr1	XieEtAlCTCF	exon	15828076	15828095	0.8505	.	.
	chr1	XieEtAlCTCF	exon	16118690	16118708	0.9697	+	.
	chr1	XieEtAlCTCF	exon	16142196	16142214	0.9253	+	.
	chr1	XieEtAlCTCF	exon	16335683	16335702	0.8747	+	.
	chr1	XieEtAlCTCF	exon	16405539	16405557	0.9386	+	.
	chr1	XieEtAlCTCF	exon	16408999	16409017	0.9483	+	.
	chr1	XieEtAlCTCF	exon	16514417	16514435	0.929	-	.
	chr1	XieEtAlCTCF	exon	17011434	17011452	0.92	-	.
	chr1	XieEtAlCTCF	exon	17452420	17452438	0.9043	+	.
	chr1	XieEtAlCTCF	exon	17563715	17563733	0.9085	-	.
	chr1	XieEtAlCTCF	exon	17732832	17732850	0.9585	-	.
	chr1	XieEtAlCTCF	exon	17746514	17746533	0.9034	+	.
	chr1	XieEtAlCTCF	exon	17820922	17820941	0.8718	+	.
	chr1	XieEtAlCTCF	exon	17933516	17933535	0.8692	-	.
	chr1	XieEtAlCTCF	exon	18085757	18085776	0.8902	+	.
	chr1	XieEtAlCTCF	exon	18246540	18246558	0.939	+	.
	chr1	XieEtAlCTCF	exon	18427154	18427173	0.8531	-	.
	chr1	XieEtAlCTCF	exon	18629495	18629513	0.9077	-	.
	chr1	XieEtAlCTCF	exon	18902252	18902270	0.9182	-	.
	chr1	XieEtAlCTCF	exon	18924074	18924092	0.9553	+	.
	chr1	XieEtAlCTCF	exon	19008060	19008078	0.9212	-	.
	chr1	XieEtAlCTCF	exon	19147435	19147454	0.9242	.	.
	chr1	XieEtAlCTCF	exon	19233604	19233623	0.8569	+	.
	chr1	XieEtAlCTCF	exon	19422912	19422930	0.8917	-	.
	chr1	XieEtAlCTCF	exon	19717999	19718018	0.9259	+	.
	chr1	XieEtAlCTCF	exon	19908919	19908937	0.9294	-	.
	chr1	XieEtAlCTCF	exon	19980354	19980373	0.8651	-	.
	chr1	XieEtAlCTCF	exon	19988410	19988428	0.9706	+	.
	chr1	XieEtAlCTCF	exon	20244670	20244689	0.8246	+	.
	chr1	XieEtAlCTCF	exon	20479001	20479019	0.8874	-	.
	chr1	XieEtAlCTCF	exon	20539507	20539525	0.9686	+	.
	chr1	XieEtAlCTCF	exon	20688468	20688487	0.9279	+	.
	chr1	XieEtAlCTCF	exon	20820456	20820475	0.8965	.	.
	chr1	XieEtAlCTCF	exon	21023086	21023104	0.8736	+	.
	chr1	XieEtAlCTCF	exon	21695155	21695173	0.9125	-	.
	chr1	XieEtAlCTCF	exon	21697214	21697232	0.9248	+	.
	chr1	XieEtAlCTCF	exon	21922204	21922222	0.9066	-	.
	chr1	XieEtAlCTCF	exon	22432307	22432325	0.9462	+	.
	chr1	XieEtAlCTCF	exon	22458561	22458579	0.8897	.	.
	chr1	XieEtAlCTCF	exon	22743253	22743271	0.8822	.	.
	chr1	XieEtAlCTCF	exon	22747113	22747131	0.8268	+	.
	chr1	XieEtAlCTCF	exon	23031114	23031132	0.9569	+	.
	chr1	XieEtAlCTCF	exon	23303088	23303106	0.9232	.	.
	chr1	XieEtAlCTCF	exon	23425390	23425409	0.8589	+	.
	chr1	XieEtAlCTCF	exon	23511343	23511362	0.9487	-	.
	chr1	XieEtAlCTCF	exon	23543398	23543416	0.9692	+	.
	chr1	XieEtAlCTCF	exon	23823726	23823744	0.9725	+	.
	chr1	XieEtAlCTCF	exon	23866478	23866496	0.9148	-	.
	chr1	XieEtAlCTCF	exon	23871363	23871381	0.8546	.	.
	chr1	XieEtAlCTCF	exon	23964088	23964107	0.9212	-	.
	chr1	XieEtAlCTCF	exon	24243473	24243491	0.819	.	.
	chr1	XieEtAlCTCF	exon	24275812	24275831	0.871	+	.
	chr1	XieEtAlCTCF	exon	24477127	24477145	0.9223	+	.
	chr1	XieEtAlCTCF	exon	24525937	24525955	0.9276	+	.
	chr1	XieEtAlCTCF	exon	24528520	24528539	0.8882	+	.
	chr1	XieEtAlCTCF	exon	24868648	24868667	0.858	.	.
	chr1	XieEtAlCTCF	exon	24913883	24913901	0.8355	-	.
	chr1	XieEtAlCTCF	exon	24961901	24961919	0.8503	-	.
	chr1	XieEtAlCTCF	exon	25015210	25015228	0.8879	+	.
	chr1	XieEtAlCTCF	exon	25157362	25157380	0.9457	-	.
	chr1	XieEtAlCTCF	exon	25174578	25174597	0.8663	+	.
	chr1	XieEtAlCTCF	exon	25224770	25224788	0.8635	-	.
	chr1	XieEtAlCTCF	exon	25363832	25363850	0.8926	+	.
	chr1	XieEtAlCTCF	exon	25364357	25364375	0.8659	-	.
	chr1	XieEtAlCTCF	exon	25428093	25428111	0.8648	-	.
	chr1	XieEtAlCTCF	exon	25531523	25531541	0.9515	-	.
	chr1	XieEtAlCTCF	exon	25616727	25616746	0.8331	-	.
	chr1	XieEtAlCTCF	exon	25729612	25729631	0.8331	+	.
	chr1	XieEtAlCTCF	exon	25935262	25935280	0.87	+	.
	chr1	XieEtAlCTCF	exon	26362618	26362636	0.9374	+	.
	chr1	XieEtAlCTCF	exon	26431620	26431638	0.9327	+	.
	chr1	XieEtAlCTCF	exon	26471778	26471796	0.8971	-	.
	chr1	XieEtAlCTCF	exon	26490854	26490872	0.962	-	.
	chr1	XieEtAlCTCF	exon	26611743	26611762	0.95	+	.
	chr1	XieEtAlCTCF	exon	26648207	26648226	0.8593	-	.
	chr1	XieEtAlCTCF	exon	26718150	26718169	0.8327	-	.
	chr1	XieEtAlCTCF	exon	26743696	26743715	0.9354	-	.
	chr1	XieEtAlCTCF	exon	26826839	26826857	0.8947	.	.
	chr1	XieEtAlCTCF	exon	26865362	26865381	0.8377	+	.
	chr1	XieEtAlCTCF	exon	26929030	26929048	0.9148	+	.
	chr1	XieEtAlCTCF	exon	27004205	27004223	0.9071	+	.
	chr1	XieEtAlCTCF	exon	27204634	27204652	0.9278	-	.
	chr1	XieEtAlCTCF	exon	27324296	27324314	0.9806	+	.
	chr1	XieEtAlCTCF	exon	27371196	27371214	0.9015	+	.
	chr1	XieEtAlCTCF	exon	27372577	27372596	0.9462	+	.
	chr1	XieEtAlCTCF	exon	27424061	27424079	0.962	-	.
	chr1	XieEtAlCTCF	exon	27524590	27524608	0.9318	+	.
	chr1	XieEtAlCTCF	exon	27611338	27611357	0.8518	-	.
	chr1	XieEtAlCTCF	exon	27627458	27627476	0.941	+	.
	chr1	XieEtAlCTCF	exon	27684168	27684187	0.922	+	.
	chr1	XieEtAlCTCF	exon	27715067	27715085	0.9601	-	.
	chr1	XieEtAlCTCF	exon	27722062	27722080	0.9824	-	.
	chr1	XieEtAlCTCF	exon	27729003	27729021	0.9105	+	.
	chr1	XieEtAlCTCF	exon	27743191	27743209	0.8793	+	.
	chr1	XieEtAlCTCF	exon	27933043	27933061	0.9402	-	.
	chr1	XieEtAlCTCF	exon	27989841	27989859	0.9893	-	.
	chr1	XieEtAlCTCF	exon	28535555	28535573	0.9469	-	.
	chr1	XieEtAlCTCF	exon	28575156	28575175	0.8344	.	.
	chr1	XieEtAlCTCF	exon	28686346	28686364	0.9435	+	.
	chr1	XieEtAlCTCF	exon	28736428	28736446	0.92	+	.
	chr1	XieEtAlCTCF	exon	28929528	28929546	0.9263	-	.
	chr1	XieEtAlCTCF	exon	29111777	29111795	0.9444	+	.
	chr1	XieEtAlCTCF	exon	29203873	29203891	0.9275	-	.
	chr1	XieEtAlCTCF	exon	29208725	29208743	0.8891	+	.
	chr1	XieEtAlCTCF	exon	29360544	29360563	0.8854	.	.
	chr1	XieEtAlCTCF	exon	29529550	29529568	0.9179	-	.
	chr1	XieEtAlCTCF	exon	29658894	29658913	0.8433	+	.
	chr1	XieEtAlCTCF	exon	30558963	30558982	0.8761	.	.
	chr1	XieEtAlCTCF	exon	30853408	30853426	0.9351	-	.
	chr1	XieEtAlCTCF	exon	31181129	31181147	0.9448	-	.
	chr1	XieEtAlCTCF	exon	31252609	31252628	0.9255	-	.
	chr1	XieEtAlCTCF	exon	31255338	31255357	0.8938	+	.
	chr1	XieEtAlCTCF	exon	31274746	31274765	0.8758	+	.
	chr1	XieEtAlCTCF	exon	31384385	31384404	0.886	-	.
	chr1	XieEtAlCTCF	exon	31402424	31402442	0.8213	.	.
	chr1	XieEtAlCTCF	exon	31656988	31657006	0.9113	+	.
	chr1	XieEtAlCTCF	exon	31867648	31867666	0.9306	+	.
	chr1	XieEtAlCTCF	exon	31895754	31895773	0.8962	-	.
	chr1	XieEtAlCTCF	exon	32029831	32029849	0.8909	+	.
	chr1	XieEtAlCTCF	exon	32129612	32129630	0.8627	+	.
	chr1	XieEtAlCTCF	exon	32254971	32254990	0.8221	-	.
	chr1	XieEtAlCTCF	exon	32429873	32429891	0.9341	-	.
	chr1	XieEtAlCTCF	exon	32681393	32681411	0.8828	+	.
	chr1	XieEtAlCTCF	exon	32866601	32866620	0.9365	.	.
	chr1	XieEtAlCTCF	exon	33238772	33238791	0.9057	-	.
	chr1	XieEtAlCTCF	exon	33342416	33342434	0.9007	+	.
	chr1	XieEtAlCTCF	exon	33399191	33399210	0.841	.	.
	chr1	XieEtAlCTCF	exon	33520906	33520924	0.914	-	.
	chr1	XieEtAlCTCF	exon	33552131	33552149	0.9345	-	.
	chr1	XieEtAlCTCF	exon	33684458	33684476	0.9054	+	.
	chr1	XieEtAlCTCF	exon	33761258	33761276	0.9112	+	.
	chr1	XieEtAlCTCF	exon	33833541	33833559	0.9135	-	.
	chr1	XieEtAlCTCF	exon	35208449	35208467	0.8913	.	.
	chr1	XieEtAlCTCF	exon	35318496	35318514	0.8917	+	.
	chr1	XieEtAlCTCF	exon	35332117	35332136	0.8945	-	.
	chr1	XieEtAlCTCF	exon	35667877	35667895	0.8158	+	.
	chr1	XieEtAlCTCF	exon	35916837	35916856	0.8822	+	.
	chr1	XieEtAlCTCF	exon	36030413	36030432	0.8528	-	.
	chr1	XieEtAlCTCF	exon	36034705	36034723	0.8859	+	.
	chr1	XieEtAlCTCF	exon	36192620	36192638	0.9705	-	.
	chr1	XieEtAlCTCF	exon	36600499	36600517	0.9081	-	.
	chr1	XieEtAlCTCF	exon	36653934	36653953	0.8818	-	.
	chr1	XieEtAlCTCF	exon	36751237	36751255	0.9409	-	.
	chr1	XieEtAlCTCF	exon	36886588	36886606	0.9212	-	.
	chr1	XieEtAlCTCF	exon	36912110	36912129	0.8613	+	.
	chr1	XieEtAlCTCF	exon	36982124	36982143	0.9522	+	.
	chr1	XieEtAlCTCF	exon	37019602	37019620	0.9159	+	.
	chr1	XieEtAlCTCF	exon	37041841	37041859	0.9559	+	.
	chr1	XieEtAlCTCF	exon	37075034	37075052	0.9156	+	.
	chr1	XieEtAlCTCF	exon	37169476	37169494	0.9348	+	.
	chr1	XieEtAlCTCF	exon	37643045	37643063	0.9268	-	.
	chr1	XieEtAlCTCF	exon	37789557	37789575	0.9486	-	.
	chr1	XieEtAlCTCF	exon	37900065	37900083	0.9479	-	.
	chr1	XieEtAlCTCF	exon	38027563	38027581	0.916	+	.
	chr1	XieEtAlCTCF	exon	38068904	38068923	0.8954	+	.
	chr1	XieEtAlCTCF	exon	38356234	38356253	0.8536	+	.
	chr1	XieEtAlCTCF	exon	38440872	38440890	0.9181	-	.
	chr1	XieEtAlCTCF	exon	38492464	38492483	0.9072	+	.
	chr1	XieEtAlCTCF	exon	38506345	38506363	0.9117	+	.
	chr1	XieEtAlCTCF	exon	39283998	39284016	0.9499	-	.
	chr1	XieEtAlCTCF	exon	39301090	39301108	0.9545	-	.
	chr1	XieEtAlCTCF	exon	39658346	39658364	0.9066	+	.
	chr1	XieEtAlCTCF	exon	39724499	39724518	0.8444	-	.
	chr1	XieEtAlCTCF	exon	39732097	39732115	0.8658	+	.
	chr1	XieEtAlCTCF	exon	39876759	39876778	0.8276	.	.
	chr1	XieEtAlCTCF	exon	40072026	40072044	0.9902	+	.
	chr1	XieEtAlCTCF	exon	40119374	40119392	0.9413	-	.
	chr1	XieEtAlCTCF	exon	40123881	40123899	0.9356	-	.
	chr1	XieEtAlCTCF	exon	40167703	40167722	0.9131	+	.
	chr1	XieEtAlCTCF	exon	40185866	40185884	0.9223	-	.
	chr1	XieEtAlCTCF	exon	40265504	40265522	0.9337	-	.
	chr1	XieEtAlCTCF	exon	40282652	40282670	0.9478	+	.
	chr1	XieEtAlCTCF	exon	40385343	40385361	0.8615	+	.
	chr1	XieEtAlCTCF	exon	40439354	40439373	0.889	-	.
	chr1	XieEtAlCTCF	exon	40498136	40498154	0.9479	-	.
	chr1	XieEtAlCTCF	exon	40609849	40609867	0.9068	+	.
	chr1	XieEtAlCTCF	exon	40804551	40804569	0.8645	-	.
	chr1	XieEtAlCTCF	exon	40870686	40870705	0.9792	.	.
	chr1	XieEtAlCTCF	exon	41078119	41078138	0.9052	+	.
	chr1	XieEtAlCTCF	exon	41240028	41240046	0.9551	+	.
	chr1	XieEtAlCTCF	exon	41314383	41314401	0.9046	+	.
	chr1	XieEtAlCTCF	exon	41418332	41418351	0.8926	-	.
	chr1	XieEtAlCTCF	exon	41588945	41588963	0.9064	-	.
	chr1	XieEtAlCTCF	exon	41734015	41734034	0.8716	+	.
	chr1	XieEtAlCTCF	exon	41748542	41748561	0.8551	.	.
	chr1	XieEtAlCTCF	exon	41788728	41788747	0.8358	+	.
	chr1	XieEtAlCTCF	exon	41882930	41882948	0.9541	-	.
	chr1	XieEtAlCTCF	exon	41898565	41898584	0.9499	-	.
	chr1	XieEtAlCTCF	exon	41981932	41981951	0.8364	.	.
	chr1	XieEtAlCTCF	exon	42612702	42612720	0.8988	+	.
	chr1	XieEtAlCTCF	exon	42639170	42639188	0.9284	-	.
	chr1	XieEtAlCTCF	exon	43043760	43043778	0.9212	+	.
	chr1	XieEtAlCTCF	exon	43222821	43222839	0.8992	-	.
	chr1	XieEtAlCTCF	exon	43388781	43388799	0.9176	+	.
	chr1	XieEtAlCTCF	exon	43693105	43693123	0.9888	+	.
	chr1	XieEtAlCTCF	exon	43703940	43703959	0.8447	.	.
	chr1	XieEtAlCTCF	exon	44229285	44229303	0.9256	+	.
	chr1	XieEtAlCTCF	exon	44471494	44471512	0.9111	+	.
	chr1	XieEtAlCTCF	exon	44502416	44502434	0.9316	-	.
	chr1	XieEtAlCTCF	exon	44513531	44513549	0.9234	-	.
	chr1	XieEtAlCTCF	exon	44683568	44683586	0.9418	+	.
	chr1	XieEtAlCTCF	exon	44760567	44760585	0.8602	-	.
	chr1	XieEtAlCTCF	exon	44784094	44784112	0.8996	-	.
	chr1	XieEtAlCTCF	exon	44844046	44844064	0.9438	+	.
	chr1	XieEtAlCTCF	exon	45037921	45037939	0.9253	+	.
	chr1	XieEtAlCTCF	exon	45060979	45060998	0.9242	-	.
	chr1	XieEtAlCTCF	exon	45118708	45118726	0.954	-	.
	chr1	XieEtAlCTCF	exon	45121394	45121412	0.9059	+	.
	chr1	XieEtAlCTCF	exon	45173735	45173753	0.8712	+	.
	chr1	XieEtAlCTCF	exon	45180818	45180836	0.9288	+	.
	chr1	XieEtAlCTCF	exon	45197128	45197146	0.9255	+	.
	chr1	XieEtAlCTCF	exon	45825632	45825650	0.8918	+	.
	chr1	XieEtAlCTCF	exon	45958975	45958993	0.9321	-	.
	chr1	XieEtAlCTCF	exon	45978436	45978454	0.9183	+	.
	chr1	XieEtAlCTCF	exon	46035906	46035924	0.9274	-	.
	chr1	XieEtAlCTCF	exon	46689311	46689329	0.9141	-	.
	chr1	XieEtAlCTCF	exon	46912689	46912707	0.9276	+	.
	chr1	XieEtAlCTCF	exon	46943263	46943282	0.8175	+	.
	chr1	XieEtAlCTCF	exon	46993871	46993889	0.9518	-	.
	chr1	XieEtAlCTCF	exon	47191091	47191109	0.9421	-	.
	chr1	XieEtAlCTCF	exon	47213550	47213568	0.9073	+	.
	chr1	XieEtAlCTCF	exon	47639683	47639701	0.9372	-	.
	chr1	XieEtAlCTCF	exon	47644981	47644999	0.9614	+	.
	chr1	XieEtAlCTCF	exon	47658736	47658754	0.9528	+	.
	chr1	XieEtAlCTCF	exon	47890215	47890234	0.8883	-	.
	chr1	XieEtAlCTCF	exon	47898225	47898244	0.8319	.	.
	chr1	XieEtAlCTCF	exon	48192107	48192125	0.9667	-	.
	chr1	XieEtAlCTCF	exon	48204443	48204462	0.8746	.	.
	chr1	XieEtAlCTCF	exon	48221274	48221292	0.9658	-	.
	chr1	XieEtAlCTCF	exon	48527033	48527051	0.8605	-	.
	chr1	XieEtAlCTCF	exon	48575255	48575273	0.9276	+	.
	chr1	XieEtAlCTCF	exon	48964345	48964364	0.8204	+	.
	chr1	XieEtAlCTCF	exon	48996585	48996604	0.8639	-	.
	chr1	XieEtAlCTCF	exon	49038502	49038520	0.8885	+	.
	chr1	XieEtAlCTCF	exon	49162952	49162970	0.9562	-	.
	chr1	XieEtAlCTCF	exon	49336462	49336481	0.8824	.	.
	chr1	XieEtAlCTCF	exon	50546763	50546781	0.9239	-	.
	chr1	XieEtAlCTCF	exon	50798838	50798857	0.8694	.	.
	chr1	XieEtAlCTCF	exon	50799407	50799425	0.9349	-	.
	chr1	XieEtAlCTCF	exon	50814551	50814569	0.9634	-	.
	chr1	XieEtAlCTCF	exon	50834295	50834313	0.8999	+	.
	chr1	XieEtAlCTCF	exon	51169896	51169914	0.911	-	.
	chr1	XieEtAlCTCF	exon	51201228	51201247	0.8547	.	.
	chr1	XieEtAlCTCF	exon	51240621	51240639	0.9271	+	.
	chr1	XieEtAlCTCF	exon	51395239	51395257	0.8172	+	.
	chr1	XieEtAlCTCF	exon	52000855	52000873	0.9094	-	.
	chr1	XieEtAlCTCF	exon	52593283	52593301	0.9183	+	.
	chr1	XieEtAlCTCF	exon	53647859	53647878	0.8419	.	.
	chr1	XieEtAlCTCF	exon	53859162	53859180	0.9114	-	.
	chr1	XieEtAlCTCF	exon	53916111	53916130	0.9094	+	.
	chr1	XieEtAlCTCF	exon	54220553	54220571	0.9316	-	.
	chr1	XieEtAlCTCF	exon	54326733	54326751	0.9276	+	.
	chr1	XieEtAlCTCF	exon	54414883	54414901	0.906	-	.
	chr1	XieEtAlCTCF	exon	54535909	54535927	0.8946	+	.
	chr1	XieEtAlCTCF	exon	54535958	54535976	0.8682	+	.
	chr1	XieEtAlCTCF	exon	54587402	54587420	0.9163	+	.
	chr1	XieEtAlCTCF	exon	54776832	54776850	0.9049	+	.
	chr1	XieEtAlCTCF	exon	54955241	54955259	0.9302	-	.
	chr1	XieEtAlCTCF	exon	55137873	55137891	0.9171	+	.
	chr1	XieEtAlCTCF	exon	55257755	55257774	0.9032	.	.
	chr1	XieEtAlCTCF	exon	55410943	55410961	0.9585	+	.
	chr1	XieEtAlCTCF	exon	55416511	55416529	0.873	+	.
	chr1	XieEtAlCTCF	exon	55606382	55606400	0.9163	+	.
	chr1	XieEtAlCTCF	exon	55743386	55743404	0.9608	-	.
	chr1	XieEtAlCTCF	exon	57050769	57050787	0.9134	-	.
	chr1	XieEtAlCTCF	exon	57175141	57175159	0.9444	-	.
	chr1	XieEtAlCTCF	exon	57297732	57297751	0.8836	+	.
	chr1	XieEtAlCTCF	exon	57434101	57434119	0.825	-	.
	chr1	XieEtAlCTCF	exon	57890365	57890384	0.8374	+	.
	chr1	XieEtAlCTCF	exon	58981656	58981674	0.8586	+	.
	chr1	XieEtAlCTCF	exon	59118444	59118462	0.9083	-	.
	chr1	XieEtAlCTCF	exon	59205708	59205726	0.9333	+	.
	chr1	XieEtAlCTCF	exon	59235106	59235124	0.8483	.	.
	chr1	XieEtAlCTCF	exon	60165095	60165113	0.8653	-	.
	chr1	XieEtAlCTCF	exon	60225303	60225322	0.8584	.	.
	chr1	XieEtAlCTCF	exon	60437223	60437241	0.929	+	.
	chr1	XieEtAlCTCF	exon	60442660	60442679	0.8946	+	.
	chr1	XieEtAlCTCF	exon	60622727	60622745	0.9042	+	.
	chr1	XieEtAlCTCF	exon	61508785	61508804	0.8805	-	.
	chr1	XieEtAlCTCF	exon	61515727	61515746	0.8506	.	.
	chr1	XieEtAlCTCF	exon	62054515	62054533	0.961	-	.
	chr1	XieEtAlCTCF	exon	62317979	62317997	0.926	-	.
	chr1	XieEtAlCTCF	exon	62601601	62601619	0.9264	+	.
	chr1	XieEtAlCTCF	exon	62641426	62641445	0.884	+	.
	chr1	XieEtAlCTCF	exon	62873262	62873281	0.8719	-	.
	chr1	XieEtAlCTCF	exon	62974022	62974041	0.8841	.	.
	chr1	XieEtAlCTCF	exon	63212386	63212404	0.91	-	.
	chr1	XieEtAlCTCF	exon	63307432	63307450	0.9428	+	.
	chr1	XieEtAlCTCF	exon	63377874	63377893	0.9255	.	.
	chr1	XieEtAlCTCF	exon	63429043	63429061	0.9357	+	.
	chr1	XieEtAlCTCF	exon	63470729	63470747	0.8911	+	.
	chr1	XieEtAlCTCF	exon	63614896	63614914	0.8801	-	.
	chr1	XieEtAlCTCF	exon	64023246	64023264	0.9426	+	.
	chr1	XieEtAlCTCF	exon	64140252	64140270	0.904	+	.
	chr1	XieEtAlCTCF	exon	64602949	64602968	0.8235	-	.
	chr1	XieEtAlCTCF	exon	64708851	64708869	0.9054	-	.
	chr1	XieEtAlCTCF	exon	64712200	64712218	0.9546	-	.
	chr1	XieEtAlCTCF	exon	64734919	64734937	0.838	.	.
	chr1	XieEtAlCTCF	exon	65152602	65152620	0.818	+	.
	chr1	XieEtAlCTCF	exon	65290044	65290062	0.957	-	.
	chr1	XieEtAlCTCF	exon	65675136	65675154	0.9117	-	.
	chr1	XieEtAlCTCF	exon	65896968	65896986	0.8876	+	.
	chr1	XieEtAlCTCF	exon	66153537	66153555	0.9735	-	.
	chr1	XieEtAlCTCF	exon	66424708	66424726	0.9007	+	.
	chr1	XieEtAlCTCF	exon	66708546	66708564	0.954	-	.
	chr1	XieEtAlCTCF	exon	66719179	66719197	0.832	+	.
	chr1	XieEtAlCTCF	exon	66912279	66912297	0.9407	-	.
	chr1	XieEtAlCTCF	exon	67230859	67230877	0.9021	+	.
	chr1	XieEtAlCTCF	exon	67461915	67461933	0.9313	+	.
	chr1	XieEtAlCTCF	exon	67677466	67677485	0.8577	-	.
	chr1	XieEtAlCTCF	exon	67680244	67680263	0.8577	+	.
	chr1	XieEtAlCTCF	exon	67699857	67699875	0.9223	+	.
	chr1	XieEtAlCTCF	exon	67813548	67813566	0.9345	+	.
	chr1	XieEtAlCTCF	exon	67998253	67998271	0.9213	+	.
	chr1	XieEtAlCTCF	exon	68226116	68226134	0.8327	-	.
	chr1	XieEtAlCTCF	exon	68582515	68582533	0.9798	+	.
	chr1	XieEtAlCTCF	exon	68808608	68808626	0.9484	-	.
	chr1	XieEtAlCTCF	exon	68812063	68812081	0.8566	-	.
	chr1	XieEtAlCTCF	exon	70203452	70203470	0.9568	-	.
	chr1	XieEtAlCTCF	exon	70598804	70598822	0.8598	+	.
	chr1	XieEtAlCTCF	exon	70975966	70975984	0.9364	-	.
	chr1	XieEtAlCTCF	exon	71332392	71332410	0.8886	+	.
	chr1	XieEtAlCTCF	exon	71515874	71515892	0.8514	-	.
	chr1	XieEtAlCTCF	exon	71987533	71987551	0.8745	-	.
	chr1	XieEtAlCTCF	exon	72503612	72503630	0.9453	-	.
	chr1	XieEtAlCTCF	exon	74464234	74464252	0.969	-	.
	chr1	XieEtAlCTCF	exon	75155675	75155694	0.8748	-	.
	chr1	XieEtAlCTCF	exon	75237794	75237812	0.9411	+	.
	chr1	XieEtAlCTCF	exon	75699192	75699210	0.8447	+	.
	chr1	XieEtAlCTCF	exon	75731558	75731576	0.9275	+	.
	chr1	XieEtAlCTCF	exon	76457381	76457400	0.9282	+	.
	chr1	XieEtAlCTCF	exon	76619981	76620000	0.8653	+	.
	chr1	XieEtAlCTCF	exon	77367030	77367048	0.9048	+	.
	chr1	XieEtAlCTCF	exon	77592102	77592121	0.8412	.	.
	chr1	XieEtAlCTCF	exon	77609394	77609412	0.9341	-	.
	chr1	XieEtAlCTCF	exon	77614067	77614085	0.8575	+	.
	chr1	XieEtAlCTCF	exon	77999556	77999575	0.8507	-	.
	chr1	XieEtAlCTCF	exon	78580271	78580289	0.9244	-	.
	chr1	XieEtAlCTCF	exon	78596629	78596647	0.9609	+	.
	chr1	XieEtAlCTCF	exon	78610910	78610928	0.9291	+	.
	chr1	XieEtAlCTCF	exon	79073202	79073221	0.8437	-	.
	chr1	XieEtAlCTCF	exon	79142227	79142245	0.9478	-	.
	chr1	XieEtAlCTCF	exon	79305566	79305584	0.9252	+	.
	chr1	XieEtAlCTCF	exon	80683228	80683246	0.9303	+	.
	chr1	XieEtAlCTCF	exon	84371176	84371194	0.9393	+	.
	chr1	XieEtAlCTCF	exon	84397532	84397550	0.8717	.	.
	chr1	XieEtAlCTCF	exon	84588664	84588682	0.917	-	.
	chr1	XieEtAlCTCF	exon	84899658	84899677	0.8358	-	.
	chr1	XieEtAlCTCF	exon	85238204	85238222	0.9073	-	.
	chr1	XieEtAlCTCF	exon	85402083	85402101	0.9383	-	.
	chr1	XieEtAlCTCF	exon	85720619	85720637	0.8288	-	.
	chr1	XieEtAlCTCF	exon	85774055	85774074	0.8279	.	.
	chr1	XieEtAlCTCF	exon	85810104	85810123	0.9341	+	.
	chr1	XieEtAlCTCF	exon	86078930	86078948	0.857	+	.
	chr1	XieEtAlCTCF	exon	86158592	86158610	0.8179	-	.
	chr1	XieEtAlCTCF	exon	86484169	86484187	0.9331	-	.
	chr1	XieEtAlCTCF	exon	86939910	86939928	0.8455	+	.
	chr1	XieEtAlCTCF	exon	87207816	87207834	0.8771	.	.
	chr1	XieEtAlCTCF	exon	87299453	87299471	0.9832	+	.
	chr1	XieEtAlCTCF	exon	87431117	87431135	0.9435	-	.
	chr1	XieEtAlCTCF	exon	87550122	87550140	0.9442	-	.
	chr1	XieEtAlCTCF	exon	87758793	87758812	0.9177	+	.
	chr1	XieEtAlCTCF	exon	88419609	88419628	0.8669	-	.
	chr1	XieEtAlCTCF	exon	88646379	88646398	0.9214	.	.
	chr1	XieEtAlCTCF	exon	89073995	89074013	0.815	+	.
	chr1	XieEtAlCTCF	exon	89121560	89121578	0.8742	+	.
	chr1	XieEtAlCTCF	exon	89343234	89343252	0.9467	-	.
	chr1	XieEtAlCTCF	exon	89401789	89401807	0.9434	+	.
	chr1	XieEtAlCTCF	exon	89439400	89439419	0.8348	+	.
	chr1	XieEtAlCTCF	exon	89449713	89449731	0.9628	+	.
	chr1	XieEtAlCTCF	exon	89948991	89949009	0.8741	+	.
	chr1	XieEtAlCTCF	exon	90228690	90228708	0.9302	-	.
	chr1	XieEtAlCTCF	exon	90270387	90270405	0.8707	+	.
	chr1	XieEtAlCTCF	exon	90452946	90452964	0.924	-	.
	chr1	XieEtAlCTCF	exon	90580274	90580292	0.9206	+	.
	chr1	XieEtAlCTCF	exon	91044960	91044978	0.9743	+	.
	chr1	XieEtAlCTCF	exon	91430190	91430208	0.9293	-	.
	chr1	XieEtAlCTCF	exon	91630994	91631013	0.9133	-	.
	chr1	XieEtAlCTCF	exon	91631861	91631879	0.9516	+	.
	chr1	XieEtAlCTCF	exon	91748434	91748453	0.8769	.	.
	chr1	XieEtAlCTCF	exon	91995597	91995615	0.9261	+	.
	chr1	XieEtAlCTCF	exon	92393024	92393042	0.9358	-	.
	chr1	XieEtAlCTCF	exon	92775834	92775852	0.8948	+	.
	chr1	XieEtAlCTCF	exon	92781746	92781765	0.8366	.	.
	chr1	XieEtAlCTCF	exon	93214745	93214764	0.854	+	.
	chr1	XieEtAlCTCF	exon	93324588	93324607	0.8885	+	.
	chr1	XieEtAlCTCF	exon	93324669	93324687	0.9001	+	.
	chr1	XieEtAlCTCF	exon	93903708	93903726	0.9388	+	.
	chr1	XieEtAlCTCF	exon	94095207	94095225	0.9171	+	.
	chr1	XieEtAlCTCF	exon	94279730	94279748	0.8852	-	.
	chr1	XieEtAlCTCF	exon	94491601	94491619	0.949	+	.
	chr1	XieEtAlCTCF	exon	94511252	94511270	0.8627	+	.
	chr1	XieEtAlCTCF	exon	94511469	94511488	0.8882	+	.
	chr1	XieEtAlCTCF	exon	94801538	94801556	0.8541	-	.
	chr1	XieEtAlCTCF	exon	95271555	95271574	0.9084	-	.
	chr1	XieEtAlCTCF	exon	95320121	95320139	0.8915	+	.
	chr1	XieEtAlCTCF	exon	95509148	95509166	0.9692	-	.
	chr1	XieEtAlCTCF	exon	96701885	96701904	0.8415	+	.
	chr1	XieEtAlCTCF	exon	97432290	97432308	0.9525	+	.
	chr1	XieEtAlCTCF	exon	98519866	98519884	0.9013	-	.
	chr1	XieEtAlCTCF	exon	98933863	98933881	0.9258	-	.
	chr1	XieEtAlCTCF	exon	99214885	99214903	0.8598	+	.
	chr1	XieEtAlCTCF	exon	99260016	99260034	0.8564	+	.
	chr1	XieEtAlCTCF	exon	99646005	99646023	0.8884	+	.
	chr1	XieEtAlCTCF	exon	99947133	99947151	0.9101	-	.
	chr1	XieEtAlCTCF	exon	100173289	100173308	0.902	.	.
	chr1	XieEtAlCTCF	exon	100274381	100274399	0.9278	+	.
	chr1	XieEtAlCTCF	exon	100925257	100925275	0.8842	-	.
	chr1	XieEtAlCTCF	exon	101334109	101334127	0.9378	-	.
	chr1	XieEtAlCTCF	exon	101386834	101386853	0.9223	+	.
	chr1	XieEtAlCTCF	exon	101754155	101754173	0.9897	-	.
	chr1	XieEtAlCTCF	exon	101823114	101823132	0.8894	-	.
	chr1	XieEtAlCTCF	exon	101972292	101972310	0.9204	+	.
	chr1	XieEtAlCTCF	exon	103436238	103436256	0.97	-	.
	chr1	XieEtAlCTCF	exon	104003995	104004013	0.8723	-	.
	chr1	XieEtAlCTCF	exon	104057734	104057752	0.8156	-	.
	chr1	XieEtAlCTCF	exon	105190959	105190978	0.9101	+	.
	chr1	XieEtAlCTCF	exon	105323293	105323311	0.8767	+	.
	chr1	XieEtAlCTCF	exon	106565103	106565121	0.9395	+	.
	chr1	XieEtAlCTCF	exon	107973450	107973468	0.9056	+	.
	chr1	XieEtAlCTCF	exon	108072351	108072369	0.9226	-	.
	chr1	XieEtAlCTCF	exon	108293186	108293204	0.9444	-	.
	chr1	XieEtAlCTCF	exon	108325008	108325027	0.8417	+	.
	chr1	XieEtAlCTCF	exon	108668332	108668350	0.94	-	.
	chr1	XieEtAlCTCF	exon	109370910	109370928	0.9276	+	.
	chr1	XieEtAlCTCF	exon	109440920	109440938	0.8991	-	.
	chr1	XieEtAlCTCF	exon	109736458	109736477	0.8252	-	.
	chr1	XieEtAlCTCF	exon	109743914	109743933	0.8616	.	.
	chr1	XieEtAlCTCF	exon	109806539	109806557	0.9149	-	.
	chr1	XieEtAlCTCF	exon	109820235	109820253	0.8979	+	.
	chr1	XieEtAlCTCF	exon	110075084	110075102	0.9428	-	.
	chr1	XieEtAlCTCF	exon	110089059	110089077	0.9645	+	.
	chr1	XieEtAlCTCF	exon	110316469	110316488	0.869	-	.
	chr1	XieEtAlCTCF	exon	110319630	110319648	0.9501	+	.
	chr1	XieEtAlCTCF	exon	110554406	110554425	0.877	.	.
	chr1	XieEtAlCTCF	exon	110596624	110596642	0.9417	+	.
	chr1	XieEtAlCTCF	exon	110630871	110630889	0.8554	+	.
	chr1	XieEtAlCTCF	exon	110648919	110648937	0.9398	-	.
	chr1	XieEtAlCTCF	exon	110745781	110745799	0.9657	+	.
	chr1	XieEtAlCTCF	exon	110750548	110750566	0.9539	+	.
	chr1	XieEtAlCTCF	exon	110855385	110855403	0.9474	-	.
	chr1	XieEtAlCTCF	exon	110955309	110955327	0.9529	+	.
	chr1	XieEtAlCTCF	exon	111003056	111003074	0.9077	-	.
	chr1	XieEtAlCTCF	exon	111038797	111038815	0.879	-	.
	chr1	XieEtAlCTCF	exon	111098048	111098066	0.8999	+	.
	chr1	XieEtAlCTCF	exon	111173556	111173574	0.9655	+	.
	chr1	XieEtAlCTCF	exon	111308851	111308870	0.9118	.	.
	chr1	XieEtAlCTCF	exon	111323673	111323691	0.9754	-	.
	chr1	XieEtAlCTCF	exon	111942604	111942622	0.9874	-	.
	chr1	XieEtAlCTCF	exon	112051006	112051024	0.9294	+	.
	chr1	XieEtAlCTCF	exon	112312355	112312373	0.8944	-	.
	chr1	XieEtAlCTCF	exon	112841372	112841390	0.9005	+	.
	chr1	XieEtAlCTCF	exon	112901588	112901607	0.859	+	.
	chr1	XieEtAlCTCF	exon	112912474	112912493	0.9207	-	.
	chr1	XieEtAlCTCF	exon	113585427	113585446	0.8571	-	.
	chr1	XieEtAlCTCF	exon	113683305	113683323	0.8376	.	.
	chr1	XieEtAlCTCF	exon	114220691	114220709	0.8929	-	.
	chr1	XieEtAlCTCF	exon	114378494	114378512	0.9129	+	.
	chr1	XieEtAlCTCF	exon	114889327	114889345	0.8921	+	.
	chr1	XieEtAlCTCF	exon	115522103	115522122	0.921	.	.
	chr1	XieEtAlCTCF	exon	115655593	115655611	0.8527	-	.
	chr1	XieEtAlCTCF	exon	115681688	115681706	0.8543	+	.
	chr1	XieEtAlCTCF	exon	116012481	116012499	0.9011	-	.
	chr1	XieEtAlCTCF	exon	116049990	116050008	0.8992	.	.
	chr1	XieEtAlCTCF	exon	116138624	116138642	0.8751	-	.
	chr1	XieEtAlCTCF	exon	116260326	116260345	0.9079	.	.
	chr1	XieEtAlCTCF	exon	116350544	116350563	0.8446	+	.
	chr1	XieEtAlCTCF	exon	116681825	116681843	0.9716	+	.
	chr1	XieEtAlCTCF	exon	117028047	117028065	0.9735	-	.
	chr1	XieEtAlCTCF	exon	117117411	117117429	0.9186	+	.
	chr1	XieEtAlCTCF	exon	117139064	117139082	0.9099	-	.
	chr1	XieEtAlCTCF	exon	117280079	117280097	0.9113	+	.
	chr1	XieEtAlCTCF	exon	117360375	117360393	0.9311	-	.
	chr1	XieEtAlCTCF	exon	117397079	117397097	0.9027	+	.
	chr1	XieEtAlCTCF	exon	117598143	117598161	0.9088	-	.
	chr1	XieEtAlCTCF	exon	117610577	117610595	0.9065	+	.
	chr1	XieEtAlCTCF	exon	117671390	117671408	0.9644	-	.
	chr1	XieEtAlCTCF	exon	117827411	117827429	0.892	-	.
	chr1	XieEtAlCTCF	exon	118077793	118077811	0.9878	+	.
	chr1	XieEtAlCTCF	exon	118301642	118301660	0.9955	-	.
	chr1	XieEtAlCTCF	exon	118438323	118438341	0.9515	-	.
	chr1	XieEtAlCTCF	exon	119818212	119818231	0.897	+	.
	chr1	XieEtAlCTCF	exon	119829414	119829432	0.873	+	.
	chr1	XieEtAlCTCF	exon	120086970	120086989	0.8931	+	.
	chr1	XieEtAlCTCF	exon	120113076	120113095	0.8931	+	.
	chr1	XieEtAlCTCF	exon	120150239	120150258	0.8931	+	.
	chr1	XieEtAlCTCF	exon	120218355	120218373	0.9281	-	.
	chr1	XieEtAlCTCF	exon	120351768	120351787	0.893	+	.
	chr1	XieEtAlCTCF	exon	120428970	120428988	0.9495	+	.
	chr1	XieEtAlCTCF	exon	120688544	120688562	0.9313	-	.
	chr1	XieEtAlCTCF	exon	120874587	120874605	0.9123	-	.
	chr1	XieEtAlCTCF	exon	120925585	120925604	0.8778	.	.
	chr1	XieEtAlCTCF	exon	145059144	145059163	0.8311	-	.
	chr1	XieEtAlCTCF	exon	145402176	145402194	0.9393	-	.
	chr1	XieEtAlCTCF	exon	145421813	145421832	0.8588	.	.
	chr1	XieEtAlCTCF	exon	145427573	145427591	0.9454	+	.
	chr1	XieEtAlCTCF	exon	145457395	145457413	0.946	-	.
	chr1	XieEtAlCTCF	exon	146745562	146745580	0.9858	+	.
	chr1	XieEtAlCTCF	exon	146966961	146966979	0.9028	+	.
	chr1	XieEtAlCTCF	exon	147099474	147099492	0.8925	-	.
	chr1	XieEtAlCTCF	exon	147112721	147112739	0.9655	+	.
	chr1	XieEtAlCTCF	exon	147113965	147113983	0.9024	-	.
	chr1	XieEtAlCTCF	exon	147172233	147172251	0.8175	+	.
	chr1	XieEtAlCTCF	exon	147362503	147362522	0.8275	-	.
	chr1	XieEtAlCTCF	exon	147365018	147365036	0.9358	-	.
	chr1	XieEtAlCTCF	exon	149431240	149431258	0.9123	+	.
	chr1	XieEtAlCTCF	exon	149438345	149438363	0.8489	-	.
	chr1	XieEtAlCTCF	exon	149934140	149934158	0.8361	+	.
	chr1	XieEtAlCTCF	exon	150159735	150159753	0.9341	-	.
	chr1	XieEtAlCTCF	exon	150227925	150227944	0.8175	+	.
	chr1	XieEtAlCTCF	exon	150594170	150594188	0.9218	-	.
	chr1	XieEtAlCTCF	exon	150952145	150952163	0.9122	-	.
	chr1	XieEtAlCTCF	exon	151072444	151072462	0.9336	+	.
	chr1	XieEtAlCTCF	exon	151273522	151273541	0.82	+	.
	chr1	XieEtAlCTCF	exon	151313516	151313534	0.9707	-	.
	chr1	XieEtAlCTCF	exon	151416502	151416521	0.8305	+	.
	chr1	XieEtAlCTCF	exon	151566802	151566820	0.9755	+	.
	chr1	XieEtAlCTCF	exon	151665720	151665738	0.8811	+	.
	chr1	XieEtAlCTCF	exon	151707704	151707722	0.9273	-	.
	chr1	XieEtAlCTCF	exon	151809089	151809107	0.8693	-	.
	chr1	XieEtAlCTCF	exon	152025209	152025228	0.9198	+	.
	chr1	XieEtAlCTCF	exon	152114627	152114645	0.9267	+	.
	chr1	XieEtAlCTCF	exon	152371722	152371740	0.924	+	.
	chr1	XieEtAlCTCF	exon	152413522	152413540	0.9337	-	.
	chr1	XieEtAlCTCF	exon	152432930	152432949	0.8917	-	.
	chr1	XieEtAlCTCF	exon	152842477	152842495	0.9022	+	.
	chr1	XieEtAlCTCF	exon	152933315	152933334	0.8892	+	.
	chr1	XieEtAlCTCF	exon	153163045	153163063	0.9327	-	.
	chr1	XieEtAlCTCF	exon	153195711	153195730	0.9679	.	.
	chr1	XieEtAlCTCF	exon	153201926	153201945	0.9679	.	.
	chr1	XieEtAlCTCF	exon	153325088	153325106	0.9587	+	.
	chr1	XieEtAlCTCF	exon	153505772	153505790	0.8277	.	.
	chr1	XieEtAlCTCF	exon	153541178	153541196	0.9469	-	.
	chr1	XieEtAlCTCF	exon	153744560	153744578	0.8912	-	.
	chr1	XieEtAlCTCF	exon	153769867	153769885	0.9077	+	.
	chr1	XieEtAlCTCF	exon	153793970	153793988	0.8207	+	.
	chr1	XieEtAlCTCF	exon	154158736	154158754	0.8966	+	.
	chr1	XieEtAlCTCF	exon	154171673	154171691	0.887	+	.
	chr1	XieEtAlCTCF	exon	154307717	154307735	0.8966	-	.
	chr1	XieEtAlCTCF	exon	154452478	154452496	0.9291	+	.
	chr1	XieEtAlCTCF	exon	154642328	154642346	0.9356	+	.
	chr1	XieEtAlCTCF	exon	154851138	154851157	0.8226	-	.
	chr1	XieEtAlCTCF	exon	154916424	154916442	0.9359	-	.
	chr1	XieEtAlCTCF	exon	154990133	154990151	0.9129	.	.
	chr1	XieEtAlCTCF	exon	155034145	155034163	0.9086	-	.
	chr1	XieEtAlCTCF	exon	155064087	155064106	0.8941	+	.
	chr1	XieEtAlCTCF	exon	155140514	155140533	0.8724	.	.
	chr1	XieEtAlCTCF	exon	155149259	155149277	0.9432	+	.
	chr1	XieEtAlCTCF	exon	155561776	155561795	0.9216	.	.
	chr1	XieEtAlCTCF	exon	156060669	156060688	0.9583	+	.
	chr1	XieEtAlCTCF	exon	156066571	156066589	0.9105	+	.
	chr1	XieEtAlCTCF	exon	156100282	156100300	0.8564	-	.
	chr1	XieEtAlCTCF	exon	156289573	156289591	0.8769	-	.
	chr1	XieEtAlCTCF	exon	156352927	156352945	0.891	+	.
	chr1	XieEtAlCTCF	exon	156355564	156355582	0.904	+	.
	chr1	XieEtAlCTCF	exon	156414395	156414413	0.8996	-	.
	chr1	XieEtAlCTCF	exon	156579054	156579073	0.8638	-	.
	chr1	XieEtAlCTCF	exon	156627417	156627435	0.8957	-	.
	chr1	XieEtAlCTCF	exon	156629897	156629916	0.9253	+	.
	chr1	XieEtAlCTCF	exon	156659459	156659477	0.8726	+	.
	chr1	XieEtAlCTCF	exon	156808856	156808874	0.8623	+	.
	chr1	XieEtAlCTCF	exon	156860083	156860101	0.9285	-	.
	chr1	XieEtAlCTCF	exon	156931693	156931711	0.8775	-	.
	chr1	XieEtAlCTCF	exon	157060097	157060115	0.9705	+	.
	chr1	XieEtAlCTCF	exon	157133610	157133628	0.9267	+	.
	chr1	XieEtAlCTCF	exon	157141910	157141928	0.8172	.	.
	chr1	XieEtAlCTCF	exon	157163594	157163613	0.8412	+	.
	chr1	XieEtAlCTCF	exon	157166864	157166882	0.8172	.	.
	chr1	XieEtAlCTCF	exon	157333528	157333546	0.9114	+	.
	chr1	XieEtAlCTCF	exon	157347218	157347236	0.8172	.	.
	chr1	XieEtAlCTCF	exon	157459336	157459354	0.8369	.	.
	chr1	XieEtAlCTCF	exon	157475628	157475646	0.9114	-	.
	chr1	XieEtAlCTCF	exon	157550165	157550184	0.8801	+	.
	chr1	XieEtAlCTCF	exon	157918526	157918544	0.8806	-	.
	chr1	XieEtAlCTCF	exon	157933598	157933616	0.964	+	.
	chr1	XieEtAlCTCF	exon	158091616	158091634	0.905	-	.
	chr1	XieEtAlCTCF	exon	158094942	158094960	0.963	-	.
	chr1	XieEtAlCTCF	exon	159041958	159041976	0.926	-	.
	chr1	XieEtAlCTCF	exon	159059172	159059190	0.9511	-	.
	chr1	XieEtAlCTCF	exon	159102261	159102280	0.9114	+	.
	chr1	XieEtAlCTCF	exon	159130988	159131006	0.8574	.	.
	chr1	XieEtAlCTCF	exon	159184128	159184146	0.8275	-	.
	chr1	XieEtAlCTCF	exon	159791457	159791475	0.9106	-	.
	chr1	XieEtAlCTCF	exon	159861501	159861519	0.9561	-	.
	chr1	XieEtAlCTCF	exon	159861564	159861582	0.8958	-	.
	chr1	XieEtAlCTCF	exon	159906373	159906391	0.867	+	.
	chr1	XieEtAlCTCF	exon	159977569	159977587	0.9077	-	.
	chr1	XieEtAlCTCF	exon	160016648	160016666	0.8464	.	.
	chr1	XieEtAlCTCF	exon	160048574	160048593	0.8368	.	.
	chr1	XieEtAlCTCF	exon	160163049	160163067	0.9717	+	.
	chr1	XieEtAlCTCF	exon	160221903	160221921	0.8381	.	.
	chr1	XieEtAlCTCF	exon	160346485	160346503	0.9132	-	.
	chr1	XieEtAlCTCF	exon	160398551	160398569	0.8666	+	.
	chr1	XieEtAlCTCF	exon	160577079	160577097	0.8334	-	.
	chr1	XieEtAlCTCF	exon	160645539	160645557	0.9433	+	.
	chr1	XieEtAlCTCF	exon	161162466	161162484	0.9025	+	.
	chr1	XieEtAlCTCF	exon	161179774	161179792	0.956	+	.
	chr1	XieEtAlCTCF	exon	161711425	161711443	0.9375	-	.
	chr1	XieEtAlCTCF	exon	161762630	161762648	0.9008	+	.
	chr1	XieEtAlCTCF	exon	162006907	162006925	0.8804	-	.
	chr1	XieEtAlCTCF	exon	162025934	162025952	0.859	.	.
	chr1	XieEtAlCTCF	exon	162246486	162246504	0.8736	-	.
	chr1	XieEtAlCTCF	exon	162362071	162362089	0.8561	-	.
	chr1	XieEtAlCTCF	exon	162583640	162583658	0.9185	+	.
	chr1	XieEtAlCTCF	exon	162824203	162824221	0.9592	+	.
	chr1	XieEtAlCTCF	exon	163144773	163144791	0.8597	-	.
	chr1	XieEtAlCTCF	exon	163285760	163285779	0.8287	.	.
	chr1	XieEtAlCTCF	exon	163379943	163379961	0.8784	+	.
	chr1	XieEtAlCTCF	exon	163498700	163498718	0.9297	-	.
	chr1	XieEtAlCTCF	exon	163531520	163531539	0.9044	+	.
	chr1	XieEtAlCTCF	exon	164587260	164587278	0.919	-	.
	chr1	XieEtAlCTCF	exon	164643050	164643068	0.9389	+	.
	chr1	XieEtAlCTCF	exon	164756725	164756743	0.9452	-	.
	chr1	XieEtAlCTCF	exon	165098963	165098982	0.8448	.	.
	chr1	XieEtAlCTCF	exon	165114226	165114244	0.9448	+	.
	chr1	XieEtAlCTCF	exon	165227345	165227363	0.9601	+	.
	chr1	XieEtAlCTCF	exon	165336804	165336822	0.9658	+	.
	chr1	XieEtAlCTCF	exon	165338665	165338684	0.8571	-	.
	chr1	XieEtAlCTCF	exon	165362298	165362317	0.8599	+	.
	chr1	XieEtAlCTCF	exon	165571032	165571050	0.9228	+	.
	chr1	XieEtAlCTCF	exon	165840843	165840861	0.9412	-	.
	chr1	XieEtAlCTCF	exon	165883601	165883619	0.866	-	.
	chr1	XieEtAlCTCF	exon	165894102	165894120	0.8609	+	.
	chr1	XieEtAlCTCF	exon	166102678	166102696	0.909	+	.
	chr1	XieEtAlCTCF	exon	166879792	166879810	0.8662	+	.
	chr1	XieEtAlCTCF	exon	167028560	167028578	0.8976	-	.
	chr1	XieEtAlCTCF	exon	167237242	167237261	0.89	.	.
	chr1	XieEtAlCTCF	exon	167411563	167411581	0.9072	-	.
	chr1	XieEtAlCTCF	exon	167509787	167509805	0.9634	-	.
	chr1	XieEtAlCTCF	exon	167525528	167525546	0.9769	-	.
	chr1	XieEtAlCTCF	exon	167772749	167772767	0.9794	-	.
	chr1	XieEtAlCTCF	exon	168312107	168312125	0.9395	+	.
	chr1	XieEtAlCTCF	exon	168409173	168409192	0.8747	+	.
	chr1	XieEtAlCTCF	exon	168572906	168572924	0.8902	.	.
	chr1	XieEtAlCTCF	exon	169317859	169317877	0.92	-	.
	chr1	XieEtAlCTCF	exon	169435687	169435705	0.9148	+	.
	chr1	XieEtAlCTCF	exon	169519652	169519670	0.8333	+	.
	chr1	XieEtAlCTCF	exon	169778943	169778962	0.8247	-	.
	chr1	XieEtAlCTCF	exon	169898231	169898249	0.8576	+	.
	chr1	XieEtAlCTCF	exon	170658844	170658862	0.8905	+	.
	chr1	XieEtAlCTCF	exon	170899083	170899101	0.897	-	.
	chr1	XieEtAlCTCF	exon	171157978	171157997	0.8888	.	.
	chr1	XieEtAlCTCF	exon	171614231	171614250	0.8571	+	.
	chr1	XieEtAlCTCF	exon	171770728	171770746	0.9556	+	.
	chr1	XieEtAlCTCF	exon	171954196	171954214	0.9488	-	.
	chr1	XieEtAlCTCF	exon	171972068	171972086	0.8972	+	.
	chr1	XieEtAlCTCF	exon	172368828	172368847	0.8434	-	.
	chr1	XieEtAlCTCF	exon	172398623	172398641	0.9309	+	.
	chr1	XieEtAlCTCF	exon	172419229	172419247	0.8814	+	.
	chr1	XieEtAlCTCF	exon	172578854	172578872	0.8578	+	.
	chr1	XieEtAlCTCF	exon	172711925	172711943	0.9246	+	.
	chr1	XieEtAlCTCF	exon	172714277	172714295	0.8962	+	.
	chr1	XieEtAlCTCF	exon	173171687	173171705	0.8772	-	.
	chr1	XieEtAlCTCF	exon	173389658	173389676	0.9961	+	.
	chr1	XieEtAlCTCF	exon	174044092	174044110	0.8789	-	.
	chr1	XieEtAlCTCF	exon	174187028	174187046	0.8955	-	.
	chr1	XieEtAlCTCF	exon	174227383	174227401	0.9295	+	.
	chr1	XieEtAlCTCF	exon	174231997	174232016	0.8319	.	.
	chr1	XieEtAlCTCF	exon	174695840	174695858	0.8984	-	.
	chr1	XieEtAlCTCF	exon	174713279	174713297	0.9236	-	.
	chr1	XieEtAlCTCF	exon	174739284	174739302	0.8926	.	.
	chr1	XieEtAlCTCF	exon	174952541	174952559	0.9782	-	.
	chr1	XieEtAlCTCF	exon	174999050	174999068	0.9274	+	.
	chr1	XieEtAlCTCF	exon	175115870	175115889	0.8423	+	.
	chr1	XieEtAlCTCF	exon	175121337	175121355	0.9525	+	.
	chr1	XieEtAlCTCF	exon	175124180	175124198	0.9775	+	.
	chr1	XieEtAlCTCF	exon	175288948	175288966	0.9666	-	.
	chr1	XieEtAlCTCF	exon	175343115	175343133	0.8939	+	.
	chr1	XieEtAlCTCF	exon	176042863	176042881	0.9439	-	.
	chr1	XieEtAlCTCF	exon	176529129	176529147	0.9203	+	.
	chr1	XieEtAlCTCF	exon	176660955	176660973	0.9391	-	.
	chr1	XieEtAlCTCF	exon	176850307	176850326	0.934	-	.
	chr1	XieEtAlCTCF	exon	176867097	176867115	0.949	+	.
	chr1	XieEtAlCTCF	exon	177749425	177749443	0.8876	-	.
	chr1	XieEtAlCTCF	exon	177915273	177915291	0.9379	-	.
	chr1	XieEtAlCTCF	exon	178001124	178001142	0.9462	+	.
	chr1	XieEtAlCTCF	exon	178024427	178024445	0.8948	+	.
	chr1	XieEtAlCTCF	exon	178279955	178279973	0.96	+	.
	chr1	XieEtAlCTCF	exon	178501616	178501635	0.957	+	.
	chr1	XieEtAlCTCF	exon	178722702	178722720	0.8151	-	.
	chr1	XieEtAlCTCF	exon	178743587	178743605	0.9035	+	.
	chr1	XieEtAlCTCF	exon	178971992	178972010	0.8974	-	.
	chr1	XieEtAlCTCF	exon	179090406	179090425	0.8427	+	.
	chr1	XieEtAlCTCF	exon	179339065	179339084	0.9046	-	.
	chr1	XieEtAlCTCF	exon	179779136	179779154	0.9646	-	.
	chr1	XieEtAlCTCF	exon	180221941	180221960	0.8771	+	.
	chr1	XieEtAlCTCF	exon	180385328	180385346	0.9123	-	.
	chr1	XieEtAlCTCF	exon	180451751	180451770	0.8539	-	.
	chr1	XieEtAlCTCF	exon	180485133	180485151	0.8952	.	.
	chr1	XieEtAlCTCF	exon	180502812	180502830	0.9149	+	.
	chr1	XieEtAlCTCF	exon	180832502	180832520	0.9368	-	.
	chr1	XieEtAlCTCF	exon	180851234	180851252	0.913	+	.
	chr1	XieEtAlCTCF	exon	181111790	181111808	0.8958	-	.
	chr1	XieEtAlCTCF	exon	181135893	181135911	0.9151	-	.
	chr1	XieEtAlCTCF	exon	181392883	181392901	0.913	-	.
	chr1	XieEtAlCTCF	exon	181394248	181394266	0.9014	-	.
	chr1	XieEtAlCTCF	exon	181448463	181448482	0.9245	.	.
	chr1	XieEtAlCTCF	exon	181906279	181906297	0.9036	-	.
	chr1	XieEtAlCTCF	exon	182054219	182054237	0.9411	+	.
	chr1	XieEtAlCTCF	exon	182112477	182112495	0.9457	+	.
	chr1	XieEtAlCTCF	exon	182366035	182366053	0.9233	-	.
	chr1	XieEtAlCTCF	exon	182415342	182415360	0.9077	+	.
	chr1	XieEtAlCTCF	exon	182751621	182751639	0.9266	-	.
	chr1	XieEtAlCTCF	exon	183250780	183250798	0.9611	+	.
	chr1	XieEtAlCTCF	exon	183592522	183592541	0.8568	.	.
	chr1	XieEtAlCTCF	exon	183624794	183624812	0.9842	+	.
	chr1	XieEtAlCTCF	exon	183654426	183654444	0.9527	-	.
	chr1	XieEtAlCTCF	exon	183885287	183885305	0.9634	-	.
	chr1	XieEtAlCTCF	exon	184044742	184044760	0.934	+	.
	chr1	XieEtAlCTCF	exon	184191881	184191899	0.9114	-	.
	chr1	XieEtAlCTCF	exon	184661033	184661052	0.8271	-	.
	chr1	XieEtAlCTCF	exon	184774885	184774903	0.9418	+	.
	chr1	XieEtAlCTCF	exon	184951453	184951472	0.9318	-	.
	chr1	XieEtAlCTCF	exon	185139734	185139753	0.8797	-	.
	chr1	XieEtAlCTCF	exon	185529167	185529185	0.9288	-	.
	chr1	XieEtAlCTCF	exon	185621685	185621703	0.8889	+	.
	chr1	XieEtAlCTCF	exon	185650356	185650374	0.826	-	.
	chr1	XieEtAlCTCF	exon	185664628	185664647	0.8534	-	.
	chr1	XieEtAlCTCF	exon	185689962	185689980	0.9197	+	.
	chr1	XieEtAlCTCF	exon	186241853	186241871	0.9365	+	.
	chr1	XieEtAlCTCF	exon	187020925	187020943	0.9344	+	.
	chr1	XieEtAlCTCF	exon	190724083	190724101	0.8866	+	.
	chr1	XieEtAlCTCF	exon	192280609	192280627	0.9147	-	.
	chr1	XieEtAlCTCF	exon	192415166	192415184	0.8902	-	.
	chr1	XieEtAlCTCF	exon	192443389	192443407	0.9159	+	.
	chr1	XieEtAlCTCF	exon	192446925	192446943	0.8844	+	.
	chr1	XieEtAlCTCF	exon	192549741	192549759	0.8963	-	.
	chr1	XieEtAlCTCF	exon	192579426	192579444	0.9128	-	.
	chr1	XieEtAlCTCF	exon	192775085	192775103	0.8614	+	.
	chr1	XieEtAlCTCF	exon	192988762	192988780	0.9442	-	.
	chr1	XieEtAlCTCF	exon	193000715	193000733	0.9243	-	.
	chr1	XieEtAlCTCF	exon	196117699	196117717	0.9271	+	.
	chr1	XieEtAlCTCF	exon	197149601	197149620	0.9251	.	.
	chr1	XieEtAlCTCF	exon	197297103	197297121	0.8832	+	.
	chr1	XieEtAlCTCF	exon	197369360	197369378	0.952	+	.
	chr1	XieEtAlCTCF	exon	197489024	197489042	0.9041	+	.
	chr1	XieEtAlCTCF	exon	197490459	197490477	0.9161	+	.
	chr1	XieEtAlCTCF	exon	197496085	197496103	0.9566	+	.
	chr1	XieEtAlCTCF	exon	197584477	197584495	0.9145	+	.
	chr1	XieEtAlCTCF	exon	197893830	197893848	0.922	-	.
	chr1	XieEtAlCTCF	exon	198434875	198434893	0.9015	-	.
	chr1	XieEtAlCTCF	exon	198740875	198740894	0.8537	+	.
	chr1	XieEtAlCTCF	exon	199521286	199521305	0.9011	-	.
	chr1	XieEtAlCTCF	exon	199653976	199653994	0.9217	+	.
	chr1	XieEtAlCTCF	exon	200249097	200249115	0.8587	+	.
	chr1	XieEtAlCTCF	exon	200479436	200479454	0.9931	-	.
	chr1	XieEtAlCTCF	exon	200528168	200528186	0.8851	+	.
	chr1	XieEtAlCTCF	exon	200772197	200772215	0.9361	-	.
	chr1	XieEtAlCTCF	exon	200807282	200807300	0.9558	-	.
	chr1	XieEtAlCTCF	exon	201012212	201012230	0.896	-	.
	chr1	XieEtAlCTCF	exon	201223853	201223872	0.9155	+	.
	chr1	XieEtAlCTCF	exon	201354597	201354615	0.8945	+	.
	chr1	XieEtAlCTCF	exon	201377507	201377526	0.8964	-	.
	chr1	XieEtAlCTCF	exon	201417397	201417415	0.9572	+	.
	chr1	XieEtAlCTCF	exon	201451031	201451050	0.8942	.	.
	chr1	XieEtAlCTCF	exon	201451367	201451385	0.9456	+	.
	chr1	XieEtAlCTCF	exon	201482241	201482259	0.8755	-	.
	chr1	XieEtAlCTCF	exon	201500052	201500070	0.9038	+	.
	chr1	XieEtAlCTCF	exon	201528953	201528972	0.8753	.	.
	chr1	XieEtAlCTCF	exon	201673499	201673518	0.8376	-	.
	chr1	XieEtAlCTCF	exon	201678778	201678796	0.9312	+	.
	chr1	XieEtAlCTCF	exon	201762334	201762352	0.9153	-	.
	chr1	XieEtAlCTCF	exon	201845455	201845474	0.8807	-	.
	chr1	XieEtAlCTCF	exon	201968934	201968952	0.9279	+	.
	chr1	XieEtAlCTCF	exon	202088259	202088277	0.8956	-	.
	chr1	XieEtAlCTCF	exon	202104480	202104498	0.9354	-	.
	chr1	XieEtAlCTCF	exon	202158224	202158243	0.9643	+	.
	chr1	XieEtAlCTCF	exon	202470596	202470614	0.901	+	.
	chr1	XieEtAlCTCF	exon	202569447	202569465	0.8605	-	.
	chr1	XieEtAlCTCF	exon	202688899	202688917	0.8762	-	.
	chr1	XieEtAlCTCF	exon	202821600	202821618	0.9304	-	.
	chr1	XieEtAlCTCF	exon	203008625	203008643	0.9437	+	.
	chr1	XieEtAlCTCF	exon	203185504	203185522	0.9699	-	.
	chr1	XieEtAlCTCF	exon	203307726	203307744	0.947	-	.
	chr1	XieEtAlCTCF	exon	203309368	203309386	0.9624	+	.
	chr1	XieEtAlCTCF	exon	203457058	203457076	0.9564	-	.
	chr1	XieEtAlCTCF	exon	203473976	203473994	0.9662	+	.
	chr1	XieEtAlCTCF	exon	203671403	203671422	0.896	.	.
	chr1	XieEtAlCTCF	exon	204092685	204092704	0.8824	-	.
	chr1	XieEtAlCTCF	exon	204096946	204096964	0.919	-	.
	chr1	XieEtAlCTCF	exon	204131793	204131811	0.9335	+	.
	chr1	XieEtAlCTCF	exon	204332963	204332981	0.8593	-	.
	chr1	XieEtAlCTCF	exon	204367850	204367868	0.8755	-	.
	chr1	XieEtAlCTCF	exon	204400626	204400645	0.8771	+	.
	chr1	XieEtAlCTCF	exon	204415682	204415700	0.9538	+	.
	chr1	XieEtAlCTCF	exon	204472460	204472478	0.9255	-	.
	chr1	XieEtAlCTCF	exon	204535127	204535145	0.9393	+	.
	chr1	XieEtAlCTCF	exon	204944940	204944958	0.8675	+	.
	chr1	XieEtAlCTCF	exon	204958607	204958625	0.8407	+	.
	chr1	XieEtAlCTCF	exon	205030880	205030899	0.8744	-	.
	chr1	XieEtAlCTCF	exon	205110938	205110956	0.9731	-	.
	chr1	XieEtAlCTCF	exon	205242761	205242779	0.942	+	.
	chr1	XieEtAlCTCF	exon	205294742	205294760	0.8984	-	.
	chr1	XieEtAlCTCF	exon	205304954	205304972	0.9529	+	.
	chr1	XieEtAlCTCF	exon	205323593	205323611	0.9176	+	.
	chr1	XieEtAlCTCF	exon	205400113	205400132	0.8469	.	.
	chr1	XieEtAlCTCF	exon	205454802	205454820	0.9557	-	.
	chr1	XieEtAlCTCF	exon	205457410	205457428	0.9536	+	.
	chr1	XieEtAlCTCF	exon	205493600	205493618	0.9355	-	.
	chr1	XieEtAlCTCF	exon	205626852	205626871	0.8415	-	.
	chr1	XieEtAlCTCF	exon	205680426	205680444	0.9538	-	.
	chr1	XieEtAlCTCF	exon	206173754	206173772	0.9123	-	.
	chr1	XieEtAlCTCF	exon	206234554	206234572	0.9502	+	.
	chr1	XieEtAlCTCF	exon	206663585	206663603	0.9132	+	.
	chr1	XieEtAlCTCF	exon	206899797	206899815	0.9792	+	.
	chr1	XieEtAlCTCF	exon	206983018	206983036	0.9304	+	.
	chr1	XieEtAlCTCF	exon	207084610	207084628	0.8901	-	.
	chr1	XieEtAlCTCF	exon	207086024	207086042	0.9697	-	.
	chr1	XieEtAlCTCF	exon	207106857	207106875	0.9207	-	.
	chr1	XieEtAlCTCF	exon	207155643	207155661	0.9184	-	.
	chr1	XieEtAlCTCF	exon	207578445	207578463	0.8775	-	.
	chr1	XieEtAlCTCF	exon	207970853	207970871	0.9107	-	.
	chr1	XieEtAlCTCF	exon	208058584	208058603	0.9181	+	.
	chr1	XieEtAlCTCF	exon	208137052	208137070	0.9379	-	.
	chr1	XieEtAlCTCF	exon	208171312	208171330	0.9151	-	.
	chr1	XieEtAlCTCF	exon	208267285	208267303	0.8755	-	.
	chr1	XieEtAlCTCF	exon	208305702	208305721	0.826	.	.
	chr1	XieEtAlCTCF	exon	208412553	208412571	0.8696	-	.
	chr1	XieEtAlCTCF	exon	208825832	208825850	0.9144	+	.
	chr1	XieEtAlCTCF	exon	209376351	209376369	0.9365	+	.
	chr1	XieEtAlCTCF	exon	209422192	209422210	0.962	-	.
	chr1	XieEtAlCTCF	exon	209527835	209527853	0.9467	-	.
	chr1	XieEtAlCTCF	exon	209686842	209686860	0.8382	-	.
	chr1	XieEtAlCTCF	exon	209739588	209739606	0.9139	-	.
	chr1	XieEtAlCTCF	exon	209742965	209742983	0.9095	+	.
	chr1	XieEtAlCTCF	exon	209750240	209750258	0.9239	+	.
	chr1	XieEtAlCTCF	exon	209801168	209801186	0.9362	-	.
	chr1	XieEtAlCTCF	exon	210033824	210033843	0.9282	+	.
	chr1	XieEtAlCTCF	exon	210484617	210484635	0.9022	-	.
	chr1	XieEtAlCTCF	exon	210534325	210534343	0.8389	+	.
	chr1	XieEtAlCTCF	exon	210580738	210580756	0.95	+	.
	chr1	XieEtAlCTCF	exon	210621819	210621837	0.9322	+	.
	chr1	XieEtAlCTCF	exon	210757884	210757902	0.8918	.	.
	chr1	XieEtAlCTCF	exon	211123477	211123496	0.8669	-	.
	chr1	XieEtAlCTCF	exon	211687492	211687510	0.8662	-	.
	chr1	XieEtAlCTCF	exon	211828722	211828741	0.8283	.	.
	chr1	XieEtAlCTCF	exon	211854220	211854238	0.8976	+	.
	chr1	XieEtAlCTCF	exon	212236376	212236394	0.89	+	.
	chr1	XieEtAlCTCF	exon	212244237	212244255	0.9113	+	.
	chr1	XieEtAlCTCF	exon	212629394	212629412	0.9672	-	.
	chr1	XieEtAlCTCF	exon	212650663	212650681	0.9277	+	.
	chr1	XieEtAlCTCF	exon	212838746	212838764	0.9274	+	.
	chr1	XieEtAlCTCF	exon	212923356	212923374	0.962	+	.
	chr1	XieEtAlCTCF	exon	212955961	212955979	0.9098	-	.
	chr1	XieEtAlCTCF	exon	213094446	213094464	0.9221	+	.
	chr1	XieEtAlCTCF	exon	213295992	213296010	0.9693	+	.
	chr1	XieEtAlCTCF	exon	213418110	213418128	0.9598	+	.
	chr1	XieEtAlCTCF	exon	214296692	214296710	0.9511	-	.
	chr1	XieEtAlCTCF	exon	214387454	214387472	0.9596	+	.
	chr1	XieEtAlCTCF	exon	214502347	214502365	0.8198	-	.
	chr1	XieEtAlCTCF	exon	214506449	214506468	0.8475	+	.
	chr1	XieEtAlCTCF	exon	214801491	214801509	0.8991	-	.
	chr1	XieEtAlCTCF	exon	214801674	214801693	0.8665	+	.
	chr1	XieEtAlCTCF	exon	215700080	215700098	0.9274	-	.
	chr1	XieEtAlCTCF	exon	215780106	215780124	0.9461	-	.
	chr1	XieEtAlCTCF	exon	216916165	216916184	0.8596	-	.
	chr1	XieEtAlCTCF	exon	216923548	216923566	0.8875	+	.
	chr1	XieEtAlCTCF	exon	217920699	217920718	0.8514	-	.
	chr1	XieEtAlCTCF	exon	218344848	218344866	0.9261	-	.
	chr1	XieEtAlCTCF	exon	218472919	218472937	0.8732	+	.
	chr1	XieEtAlCTCF	exon	218503565	218503584	0.8851	+	.
	chr1	XieEtAlCTCF	exon	218534861	218534880	0.8222	.	.
	chr1	XieEtAlCTCF	exon	218695106	218695124	0.8563	-	.
	chr1	XieEtAlCTCF	exon	219378147	219378165	0.9001	+	.
	chr1	XieEtAlCTCF	exon	219559345	219559363	0.8722	-	.
	chr1	XieEtAlCTCF	exon	219834567	219834586	0.8234	.	.
	chr1	XieEtAlCTCF	exon	219986145	219986163	0.9065	-	.
	chr1	XieEtAlCTCF	exon	220286664	220286683	0.8641	.	.
	chr1	XieEtAlCTCF	exon	220469757	220469775	0.8556	+	.
	chr1	XieEtAlCTCF	exon	220906590	220906609	0.8572	-	.
	chr1	XieEtAlCTCF	exon	220950226	220950244	0.8353	.	.
	chr1	XieEtAlCTCF	exon	220977158	220977176	0.9322	-	.
	chr1	XieEtAlCTCF	exon	221047725	221047743	0.9104	+	.
	chr1	XieEtAlCTCF	exon	221376984	221377002	0.9543	-	.
	chr1	XieEtAlCTCF	exon	221437283	221437301	0.9674	+	.
	chr1	XieEtAlCTCF	exon	221651558	221651577	0.8452	.	.
	chr1	XieEtAlCTCF	exon	222628643	222628661	0.875	-	.
	chr1	XieEtAlCTCF	exon	222628643	222628661	0.875	-	.
	chr1	XieEtAlCTCF	exon	222807936	222807955	0.8546	-	.
	chr1	XieEtAlCTCF	exon	222807936	222807955	0.8546	-	.
	chr1	XieEtAlCTCF	exon	222807936	222807955	0.8546	-	.
	chr1	XieEtAlCTCF	exon	222966275	222966294	0.8577	.	.
	chr1	XieEtAlCTCF	exon	222966275	222966294	0.8577	.	.
	chr1	XieEtAlCTCF	exon	222966275	222966294	0.8577	.	.
	chr1	XieEtAlCTCF	exon	223254925	223254944	0.8891	.	.
	chr1	XieEtAlCTCF	exon	223937014	223937032	0.978	-	.
	chr1	XieEtAlCTCF	exon	224304014	224304032	0.9529	+	.
	chr1	XieEtAlCTCF	exon	224521216	224521235	0.8287	-	.
	chr1	XieEtAlCTCF	exon	224645402	224645420	0.9303	-	.
	chr1	XieEtAlCTCF	exon	224832435	224832453	0.9206	+	.
	chr1	XieEtAlCTCF	exon	225040838	225040856	0.8582	-	.
	chr1	XieEtAlCTCF	exon	225960179	225960197	0.9238	-	.
	chr1	XieEtAlCTCF	exon	226163855	226163873	0.9557	-	.
	chr1	XieEtAlCTCF	exon	226175388	226175407	0.8711	.	.
	chr1	XieEtAlCTCF	exon	226252680	226252698	0.9068	+	.
	chr1	XieEtAlCTCF	exon	226309332	226309350	0.8728	-	.
	chr1	XieEtAlCTCF	exon	226313038	226313056	0.9467	+	.
	chr1	XieEtAlCTCF	exon	226384850	226384869	0.8916	-	.
	chr1	XieEtAlCTCF	exon	226612365	226612383	0.8971	+	.
	chr1	XieEtAlCTCF	exon	226814335	226814353	0.9216	+	.
	chr1	XieEtAlCTCF	exon	226821991	226822009	0.9535	+	.
	chr1	XieEtAlCTCF	exon	227015941	227015959	0.8663	.	.
	chr1	XieEtAlCTCF	exon	227100478	227100496	0.9329	+	.
	chr1	XieEtAlCTCF	exon	227636958	227636976	0.9233	+	.
	chr1	XieEtAlCTCF	exon	227950295	227950313	0.9414	+	.
	chr1	XieEtAlCTCF	exon	228141773	228141791	0.9235	-	.
	chr1	XieEtAlCTCF	exon	228187238	228187256	0.9206	+	.
	chr1	XieEtAlCTCF	exon	229393948	229393966	0.9221	+	.
	chr1	XieEtAlCTCF	exon	230446498	230446516	0.9542	-	.
	chr1	XieEtAlCTCF	exon	230933787	230933806	0.8906	+	.
	chr1	XieEtAlCTCF	exon	231451720	231451738	0.8963	.	.
	chr1	XieEtAlCTCF	exon	231493742	231493761	0.9088	.	.
	chr1	XieEtAlCTCF	exon	231726511	231726529	0.8944	-	.
	chr1	XieEtAlCTCF	exon	231739928	231739946	0.9047	-	.
	chr1	XieEtAlCTCF	exon	232771687	232771705	0.8862	+	.
	chr1	XieEtAlCTCF	exon	233377007	233377025	0.9146	-	.
	chr1	XieEtAlCTCF	exon	233440426	233440444	0.8924	+	.
	chr1	XieEtAlCTCF	exon	233500630	233500648	0.9173	+	.
	chr1	XieEtAlCTCF	exon	233530796	233530814	0.9055	+	.
	chr1	XieEtAlCTCF	exon	233927024	233927042	0.85	-	.
	chr1	XieEtAlCTCF	exon	234250515	234250533	0.8758	+	.
	chr1	XieEtAlCTCF	exon	234445865	234445883	0.8456	-	.
	chr1	XieEtAlCTCF	exon	234622877	234622895	0.8514	+	.
	chr1	XieEtAlCTCF	exon	234634982	234635000	0.8876	+	.
	chr1	XieEtAlCTCF	exon	235247200	235247218	0.8436	.	.
	chr1	XieEtAlCTCF	exon	235257318	235257336	0.8946	+	.
	chr1	XieEtAlCTCF	exon	235267669	235267687	0.8187	.	.
	chr1	XieEtAlCTCF	exon	235946661	235946679	0.9311	-	.
	chr1	XieEtAlCTCF	exon	236006878	236006897	0.8458	-	.
	chr1	XieEtAlCTCF	exon	236135209	236135227	0.9114	-	.
	chr1	XieEtAlCTCF	exon	236267102	236267120	0.9099	+	.
	chr1	XieEtAlCTCF	exon	236653382	236653400	0.9304	-	.
	chr1	XieEtAlCTCF	exon	236772613	236772631	0.8669	+	.
	chr1	XieEtAlCTCF	exon	237550070	237550088	0.8672	-	.
	chr1	XieEtAlCTCF	exon	237725707	237725725	0.9527	-	.
	chr1	XieEtAlCTCF	exon	237977803	237977822	0.8404	+	.
	chr1	XieEtAlCTCF	exon	239568955	239568973	0.9373	+	.
	chr1	XieEtAlCTCF	exon	240061619	240061637	0.8887	-	.
	chr1	XieEtAlCTCF	exon	240167596	240167614	0.9888	-	.
	chr1	XieEtAlCTCF	exon	240312972	240312990	0.9415	-	.
	chr1	XieEtAlCTCF	exon	240772219	240772237	0.9246	-	.
	chr1	XieEtAlCTCF	exon	240855579	240855597	0.9023	-	.
	chr1	XieEtAlCTCF	exon	240895792	240895810	0.9242	+	.
	chr1	XieEtAlCTCF	exon	241774484	241774502	0.9308	+	.
	chr1	XieEtAlCTCF	exon	242183317	242183335	0.9182	+	.
	chr1	XieEtAlCTCF	exon	243488797	243488815	0.8515	-	.
	chr1	XieEtAlCTCF	exon	243507428	243507446	0.931	+	.
	chr1	XieEtAlCTCF	exon	243639499	243639518	0.8567	+	.
	chr1	XieEtAlCTCF	exon	243871690	243871708	0.8858	.	.
	chr1	XieEtAlCTCF	exon	243912178	243912196	0.9304	-	.
	chr1	XieEtAlCTCF	exon	244436453	244436471	0.8747	-	.
	chr1	XieEtAlCTCF	exon	244436507	244436525	0.9629	-	.
	chr1	XieEtAlCTCF	exon	244462930	244462948	0.907	-	.
	chr1	XieEtAlCTCF	exon	244766901	244766919	0.9811	+	.
	chr1	XieEtAlCTCF	exon	244960298	244960317	0.904	-	.
	chr1	XieEtAlCTCF	exon	246166624	246166643	0.9461	-	.
	chr1	XieEtAlCTCF	exon	246175748	246175767	0.8321	+	.
	chr1	XieEtAlCTCF	exon	246280666	246280684	0.867	-	.
	chr1	XieEtAlCTCF	exon	246444060	246444078	0.887	-	.
	chr1	XieEtAlCTCF	exon	246614246	246614264	0.8397	-	.
	chr1	XieEtAlCTCF	exon	246656117	246656135	0.9078	-	.
	chr1	XieEtAlCTCF	exon	248785962	248785980	0.9318	+	.
	chr2	XieEtAlCTCF	exon	246667	246685	0.903	+	.
	chr2	XieEtAlCTCF	exon	662722	662740	0.8727	-	.
	chr2	XieEtAlCTCF	exon	950248	950266	0.8229	+	.
	chr2	XieEtAlCTCF	exon	1821458	1821476	0.9018	-	.
	chr2	XieEtAlCTCF	exon	2124742	2124761	0.9193	+	.
	chr2	XieEtAlCTCF	exon	3466192	3466210	0.8606	-	.
	chr2	XieEtAlCTCF	exon	3698774	3698792	0.9662	-	.
	chr2	XieEtAlCTCF	exon	3875410	3875428	0.8514	-	.
	chr2	XieEtAlCTCF	exon	4007074	4007092	0.9062	+	.
	chr2	XieEtAlCTCF	exon	5506190	5506209	0.9116	-	.
	chr2	XieEtAlCTCF	exon	6493225	6493243	0.891	+	.
	chr2	XieEtAlCTCF	exon	6913450	6913468	0.9384	-	.
	chr2	XieEtAlCTCF	exon	6968549	6968567	0.8419	-	.
	chr2	XieEtAlCTCF	exon	7178040	7178058	0.8766	+	.
	chr2	XieEtAlCTCF	exon	7237555	7237574	0.8517	+	.
	chr2	XieEtAlCTCF	exon	7259333	7259352	0.8736	+	.
	chr2	XieEtAlCTCF	exon	7343265	7343283	0.8425	+	.
	chr2	XieEtAlCTCF	exon	7567606	7567624	0.932	+	.
	chr2	XieEtAlCTCF	exon	7812374	7812392	0.9474	-	.
	chr2	XieEtAlCTCF	exon	8826053	8826072	0.9118	-	.
	chr2	XieEtAlCTCF	exon	8901879	8901897	0.8784	-	.
	chr2	XieEtAlCTCF	exon	9280012	9280031	0.9168	-	.
	chr2	XieEtAlCTCF	exon	9283020	9283039	0.8981	.	.
	chr2	XieEtAlCTCF	exon	9939974	9939992	0.9632	+	.
	chr2	XieEtAlCTCF	exon	10212874	10212892	0.9538	+	.
	chr2	XieEtAlCTCF	exon	10575237	10575255	0.9487	-	.
	chr2	XieEtAlCTCF	exon	11618227	11618246	0.9041	+	.
	chr2	XieEtAlCTCF	exon	11828716	11828734	0.8756	.	.
	chr2	XieEtAlCTCF	exon	11919480	11919498	0.9474	-	.
	chr2	XieEtAlCTCF	exon	11925220	11925239	0.8826	-	.
	chr2	XieEtAlCTCF	exon	11969528	11969546	0.9193	+	.
	chr2	XieEtAlCTCF	exon	12003926	12003945	0.8663	.	.
	chr2	XieEtAlCTCF	exon	13071528	13071546	0.9094	-	.
	chr2	XieEtAlCTCF	exon	13334237	13334255	0.9292	+	.
	chr2	XieEtAlCTCF	exon	15728639	15728657	0.9387	-	.
	chr2	XieEtAlCTCF	exon	15777574	15777593	0.8442	+	.
	chr2	XieEtAlCTCF	exon	16463285	16463304	0.9018	.	.
	chr2	XieEtAlCTCF	exon	16689692	16689710	0.8842	.	.
	chr2	XieEtAlCTCF	exon	16706721	16706740	0.8719	+	.
	chr2	XieEtAlCTCF	exon	16734688	16734706	0.9049	+	.
	chr2	XieEtAlCTCF	exon	16790481	16790499	0.8966	-	.
	chr2	XieEtAlCTCF	exon	16938629	16938647	0.9368	-	.
	chr2	XieEtAlCTCF	exon	16954518	16954537	0.8679	.	.
	chr2	XieEtAlCTCF	exon	17491190	17491208	0.9319	-	.
	chr2	XieEtAlCTCF	exon	17852497	17852515	0.932	-	.
	chr2	XieEtAlCTCF	exon	18559489	18559507	0.8997	-	.
	chr2	XieEtAlCTCF	exon	18569134	18569152	0.9159	+	.
	chr2	XieEtAlCTCF	exon	18616883	18616902	0.8743	+	.
	chr2	XieEtAlCTCF	exon	18701966	18701984	0.8975	+	.
	chr2	XieEtAlCTCF	exon	19550038	19550056	0.9692	+	.
	chr2	XieEtAlCTCF	exon	19562931	19562950	0.8478	-	.
	chr2	XieEtAlCTCF	exon	19946589	19946607	0.9276	-	.
	chr2	XieEtAlCTCF	exon	20063314	20063332	0.8174	.	.
	chr2	XieEtAlCTCF	exon	20578956	20578974	0.9133	+	.
	chr2	XieEtAlCTCF	exon	20842326	20842345	0.8926	-	.
	chr2	XieEtAlCTCF	exon	20861411	20861429	0.96	+	.
	chr2	XieEtAlCTCF	exon	20882123	20882141	0.9306	+	.
	chr2	XieEtAlCTCF	exon	20981614	20981632	0.9151	+	.
	chr2	XieEtAlCTCF	exon	21186014	21186032	0.973	-	.
	chr2	XieEtAlCTCF	exon	24632981	24632999	0.8842	+	.
	chr2	XieEtAlCTCF	exon	25389089	25389107	0.9048	+	.
	chr2	XieEtAlCTCF	exon	25419471	25419489	0.9674	-	.
	chr2	XieEtAlCTCF	exon	25584971	25584990	0.8419	.	.
	chr2	XieEtAlCTCF	exon	25745157	25745175	0.8898	-	.
	chr2	XieEtAlCTCF	exon	26074968	26074986	0.9243	+	.
	chr2	XieEtAlCTCF	exon	26174050	26174069	0.8413	+	.
	chr2	XieEtAlCTCF	exon	26214578	26214597	0.8363	+	.
	chr2	XieEtAlCTCF	exon	26311112	26311130	0.878	.	.
	chr2	XieEtAlCTCF	exon	26692147	26692165	0.923	-	.
	chr2	XieEtAlCTCF	exon	26800863	26800881	0.9712	-	.
	chr2	XieEtAlCTCF	exon	26828490	26828508	0.9317	+	.
	chr2	XieEtAlCTCF	exon	26968779	26968797	0.9274	-	.
	chr2	XieEtAlCTCF	exon	27184755	27184774	0.8631	.	.
	chr2	XieEtAlCTCF	exon	27239904	27239922	0.9542	-	.
	chr2	XieEtAlCTCF	exon	27321649	27321667	0.8246	.	.
	chr2	XieEtAlCTCF	exon	27502918	27502937	0.8871	-	.
	chr2	XieEtAlCTCF	exon	27926797	27926815	0.9706	+	.
	chr2	XieEtAlCTCF	exon	28378666	28378684	0.8343	+	.
	chr2	XieEtAlCTCF	exon	28619819	28619837	0.9006	-	.
	chr2	XieEtAlCTCF	exon	28675524	28675542	0.851	-	.
	chr2	XieEtAlCTCF	exon	28817330	28817348	0.9718	+	.
	chr2	XieEtAlCTCF	exon	29044409	29044427	0.8995	+	.
	chr2	XieEtAlCTCF	exon	29181660	29181678	0.8968	+	.
	chr2	XieEtAlCTCF	exon	29419857	29419875	0.9029	-	.
	chr2	XieEtAlCTCF	exon	29461568	29461587	0.8379	+	.
	chr2	XieEtAlCTCF	exon	30249484	30249502	0.9323	-	.
	chr2	XieEtAlCTCF	exon	30295302	30295320	0.8232	.	.
	chr2	XieEtAlCTCF	exon	30313874	30313892	0.8873	+	.
	chr2	XieEtAlCTCF	exon	30338730	30338748	0.8638	-	.
	chr2	XieEtAlCTCF	exon	30431412	30431430	0.8816	+	.
	chr2	XieEtAlCTCF	exon	30930053	30930071	0.9539	-	.
	chr2	XieEtAlCTCF	exon	30934615	30934634	0.8293	.	.
	chr2	XieEtAlCTCF	exon	30937127	30937145	0.9359	+	.
	chr2	XieEtAlCTCF	exon	31085134	31085152	0.9145	-	.
	chr2	XieEtAlCTCF	exon	31556623	31556641	0.8974	-	.
	chr2	XieEtAlCTCF	exon	32062554	32062572	0.8608	-	.
	chr2	XieEtAlCTCF	exon	32779102	32779120	0.9043	+	.
	chr2	XieEtAlCTCF	exon	33605258	33605276	0.9172	-	.
	chr2	XieEtAlCTCF	exon	33620910	33620928	0.851	-	.
	chr2	XieEtAlCTCF	exon	33638182	33638200	0.9203	+	.
	chr2	XieEtAlCTCF	exon	33666483	33666501	0.9068	-	.
	chr2	XieEtAlCTCF	exon	33808487	33808506	0.846	.	.
	chr2	XieEtAlCTCF	exon	36549470	36549488	0.919	-	.
	chr2	XieEtAlCTCF	exon	36579350	36579368	0.9195	+	.
	chr2	XieEtAlCTCF	exon	36891437	36891456	0.844	-	.
	chr2	XieEtAlCTCF	exon	36998026	36998044	0.8735	-	.
	chr2	XieEtAlCTCF	exon	37007553	37007571	0.8696	+	.
	chr2	XieEtAlCTCF	exon	37012503	37012521	0.9645	-	.
	chr2	XieEtAlCTCF	exon	38104812	38104831	0.9091	-	.
	chr2	XieEtAlCTCF	exon	38209420	38209439	0.8771	+	.
	chr2	XieEtAlCTCF	exon	38543054	38543073	0.8756	+	.
	chr2	XieEtAlCTCF	exon	38735665	38735684	0.8345	-	.
	chr2	XieEtAlCTCF	exon	38763399	38763418	0.9326	+	.
	chr2	XieEtAlCTCF	exon	38953325	38953343	0.9009	-	.
	chr2	XieEtAlCTCF	exon	38968191	38968210	0.8936	-	.
	chr2	XieEtAlCTCF	exon	39174969	39174987	0.9214	+	.
	chr2	XieEtAlCTCF	exon	39286683	39286702	0.8603	+	.
	chr2	XieEtAlCTCF	exon	39606992	39607010	0.8956	+	.
	chr2	XieEtAlCTCF	exon	39821068	39821086	0.8148	+	.
	chr2	XieEtAlCTCF	exon	39958027	39958045	0.8869	-	.
	chr2	XieEtAlCTCF	exon	40140893	40140911	0.9062	+	.
	chr2	XieEtAlCTCF	exon	40440470	40440488	0.8301	+	.
	chr2	XieEtAlCTCF	exon	40471926	40471944	0.9049	+	.
	chr2	XieEtAlCTCF	exon	40987388	40987406	0.8702	-	.
	chr2	XieEtAlCTCF	exon	41926126	41926144	0.9419	-	.
	chr2	XieEtAlCTCF	exon	42009895	42009913	0.952	-	.
	chr2	XieEtAlCTCF	exon	42080989	42081007	0.9494	+	.
	chr2	XieEtAlCTCF	exon	42097035	42097054	0.903	+	.
	chr2	XieEtAlCTCF	exon	42313773	42313791	0.9185	-	.
	chr2	XieEtAlCTCF	exon	42323235	42323253	0.896	+	.
	chr2	XieEtAlCTCF	exon	43054918	43054937	0.8646	.	.
	chr2	XieEtAlCTCF	exon	43056157	43056175	0.9429	+	.
	chr2	XieEtAlCTCF	exon	43086275	43086293	0.9672	+	.
	chr2	XieEtAlCTCF	exon	43174160	43174178	0.9293	+	.
	chr2	XieEtAlCTCF	exon	43202375	43202394	0.8751	+	.
	chr2	XieEtAlCTCF	exon	43249560	43249578	0.9361	-	.
	chr2	XieEtAlCTCF	exon	43354467	43354486	0.9702	+	.
	chr2	XieEtAlCTCF	exon	43456835	43456854	0.9512	-	.
	chr2	XieEtAlCTCF	exon	43711630	43711648	0.8906	-	.
	chr2	XieEtAlCTCF	exon	43769599	43769617	0.8409	-	.
	chr2	XieEtAlCTCF	exon	43804612	43804631	0.8727	.	.
	chr2	XieEtAlCTCF	exon	43832422	43832440	0.8734	+	.
	chr2	XieEtAlCTCF	exon	43836632	43836650	0.9663	-	.
	chr2	XieEtAlCTCF	exon	44105203	44105221	0.9276	+	.
	chr2	XieEtAlCTCF	exon	44314494	44314512	0.8973	+	.
	chr2	XieEtAlCTCF	exon	44471357	44471375	0.9608	+	.
	chr2	XieEtAlCTCF	exon	44619677	44619695	0.8642	+	.
	chr2	XieEtAlCTCF	exon	44706711	44706729	0.8459	+	.
	chr2	XieEtAlCTCF	exon	45182937	45182955	0.9116	-	.
	chr2	XieEtAlCTCF	exon	45208918	45208937	0.9095	+	.
	chr2	XieEtAlCTCF	exon	45722009	45722027	0.8864	-	.
	chr2	XieEtAlCTCF	exon	45870964	45870983	0.9485	+	.
	chr2	XieEtAlCTCF	exon	46005916	46005934	0.9507	-	.
	chr2	XieEtAlCTCF	exon	46220721	46220740	0.8193	+	.
	chr2	XieEtAlCTCF	exon	46238168	46238186	0.9284	+	.
	chr2	XieEtAlCTCF	exon	46290239	46290257	0.8878	+	.
	chr2	XieEtAlCTCF	exon	46592200	46592218	0.9263	-	.
	chr2	XieEtAlCTCF	exon	46688695	46688713	0.8623	-	.
	chr2	XieEtAlCTCF	exon	46691790	46691808	0.9514	+	.
	chr2	XieEtAlCTCF	exon	46859662	46859680	0.9237	+	.
	chr2	XieEtAlCTCF	exon	46877851	46877869	0.9591	-	.
	chr2	XieEtAlCTCF	exon	47116340	47116358	0.8871	.	.
	chr2	XieEtAlCTCF	exon	47214314	47214332	0.9551	+	.
	chr2	XieEtAlCTCF	exon	47550425	47550443	0.8669	-	.
	chr2	XieEtAlCTCF	exon	47562379	47562397	0.9125	+	.
	chr2	XieEtAlCTCF	exon	47995210	47995228	0.9705	-	.
	chr2	XieEtAlCTCF	exon	48085146	48085165	0.8504	+	.
	chr2	XieEtAlCTCF	exon	48333845	48333864	0.9196	-	.
	chr2	XieEtAlCTCF	exon	48338468	48338486	0.878	+	.
	chr2	XieEtAlCTCF	exon	48816495	48816514	0.906	-	.
	chr2	XieEtAlCTCF	exon	48827542	48827561	0.8477	.	.
	chr2	XieEtAlCTCF	exon	48828691	48828710	0.9109	+	.
	chr2	XieEtAlCTCF	exon	49173790	49173808	0.9097	+	.
	chr2	XieEtAlCTCF	exon	50629676	50629694	0.8946	-	.
	chr2	XieEtAlCTCF	exon	50718866	50718884	0.9312	+	.
	chr2	XieEtAlCTCF	exon	50719795	50719813	0.9186	-	.
	chr2	XieEtAlCTCF	exon	50756940	50756958	0.8264	+	.
	chr2	XieEtAlCTCF	exon	53967499	53967517	0.9372	-	.
	chr2	XieEtAlCTCF	exon	54750017	54750035	0.9269	+	.
	chr2	XieEtAlCTCF	exon	55065869	55065887	0.9138	-	.
	chr2	XieEtAlCTCF	exon	55242271	55242289	0.8997	+	.
	chr2	XieEtAlCTCF	exon	55738822	55738840	0.8871	-	.
	chr2	XieEtAlCTCF	exon	55945495	55945513	0.9211	+	.
	chr2	XieEtAlCTCF	exon	56188626	56188644	0.9466	-	.
	chr2	XieEtAlCTCF	exon	56359486	56359504	0.9156	-	.
	chr2	XieEtAlCTCF	exon	57724821	57724839	0.958	-	.
	chr2	XieEtAlCTCF	exon	57744071	57744089	0.9359	-	.
	chr2	XieEtAlCTCF	exon	57948131	57948150	0.859	+	.
	chr2	XieEtAlCTCF	exon	57987137	57987155	0.9931	+	.
	chr2	XieEtAlCTCF	exon	58989513	58989531	0.92	+	.
	chr2	XieEtAlCTCF	exon	59252474	59252493	0.8991	+	.
	chr2	XieEtAlCTCF	exon	59529138	59529157	0.9088	.	.
	chr2	XieEtAlCTCF	exon	60788095	60788113	0.9807	+	.
	chr2	XieEtAlCTCF	exon	60869616	60869634	0.9478	-	.
	chr2	XieEtAlCTCF	exon	60901872	60901890	0.9798	-	.
	chr2	XieEtAlCTCF	exon	60934986	60935004	0.8312	+	.
	chr2	XieEtAlCTCF	exon	61021596	61021614	0.843	+	.
	chr2	XieEtAlCTCF	exon	61226254	61226272	0.9027	-	.
	chr2	XieEtAlCTCF	exon	61886200	61886218	0.9566	-	.
	chr2	XieEtAlCTCF	exon	62020603	62020621	0.9024	-	.
	chr2	XieEtAlCTCF	exon	62126128	62126147	0.8561	.	.
	chr2	XieEtAlCTCF	exon	62639391	62639409	0.9616	-	.
	chr2	XieEtAlCTCF	exon	62684244	62684262	0.9158	+	.
	chr2	XieEtAlCTCF	exon	63014651	63014669	0.9152	+	.
	chr2	XieEtAlCTCF	exon	63306189	63306207	0.9021	+	.
	chr2	XieEtAlCTCF	exon	63715436	63715454	0.9123	-	.
	chr2	XieEtAlCTCF	exon	63919327	63919345	0.9265	+	.
	chr2	XieEtAlCTCF	exon	64277013	64277031	0.897	+	.
	chr2	XieEtAlCTCF	exon	64555249	64555267	0.8701	-	.
	chr2	XieEtAlCTCF	exon	64558174	64558192	0.8798	+	.
	chr2	XieEtAlCTCF	exon	64873644	64873663	0.8348	+	.
	chr2	XieEtAlCTCF	exon	65092863	65092882	0.8771	.	.
	chr2	XieEtAlCTCF	exon	65144938	65144957	0.8785	.	.
	chr2	XieEtAlCTCF	exon	65414567	65414585	0.913	-	.
	chr2	XieEtAlCTCF	exon	65492379	65492397	0.8241	+	.
	chr2	XieEtAlCTCF	exon	65780567	65780585	0.8165	-	.
	chr2	XieEtAlCTCF	exon	65800445	65800463	0.92	-	.
	chr2	XieEtAlCTCF	exon	65867827	65867845	0.8572	+	.
	chr2	XieEtAlCTCF	exon	66656326	66656344	0.9004	+	.
	chr2	XieEtAlCTCF	exon	66802617	66802635	0.8909	-	.
	chr2	XieEtAlCTCF	exon	67549969	67549987	0.8188	-	.
	chr2	XieEtAlCTCF	exon	68073766	68073785	0.818	.	.
	chr2	XieEtAlCTCF	exon	68258861	68258879	0.9254	-	.
	chr2	XieEtAlCTCF	exon	68349691	68349709	0.9253	+	.
	chr2	XieEtAlCTCF	exon	68423443	68423462	0.8589	+	.
	chr2	XieEtAlCTCF	exon	68510142	68510160	0.9065	-	.
	chr2	XieEtAlCTCF	exon	68589295	68589313	0.9042	+	.
	chr2	XieEtAlCTCF	exon	68669047	68669066	0.9053	-	.
	chr2	XieEtAlCTCF	exon	68690602	68690620	0.8721	+	.
	chr2	XieEtAlCTCF	exon	68715081	68715099	0.8657	+	.
	chr2	XieEtAlCTCF	exon	68936733	68936752	0.8688	+	.
	chr2	XieEtAlCTCF	exon	68979046	68979064	0.9649	+	.
	chr2	XieEtAlCTCF	exon	69066554	69066572	0.8194	+	.
	chr2	XieEtAlCTCF	exon	69534679	69534697	0.9206	-	.
	chr2	XieEtAlCTCF	exon	69787002	69787020	0.9054	+	.
	chr2	XieEtAlCTCF	exon	69941963	69941982	0.8701	-	.
	chr2	XieEtAlCTCF	exon	69951952	69951970	0.9014	+	.
	chr2	XieEtAlCTCF	exon	70139288	70139306	0.9486	+	.
	chr2	XieEtAlCTCF	exon	70844905	70844923	0.9268	-	.
	chr2	XieEtAlCTCF	exon	71175750	71175768	0.8219	-	.
	chr2	XieEtAlCTCF	exon	71228407	71228425	0.9793	-	.
	chr2	XieEtAlCTCF	exon	71384763	71384781	0.915	+	.
	chr2	XieEtAlCTCF	exon	71688123	71688141	0.8988	+	.
	chr2	XieEtAlCTCF	exon	71737519	71737538	0.8844	-	.
	chr2	XieEtAlCTCF	exon	71772994	71773012	0.9186	+	.
	chr2	XieEtAlCTCF	exon	71775949	71775968	0.8885	+	.
	chr2	XieEtAlCTCF	exon	71837252	71837270	0.9252	+	.
	chr2	XieEtAlCTCF	exon	72025639	72025658	0.826	-	.
	chr2	XieEtAlCTCF	exon	72029333	72029351	0.8745	+	.
	chr2	XieEtAlCTCF	exon	72151255	72151273	0.9538	+	.
	chr2	XieEtAlCTCF	exon	72222361	72222379	0.9596	-	.
	chr2	XieEtAlCTCF	exon	72377651	72377670	0.8304	-	.
	chr2	XieEtAlCTCF	exon	72553155	72553173	0.8943	.	.
	chr2	XieEtAlCTCF	exon	72806894	72806912	0.9135	-	.
	chr2	XieEtAlCTCF	exon	72833163	72833181	0.9033	-	.
	chr2	XieEtAlCTCF	exon	72973087	72973105	0.906	-	.
	chr2	XieEtAlCTCF	exon	72998182	72998200	0.9146	+	.
	chr2	XieEtAlCTCF	exon	73089828	73089846	0.9077	-	.
	chr2	XieEtAlCTCF	exon	73120927	73120945	0.812	+	.
	chr2	XieEtAlCTCF	exon	73200910	73200928	0.8154	-	.
	chr2	XieEtAlCTCF	exon	73220382	73220401	0.8657	+	.
	chr2	XieEtAlCTCF	exon	73312931	73312949	0.859	+	.
	chr2	XieEtAlCTCF	exon	73391064	73391082	0.952	-	.
	chr2	XieEtAlCTCF	exon	73404665	73404684	0.8238	-	.
	chr2	XieEtAlCTCF	exon	74814977	74814995	0.8905	.	.
	chr2	XieEtAlCTCF	exon	74942306	74942324	0.9122	+	.
	chr2	XieEtAlCTCF	exon	75103584	75103602	0.8921	-	.
	chr2	XieEtAlCTCF	exon	75147047	75147066	0.8686	.	.
	chr2	XieEtAlCTCF	exon	75292244	75292263	0.9335	+	.
	chr2	XieEtAlCTCF	exon	75855200	75855218	0.9587	-	.
	chr2	XieEtAlCTCF	exon	75867832	75867850	0.9406	+	.
	chr2	XieEtAlCTCF	exon	76014834	76014852	0.9372	+	.
	chr2	XieEtAlCTCF	exon	79206946	79206964	0.9471	-	.
	chr2	XieEtAlCTCF	exon	79446696	79446714	0.9113	-	.
	chr2	XieEtAlCTCF	exon	80115056	80115074	0.9628	-	.
	chr2	XieEtAlCTCF	exon	80163057	80163075	0.9215	+	.
	chr2	XieEtAlCTCF	exon	80163631	80163649	0.9136	-	.
	chr2	XieEtAlCTCF	exon	84542114	84542132	0.9587	-	.
	chr2	XieEtAlCTCF	exon	84651466	84651484	0.875	-	.
	chr2	XieEtAlCTCF	exon	84722846	84722865	0.8867	.	.
	chr2	XieEtAlCTCF	exon	85092464	85092482	0.9091	-	.
	chr2	XieEtAlCTCF	exon	85154306	85154324	0.9239	-	.
	chr2	XieEtAlCTCF	exon	85493769	85493787	0.9499	+	.
	chr2	XieEtAlCTCF	exon	85512763	85512781	0.9292	-	.
	chr2	XieEtAlCTCF	exon	85526073	85526091	0.9271	-	.
	chr2	XieEtAlCTCF	exon	85779369	85779387	0.9299	-	.
	chr2	XieEtAlCTCF	exon	85934522	85934540	0.953	-	.
	chr2	XieEtAlCTCF	exon	85956257	85956275	0.9347	+	.
	chr2	XieEtAlCTCF	exon	85977800	85977819	0.9052	.	.
	chr2	XieEtAlCTCF	exon	86041502	86041521	0.9478	-	.
	chr2	XieEtAlCTCF	exon	86054692	86054711	0.8493	+	.
	chr2	XieEtAlCTCF	exon	86992037	86992055	0.9133	+	.
	chr2	XieEtAlCTCF	exon	87456417	87456435	0.9421	+	.
	chr2	XieEtAlCTCF	exon	87795766	87795785	0.8226	.	.
	chr2	XieEtAlCTCF	exon	88360068	88360086	0.9075	+	.
	chr2	XieEtAlCTCF	exon	88459595	88459613	0.9802	-	.
	chr2	XieEtAlCTCF	exon	88491158	88491176	0.9645	+	.
	chr2	XieEtAlCTCF	exon	88969338	88969356	0.9082	-	.
	chr2	XieEtAlCTCF	exon	89039705	89039723	0.9126	+	.
	chr2	XieEtAlCTCF	exon	89131377	89131396	0.8891	+	.
	chr2	XieEtAlCTCF	exon	89454042	89454060	0.8423	-	.
	chr2	XieEtAlCTCF	exon	89572818	89572836	0.8589	-	.
	chr2	XieEtAlCTCF	exon	89948277	89948295	0.8589	+	.
	chr2	XieEtAlCTCF	exon	90066162	90066180	0.8423	+	.
	chr2	XieEtAlCTCF	exon	91672085	91672103	0.8291	+	.
	chr2	XieEtAlCTCF	exon	91815202	91815221	0.9349	+	.
	chr2	XieEtAlCTCF	exon	91947714	91947732	0.9099	+	.
	chr2	XieEtAlCTCF	exon	95897558	95897576	0.8801	+	.
	chr2	XieEtAlCTCF	exon	95989298	95989316	0.8928	+	.
	chr2	XieEtAlCTCF	exon	96688632	96688650	0.9218	+	.
	chr2	XieEtAlCTCF	exon	97220277	97220296	0.8708	.	.
	chr2	XieEtAlCTCF	exon	99001711	99001730	0.9033	-	.
	chr2	XieEtAlCTCF	exon	99029490	99029508	0.9596	+	.
	chr2	XieEtAlCTCF	exon	99453715	99453733	0.946	-	.
	chr2	XieEtAlCTCF	exon	99682652	99682670	0.9263	-	.
	chr2	XieEtAlCTCF	exon	100175716	100175735	0.8942	+	.
	chr2	XieEtAlCTCF	exon	100859572	100859590	0.8969	-	.
	chr2	XieEtAlCTCF	exon	100879497	100879516	0.8837	+	.
	chr2	XieEtAlCTCF	exon	100997819	100997838	0.8779	.	.
	chr2	XieEtAlCTCF	exon	101601494	101601513	0.8701	-	.
	chr2	XieEtAlCTCF	exon	101629292	101629310	0.9502	+	.
	chr2	XieEtAlCTCF	exon	101822185	101822203	0.9062	-	.
	chr2	XieEtAlCTCF	exon	101958822	101958841	0.8961	+	.
	chr2	XieEtAlCTCF	exon	102035693	102035711	0.9208	+	.
	chr2	XieEtAlCTCF	exon	102135545	102135563	0.8158	+	.
	chr2	XieEtAlCTCF	exon	102387310	102387328	0.8756	+	.
	chr2	XieEtAlCTCF	exon	102637248	102637266	0.9277	+	.
	chr2	XieEtAlCTCF	exon	102857457	102857475	0.9086	-	.
	chr2	XieEtAlCTCF	exon	103059880	103059898	0.8335	-	.
	chr2	XieEtAlCTCF	exon	103066027	103066045	0.9369	-	.
	chr2	XieEtAlCTCF	exon	103370203	103370221	0.9788	+	.
	chr2	XieEtAlCTCF	exon	103422894	103422912	0.9185	-	.
	chr2	XieEtAlCTCF	exon	103456564	103456582	0.8823	+	.
	chr2	XieEtAlCTCF	exon	103457886	103457905	0.9066	+	.
	chr2	XieEtAlCTCF	exon	105029036	105029054	0.9304	-	.
	chr2	XieEtAlCTCF	exon	105731127	105731145	0.8322	+	.
	chr2	XieEtAlCTCF	exon	105904367	105904385	0.9152	+	.
	chr2	XieEtAlCTCF	exon	105911531	105911549	0.8939	-	.
	chr2	XieEtAlCTCF	exon	105961642	105961660	0.9681	+	.
	chr2	XieEtAlCTCF	exon	106137839	106137857	0.8977	-	.
	chr2	XieEtAlCTCF	exon	106162372	106162390	0.865	-	.
	chr2	XieEtAlCTCF	exon	106192969	106192987	0.8617	+	.
	chr2	XieEtAlCTCF	exon	106721004	106721022	0.9017	+	.
	chr2	XieEtAlCTCF	exon	106865201	106865220	0.8978	+	.
	chr2	XieEtAlCTCF	exon	107189184	107189202	0.8968	-	.
	chr2	XieEtAlCTCF	exon	107254679	107254697	0.8349	+	.
	chr2	XieEtAlCTCF	exon	108532744	108532763	0.8978	+	.
	chr2	XieEtAlCTCF	exon	108553417	108553436	0.8872	+	.
	chr2	XieEtAlCTCF	exon	108786642	108786661	0.8894	-	.
	chr2	XieEtAlCTCF	exon	109200569	109200588	0.8919	-	.
	chr2	XieEtAlCTCF	exon	109252973	109252992	0.8631	.	.
	chr2	XieEtAlCTCF	exon	109471850	109471869	0.8806	+	.
	chr2	XieEtAlCTCF	exon	109545037	109545055	0.83	+	.
	chr2	XieEtAlCTCF	exon	110493991	110494010	0.8978	-	.
	chr2	XieEtAlCTCF	exon	110493991	110494010	0.8978	-	.
	chr2	XieEtAlCTCF	exon	111513277	111513295	0.8258	-	.
	chr2	XieEtAlCTCF	exon	111569499	111569517	0.9644	+	.
	chr2	XieEtAlCTCF	exon	111874763	111874781	0.8574	+	.
	chr2	XieEtAlCTCF	exon	112212152	112212171	0.8226	.	.
	chr2	XieEtAlCTCF	exon	112494062	112494080	0.9421	-	.
	chr2	XieEtAlCTCF	exon	112806542	112806560	0.8786	-	.
	chr2	XieEtAlCTCF	exon	112879429	112879448	0.8814	.	.
	chr2	XieEtAlCTCF	exon	113384272	113384290	0.9199	+	.
	chr2	XieEtAlCTCF	exon	113484468	113484487	0.9567	-	.
	chr2	XieEtAlCTCF	exon	113642667	113642685	0.9478	-	.
	chr2	XieEtAlCTCF	exon	113894631	113894649	0.8997	+	.
	chr2	XieEtAlCTCF	exon	113896145	113896163	0.9316	+	.
	chr2	XieEtAlCTCF	exon	114457929	114457947	0.8756	-	.
	chr2	XieEtAlCTCF	exon	118529985	118530004	0.9006	-	.
	chr2	XieEtAlCTCF	exon	118543478	118543496	0.9033	-	.
	chr2	XieEtAlCTCF	exon	118761090	118761109	0.8589	-	.
	chr2	XieEtAlCTCF	exon	118790157	118790175	0.9466	+	.
	chr2	XieEtAlCTCF	exon	118804401	118804420	0.8418	+	.
	chr2	XieEtAlCTCF	exon	118960474	118960492	0.9208	+	.
	chr2	XieEtAlCTCF	exon	118979753	118979772	0.8601	.	.
	chr2	XieEtAlCTCF	exon	119639297	119639316	0.9	+	.
	chr2	XieEtAlCTCF	exon	119640372	119640390	0.8613	+	.
	chr2	XieEtAlCTCF	exon	119932209	119932227	0.8882	-	.
	chr2	XieEtAlCTCF	exon	120048628	120048646	0.9746	-	.
	chr2	XieEtAlCTCF	exon	120417798	120417816	0.9569	-	.
	chr2	XieEtAlCTCF	exon	120460587	120460606	0.8515	+	.
	chr2	XieEtAlCTCF	exon	120511106	120511124	0.8918	+	.
	chr2	XieEtAlCTCF	exon	120932778	120932796	0.8162	.	.
	chr2	XieEtAlCTCF	exon	121070908	121070927	0.8673	-	.
	chr2	XieEtAlCTCF	exon	121194967	121194985	0.926	+	.
	chr2	XieEtAlCTCF	exon	121433284	121433303	0.8278	.	.
	chr2	XieEtAlCTCF	exon	121438027	121438046	0.9508	-	.
	chr2	XieEtAlCTCF	exon	121453341	121453359	0.8679	+	.
	chr2	XieEtAlCTCF	exon	121853028	121853046	0.9429	+	.
	chr2	XieEtAlCTCF	exon	122113827	122113845	0.8715	-	.
	chr2	XieEtAlCTCF	exon	122568995	122569013	0.9233	+	.
	chr2	XieEtAlCTCF	exon	124751486	124751504	0.8898	-	.
	chr2	XieEtAlCTCF	exon	127807899	127807917	0.9541	-	.
	chr2	XieEtAlCTCF	exon	127931950	127931968	0.9011	-	.
	chr2	XieEtAlCTCF	exon	127954683	127954701	0.9128	+	.
	chr2	XieEtAlCTCF	exon	129494346	129494364	0.908	+	.
	chr2	XieEtAlCTCF	exon	131911731	131911749	0.9068	+	.
	chr2	XieEtAlCTCF	exon	132170905	132170923	0.876	+	.
	chr2	XieEtAlCTCF	exon	132615953	132615971	0.8201	+	.
	chr2	XieEtAlCTCF	exon	133304854	133304872	0.94	+	.
	chr2	XieEtAlCTCF	exon	134318811	134318829	0.8888	-	.
	chr2	XieEtAlCTCF	exon	134537858	134537876	0.8556	.	.
	chr2	XieEtAlCTCF	exon	134644385	134644403	0.951	+	.
	chr2	XieEtAlCTCF	exon	134876001	134876019	0.941	+	.
	chr2	XieEtAlCTCF	exon	135223906	135223924	0.8979	-	.
	chr2	XieEtAlCTCF	exon	135655704	135655722	0.9089	-	.
	chr2	XieEtAlCTCF	exon	135761992	135762010	0.9273	+	.
	chr2	XieEtAlCTCF	exon	136673990	136674008	0.8719	+	.
	chr2	XieEtAlCTCF	exon	137136517	137136535	0.9626	-	.
	chr2	XieEtAlCTCF	exon	137181191	137181209	0.9361	+	.
	chr2	XieEtAlCTCF	exon	137632033	137632051	0.8657	+	.
	chr2	XieEtAlCTCF	exon	138596238	138596256	0.9893	-	.
	chr2	XieEtAlCTCF	exon	138623706	138623725	0.9128	.	.
	chr2	XieEtAlCTCF	exon	138646630	138646649	0.8478	+	.
	chr2	XieEtAlCTCF	exon	139131708	139131727	0.8461	-	.
	chr2	XieEtAlCTCF	exon	139544812	139544830	0.8902	-	.
	chr2	XieEtAlCTCF	exon	139585201	139585219	0.9229	-	.
	chr2	XieEtAlCTCF	exon	139680723	139680741	0.9387	+	.
	chr2	XieEtAlCTCF	exon	143738543	143738561	0.9294	-	.
	chr2	XieEtAlCTCF	exon	143747054	143747072	0.9291	-	.
	chr2	XieEtAlCTCF	exon	143792020	143792038	0.9685	+	.
	chr2	XieEtAlCTCF	exon	143792131	143792149	0.9178	+	.
	chr2	XieEtAlCTCF	exon	143868599	143868617	0.9107	+	.
	chr2	XieEtAlCTCF	exon	143980176	143980194	0.9303	-	.
	chr2	XieEtAlCTCF	exon	144017127	144017145	0.9895	-	.
	chr2	XieEtAlCTCF	exon	144444314	144444333	0.844	+	.
	chr2	XieEtAlCTCF	exon	147491818	147491836	0.8183	.	.
	chr2	XieEtAlCTCF	exon	147802795	147802813	0.9107	+	.
	chr2	XieEtAlCTCF	exon	147840621	147840639	0.8856	+	.
	chr2	XieEtAlCTCF	exon	148668697	148668715	0.9327	-	.
	chr2	XieEtAlCTCF	exon	149846598	149846616	0.9024	-	.
	chr2	XieEtAlCTCF	exon	149874084	149874102	0.9142	+	.
	chr2	XieEtAlCTCF	exon	150417985	150418003	0.9436	-	.
	chr2	XieEtAlCTCF	exon	150454237	150454255	0.8144	+	.
	chr2	XieEtAlCTCF	exon	152665010	152665029	0.8903	-	.
	chr2	XieEtAlCTCF	exon	152861424	152861442	0.9268	-	.
	chr2	XieEtAlCTCF	exon	152882267	152882285	0.8631	-	.
	chr2	XieEtAlCTCF	exon	152893552	152893570	0.8899	+	.
	chr2	XieEtAlCTCF	exon	153046589	153046607	0.8595	+	.
	chr2	XieEtAlCTCF	exon	153492362	153492380	0.9306	-	.
	chr2	XieEtAlCTCF	exon	153599703	153599721	0.8397	-	.
	chr2	XieEtAlCTCF	exon	154375978	154375997	0.967	-	.
	chr2	XieEtAlCTCF	exon	155480505	155480524	0.8748	+	.
	chr2	XieEtAlCTCF	exon	157446306	157446324	0.9248	-	.
	chr2	XieEtAlCTCF	exon	157749193	157749211	0.8896	-	.
	chr2	XieEtAlCTCF	exon	157912319	157912338	0.8367	.	.
	chr2	XieEtAlCTCF	exon	158050790	158050808	0.8737	-	.
	chr2	XieEtAlCTCF	exon	158159180	158159198	0.9677	+	.
	chr2	XieEtAlCTCF	exon	158348887	158348905	0.9058	+	.
	chr2	XieEtAlCTCF	exon	158454111	158454129	0.9098	-	.
	chr2	XieEtAlCTCF	exon	158634143	158634161	0.9148	+	.
	chr2	XieEtAlCTCF	exon	158866972	158866990	0.886	-	.
	chr2	XieEtAlCTCF	exon	159602316	159602334	0.8263	.	.
	chr2	XieEtAlCTCF	exon	159610707	159610725	0.9219	-	.
	chr2	XieEtAlCTCF	exon	159757958	159757976	0.9037	+	.
	chr2	XieEtAlCTCF	exon	159892726	159892745	0.9171	.	.
	chr2	XieEtAlCTCF	exon	159975273	159975291	0.9092	-	.
	chr2	XieEtAlCTCF	exon	160824997	160825015	0.8951	-	.
	chr2	XieEtAlCTCF	exon	160966635	160966653	0.9153	+	.
	chr2	XieEtAlCTCF	exon	161285942	161285960	0.8483	+	.
	chr2	XieEtAlCTCF	exon	161826930	161826948	0.8867	-	.
	chr2	XieEtAlCTCF	exon	161851096	161851114	0.9264	-	.
	chr2	XieEtAlCTCF	exon	162107534	162107552	0.923	+	.
	chr2	XieEtAlCTCF	exon	162129840	162129858	0.9417	-	.
	chr2	XieEtAlCTCF	exon	162283420	162283438	0.8492	+	.
	chr2	XieEtAlCTCF	exon	162803226	162803244	0.9199	-	.
	chr2	XieEtAlCTCF	exon	162864148	162864166	0.9026	+	.
	chr2	XieEtAlCTCF	exon	162980505	162980523	0.9721	-	.
	chr2	XieEtAlCTCF	exon	163077675	163077693	0.9331	+	.
	chr2	XieEtAlCTCF	exon	163154627	163154645	0.9176	-	.
	chr2	XieEtAlCTCF	exon	163157878	163157897	0.9026	-	.
	chr2	XieEtAlCTCF	exon	163190675	163190693	0.8721	-	.
	chr2	XieEtAlCTCF	exon	163747399	163747417	0.9819	+	.
	chr2	XieEtAlCTCF	exon	163989557	163989575	0.8675	-	.
	chr2	XieEtAlCTCF	exon	164011977	164011995	0.9211	+	.
	chr2	XieEtAlCTCF	exon	164039449	164039467	0.9163	+	.
	chr2	XieEtAlCTCF	exon	164048085	164048103	0.8938	+	.
	chr2	XieEtAlCTCF	exon	164917831	164917849	0.9031	-	.
	chr2	XieEtAlCTCF	exon	165573709	165573728	0.8199	-	.
	chr2	XieEtAlCTCF	exon	165594292	165594311	0.8879	+	.
	chr2	XieEtAlCTCF	exon	165849525	165849543	0.9244	+	.
	chr2	XieEtAlCTCF	exon	165871725	165871743	0.9359	+	.
	chr2	XieEtAlCTCF	exon	166257982	166258000	0.9049	+	.
	chr2	XieEtAlCTCF	exon	166731128	166731147	0.8682	.	.
	chr2	XieEtAlCTCF	exon	166984601	166984619	0.9595	-	.
	chr2	XieEtAlCTCF	exon	168975349	168975368	0.8595	.	.
	chr2	XieEtAlCTCF	exon	168976208	168976226	0.9464	-	.
	chr2	XieEtAlCTCF	exon	169615909	169615927	0.8936	-	.
	chr2	XieEtAlCTCF	exon	169818325	169818343	0.8628	+	.
	chr2	XieEtAlCTCF	exon	169988626	169988644	0.9743	-	.
	chr2	XieEtAlCTCF	exon	170308771	170308789	0.891	+	.
	chr2	XieEtAlCTCF	exon	170785095	170785113	0.9134	-	.
	chr2	XieEtAlCTCF	exon	171092649	171092668	0.8604	+	.
	chr2	XieEtAlCTCF	exon	171181253	171181271	0.9141	+	.
	chr2	XieEtAlCTCF	exon	171253760	171253778	0.9101	+	.
	chr2	XieEtAlCTCF	exon	171265735	171265753	0.911	+	.
	chr2	XieEtAlCTCF	exon	171669434	171669452	0.9562	-	.
	chr2	XieEtAlCTCF	exon	171729896	171729914	0.8496	-	.
	chr2	XieEtAlCTCF	exon	171830101	171830120	0.9422	+	.
	chr2	XieEtAlCTCF	exon	172272761	172272780	0.8653	.	.
	chr2	XieEtAlCTCF	exon	172430764	172430782	0.9022	+	.
	chr2	XieEtAlCTCF	exon	173326943	173326962	0.8401	-	.
	chr2	XieEtAlCTCF	exon	173330633	173330651	0.8647	-	.
	chr2	XieEtAlCTCF	exon	173349269	173349288	0.8283	.	.
	chr2	XieEtAlCTCF	exon	173458612	173458630	0.9364	+	.
	chr2	XieEtAlCTCF	exon	173538918	173538937	0.8244	.	.
	chr2	XieEtAlCTCF	exon	173575412	173575430	0.8963	-	.
	chr2	XieEtAlCTCF	exon	173671321	173671339	0.9207	+	.
	chr2	XieEtAlCTCF	exon	173729125	173729144	0.8715	.	.
	chr2	XieEtAlCTCF	exon	173796811	173796830	0.8692	-	.
	chr2	XieEtAlCTCF	exon	173892359	173892377	0.9498	+	.
	chr2	XieEtAlCTCF	exon	174267301	174267320	0.8884	+	.
	chr2	XieEtAlCTCF	exon	174749325	174749343	0.9576	+	.
	chr2	XieEtAlCTCF	exon	174904803	174904821	0.8999	-	.
	chr2	XieEtAlCTCF	exon	175022905	175022924	0.9393	.	.
	chr2	XieEtAlCTCF	exon	175387459	175387477	0.8349	-	.
	chr2	XieEtAlCTCF	exon	175636466	175636484	0.9464	+	.
	chr2	XieEtAlCTCF	exon	175850607	175850625	0.9076	-	.
	chr2	XieEtAlCTCF	exon	175901422	175901441	0.8706	.	.
	chr2	XieEtAlCTCF	exon	176068539	176068557	0.8887	+	.
	chr2	XieEtAlCTCF	exon	176116358	176116377	0.8744	+	.
	chr2	XieEtAlCTCF	exon	176174703	176174721	0.9218	+	.
	chr2	XieEtAlCTCF	exon	176555030	176555048	0.9162	+	.
	chr2	XieEtAlCTCF	exon	177005370	177005389	0.8743	+	.
	chr2	XieEtAlCTCF	exon	177319827	177319845	0.9078	-	.
	chr2	XieEtAlCTCF	exon	177419369	177419387	0.9359	-	.
	chr2	XieEtAlCTCF	exon	177517234	177517253	0.9439	-	.
	chr2	XieEtAlCTCF	exon	177518776	177518794	0.8293	-	.
	chr2	XieEtAlCTCF	exon	177679681	177679699	0.8799	-	.
	chr2	XieEtAlCTCF	exon	178013822	178013840	0.8934	-	.
	chr2	XieEtAlCTCF	exon	178029473	178029491	0.8924	+	.
	chr2	XieEtAlCTCF	exon	178160996	178161014	0.9119	-	.
	chr2	XieEtAlCTCF	exon	178197249	178197267	0.8569	-	.
	chr2	XieEtAlCTCF	exon	178199863	178199881	0.9504	+	.
	chr2	XieEtAlCTCF	exon	178281074	178281092	0.9152	-	.
	chr2	XieEtAlCTCF	exon	178354618	178354636	0.8712	+	.
	chr2	XieEtAlCTCF	exon	178589579	178589597	0.8915	.	.
	chr2	XieEtAlCTCF	exon	178637381	178637400	0.919	.	.
	chr2	XieEtAlCTCF	exon	178770989	178771007	0.9566	+	.
	chr2	XieEtAlCTCF	exon	178848104	178848122	0.9104	+	.
	chr2	XieEtAlCTCF	exon	178997197	178997216	0.898	.	.
	chr2	XieEtAlCTCF	exon	179626700	179626718	0.9355	+	.
	chr2	XieEtAlCTCF	exon	179756332	179756350	0.8462	+	.
	chr2	XieEtAlCTCF	exon	179779168	179779187	0.8961	-	.
	chr2	XieEtAlCTCF	exon	179994556	179994574	0.9245	-	.
	chr2	XieEtAlCTCF	exon	180083900	180083918	0.928	+	.
	chr2	XieEtAlCTCF	exon	180275795	180275813	0.9155	+	.
	chr2	XieEtAlCTCF	exon	180286950	180286968	0.9263	+	.
	chr2	XieEtAlCTCF	exon	180305565	180305583	0.9506	-	.
	chr2	XieEtAlCTCF	exon	180616105	180616123	0.8999	-	.
	chr2	XieEtAlCTCF	exon	180989160	180989178	0.9474	+	.
	chr2	XieEtAlCTCF	exon	181923538	181923556	0.9464	-	.
	chr2	XieEtAlCTCF	exon	181942040	181942058	0.9248	+	.
	chr2	XieEtAlCTCF	exon	181969424	181969442	0.9129	+	.
	chr2	XieEtAlCTCF	exon	182331548	182331567	0.9198	-	.
	chr2	XieEtAlCTCF	exon	182942555	182942574	0.921	-	.
	chr2	XieEtAlCTCF	exon	183649607	183649625	0.9431	+	.
	chr2	XieEtAlCTCF	exon	183844955	183844973	0.9201	-	.
	chr2	XieEtAlCTCF	exon	184113807	184113826	0.8953	.	.
	chr2	XieEtAlCTCF	exon	187121466	187121484	0.8928	-	.
	chr2	XieEtAlCTCF	exon	187506640	187506658	0.8971	-	.
	chr2	XieEtAlCTCF	exon	188317981	188317999	0.9046	-	.
	chr2	XieEtAlCTCF	exon	188362782	188362800	0.9468	+	.
	chr2	XieEtAlCTCF	exon	188364851	188364869	0.8596	+	.
	chr2	XieEtAlCTCF	exon	188445586	188445604	0.893	-	.
	chr2	XieEtAlCTCF	exon	189389433	189389452	0.9093	.	.
	chr2	XieEtAlCTCF	exon	189841579	189841597	0.8217	-	.
	chr2	XieEtAlCTCF	exon	189959206	189959224	0.9274	+	.
	chr2	XieEtAlCTCF	exon	190212351	190212370	0.8431	-	.
	chr2	XieEtAlCTCF	exon	190277264	190277282	0.9165	-	.
	chr2	XieEtAlCTCF	exon	190331581	190331599	0.8416	+	.
	chr2	XieEtAlCTCF	exon	190563148	190563166	0.9676	-	.
	chr2	XieEtAlCTCF	exon	190663639	190663657	0.8999	+	.
	chr2	XieEtAlCTCF	exon	190888767	190888785	0.925	+	.
	chr2	XieEtAlCTCF	exon	190953754	190953772	0.8764	+	.
	chr2	XieEtAlCTCF	exon	190986879	190986897	0.8888	-	.
	chr2	XieEtAlCTCF	exon	191646529	191646548	0.8794	+	.
	chr2	XieEtAlCTCF	exon	191715436	191715454	0.9173	+	.
	chr2	XieEtAlCTCF	exon	192030011	192030029	0.8918	+	.
	chr2	XieEtAlCTCF	exon	192386517	192386535	0.887	-	.
	chr2	XieEtAlCTCF	exon	192419988	192420006	0.9856	+	.
	chr2	XieEtAlCTCF	exon	192436004	192436022	0.8567	+	.
	chr2	XieEtAlCTCF	exon	192555849	192555867	0.9162	-	.
	chr2	XieEtAlCTCF	exon	192677031	192677050	0.868	.	.
	chr2	XieEtAlCTCF	exon	193027336	193027355	0.8854	-	.
	chr2	XieEtAlCTCF	exon	196441015	196441033	0.8955	+	.
	chr2	XieEtAlCTCF	exon	196525198	196525216	0.8571	-	.
	chr2	XieEtAlCTCF	exon	196803176	196803194	0.9161	-	.
	chr2	XieEtAlCTCF	exon	196943165	196943183	0.816	+	.
	chr2	XieEtAlCTCF	exon	197163027	197163045	0.9154	+	.
	chr2	XieEtAlCTCF	exon	197876950	197876968	0.9092	+	.
	chr2	XieEtAlCTCF	exon	197978120	197978139	0.8392	.	.
	chr2	XieEtAlCTCF	exon	198572511	198572529	0.8213	.	.
	chr2	XieEtAlCTCF	exon	198992559	198992577	0.9024	-	.
	chr2	XieEtAlCTCF	exon	199161581	199161599	0.9942	-	.
	chr2	XieEtAlCTCF	exon	199174576	199174594	0.8938	+	.
	chr2	XieEtAlCTCF	exon	199179471	199179490	0.9258	+	.
	chr2	XieEtAlCTCF	exon	200353704	200353722	0.8992	-	.
	chr2	XieEtAlCTCF	exon	200604717	200604735	0.9513	-	.
	chr2	XieEtAlCTCF	exon	200726073	200726091	0.8877	-	.
	chr2	XieEtAlCTCF	exon	200805378	200805396	0.8745	-	.
	chr2	XieEtAlCTCF	exon	201336202	201336220	0.9185	-	.
	chr2	XieEtAlCTCF	exon	201568059	201568078	0.8253	-	.
	chr2	XieEtAlCTCF	exon	201934189	201934207	0.9044	-	.
	chr2	XieEtAlCTCF	exon	202101269	202101287	0.9512	+	.
	chr2	XieEtAlCTCF	exon	202660789	202660808	0.8827	.	.
	chr2	XieEtAlCTCF	exon	203438744	203438763	0.9003	+	.
	chr2	XieEtAlCTCF	exon	204318770	204318788	0.8898	-	.
	chr2	XieEtAlCTCF	exon	204774578	204774597	0.8599	-	.
	chr2	XieEtAlCTCF	exon	204937334	204937353	0.8734	+	.
	chr2	XieEtAlCTCF	exon	204973159	204973177	0.872	+	.
	chr2	XieEtAlCTCF	exon	205010131	205010149	0.9032	+	.
	chr2	XieEtAlCTCF	exon	205124999	205125017	0.9051	+	.
	chr2	XieEtAlCTCF	exon	205190296	205190314	0.9179	+	.
	chr2	XieEtAlCTCF	exon	205556820	205556838	0.9014	-	.
	chr2	XieEtAlCTCF	exon	206540827	206540845	0.8529	-	.
	chr2	XieEtAlCTCF	exon	206544864	206544882	0.8977	-	.
	chr2	XieEtAlCTCF	exon	206631662	206631680	0.9235	+	.
	chr2	XieEtAlCTCF	exon	206750511	206750530	0.8366	.	.
	chr2	XieEtAlCTCF	exon	206790733	206790751	0.8761	-	.
	chr2	XieEtAlCTCF	exon	206812978	206812996	0.9739	-	.
	chr2	XieEtAlCTCF	exon	207029168	207029186	0.9506	+	.
	chr2	XieEtAlCTCF	exon	207421263	207421281	0.8889	+	.
	chr2	XieEtAlCTCF	exon	207558575	207558593	0.8906	+	.
	chr2	XieEtAlCTCF	exon	207665411	207665430	0.9049	.	.
	chr2	XieEtAlCTCF	exon	207846624	207846642	0.9247	+	.
	chr2	XieEtAlCTCF	exon	208339800	208339818	0.9534	-	.
	chr2	XieEtAlCTCF	exon	209040227	209040245	0.9258	+	.
	chr2	XieEtAlCTCF	exon	209238385	209238403	0.9508	+	.
	chr2	XieEtAlCTCF	exon	210842549	210842567	0.9314	+	.
	chr2	XieEtAlCTCF	exon	211060373	211060391	0.8944	-	.
	chr2	XieEtAlCTCF	exon	211064085	211064103	0.899	-	.
	chr2	XieEtAlCTCF	exon	211310030	211310048	0.9452	+	.
	chr2	XieEtAlCTCF	exon	211367909	211367927	0.9552	+	.
	chr2	XieEtAlCTCF	exon	211949977	211949996	0.87	+	.
	chr2	XieEtAlCTCF	exon	212320144	212320162	0.9293	+	.
	chr2	XieEtAlCTCF	exon	213432521	213432539	0.9705	-	.
	chr2	XieEtAlCTCF	exon	213459947	213459965	0.8655	+	.
	chr2	XieEtAlCTCF	exon	213551200	213551218	0.8219	+	.
	chr2	XieEtAlCTCF	exon	213641831	213641850	0.8253	+	.
	chr2	XieEtAlCTCF	exon	214018575	214018593	0.8401	-	.
	chr2	XieEtAlCTCF	exon	214111589	214111608	0.8597	.	.
	chr2	XieEtAlCTCF	exon	214116444	214116462	0.9179	+	.
	chr2	XieEtAlCTCF	exon	216134748	216134766	0.9294	-	.
	chr2	XieEtAlCTCF	exon	216319338	216319357	0.8346	.	.
	chr2	XieEtAlCTCF	exon	216785043	216785061	0.9081	-	.
	chr2	XieEtAlCTCF	exon	216796165	216796183	0.8824	-	.
	chr2	XieEtAlCTCF	exon	216887951	216887969	0.919	-	.
	chr2	XieEtAlCTCF	exon	217384073	217384092	0.8549	+	.
	chr2	XieEtAlCTCF	exon	217547364	217547383	0.8463	+	.
	chr2	XieEtAlCTCF	exon	218375653	218375672	0.8387	.	.
	chr2	XieEtAlCTCF	exon	218578387	218578405	0.8719	-	.
	chr2	XieEtAlCTCF	exon	218650361	218650379	0.891	+	.
	chr2	XieEtAlCTCF	exon	218751624	218751642	0.9468	-	.
	chr2	XieEtAlCTCF	exon	218764441	218764460	0.8484	.	.
	chr2	XieEtAlCTCF	exon	219033773	219033791	0.9687	+	.
	chr2	XieEtAlCTCF	exon	219051188	219051206	0.9098	+	.
	chr2	XieEtAlCTCF	exon	219122586	219122604	0.9224	-	.
	chr2	XieEtAlCTCF	exon	219137561	219137580	0.829	+	.
	chr2	XieEtAlCTCF	exon	219166173	219166191	0.9542	+	.
	chr2	XieEtAlCTCF	exon	219330961	219330979	0.8666	-	.
	chr2	XieEtAlCTCF	exon	219717735	219717754	0.9387	+	.
	chr2	XieEtAlCTCF	exon	219741511	219741529	0.891	+	.
	chr2	XieEtAlCTCF	exon	219763120	219763139	0.9074	-	.
	chr2	XieEtAlCTCF	exon	219844934	219844953	0.8718	+	.
	chr2	XieEtAlCTCF	exon	219860903	219860921	0.958	+	.
	chr2	XieEtAlCTCF	exon	219867357	219867376	0.8646	.	.
	chr2	XieEtAlCTCF	exon	219894574	219894592	0.9731	+	.
	chr2	XieEtAlCTCF	exon	219922882	219922900	0.9033	+	.
	chr2	XieEtAlCTCF	exon	219984345	219984363	0.8534	-	.
	chr2	XieEtAlCTCF	exon	220019951	220019969	0.9057	-	.
	chr2	XieEtAlCTCF	exon	220163586	220163605	0.8514	-	.
	chr2	XieEtAlCTCF	exon	220217342	220217360	0.8338	.	.
	chr2	XieEtAlCTCF	exon	220267824	220267842	0.9208	+	.
	chr2	XieEtAlCTCF	exon	220295673	220295692	0.8161	+	.
	chr2	XieEtAlCTCF	exon	220360269	220360287	0.897	+	.
	chr2	XieEtAlCTCF	exon	220395063	220395082	0.9388	-	.
	chr2	XieEtAlCTCF	exon	220507337	220507355	0.909	-	.
	chr2	XieEtAlCTCF	exon	220507398	220507416	0.9442	-	.
	chr2	XieEtAlCTCF	exon	220554585	220554603	0.9081	-	.
	chr2	XieEtAlCTCF	exon	220601104	220601122	0.876	+	.
	chr2	XieEtAlCTCF	exon	220918810	220918828	0.8975	+	.
	chr2	XieEtAlCTCF	exon	222922142	222922160	0.9635	+	.
	chr2	XieEtAlCTCF	exon	223426726	223426745	0.8633	-	.
	chr2	XieEtAlCTCF	exon	223573143	223573162	0.918	+	.
	chr2	XieEtAlCTCF	exon	223768530	223768548	0.9304	-	.
	chr2	XieEtAlCTCF	exon	223780056	223780074	0.9368	+	.
	chr2	XieEtAlCTCF	exon	223836596	223836614	0.888	+	.
	chr2	XieEtAlCTCF	exon	224324246	224324265	0.8641	+	.
	chr2	XieEtAlCTCF	exon	224835181	224835199	0.9314	+	.
	chr2	XieEtAlCTCF	exon	225149229	225149248	0.9012	.	.
	chr2	XieEtAlCTCF	exon	225515725	225515743	0.8479	.	.
	chr2	XieEtAlCTCF	exon	225866953	225866971	0.9262	-	.
	chr2	XieEtAlCTCF	exon	227667409	227667427	0.8874	-	.
	chr2	XieEtAlCTCF	exon	227850229	227850247	0.8815	-	.
	chr2	XieEtAlCTCF	exon	228103157	228103176	0.829	-	.
	chr2	XieEtAlCTCF	exon	228270981	228271000	0.8359	+	.
	chr2	XieEtAlCTCF	exon	228631197	228631215	0.9244	-	.
	chr2	XieEtAlCTCF	exon	228727123	228727141	0.9312	-	.
	chr2	XieEtAlCTCF	exon	228755394	228755412	0.9457	+	.
	chr2	XieEtAlCTCF	exon	230138634	230138652	0.8878	-	.
	chr2	XieEtAlCTCF	exon	230645663	230645681	0.9477	+	.
	chr2	XieEtAlCTCF	exon	230666057	230666075	0.9645	+	.
	chr2	XieEtAlCTCF	exon	230775658	230775676	0.8894	-	.
	chr2	XieEtAlCTCF	exon	230873067	230873085	0.8546	.	.
	chr2	XieEtAlCTCF	exon	231025056	231025074	0.95	-	.
	chr2	XieEtAlCTCF	exon	231476258	231476276	0.9587	-	.
	chr2	XieEtAlCTCF	exon	231663702	231663720	0.9495	-	.
	chr2	XieEtAlCTCF	exon	231689393	231689411	0.9497	+	.
	chr2	XieEtAlCTCF	exon	231852106	231852125	0.9399	-	.
	chr2	XieEtAlCTCF	exon	232316864	232316882	0.9562	-	.
	chr2	XieEtAlCTCF	exon	232422778	232422796	0.9007	-	.
	chr2	XieEtAlCTCF	exon	232466517	232466536	0.9123	-	.
	chr2	XieEtAlCTCF	exon	232477432	232477450	0.9369	+	.
	chr2	XieEtAlCTCF	exon	232539707	232539726	0.8312	.	.
	chr2	XieEtAlCTCF	exon	232542517	232542535	0.9041	+	.
	chr2	XieEtAlCTCF	exon	232552093	232552112	0.8786	+	.
	chr2	XieEtAlCTCF	exon	232580119	232580137	0.914	-	.
	chr2	XieEtAlCTCF	exon	232770953	232770971	0.9611	+	.
	chr2	XieEtAlCTCF	exon	233006951	233006970	0.9007	-	.
	chr2	XieEtAlCTCF	exon	233190904	233190923	0.9013	-	.
	chr2	XieEtAlCTCF	exon	233191982	233192000	0.9479	-	.
	chr2	XieEtAlCTCF	exon	233230451	233230469	0.8585	-	.
	chr2	XieEtAlCTCF	exon	233304360	233304379	0.9013	-	.
	chr2	XieEtAlCTCF	exon	233305435	233305453	0.9794	-	.
	chr2	XieEtAlCTCF	exon	233386970	233386988	0.9127	-	.
	chr2	XieEtAlCTCF	exon	233626210	233626229	0.8886	+	.
	chr2	XieEtAlCTCF	exon	233918829	233918848	0.9616	-	.
	chr2	XieEtAlCTCF	exon	234766283	234766302	0.9401	-	.
	chr2	XieEtAlCTCF	exon	235044479	235044497	0.8725	+	.
	chr2	XieEtAlCTCF	exon	235197738	235197757	0.8848	+	.
	chr2	XieEtAlCTCF	exon	235409253	235409271	0.8605	-	.
	chr2	XieEtAlCTCF	exon	235453746	235453764	0.9287	-	.
	chr2	XieEtAlCTCF	exon	235459350	235459368	0.8549	+	.
	chr2	XieEtAlCTCF	exon	236015948	236015967	0.8282	-	.
	chr2	XieEtAlCTCF	exon	236025729	236025747	0.8557	-	.
	chr2	XieEtAlCTCF	exon	236502873	236502891	0.9375	-	.
	chr2	XieEtAlCTCF	exon	236655148	236655166	0.8162	-	.
	chr2	XieEtAlCTCF	exon	236688241	236688259	0.9776	+	.
	chr2	XieEtAlCTCF	exon	237089693	237089712	0.8646	.	.
	chr2	XieEtAlCTCF	exon	237218375	237218393	0.8985	+	.
	chr2	XieEtAlCTCF	exon	237261874	237261893	0.8405	+	.
	chr2	XieEtAlCTCF	exon	237969587	237969606	0.904	.	.
	chr2	XieEtAlCTCF	exon	237981162	237981181	0.9339	-	.
	chr2	XieEtAlCTCF	exon	238330349	238330368	0.8642	+	.
	chr2	XieEtAlCTCF	exon	238380284	238380302	0.8608	+	.
	chr2	XieEtAlCTCF	exon	238421564	238421583	0.9386	+	.
	chr2	XieEtAlCTCF	exon	238480806	238480824	0.9431	-	.
	chr2	XieEtAlCTCF	exon	238653830	238653848	0.9802	-	.
	chr2	XieEtAlCTCF	exon	239165337	239165355	0.8452	+	.
	chr2	XieEtAlCTCF	exon	239693813	239693831	0.9348	-	.
	chr2	XieEtAlCTCF	exon	239892351	239892369	0.9681	-	.
	chr2	XieEtAlCTCF	exon	241000575	241000593	0.9287	+	.
	chr3	XieEtAlCTCF	exon	396223	396241	0.8984	-	.
	chr3	XieEtAlCTCF	exon	674450	674469	0.9373	+	.
	chr3	XieEtAlCTCF	exon	3057353	3057372	0.8819	.	.
	chr3	XieEtAlCTCF	exon	3212851	3212869	0.9405	-	.
	chr3	XieEtAlCTCF	exon	3242496	3242514	0.9155	+	.
	chr3	XieEtAlCTCF	exon	4040029	4040047	0.9111	-	.
	chr3	XieEtAlCTCF	exon	4392665	4392683	0.8363	+	.
	chr3	XieEtAlCTCF	exon	4675257	4675275	0.9176	-	.
	chr3	XieEtAlCTCF	exon	4697840	4697858	0.9047	+	.
	chr3	XieEtAlCTCF	exon	4753242	4753260	0.9171	+	.
	chr3	XieEtAlCTCF	exon	5068727	5068746	0.8695	-	.
	chr3	XieEtAlCTCF	exon	5099651	5099670	0.8463	.	.
	chr3	XieEtAlCTCF	exon	5347250	5347268	0.9068	+	.
	chr3	XieEtAlCTCF	exon	5468214	5468233	0.8672	.	.
	chr3	XieEtAlCTCF	exon	8153068	8153086	0.8889	-	.
	chr3	XieEtAlCTCF	exon	8343857	8343876	0.8733	-	.
	chr3	XieEtAlCTCF	exon	8459253	8459271	0.9515	-	.
	chr3	XieEtAlCTCF	exon	8483881	8483899	0.9255	+	.
	chr3	XieEtAlCTCF	exon	8705332	8705351	0.9099	.	.
	chr3	XieEtAlCTCF	exon	9012843	9012861	0.9385	+	.
	chr3	XieEtAlCTCF	exon	9344243	9344262	0.837	.	.
	chr3	XieEtAlCTCF	exon	9344437	9344456	0.8369	.	.
	chr3	XieEtAlCTCF	exon	9395031	9395049	0.9271	+	.
	chr3	XieEtAlCTCF	exon	9769086	9769104	0.9305	-	.
	chr3	XieEtAlCTCF	exon	10266778	10266796	0.8879	-	.
	chr3	XieEtAlCTCF	exon	10800426	10800444	0.946	+	.
	chr3	XieEtAlCTCF	exon	10925379	10925397	0.9765	-	.
	chr3	XieEtAlCTCF	exon	10987541	10987560	0.9397	+	.
	chr3	XieEtAlCTCF	exon	11102588	11102607	0.9272	+	.
	chr3	XieEtAlCTCF	exon	11376664	11376683	0.8613	.	.
	chr3	XieEtAlCTCF	exon	11693589	11693607	0.8435	.	.
	chr3	XieEtAlCTCF	exon	11845651	11845669	0.9168	-	.
	chr3	XieEtAlCTCF	exon	11876700	11876718	0.929	-	.
	chr3	XieEtAlCTCF	exon	12176716	12176734	0.8917	.	.
	chr3	XieEtAlCTCF	exon	12217535	12217553	0.9378	-	.
	chr3	XieEtAlCTCF	exon	12521528	12521546	0.8179	-	.
	chr3	XieEtAlCTCF	exon	13036632	13036651	0.8284	-	.
	chr3	XieEtAlCTCF	exon	13133826	13133844	0.9308	+	.
	chr3	XieEtAlCTCF	exon	13503265	13503283	0.903	-	.
	chr3	XieEtAlCTCF	exon	13537949	13537967	0.9276	+	.
	chr3	XieEtAlCTCF	exon	13689929	13689947	0.9144	-	.
	chr3	XieEtAlCTCF	exon	13699509	13699527	0.8947	+	.
	chr3	XieEtAlCTCF	exon	13927090	13927109	0.8262	-	.
	chr3	XieEtAlCTCF	exon	14245127	14245146	0.9147	.	.
	chr3	XieEtAlCTCF	exon	14302819	14302837	0.9812	+	.
	chr3	XieEtAlCTCF	exon	14509752	14509770	0.9124	-	.
	chr3	XieEtAlCTCF	exon	14550579	14550598	0.93	+	.
	chr3	XieEtAlCTCF	exon	15149764	15149783	0.8511	+	.
	chr3	XieEtAlCTCF	exon	15160307	15160326	0.8842	+	.
	chr3	XieEtAlCTCF	exon	15309619	15309637	0.9289	+	.
	chr3	XieEtAlCTCF	exon	15447120	15447139	0.9084	.	.
	chr3	XieEtAlCTCF	exon	15599096	15599114	0.9155	-	.
	chr3	XieEtAlCTCF	exon	15853892	15853910	0.8784	.	.
	chr3	XieEtAlCTCF	exon	16090373	16090391	0.8809	+	.
	chr3	XieEtAlCTCF	exon	16220014	16220033	0.9462	-	.
	chr3	XieEtAlCTCF	exon	16288985	16289003	0.9161	-	.
	chr3	XieEtAlCTCF	exon	16309749	16309767	0.94	+	.
	chr3	XieEtAlCTCF	exon	16331995	16332014	0.9138	+	.
	chr3	XieEtAlCTCF	exon	16592450	16592468	0.8293	-	.
	chr3	XieEtAlCTCF	exon	16642938	16642957	0.9325	+	.
	chr3	XieEtAlCTCF	exon	17300515	17300533	0.9356	+	.
	chr3	XieEtAlCTCF	exon	17349134	17349153	0.8442	+	.
	chr3	XieEtAlCTCF	exon	17454608	17454626	0.9754	-	.
	chr3	XieEtAlCTCF	exon	17686761	17686780	0.8364	+	.
	chr3	XieEtAlCTCF	exon	17882900	17882918	0.8511	-	.
	chr3	XieEtAlCTCF	exon	17947738	17947756	0.9028	+	.
	chr3	XieEtAlCTCF	exon	18020957	18020975	0.887	-	.
	chr3	XieEtAlCTCF	exon	18430795	18430813	0.9435	-	.
	chr3	XieEtAlCTCF	exon	18601056	18601075	0.8241	+	.
	chr3	XieEtAlCTCF	exon	19030299	19030317	0.8921	-	.
	chr3	XieEtAlCTCF	exon	19390611	19390629	0.9353	+	.
	chr3	XieEtAlCTCF	exon	19927060	19927078	0.8671	+	.
	chr3	XieEtAlCTCF	exon	20381988	20382006	0.891	+	.
	chr3	XieEtAlCTCF	exon	22159428	22159446	0.9015	-	.
	chr3	XieEtAlCTCF	exon	22217556	22217574	0.8758	+	.
	chr3	XieEtAlCTCF	exon	23930294	23930312	0.8741	+	.
	chr3	XieEtAlCTCF	exon	24040605	24040624	0.8309	+	.
	chr3	XieEtAlCTCF	exon	24227576	24227594	0.9391	+	.
	chr3	XieEtAlCTCF	exon	24279697	24279715	0.9272	-	.
	chr3	XieEtAlCTCF	exon	24306334	24306352	0.9304	+	.
	chr3	XieEtAlCTCF	exon	24722159	24722177	0.9479	+	.
	chr3	XieEtAlCTCF	exon	24725454	24725472	0.9417	-	.
	chr3	XieEtAlCTCF	exon	25482923	25482942	0.8822	+	.
	chr3	XieEtAlCTCF	exon	25574444	25574462	0.8952	+	.
	chr3	XieEtAlCTCF	exon	25635746	25635764	0.9134	-	.
	chr3	XieEtAlCTCF	exon	27175852	27175870	0.9159	+	.
	chr3	XieEtAlCTCF	exon	27509242	27509260	0.9193	-	.
	chr3	XieEtAlCTCF	exon	27700850	27700868	0.9314	-	.
	chr3	XieEtAlCTCF	exon	27722856	27722874	0.9347	-	.
	chr3	XieEtAlCTCF	exon	27753719	27753737	0.9083	+	.
	chr3	XieEtAlCTCF	exon	28376218	28376236	0.9474	-	.
	chr3	XieEtAlCTCF	exon	28517873	28517891	0.8949	+	.
	chr3	XieEtAlCTCF	exon	28709328	28709347	0.8873	+	.
	chr3	XieEtAlCTCF	exon	30054610	30054629	0.9117	+	.
	chr3	XieEtAlCTCF	exon	30083923	30083941	0.942	+	.
	chr3	XieEtAlCTCF	exon	30154571	30154589	0.8525	+	.
	chr3	XieEtAlCTCF	exon	30240774	30240793	0.9071	-	.
	chr3	XieEtAlCTCF	exon	30735193	30735211	0.8901	-	.
	chr3	XieEtAlCTCF	exon	30810394	30810412	0.9249	+	.
	chr3	XieEtAlCTCF	exon	30821359	30821378	0.8865	.	.
	chr3	XieEtAlCTCF	exon	31173845	31173863	0.9256	-	.
	chr3	XieEtAlCTCF	exon	31592355	31592373	0.9536	+	.
	chr3	XieEtAlCTCF	exon	31652382	31652400	0.9079	+	.
	chr3	XieEtAlCTCF	exon	31810440	31810458	0.9239	-	.
	chr3	XieEtAlCTCF	exon	32060744	32060762	0.8649	+	.
	chr3	XieEtAlCTCF	exon	32185787	32185805	0.9475	-	.
	chr3	XieEtAlCTCF	exon	32217290	32217308	0.8693	+	.
	chr3	XieEtAlCTCF	exon	32338377	32338395	0.9803	+	.
	chr3	XieEtAlCTCF	exon	32381768	32381786	0.8196	-	.
	chr3	XieEtAlCTCF	exon	32551786	32551804	0.872	+	.
	chr3	XieEtAlCTCF	exon	32706435	32706453	0.8721	-	.
	chr3	XieEtAlCTCF	exon	32775302	32775320	0.8867	+	.
	chr3	XieEtAlCTCF	exon	32989374	32989393	0.8815	+	.
	chr3	XieEtAlCTCF	exon	33116132	33116150	0.9639	-	.
	chr3	XieEtAlCTCF	exon	33173277	33173295	0.8992	+	.
	chr3	XieEtAlCTCF	exon	33414522	33414540	0.8543	-	.
	chr3	XieEtAlCTCF	exon	33925115	33925133	0.8915	+	.
	chr3	XieEtAlCTCF	exon	33957458	33957476	0.8183	+	.
	chr3	XieEtAlCTCF	exon	35701481	35701500	0.8821	.	.
	chr3	XieEtAlCTCF	exon	36007586	36007605	0.8369	+	.
	chr3	XieEtAlCTCF	exon	36742636	36742655	0.9007	.	.
	chr3	XieEtAlCTCF	exon	36910532	36910550	0.9655	-	.
	chr3	XieEtAlCTCF	exon	37821228	37821246	0.92	-	.
	chr3	XieEtAlCTCF	exon	37897047	37897065	0.9222	+	.
	chr3	XieEtAlCTCF	exon	38045023	38045041	0.8669	-	.
	chr3	XieEtAlCTCF	exon	38521514	38521532	0.9401	-	.
	chr3	XieEtAlCTCF	exon	38563065	38563083	0.9014	+	.
	chr3	XieEtAlCTCF	exon	38885587	38885605	0.9107	-	.
	chr3	XieEtAlCTCF	exon	39041606	39041624	0.9213	-	.
	chr3	XieEtAlCTCF	exon	39072484	39072502	0.9291	-	.
	chr3	XieEtAlCTCF	exon	40032246	40032264	0.9467	-	.
	chr3	XieEtAlCTCF	exon	40233540	40233558	0.8482	+	.
	chr3	XieEtAlCTCF	exon	40358734	40358753	0.847	.	.
	chr3	XieEtAlCTCF	exon	40622184	40622203	0.9039	+	.
	chr3	XieEtAlCTCF	exon	40626205	40626223	0.9366	+	.
	chr3	XieEtAlCTCF	exon	41244665	41244683	0.9055	-	.
	chr3	XieEtAlCTCF	exon	41922914	41922932	0.8961	-	.
	chr3	XieEtAlCTCF	exon	41935667	41935685	0.8746	+	.
	chr3	XieEtAlCTCF	exon	42141462	42141480	0.9396	-	.
	chr3	XieEtAlCTCF	exon	42232816	42232834	0.9091	-	.
	chr3	XieEtAlCTCF	exon	42271522	42271540	0.9208	+	.
	chr3	XieEtAlCTCF	exon	42289158	42289176	0.8784	.	.
	chr3	XieEtAlCTCF	exon	42485499	42485517	0.9493	-	.
	chr3	XieEtAlCTCF	exon	42581559	42581577	0.8693	-	.
	chr3	XieEtAlCTCF	exon	42589098	42589116	0.9157	-	.
	chr3	XieEtAlCTCF	exon	42822494	42822512	0.9325	+	.
	chr3	XieEtAlCTCF	exon	43544752	43544770	0.8568	-	.
	chr3	XieEtAlCTCF	exon	43585869	43585887	0.9111	+	.
	chr3	XieEtAlCTCF	exon	43811102	43811120	0.9039	+	.
	chr3	XieEtAlCTCF	exon	43897346	43897364	0.8144	+	.
	chr3	XieEtAlCTCF	exon	44240311	44240329	0.8907	-	.
	chr3	XieEtAlCTCF	exon	44277620	44277638	0.9132	-	.
	chr3	XieEtAlCTCF	exon	45252220	45252239	0.9279	.	.
	chr3	XieEtAlCTCF	exon	45541204	45541222	0.8665	-	.
	chr3	XieEtAlCTCF	exon	45698443	45698462	0.8932	.	.
	chr3	XieEtAlCTCF	exon	45802790	45802808	0.9159	+	.
	chr3	XieEtAlCTCF	exon	45980438	45980456	0.9657	+	.
	chr3	XieEtAlCTCF	exon	46410284	46410302	0.8884	-	.
	chr3	XieEtAlCTCF	exon	46420031	46420049	0.8942	.	.
	chr3	XieEtAlCTCF	exon	46746671	46746690	0.8514	.	.
	chr3	XieEtAlCTCF	exon	46890127	46890145	0.9064	+	.
	chr3	XieEtAlCTCF	exon	46908407	46908426	0.8914	+	.
	chr3	XieEtAlCTCF	exon	46936854	46936873	0.8324	-	.
	chr3	XieEtAlCTCF	exon	46951204	46951222	0.9572	-	.
	chr3	XieEtAlCTCF	exon	47365939	47365957	0.8265	.	.
	chr3	XieEtAlCTCF	exon	47412842	47412860	0.9357	-	.
	chr3	XieEtAlCTCF	exon	47563758	47563776	0.9494	+	.
	chr3	XieEtAlCTCF	exon	48031623	48031641	0.973	-	.
	chr3	XieEtAlCTCF	exon	48236090	48236108	0.9237	+	.
	chr3	XieEtAlCTCF	exon	48477593	48477612	0.9315	-	.
	chr3	XieEtAlCTCF	exon	48586343	48586361	0.9685	-	.
	chr3	XieEtAlCTCF	exon	49195715	49195733	0.911	-	.
	chr3	XieEtAlCTCF	exon	49577254	49577273	0.835	+	.
	chr3	XieEtAlCTCF	exon	49709308	49709326	0.8956	-	.
	chr3	XieEtAlCTCF	exon	49741053	49741071	0.8589	+	.
	chr3	XieEtAlCTCF	exon	49876816	49876835	0.8547	-	.
	chr3	XieEtAlCTCF	exon	49943906	49943924	0.928	-	.
	chr3	XieEtAlCTCF	exon	50159154	50159172	0.9961	+	.
	chr3	XieEtAlCTCF	exon	50226909	50226928	0.8607	.	.
	chr3	XieEtAlCTCF	exon	50283790	50283809	0.8824	-	.
	chr3	XieEtAlCTCF	exon	50473674	50473693	0.9133	+	.
	chr3	XieEtAlCTCF	exon	50580046	50580064	0.9746	-	.
	chr3	XieEtAlCTCF	exon	50587711	50587729	0.9103	-	.
	chr3	XieEtAlCTCF	exon	50651684	50651702	0.9009	-	.
	chr3	XieEtAlCTCF	exon	50690370	50690388	0.9225	-	.
	chr3	XieEtAlCTCF	exon	51409571	51409590	0.891	-	.
	chr3	XieEtAlCTCF	exon	51536232	51536250	0.9611	+	.
	chr3	XieEtAlCTCF	exon	51753301	51753319	0.9442	+	.
	chr3	XieEtAlCTCF	exon	52178472	52178490	0.9194	-	.
	chr3	XieEtAlCTCF	exon	52254611	52254629	0.9246	+	.
	chr3	XieEtAlCTCF	exon	52462720	52462738	0.904	+	.
	chr3	XieEtAlCTCF	exon	52481213	52481231	0.8966	-	.
	chr3	XieEtAlCTCF	exon	52506147	52506165	0.9023	+	.
	chr3	XieEtAlCTCF	exon	53106849	53106867	0.9483	-	.
	chr3	XieEtAlCTCF	exon	53148115	53148133	0.9484	+	.
	chr3	XieEtAlCTCF	exon	53168894	53168912	0.9159	+	.
	chr3	XieEtAlCTCF	exon	53333746	53333764	0.9214	+	.
	chr3	XieEtAlCTCF	exon	53409213	53409231	0.8133	.	.
	chr3	XieEtAlCTCF	exon	53703097	53703115	0.8765	+	.
	chr3	XieEtAlCTCF	exon	53744373	53744391	0.8921	-	.
	chr3	XieEtAlCTCF	exon	53972850	53972868	0.9036	+	.
	chr3	XieEtAlCTCF	exon	54180846	54180864	0.9071	+	.
	chr3	XieEtAlCTCF	exon	54462487	54462505	0.9122	+	.
	chr3	XieEtAlCTCF	exon	54864888	54864906	0.9293	+	.
	chr3	XieEtAlCTCF	exon	54888019	54888037	0.8665	+	.
	chr3	XieEtAlCTCF	exon	55215161	55215179	0.9037	-	.
	chr3	XieEtAlCTCF	exon	55519284	55519302	0.922	+	.
	chr3	XieEtAlCTCF	exon	56285562	56285580	0.9623	-	.
	chr3	XieEtAlCTCF	exon	56374701	56374719	0.9478	+	.
	chr3	XieEtAlCTCF	exon	56528927	56528945	0.8691	-	.
	chr3	XieEtAlCTCF	exon	56736709	56736727	0.9349	+	.
	chr3	XieEtAlCTCF	exon	57023100	57023119	0.9456	-	.
	chr3	XieEtAlCTCF	exon	57029615	57029633	0.8612	+	.
	chr3	XieEtAlCTCF	exon	57134310	57134328	0.9253	+	.
	chr3	XieEtAlCTCF	exon	57213795	57213814	0.8153	.	.
	chr3	XieEtAlCTCF	exon	57838815	57838833	0.8611	-	.
	chr3	XieEtAlCTCF	exon	58173608	58173627	0.8587	.	.
	chr3	XieEtAlCTCF	exon	58203079	58203098	0.852	-	.
	chr3	XieEtAlCTCF	exon	58518651	58518669	0.9498	-	.
	chr3	XieEtAlCTCF	exon	58554478	58554497	0.9626	+	.
	chr3	XieEtAlCTCF	exon	58616024	58616042	0.9118	-	.
	chr3	XieEtAlCTCF	exon	58626522	58626540	0.8327	.	.
[truncated: 7,780 more rows]

## Sheet: SuppTable3-MNase-seq & NOMe-seq
	MNase-seq	NOMe-seq
Input Material	> 1 million cells	<1 million cells
Fragmentation Method	Cutting at A/T dinucleotides not protected by nucleosomes	Shearing of naked DNA
Footprinting Method	Nuclease	Methyltransferase
Nucleosome Measurement	Read Enrichment	Ratio of reads that are accessible
Endogenous Methylation Information	No	Yes
Library Preparation	Standard ChIP-seq library prep	Standard Whole Genome Bisulfite Sequencing library prep
Size Exclusion	Mononucleosomes	Optional
Recommended Coverage	~20 Gb	~55 Gb

## Sheet: SuppTable4-GBM QC metrics
	units	157-NS	157-NS	248-NS	248-NS		157-NS	248-NS
Flow Cell		D09AYACXX	DOECCACXX	D09AYACXX	DOECCACXX		merged	merged
Total reads	millions of reads	345.216	355.008	345.792	385.344		700.224	731.136
PF (pass fail) reads	millions of reads	310.272	290.784	312.678	301.44		601.056	614.118
Mapped reads (BSMAP)	millions of reads	308.08	279.154	310.713	290.763		587.234	601.476
* Properly paired	millions of reads	243.53	218.291	255.702	236.263		461.821	491.965
Percent of PF reads properly paired	percent	0.784892	0.750698	0.817781	0.783781		0.768349	0.801092
Inverted repeats	millions of reads	20.05	15.088	18.557	14.641		35.138	33.198
Dups	millions of reads	7.051	6.232	5.041	4.608		13.283	9.649
Paired reads mapping to different chroms	millions of reads	10.93	5.907	10.21	6.112		16.837	16.322
Mean insert size	base pairs	270.39	268.804	252.14	249.728		269.597	250.934
# cycles (PE)	base pairs	50	100	50	100
* bp used for analysis	gigabases	12.1765	21.8291	12.7851	23.6263		34.0056	36.4114
* average coverage	reads per bp	4.59491	8.2374	4.82457	8.91558		12.8323	13.7402
** Only properly paired reads used in downstream analysis

## Sheet: SuppTable5-TSS-NS157-NDRs
All	chr	start	end	FDR<0.01	FDR	raw_p_value	GCH_methylation_in_window	GCH_methylation_in_adjacent_4kb_window	GCH_data_point_in_window	GCH_number_in_window	GCH_reads_depth_in_window	GCH_CT_reads_depth_in_window
Coordinates	chr1	569433	569582	TRUE	0	0	0.878259	0.373432	1092	15	167	72
hg19	chr5	70073978	70074127	TRUE	0	0	0.363636	0	13	11	2	1
	chr9	84547116	84547265	TRUE	0	0	0.125	0	17	12	2	1
	chr16	22502962	22503111	TRUE	0	0	0.0583333	0	28	10	2	2
	chr7	102553352	102553501	TRUE	2.74161e-131	3.94e-135	0.845679	0.126184	232	23	20	10
Includes all	chr1	564939	565088	TRUE	7.36431e-124	1.27e-127	0.633998	0.142266	256	15	35	17
UCSC genes	chr4	74088737	74088886	TRUE	1.71972e-89	3.46e-93	0.831703	0.107787	152	22	13	6
with 10 or	chr4	71587598	71587747	TRUE	2.18755e-85	5.03e-89	0.709119	0.107017	184	23	15	8
more GCH	chr7	112758589	112758738	TRUE	1.92516e-75	4.98e-79	0.874311	0.107525	114	19	11	6
datapoints.	chr21	30517800	30517949	TRUE	5.01005e-67	1.44e-70	0.74871	0.147159	176	21	17	8
Those called	chr9	134955205	134955354	TRUE	1.17028e-66	3.7e-70	0.713141	0.139705	175	26	12	6
as NDRs in the	chr7	75157370	75157519	TRUE	7.71223e-65	2.66e-68	0.899094	0.184542	136	29	9	4
paper had FDR	chr8	67974523	67974672	TRUE	5.05822e-63	1.89e-66	0.756371	0.0992418	116	18	12	6
adjusted	chr2	166326057	166326206	TRUE	1.20529e-61	4.85e-65	0.737406	0.079154	109	19	11	5
p-value<0.01	chr8	125462948	125463097	TRUE	2.15015e-61	9.27e-65	0.802463	0.125	123	29	8	4
	chr4	122722372	122722521	TRUE	1.06985e-60	4.92e-64	0.842447	0.124809	113	29	7	3
	chr17	16557110	16557259	TRUE	1.62499e-57	7.94e-61	0.858081	0.125203	98	33	6	2
	chr14	91580257	91580406	TRUE	1.75893e-57	9.1e-61	0.910088	0.138456	90	38	4	2
	chr7	6616999	6617148	TRUE	3.90037e-57	2.13e-60	0.921062	0.155341	97	26	7	3
	chr7	30323823	30323972	TRUE	5.01005e-57	2.88e-60	0.792381	0.0956773	106	25	8	4
	chr14	72052898	72053047	TRUE	2.98217e-56	1.8e-59	0.65553	0.117848	153	31	9	4
	chr7	104909429	104909578	TRUE	8.60311e-56	5.44e-59	0.61698	0.104018	196	17	22	11
	chr1	147400406	147400555	TRUE	3.46407e-55	2.29e-58	0.782828	0.0999644	92	33	5	2
	chr1	219347092	219347241	TRUE	1.24834e-54	8.97e-58	0.759804	0.0836039	97	34	5	2
	chr9	127177673	127177822	TRUE	1.24834e-54	8.65e-58	0.859179	0.111429	88	23	7	3
	chr14	39583388	39583537	TRUE	2.23472e-54	1.67e-57	0.73489	0.0772533	105	26	7	4
	chr8	67974514	67974663	TRUE	7.92484e-54	6.15e-57	0.745362	0.0992418	102	16	12	6
	chr4	147096781	147096930	TRUE	1.7893e-53	1.44e-56	0.732857	0.0831314	117	35	6	3
	chr7	92747274	92747423	TRUE	3.38642e-53	2.86e-56	0.616605	0.0789772	145	12	23	12
	chr7	129845290	129845439	TRUE	3.38642e-53	2.92e-56	0.813941	0.169923	127	21	12	6
	chr7	6616984	6617133	TRUE	1.48147e-52	1.32e-55	0.936853	0.155483	84	23	7	3
	chr7	86781628	86781777	TRUE	1.78309e-52	1.64e-55	0.955556	0.116096	64	30	3	2
	chr21	40752170	40752319	TRUE	7.7913e-52	7.39e-55	0.896978	0.151385	97	26	7	3
	chr11	47270315	47270464	TRUE	9.445e-52	9.23e-55	0.882738	0.145386	93	28	6	3
	chr17	38975274	38975423	TRUE	3.39968e-51	3.42e-54	0.979885	0.138356	68	29	3	2
	chr11	14521309	14521458	TRUE	8.91062e-51	9.22e-54	0.866286	0.122867	85	25	6	3
	chr7	129691185	129691334	TRUE	9.49728e-51	1.01e-53	0.760198	0.1201	104	20	11	5
	chr5	125936533	125936682	TRUE	1.19025e-50	1.3e-53	0.905172	0.123431	75	29	4	2
	chr7	75157346	75157495	TRUE	1.33815e-50	1.5e-53	0.79159	0.179067	134	32	8	4
	chr11	76155642	76155791	TRUE	1.40908e-50	1.62e-53	0.916667	0.128041	74	23	5	3
	chr19	14530123	14530272	TRUE	2.21481e-50	2.61e-53	0.870513	0.180834	95	26	7	3
	chr7	76829102	76829251	TRUE	5.49217e-50	6.63e-53	0.521443	0.115797	244	29	16	8
	chr7	116660172	116660321	TRUE	8.17207e-50	1.01e-52	0.665918	0.0970334	126	35	7	3
	chr9	95640242	95640391	TRUE	1.0833e-49	1.37e-52	0.717391	0.0872536	96	23	8	4
	chr5	147162204	147162353	TRUE	5.35797e-49	6.93e-52	0.797059	0.161976	114	34	6	3
	chr7	89975890	89976039	TRUE	7.01891e-49	9.28e-52	0.716896	0.126369	119	26	9	4
	chr8	30945060	30945209	TRUE	8.14281e-49	1.1e-51	0.501525	0.0916606	204	22	18	9
	chr7	103848415	103848564	TRUE	8.48055e-49	1.17e-51	0.927619	0.142715	71	25	5	2
	chr7	64363531	64363680	TRUE	2.36444e-48	3.33e-51	0.773803	0.125656	113	23	9	4
	chr1	145039894	145040043	TRUE	2.69986e-48	3.88e-51	0.797835	0.164056	123	33	7	3
	chr7	11013416	11013565	TRUE	3.71338e-48	5.55e-51	0.70754	0.181214	153	27	11	5
	chr9	136242922	136243071	TRUE	3.71338e-48	5.55e-51	0.97619	0.170617	77	33	4	2
	chr2	85822737	85822886	TRUE	1.05032e-47	1.6e-50	0.913978	0.146969	73	31	4	2
	chr7	16685350	16685499	TRUE	1.24993e-47	1.94e-50	0.927381	0.230336	97	28	6	3
	chr11	14521350	14521499	TRUE	1.42331e-47	2.25e-50	0.746798	0.148674	100	29	6	3
	chr6	37321648	37321797	TRUE	1.5967e-47	2.57e-50	0.833333	0.0934275	76	26	5	2
	chr7	25164907	25165056	TRUE	2.08142e-47	3.41e-50	0.859844	0.169123	112	26	8	4
	chr12	104680627	104680776	TRUE	3.83912e-47	6.4e-50	0.910494	0.116666	69	27	4	2
	chr15	76603762	76603911	TRUE	4.03587e-47	6.87e-50	0.838542	0.12443	73	32	4	2
	chr16	8814473	8814622	TRUE	4.03587e-47	6.96e-50	0.819345	0.126253	103	28	7	3
	chr1	28764561	28764710	TRUE	6.04582e-47	1.06e-49	0.765357	0.13097	90	20	9	4
	chr1	24018194	24018343	TRUE	7.91237e-47	1.41e-49	0.797222	0.122747	91	24	7	3
	chr7	133812005	133812154	TRUE	1.62363e-46	2.94e-49	0.836275	0.0750346	71	17	8	4
	chr8	66556874	66557023	TRUE	1.73425e-46	3.24e-49	0.904938	0.164229	89	27	4	3
	chr20	40247085	40247234	TRUE	1.73425e-46	3.23e-49	0.783245	0.173425	110	27	8	4
	chr16	11439211	11439360	TRUE	2.56196e-46	4.86e-49	0.942143	0.117029	74	25	5	2
	chr4	73177924	73178073	TRUE	4.91242e-46	9.46e-49	0.773333	0.0764354	66	15	8	4
	chr21	48024987	48025136	TRUE	6.85607e-46	1.34e-48	0.887738	0.194558	101	30	6	3
	chr7	66767358	66767507	TRUE	6.90798e-46	1.37e-48	0.902801	0.138261	75	17	8	4
	chr8	99057725	99057874	TRUE	9.54295e-46	1.92e-48	0.96875	0.0921577	51	24	4	2
	chr1	183774154	183774303	TRUE	1.08725e-45	2.24e-48	0.82	0.0912682	57	25	3	2
	chr6	44355202	44355351	TRUE	1.08725e-45	2.25e-48	0.714175	0.0893462	89	18	10	4
	chr7	64363520	64363669	TRUE	1.76279e-45	3.74e-48	0.785594	0.125656	104	21	9	4
	chr7	90032696	90032845	TRUE	1.76279e-45	3.8e-48	0.730442	0.0964846	99	21	10	4
	chr11	114310077	114310226	TRUE	1.76279e-45	3.78e-48	0.846154	0.0855927	61	26	4	2
	chr1	109618576	109618725	TRUE	1.76707e-45	3.86e-48	0.809375	0.11206	79	32	4	2
	chr12	2045652	2045801	TRUE	2.68847e-45	5.95e-48	0.762366	0.106429	99	31	6	3
	chr10	56561003	56561152	TRUE	2.76998e-45	6.21e-48	0.756031	0.163268	127	29	9	4
	chr11	14521325	14521474	TRUE	5.63718e-45	1.28e-47	0.843789	0.139005	84	23	7	3
	chr5	133747541	133747690	TRUE	6.61048e-45	1.52e-47	0.966667	0.155289	61	30	3	2
	chr7	99746430	99746579	TRUE	6.6614e-45	1.56e-47	0.766412	0.166838	133	28	9	4
	chr8	92082276	92082425	TRUE	6.6614e-45	1.57e-47	0.876437	0.108379	70	29	4	2
	chr11	75110462	75110611	TRUE	9.09622e-45	2.17e-47	0.925	0.118284	58	20	5	2
	chr7	23636898	23637047	TRUE	1.0976e-44	2.65e-47	0.773104	0.122199	95	27	7	3
	chr1	184020711	184020860	TRUE	1.43261e-44	3.5e-47	0.886538	0.125144	72	26	5	2
	chr7	23338840	23338989	TRUE	1.51305e-44	3.74e-47	0.948909	0.15373	68	24	5	2
	chr12	6772260	6772409	TRUE	2.46743e-44	6.17e-47	0.828655	0.0733631	65	19	7	3
	chr9	117349894	117350043	TRUE	3.33292e-44	8.43e-47	0.906136	0.15759	88	26	6	3
	chr7	5553385	5553534	TRUE	3.36192e-44	8.6e-47	0.760417	0.126656	94	24	7	3
	chr9	116172904	116173053	TRUE	3.67249e-44	9.5e-47	0.847253	0.203956	122	26	8	4
	chr19	4182548	4182697	TRUE	9.29061e-44	2.43e-46	0.943182	0.135921	63	22	5	2
	chr9	140513344	140513493	TRUE	1.09292e-43	2.89e-46	0.892708	0.167661	90	32	6	2
	chr7	44240478	44240627	TRUE	1.22707e-43	3.28e-46	0.815333	0.133951	77	25	5	3
	chr14	69864973	69865122	TRUE	1.41019e-43	3.81e-46	0.688605	0.139185	121	28	8	4
	chr15	75182310	75182459	TRUE	3.55245e-43	9.7e-46	0.94	0.166347	69	25	5	2
	chr22	41763359	41763508	TRUE	4.09531e-43	1.13e-45	1	0.178187	60	21	2	2
	chr1	173683980	173684129	TRUE	4.19656e-43	1.17e-45	0.87026	0.0874457	66	18	7	3
	chr5	169010538	169010687	TRUE	4.33125e-43	1.22e-45	0.685256	0.113862	97	26	7	3
	chr7	97736097	97736246	TRUE	8.15328e-43	2.32e-45	0.714667	0.109447	92	25	7	3
	chr7	64467073	64467222	TRUE	8.21091e-43	2.36e-45	0.872487	0.189368	88	21	8	4
	chr12	7013852	7014001	TRUE	1.0851e-42	3.15e-45	0.941296	0.122207	65	15	8	4
	chr12	82752151	82752300	TRUE	1.23477e-42	3.62e-45	0.944444	0.122136	54	24	4	2
	chr1	151319721	151319870	TRUE	1.3415e-42	4.01e-45	0.798214	0.142643	93	28	6	3
	chr12	10766135	10766284	TRUE	1.3415e-42	3.98e-45	0.769785	0.130751	86	21	8	4
	chr7	64023436	64023585	TRUE	1.38174e-42	4.17e-45	0.848085	0.152242	92	23	8	4
	chr10	1034249	1034398	TRUE	1.74288e-42	5.31e-45	0.869048	0.139813	75	21	6	3
	chr10	104535788	104535937	TRUE	2.02249e-42	6.22e-45	0.972222	0.123423	54	21	4	2
	chr7	107384486	107384635	TRUE	2.93799e-42	9.12e-45	0.894066	0.248824	108	22	10	4
	chr1	223101683	223101832	TRUE	3.4792e-42	1.09e-44	0.630247	0.112377	122	27	9	4
	chr11	125773057	125773206	TRUE	4.14341e-42	1.31e-44	0.897857	0.117082	67	20	6	3
	chr21	34915250	34915399	TRUE	4.76431e-42	1.52e-44	0.91576	0.256084	102	21	9	4
	chr7	131012538	131012687	TRUE	5.29577e-42	1.72e-44	0.972222	0.130832	55	30	3	1
	chr19	58790126	58790275	TRUE	5.29577e-42	1.72e-44	0.9	0.130086	70	30	4	2
	chr7	139876693	139876842	TRUE	6.31749e-42	2.07e-44	0.927928	0.241145	87	37	4	2
	chr3	113775511	113775660	TRUE	9.34846e-42	3.09e-44	0.808696	0.188405	103	23	8	4
	chr19	41220930	41221079	TRUE	1.66162e-41	5.54e-44	0.88172	0.0896027	56	31	3	1
	chr9	139377459	139377608	TRUE	1.82216e-41	6.18e-44	0.958333	0.140036	61	26	4	2
	chr19	44716591	44716740	TRUE	1.82216e-41	6.17e-44	0.965986	0.0982159	50	14	6	3
	chr3	113775412	113775561	TRUE	2.03197e-41	6.95e-44	0.748724	0.15708	110	28	7	3
	chr7	5553351	5553500	TRUE	2.1594e-41	7.51e-44	0.780128	0.107387	83	26	6	3
	chr9	104160871	104161020	TRUE	2.1594e-41	7.49e-44	0.9875	0.132425	52	16	6	3
	chr7	107531486	107531635	TRUE	2.18163e-41	7.65e-44	0.769264	0.123434	77	22	7	3
	chr7	28725621	28725770	TRUE	2.21198e-41	7.82e-44	0.696855	0.20428	168	23	14	7
	chr1	53480462	53480611	TRUE	4.23677e-41	1.51e-43	0.558213	0.112282	125	23	10	5
	chr6	31926816	31926965	TRUE	4.92655e-41	1.77e-43	0.893519	0.104678	53	18	3	2
	chr11	85358945	85359094	TRUE	6.43376e-41	2.33e-43	0.792593	0.139024	86	27	6	3
	chr14	102276072	102276221	TRUE	6.9858e-41	2.55e-43	0.840625	0.153189	86	24	7	3
	chr6	170862339	170862488	TRUE	7.23021e-41	2.66e-43	0.880667	0.144676	72	25	5	2
	chr1	145209011	145209160	TRUE	8.17207e-41	3.03e-43	0.836207	0.114649	74	29	5	2
	chr10	73611034	73611183	TRUE	9.55442e-41	3.57e-43	0.962088	0.196306	72	26	5	2
	chr5	133747531	133747680	TRUE	1.14734e-40	4.32e-43	0.962963	0.152962	55	27	3	2
	chr5	76326132	76326281	TRUE	1.23617e-40	4.69e-43	0.858333	0.122561	74	24	5	3
	chr7	72298731	72298880	TRUE	1.37598e-40	5.26e-43	0.849702	0.231624	107	28	7	3
	chr7	35756186	35756335	TRUE	1.46698e-40	5.65e-43	0.534217	0.116112	212	23	19	9
	chr6	21593872	21594021	TRUE	1.70352e-40	6.61e-43	0.882919	0.174328	89	23	8	3
	chr5	177019113	177019262	TRUE	2.23334e-40	8.73e-43	0.930208	0.0986122	53	32	3	1
	chr6	26156459	26156608	TRUE	3.37762e-40	1.33e-42	0.677419	0.105197	89	31	5	2
	chr7	30066220	30066369	TRUE	4.15991e-40	1.65e-42	0.712418	0.126018	105	17	11	6
	chr7	42971757	42971906	TRUE	5.60677e-40	2.24e-42	0.800752	0.131861	81	19	8	4
	chr19	47852446	47852595	TRUE	6.31226e-40	2.54e-42	0.939506	0.128656	61	27	4	2
	chr7	44084139	44084288	TRUE	8.63631e-40	3.5e-42	0.895833	0.20252	77	28	5	2
	chr7	110730962	110731111	TRUE	9.99657e-40	4.08e-42	0.677605	0.106629	121	17	15	7
	chr7	8008323	8008472	TRUE	1.01943e-39	4.19e-42	0.878472	0.117097	66	24	3	2
	chr4	104020976	104021125	TRUE	1.15653e-39	4.82e-42	0.621843	0.13021	117	18	13	6
	chr12	49245909	49246058	TRUE	1.15653e-39	4.82e-42	1	0.126414	46	20	4	2
	chr22	41697467	41697616	TRUE	1.3607e-39	5.71e-42	0.892857	0.0982429	48	21	3	2
	chr10	75118564	75118713	TRUE	1.38221e-39	5.84e-42	0.675667	0.137271	143	27	10	5
	chr20	23402033	23402182	TRUE	1.39873e-39	5.95e-42	0.965278	0.148814	58	24	4	2
	chr6	31865416	31865565	TRUE	1.50143e-39	6.43e-42	0.926471	0.107844	52	34	3	1
	chr9	135282173	135282322	TRUE	2.0852e-39	8.99e-42	0.823452	0.177183	98	20	9	4
	chr7	128095857	128096006	TRUE	2.29028e-39	9.94e-42	0.817687	0.136381	92	28	6	3
	chr9	133569058	133569207	TRUE	2.35762e-39	1.03e-41	0.859615	0.175188	77	26	6	2
	chr11	71639983	71640132	TRUE	2.41043e-39	1.06e-41	0.974	0.19056	66	25	4	2
	chr7	56119220	56119369	TRUE	2.66588e-39	1.18e-41	0.92866	0.183553	72	27	5	2
	chr12	82752224	82752373	TRUE	2.67113e-39	1.19e-41	0.866667	0.142616	61	30	3	2
	chr14	23504061	23504210	TRUE	2.78782e-39	1.25e-41	0.816667	0.112465	68	20	6	3
	chr6	27356424	27356573	TRUE	3.21327e-39	1.45e-41	0.780435	0.0779272	61	23	4	2
	chr1	153643431	153643580	TRUE	5.68123e-39	2.58e-41	0.667927	0.0916061	88	17	9	5
	chr1	150293828	150293977	TRUE	5.90808e-39	2.7e-41	0.767949	0.123864	74	26	5	2
	chr1	219347045	219347194	TRUE	6.17558e-39	2.84e-41	0.736667	0.0788329	75	25	5	3
	chr2	96874041	96874190	TRUE	1.28644e-38	5.99e-41	0.82265	0.144833	73	39	3	1
	chr22	29137774	29137923	TRUE	1.28644e-38	5.98e-41	0.894444	0.167493	72	30	4	2
	chr19	5978065	5978214	TRUE	1.3618e-38	6.38e-41	0.855333	0.166515	76	25	6	3
	chr4	124317856	124318005	TRUE	1.46593e-38	6.91e-41	0.884259	0.0768519	50	18	5	2
	chr13	41706874	41707023	TRUE	1.53296e-38	7.27e-41	0.770833	0.15625	100	28	7	3
	chr1	155826960	155827109	TRUE	1.59079e-38	7.59e-41	0.837121	0.0903843	53	22	4	2
	chr2	224467073	224467222	TRUE	1.67502e-38	8.04e-41	0.895833	0.127435	63	20	6	3
	chr5	36152089	36152238	TRUE	1.67954e-38	8.11e-41	0.854847	0.154558	81	28	6	2
	chr7	12250826	12250975	TRUE	1.81989e-38	8.84e-41	0.874074	0.171256	79	27	5	2
	chr6	31509730	31509879	TRUE	2.0118e-38	9.83e-41	0.8375	0.141516	85	26	6	3
	chr3	185655160	185655309	TRUE	2.72639e-38	1.34e-40	0.988889	0.175703	56	30	3	1
	chr4	113739139	113739288	TRUE	3.15742e-38	1.57e-40	0.7678	0.109499	78	21	6	3
	chr17	49230820	49230969	TRUE	3.15742e-38	1.57e-40	0.80303	0.135832	76	22	7	3
	chr7	23145274	23145423	TRUE	3.19926e-38	1.6e-40	0.917391	0.110089	55	23	4	2
	chr1	156182684	156182833	TRUE	3.49908e-38	1.76e-40	0.919333	0.157439	67	25	5	2
	chr7	33169052	33169201	TRUE	4.26993e-38	2.16e-40	0.864569	0.214773	100	21	9	4
	chr1	6259631	6259780	TRUE	4.3834e-38	2.23e-40	0.927273	0.158996	65	22	5	2
	chr7	22862373	22862522	TRUE	4.76924e-38	2.44e-40	0.754857	0.157828	105	25	8	4
	chr9	116172922	116173071	TRUE	4.78147e-38	2.46e-40	0.842208	0.209933	111	22	8	5
	chr16	279401	279550	TRUE	5.45075e-38	2.82e-40	0.862879	0.161635	82	22	7	3
	chr10	32734941	32735090	TRUE	5.8243e-38	3.03e-40	0.930556	0.111563	53	24	3	2
	chr7	100025906	100026055	TRUE	7.14852e-38	3.74e-40	0.684225	0.120102	111	17	13	6
	chr9	115818948	115819097	TRUE	7.14852e-38	3.76e-40	0.933658	0.150801	63	22	5	2
	chr3	106959431	106959580	TRUE	7.1664e-38	3.79e-40	0.806667	0.124731	71	30	4	2
	chr2	61372037	61372186	TRUE	7.31572e-38	3.89e-40	0.789095	0.123543	88	27	6	3
	chr11	102980060	102980209	TRUE	8.39871e-38	4.49e-40	0.804861	0.124374	69	24	5	2
	chr3	129158868	129159017	TRUE	1.04004e-37	5.59e-40	0.884848	0.172834	74	22	6	3
	chr4	147096735	147096884	TRUE	1.13999e-37	6.16e-40	0.669432	0.0813829	109	31	7	3
	chr13	108867834	108867983	TRUE	1.22784e-37	6.67e-40	0.923077	0.103518	51	26	2	1
	chr17	28804326	28804475	TRUE	1.39534e-37	7.62e-40	0.802667	0.13121	74	25	6	2
	chr7	99716925	99717074	TRUE	1.54287e-37	8.47e-40	0.648356	0.135074	145	28	10	5
	chr17	58042069	58042218	TRUE	2.13826e-37	1.18e-39	0.929487	0.126668	51	26	4	1
	chr11	82782836	82782985	TRUE	2.25337e-37	1.25e-39	0.859195	0.182571	80	29	5	2
	chr7	141437972	141438121	TRUE	2.51076e-37	1.4e-39	0.740575	0.142881	82	16	10	5
	chr7	127983914	127984063	TRUE	3.17589e-37	1.78e-39	0.820112	0.125798	81	16	10	5
	chr20	18477839	18477988	TRUE	3.30169e-37	1.86e-39	0.916667	0.174014	57	24	4	2
	chr13	41706888	41707037	TRUE	3.97371e-37	2.25e-39	0.770833	0.160403	99	28	7	3
	chr5	53751345	53751494	TRUE	4.61562e-37	2.64e-39	0.730571	0.117	90	25	7	3
	chr16	69364450	69364599	TRUE	4.61562e-37	2.63e-39	0.91954	0.153708	58	29	3	2
	chr19	44331373	44331522	TRUE	4.69692e-37	2.7e-39	0.784848	0.0926502	64	22	5	2
	chr9	77703085	77703234	TRUE	5.44271e-37	3.16e-39	0.92	0.129328	51	25	3	2
	chr17	45569799	45569948	TRUE	5.44271e-37	3.16e-39	0.927083	0.127377	55	20	5	2
	chr7	148725734	148725883	TRUE	7.71251e-37	4.5e-39	0.823868	0.270789	106	27	7	3
	chr7	42971839	42971988	TRUE	8.44218e-37	4.95e-39	0.790774	0.165767	100	24	8	4
	chr10	72163822	72163971	TRUE	8.45191e-37	4.98e-39	0.858333	0.177439	80	32	4	2
	chr6	33359213	33359362	TRUE	9.03579e-37	5.35e-39	0.909167	0.138292	59	20	5	2
	chr12	48166891	48167040	TRUE	1.28243e-36	7.63e-39	0.857143	0.124244	58	35	3	1
	chr3	10068013	10068162	TRUE	1.39001e-36	8.31e-39	0.9375	0.109622	49	20	3	2
	chr7	123197910	123198059	TRUE	1.45327e-36	8.73e-39	0.65337	0.137208	105	21	10	5
	chr14	52456128	52456277	TRUE	1.49771e-36	9.04e-39	0.823485	0.134788	66	22	5	3
	chr2	153573927	153574076	TRUE	1.68189e-36	1.02e-38	0.951515	0.161221	61	22	4	2
	chr7	129251455	129251604	TRUE	1.77242e-36	1.08e-38	0.807292	0.144359	68	32	4	2
	chr19	14016872	14017021	TRUE	2.05812e-36	1.26e-38	0.836667	0.118939	66	25	5	2
	chr21	35899213	35899362	TRUE	2.3574e-36	1.45e-38	0.743601	0.152642	106	16	13	6
	chr7	100209625	100209774	TRUE	2.6539e-36	1.64e-38	0.851984	0.122522	63	14	10	4
	chr7	99716931	99717080	TRUE	2.78658e-36	1.73e-38	0.647678	0.136462	142	27	10	5
	chr4	88312407	88312556	TRUE	3.03027e-36	1.89e-38	0.771667	0.14002	92	25	7	3
	chr7	128095784	128095933	TRUE	3.08021e-36	1.93e-38	0.838462	0.113762	61	26	4	2
	chr1	16971130	16971279	TRUE	3.17735e-36	2e-38	0.861238	0.176735	85	25	7	3
	chr16	89883017	89883166	TRUE	3.27361e-36	2.07e-38	0.945946	0.201371	66	37	3	1
	chr15	38746228	38746377	TRUE	3.369e-36	2.14e-38	0.587267	0.0649144	68	23	5	2
	chr19	41945394	41945543	TRUE	4.13743e-36	2.64e-38	0.948893	0.137548	58	13	9	4
	chr3	106959439	106959588	TRUE	4.56645e-36	2.94e-38	0.780645	0.124731	74	31	4	2
	chr16	57406314	57406463	TRUE	4.56645e-36	2.93e-38	0.931034	0.118968	48	29	3	1
	chr12	95611192	95611341	TRUE	4.63893e-36	3e-38	0.783333	0.151677	71	30	4	2
	chr12	4758183	4758332	TRUE	5.18801e-36	3.37e-38	0.659127	0.121683	85	21	8	4
	chr2	219824298	219824447	TRUE	5.42571e-36	3.54e-38	0.839286	0.12824	60	28	3	2
	chr9	97021478	97021627	TRUE	7.53827e-36	4.94e-38	0.925	0.124831	51	20	5	2
	chr8	55047681	55047830	TRUE	8.0523e-36	5.3e-38	0.755747	0.0944791	58	29	4	2
	chr19	14016861	14017010	TRUE	9.90816e-36	6.55e-38	0.804487	0.11925	67	26	5	2
	chr1	179846886	179847035	TRUE	1.0769e-35	7.15e-38	0.965686	0.0944159	41	17	4	2
	chr14	90722794	90722943	TRUE	1.20572e-35	8.04e-38	0.796528	0.107869	66	24	5	2
	chr2	118572155	118572304	TRUE	1.45589e-35	9.75e-38	0.735714	0.13993	77	21	7	3
	chr12	69753432	69753581	TRUE	2.14105e-35	1.44e-37	0.639698	0.178003	138	26	9	5
	chr9	77703081	77703230	TRUE	2.47245e-35	1.67e-37	0.916667	0.129328	49	24	3	2
	chr19	21950275	21950424	TRUE	2.52095e-35	1.71e-37	0.667769	0.19213	118	27	8	4
	chr7	23145253	23145402	TRUE	2.55435e-35	1.74e-37	0.9	0.107248	53	21	5	2
	chr3	69133990	69134139	TRUE	2.99679e-35	2.05e-37	0.770779	0.122116	89	22	8	4
	chr19	46220591	46220740	TRUE	3.40641e-35	2.34e-37	0.873333	0.147834	63	20	6	3
	chr19	52511410	52511559	TRUE	3.4647e-35	2.39e-37	0.725694	0.133354	87	24	6	3
	chr1	55230139	55230288	TRUE	3.85455e-35	2.67e-37	0.923913	0.123437	52	23	3	2
	chr19	36103546	36103695	TRUE	4.05427e-35	2.82e-37	0.946429	0.109368	43	14	3	3
	chr7	134143840	134143989	TRUE	4.10918e-35	2.87e-37	0.857672	0.21124	83	27	6	3
	chr13	29233151	29233300	TRUE	4.31705e-35	3.04e-37	0.925397	0.131043	49	18	4	2
	chr16	86588793	86588942	TRUE	4.31705e-35	3.03e-37	1	0.103043	37	19	3	1
	chr9	130341220	130341369	TRUE	6.90183e-35	4.88e-37	0.807971	0.123014	65	23	5	2
	chr2	153573873	153574022	TRUE	6.91614e-35	4.91e-37	0.830667	0.138032	72	25	4	2
	chr15	93443451	93443600	TRUE	7.22495e-35	5.15e-37	0.906151	0.109413	51	12	9	4
	chr7	99149668	99149817	TRUE	7.2658e-35	5.2e-37	0.69623	0.107004	78	18	9	4
	chr1	67390522	67390671	TRUE	8.72583e-35	6.27e-37	0.948718	0.155943	53	26	3	2
	chr8	50822249	50822398	TRUE	9.70295e-35	7e-37	0.902778	0.13346	49	24	3	2
	chr19	58330994	58331143	TRUE	1.05342e-34	7.63e-37	0.7575	0.113023	59	20	5	2
	chr17	55927351	55927500	TRUE	1.21016e-34	8.8e-37	0.954545	0.0903721	37	22	3	1
	chr1	86861955	86862104	TRUE	1.26977e-34	9.27e-37	0.610938	0.114524	97	32	6	3
	chr21	34185958	34186107	TRUE	1.30845e-34	9.59e-37	0.61362	0.177919	171	27	13	6
	chr4	76439554	76439703	TRUE	1.31014e-34	9.64e-37	0.920455	0.157308	53	22	4	2
	chr6	43395192	43395341	TRUE	1.67217e-34	1.24e-36	0.847826	0.102487	60	23	3	2
	chr9	128469465	128469614	TRUE	1.67217e-34	1.24e-36	0.960938	0.127596	52	16	6	3
	chr11	47270367	47270516	TRUE	1.71945e-34	1.28e-36	0.778667	0.166994	80	25	6	3
	chr12	54718811	54718960	TRUE	1.81989e-34	1.36e-36	0.840278	0.188961	79	24	5	3
	chr1	170501170	170501319	TRUE	2.13284e-34	1.6e-36	0.809295	0.152888	91	26	5	3
	chr7	102004241	102004390	TRUE	2.32389e-34	1.75e-36	0.812069	0.145423	82	29	5	2
	chr1	213189120	213189269	TRUE	3.25431e-34	2.46e-36	0.7071	0.218438	126	28	9	4
	chr16	75681584	75681733	TRUE	3.43966e-34	2.61e-36	0.804321	0.155074	73	27	5	2
	chr9	123883979	123884128	TRUE	3.85994e-34	2.94e-36	0.755556	0.149879	95	24	7	3
	chr2	65454802	65454951	TRUE	4.3817e-34	3.35e-36	0.964744	0.132315	48	26	3	1
	chr5	159436080	159436229	TRUE	4.61287e-34	3.54e-36	0.872917	0.145667	59	16	7	3
	chr15	65809987	65810136	TRUE	5.10196e-34	3.93e-36	0.745062	0.160676	74	27	5	2
	chr7	5229735	5229884	TRUE	5.54095e-34	4.3e-36	0.87963	0.146007	63	27	4	2
	chr7	55640152	55640301	TRUE	5.54095e-34	4.3e-36	0.914062	0.210056	74	32	3	2
	chr17	73043179	73043328	TRUE	6.21377e-34	4.84e-36	0.982759	0.176331	50	29	3	1
	chr9	126773789	126773938	TRUE	6.90724e-34	5.4e-36	0.813964	0.208915	89	37	4	2
	chr7	18535262	18535411	TRUE	7.03459e-34	5.54e-36	0.655904	0.173817	147	18	16	8
	chr13	46626833	46626982	TRUE	7.03459e-34	5.54e-36	0.828947	0.161399	72	19	6	3
	chr9	95432499	95432648	TRUE	7.97053e-34	6.3e-36	0.893789	0.19571	73	23	6	3
	chr4	124286	124435	TRUE	8.77363e-34	6.96e-36	0.83046	0.135809	70	29	4	2
	chr7	108210119	108210268	TRUE	8.99317e-34	7.16e-36	0.801515	0.212479	81	22	7	3
	chr7	32529929	32530078	TRUE	9.28621e-34	7.42e-36	0.846491	0.11201	54	19	5	2
	chr15	78591892	78592041	TRUE	9.83903e-34	7.89e-36	0.727273	0.15291	90	33	5	2
	chr2	27632448	27632597	TRUE	1.15186e-33	9.27e-36	0.869444	0.172143	72	30	4	2
	chr4	139163455	139163604	TRUE	1.17129e-33	9.46e-36	0.685292	0.116821	113	31	7	3
	chr20	18488088	18488237	TRUE	1.30778e-33	1.06e-35	0.879365	0.0952457	45	21	4	2
	chr7	37025673	37025822	TRUE	1.31546e-33	1.07e-35	0.587726	0.130708	143	18	16	7
	chr10	70748393	70748542	TRUE	1.37208e-33	1.12e-35	0.678947	0.113343	78	19	8	4
	chr6	27356438	27356587	TRUE	1.40389e-33	1.15e-35	0.828947	0.0867924	47	19	4	2
	chr7	64126411	64126560	TRUE	1.56929e-33	1.29e-35	0.652857	0.175087	108	30	7	3
	chr9	123342389	123342538	TRUE	1.6608e-33	1.37e-35	0.791071	0.134289	60	20	6	3
	chr13	60325026	60325175	TRUE	1.7396e-33	1.44e-35	0.429487	0.107256	134	26	10	5
	chr6	42981570	42981719	TRUE	1.74562e-33	1.45e-35	0.791937	0.118469	64	22	5	2
	chr7	92861553	92861702	TRUE	1.94355e-33	1.62e-35	0.899519	0.150475	69	15	8	4
	chr20	18568456	18568605	TRUE	2.23577e-33	1.87e-35	0.816667	0.0990935	51	20	4	2
	chr9	129567261	129567410	TRUE	2.27578e-33	1.91e-35	0.793333	0.146782	70	25	5	2
	chr5	54455896	54456045	TRUE	2.48175e-33	2.09e-35	0.756173	0.145904	91	18	9	5
	chr19	56146282	56146431	TRUE	2.62715e-33	2.22e-35	0.886286	0.178339	62	25	5	2
	chr7	64838668	64838817	TRUE	2.79746e-33	2.38e-35	0.810833	0.13815	68	20	6	3
	chr11	34460378	34460527	TRUE	2.79746e-33	2.38e-35	0.946667	0.132325	47	25	3	1
	chr8	92082324	92082473	TRUE	2.90519e-33	2.48e-35	0.864198	0.146153	64	27	4	2
	chr4	24586136	24586285	TRUE	3.31575e-33	2.84e-35	0.867308	0.126213	58	26	4	2
	chr3	150803351	150803500	TRUE	3.31629e-33	2.85e-35	0.977273	0.165678	50	22	3	2
	chr11	118889009	118889158	TRUE	3.4792e-33	3e-35	0.96	0.122653	43	25	3	1
	chr7	99063760	99063909	TRUE	3.60635e-33	3.12e-35	0.943182	0.109358	43	22	3	1
	chr3	120461336	120461485	TRUE	4.25108e-33	3.69e-35	0.882353	0.122607	59	17	6	3
	chr5	178986632	178986781	TRUE	4.926e-33	4.29e-35	0.925	0.163956	52	20	4	2
	chr20	18774586	18774735	TRUE	4.93268e-33	4.31e-35	0.875	0.0761433	39	14	5	2
	chr16	89883007	89883156	TRUE	5.15606e-33	4.52e-35	0.942857	0.201371	61	35	3	1
	chr1	43123948	43124097	TRUE	6.42401e-33	5.65e-35	0.837302	0.116605	52	21	5	2
	chr19	58280925	58281074	TRUE	6.9584e-33	6.14e-35	0.824074	0.153606	63	27	4	2
	chr11	10830534	10830683	TRUE	9.77113e-33	8.65e-35	0.892857	0.187572	84	26	5	3
	chr7	65447198	65447347	TRUE	1.02462e-32	9.1e-35	0.893478	0.150125	66	23	5	2
	chr3	156272887	156273036	TRUE	1.03366e-32	9.21e-35	0.811594	0.117546	50	23	4	2
	chr19	50528588	50528737	TRUE	1.0818e-32	9.67e-35	0.924206	0.128883	50	14	7	3
	chr14	45553132	45553281	TRUE	1.42736e-32	1.28e-34	0.910714	0.135386	51	28	3	1
	chr1	109756440	109756589	TRUE	1.45615e-32	1.31e-34	1	0.169798	44	29	2	1
	chr17	28705884	28706033	TRUE	1.65676e-32	1.5e-34	0.96875	0.169872	47	32	2	1
	chr19	8455105	8455254	TRUE	1.65676e-32	1.5e-34	0.963768	0.159087	48	23	3	2
	chr10	81838326	81838475	TRUE	1.70657e-32	1.55e-34	0.796296	0.0970811	46	27	3	1
	chr3	49507465	49507614	TRUE	1.74509e-32	1.59e-34	0.925926	0.160284	53	27	3	1
	chr1	32687878	32688027	TRUE	1.76148e-32	1.61e-34	0.936111	0.119274	46	12	6	3
	chr3	40351073	40351222	TRUE	1.94137e-32	1.78e-34	0.766952	0.139163	76	25	6	3
	chr2	27805793	27805942	TRUE	2.00054e-32	1.84e-34	0.933333	0.128228	43	20	3	2
	chr6	42981612	42981761	TRUE	2.08102e-32	1.92e-34	0.862798	0.120144	63	20	6	3
	chr17	12921273	12921422	TRUE	2.45273e-32	2.27e-34	0.963768	0.147913	46	23	3	2
	chr1	203764651	203764800	TRUE	2.56362e-32	2.38e-34	0.7375	0.131533	56	20	5	2
	chr7	32982734	32982883	TRUE	2.68457e-32	2.5e-34	0.885053	0.232459	94	36	4	2
	chr1	193155676	193155825	TRUE	2.79407e-32	2.61e-34	0.743056	0.177623	117	24	9	4
	chr16	46655263	46655412	TRUE	2.95625e-32	2.77e-34	0.885802	0.188399	69	27	4	2
	chr7	151722678	151722827	TRUE	3.06425e-32	2.88e-34	0.846154	0.128018	59	26	4	2
	chr7	141438076	141438225	TRUE	3.1928e-32	3.01e-34	0.688056	0.162053	90	20	8	4
	chr15	75628274	75628423	TRUE	3.28885e-32	3.11e-34	0.689827	0.122182	80	22	7	3
	chr20	2451451	2451600	TRUE	3.31051e-32	3.14e-34	0.993421	0.159485	45	19	4	2
	chr1	75198679	75198828	TRUE	3.33204e-32	3.17e-34	0.853423	0.148444	63	16	7	3
	chr19	13227515	13227664	TRUE	3.4268e-32	3.27e-34	0.871875	0.126613	51	16	6	3
	chr7	150924269	150924418	TRUE	3.64637e-32	3.49e-34	0.925439	0.121522	46	19	4	2
	chr12	58165893	58166042	TRUE	4.18754e-32	4.02e-34	0.787356	0.117263	62	29	4	2
	chr12	101673805	101673954	TRUE	4.33083e-32	4.17e-34	0.771222	0.0819846	56	23	5	2
	chr6	136172734	136172883	TRUE	4.52503e-32	4.37e-34	0.736905	0.107877	84	28	4	3
	chr7	127225606	127225755	TRUE	4.56322e-32	4.42e-34	0.807456	0.134243	60	19	5	3
	chr11	126138955	126139104	TRUE	4.71442e-32	4.58e-34	0.907738	0.174331	70	28	4	2
	chr1	193155692	193155841	TRUE	4.96735e-32	4.84e-34	0.743056	0.179129	117	24	9	4
	chr16	31884979	31885128	TRUE	5.17787e-32	5.06e-34	0.835714	0.134613	60	21	5	2
	chr7	102004230	102004379	TRUE	5.67283e-32	5.56e-34	0.822	0.145423	75	25	6	3
	chr19	58951541	58951690	TRUE	5.77832e-32	5.68e-34	0.883333	0.172841	59	21	5	2
	chr1	155826924	155827073	TRUE	5.95712e-32	5.89e-34	0.785714	0.0835453	53	21	4	2
	chr20	54967303	54967452	TRUE	5.95712e-32	5.89e-34	0.852632	0.121853	61	19	5	3
	chr3	179322386	179322535	TRUE	6.47434e-32	6.42e-34	0.74127	0.14035	72	21	6	3
	chr11	134123212	134123361	TRUE	6.51596e-32	6.48e-34	0.840278	0.140386	61	24	4	2
	chr9	128024011	128024160	TRUE	9.13415e-32	9.11e-34	0.695833	0.158153	83	36	4	2
	chr9	74526100	74526249	TRUE	9.41783e-32	9.42e-34	0.928571	0.160365	52	21	4	2
	chr7	148892477	148892626	TRUE	1.16638e-31	1.17e-33	0.872222	0.141623	53	30	3	1
	chr12	88429168	88429317	TRUE	1.18293e-31	1.19e-33	0.931818	0.125177	46	22	3	2
	chr1	32687859	32688008	TRUE	1.21921e-31	1.23e-33	0.930303	0.119274	45	11	6	4
	chr8	74884474	74884623	TRUE	1.3047e-31	1.32e-33	0.966667	0.173225	49	15	6	3
	chr17	57970343	57970492	TRUE	1.37e-31	1.39e-33	0.798077	0.158766	70	26	4	2
	chr5	53606355	53606504	TRUE	1.37595e-31	1.4e-33	0.68619	0.12856	92	35	5	2
	chr8	73920997	73921146	TRUE	1.48969e-31	1.52e-33	0.890152	0.12543	50	22	4	2
	chr9	6015570	6015719	TRUE	1.54414e-31	1.58e-33	0.850877	0.0863883	43	19	4	2
	chr9	130213692	130213841	TRUE	1.63727e-31	1.68e-33	0.70679	0.142869	79	27	5	2
	chr16	21169812	21169961	TRUE	1.71044e-31	1.76e-33	0.823232	0.173699	73	33	4	2
	chr7	138818424	138818573	TRUE	1.73475e-31	1.79e-33	0.775325	0.127419	77	22	6	3
	chr17	56769863	56770012	TRUE	1.86524e-31	1.93e-33	0.646875	0.0820398	82	32	4	2
	chr7	100472601	100472750	TRUE	1.9179e-31	1.99e-33	0.819298	0.155033	69	19	7	3
	chr17	43239162	43239311	TRUE	2.14326e-31	2.23e-33	0.877976	0.174536	67	28	4	2
	chr8	92261416	92261565	TRUE	2.87537e-31	3e-33	0.593197	0.087362	89	14	12	6
	chr9	116172835	116172984	TRUE	2.99173e-31	3.13e-33	0.770186	0.206855	90	23	7	3
	chr1	3713020	3713169	TRUE	3.63171e-31	3.81e-33	0.728788	0.123532	74	33	4	2
	chr5	159846120	159846269	TRUE	3.73586e-31	3.93e-33	0.865923	0.141723	64	16	7	4
	chr7	56019511	56019660	TRUE	3.95321e-31	4.17e-33	0.701389	0.119279	68	24	5	2
	chr9	127420591	127420740	TRUE	4.27121e-31	4.52e-33	0.672884	0.141704	117	21	11	5
	chr18	61089704	61089853	TRUE	4.27121e-31	4.53e-33	0.844697	0.134394	51	22	4	2
	chr3	183967345	183967494	TRUE	4.42893e-31	4.71e-33	0.895833	0.21947	71	28	5	2
	chr17	38444046	38444195	TRUE	4.73584e-31	5.05e-33	0.786111	0.178102	81	30	5	2
	chr20	32950962	32951111	TRUE	5.02239e-31	5.37e-33	0.77957	0.141347	60	31	3	1
	chr11	9336248	9336397	TRUE	6.05362e-31	6.49e-33	0.869565	0.179928	61	23	5	2
	chr10	124913770	124913919	TRUE	6.08395e-31	6.54e-33	0.957576	0.196944	57	22	5	2
	chr1	38325244	38325393	TRUE	6.26256e-31	6.75e-33	0.942982	0.156989	48	19	4	2
	chr4	141294466	141294615	TRUE	6.64379e-31	7.18e-33	0.84881	0.114161	51	14	7	3
	chr5	14440828	14440977	TRUE	6.77383e-31	7.34e-33	0.845688	0.173263	66	15	10	4
	chr12	56211458	56211607	TRUE	7.05965e-31	7.67e-33	0.833333	0.120604	54	18	5	3
	chr13	34392106	34392255	TRUE	7.601e-31	8.28e-33	0.823529	0.130962	54	17	6	3
	chr17	29058624	29058773	TRUE	7.67255e-31	8.38e-33	0.972222	0.15128	42	18	4	2
	chr3	40498701	40498850	TRUE	7.67981e-31	8.41e-33	0.870833	0.170771	57	16	5	3
	chr7	54826891	54827040	TRUE	9.83648e-31	1.08e-32	0.781667	0.13175	54	20	5	2
	chr1	38019855	38020004	TRUE	1.04467e-30	1.15e-32	0.867647	0.107792	44	17	5	2
	chr12	95867722	95867871	TRUE	1.16879e-30	1.29e-32	0.901786	0.16341	51	28	3	1
	chr4	124302	124451	TRUE	1.20191e-30	1.33e-32	0.824405	0.141949	67	28	5	2
	chr5	43120885	43121034	TRUE	1.21682e-30	1.35e-32	0.888889	0.091638	43	24	3	1
	chr13	46626846	46626995	TRUE	1.33055e-30	1.48e-32	0.847222	0.165207	64	18	6	3
	chr9	6015555	6015704	TRUE	1.40782e-30	1.57e-32	0.808333	0.0838272	45	20	4	2
	chr9	94877642	94877791	TRUE	1.42209e-30	1.59e-32	0.749275	0.148769	79	23	7	3
	chr2	75873809	75873958	TRUE	1.48089e-30	1.66e-32	0.776543	0.113167	54	27	3	2
	chr7	18535269	18535418	TRUE	1.52659e-30	1.72e-32	0.629995	0.176084	148	19	15	7
	chr7	56119278	56119427	TRUE	1.52659e-30	1.72e-32	0.913667	0.205064	65	25	5	2
	chr6	34204550	34204699	TRUE	1.73517e-30	1.96e-32	0.92	0.154396	47	25	3	1
	chr12	49412544	49412693	TRUE	1.81024e-30	2.05e-32	0.968254	0.196703	51	21	4	2
	chr10	101418946	101419095	TRUE	1.81447e-30	2.06e-32	0.78	0.101906	50	25	3	2
	chr7	91875180	91875329	TRUE	2.14375e-30	2.44e-32	0.760333	0.122583	76	25	6	3
	chr10	75936344	75936493	TRUE	2.14711e-30	2.45e-32	0.942308	0.167995	49	26	3	1
	chr1	16693483	16693632	TRUE	2.1592e-30	2.47e-32	0.848214	0.150801	57	16	7	3
	chr19	50083755	50083904	TRUE	2.16251e-30	2.48e-32	0.863542	0.123124	52	16	6	3
	chr1	17380617	17380766	TRUE	2.26148e-30	2.6e-32	0.95	0.172042	52	25	4	2
	chr19	19843873	19844022	TRUE	2.26452e-30	2.61e-32	0.766667	0.0971871	49	22	4	2
	chr21	47743737	47743886	TRUE	2.32812e-30	2.69e-32	0.864198	0.184878	61	27	4	2
	chr3	33686916	33687065	TRUE	2.36551e-30	2.74e-32	0.541604	0.0872948	110	19	11	5
	chr8	145634685	145634834	TRUE	2.47161e-30	2.87e-32	0.703125	0.119754	72	32	4	2
	chr19	11959479	11959628	TRUE	2.55141e-30	2.97e-32	0.958333	0.113835	36	24	2	1
	chr7	120590717	120590866	TRUE	2.73366e-30	3.19e-32	0.835714	0.173327	73	21	6	3
	chr1	156308147	156308296	TRUE	3.18855e-30	3.73e-32	0.782	0.144363	74	25	6	2
	chr3	169899489	169899638	TRUE	3.28307e-30	3.85e-32	0.830827	0.148341	64	19	5	3
	chr8	37707363	37707512	TRUE	3.61531e-30	4.25e-32	0.775833	0.137777	69	20	6	3
	chr6	28831406	28831555	TRUE	3.76772e-30	4.44e-32	0.785317	0.142738	92	20	8	4
	chr3	179065380	179065529	TRUE	4.19028e-30	4.95e-32	0.881944	0.14176	53	24	4	2
	chr21	40928269	40928418	TRUE	4.25611e-30	5.04e-32	0.55027	0.127701	123	25	10	4
	chr7	6388542	6388691	TRUE	4.91974e-30	5.84e-32	0.857407	0.15104	68	27	5	2
	chr1	28099594	28099743	TRUE	5.03391e-30	5.99e-32	0.833333	0.118606	45	21	3	2
	chr20	5591624	5591773	TRUE	5.55834e-30	6.63e-32	0.922222	0.169291	51	30	3	1
	chr12	25403806	25403955	TRUE	5.69552e-30	6.81e-32	0.818182	0.162554	74	33	3	2
	chr7	142985302	142985451	TRUE	6.33264e-30	7.59e-32	0.815972	0.170613	68	24	5	2
	chr1	204485411	204485560	TRUE	6.50893e-30	7.82e-32	0.835119	0.134727	68	18	6	3
	chr9	97021502	97021651	TRUE	6.90027e-30	8.31e-32	0.931373	0.133468	43	17	5	2
	chr3	127842594	127842743	TRUE	7.09094e-30	8.56e-32	0.867816	0.132355	53	29	3	1
	chr7	150777833	150777982	TRUE	7.35414e-30	8.91e-32	0.822581	0.190831	76	31	5	2
	chr14	32798423	32798572	TRUE	7.35414e-30	8.92e-32	0.527564	0.101836	100	26	7	3
	chr7	7222146	7222295	TRUE	7.62463e-30	9.27e-32	0.968182	0.196382	50	22	4	2
	chr9	131790531	131790680	TRUE	8.35008e-30	1.02e-31	0.860215	0.20472	66	31	3	2
	chr14	22901678	22901827	TRUE	8.35008e-30	1.02e-31	0.583369	0.102123	75	9	15	8
	chr14	23298992	23299141	TRUE	8.65716e-30	1.06e-31	0.760417	0.0969234	50	24	4	2
	chr1	24151901	24152050	TRUE	9.04429e-30	1.11e-31	0.990476	0.154043	41	21	3	1
	chr7	17980083	17980232	TRUE	9.18574e-30	1.13e-31	0.933333	0.192945	52	20	4	2
	chr19	1479180	1479329	TRUE	1.02186e-29	1.26e-31	1	0.123365	34	19	3	1
	chr14	95623711	95623860	TRUE	1.06803e-29	1.32e-31	0.802151	0.154549	79	31	4	2
	chr7	149569957	149570106	TRUE	1.13013e-29	1.4e-31	0.590564	0.156894	135	21	11	6
	chr19	13229009	13229158	TRUE	1.15973e-29	1.44e-31	0.850877	0.185274	60	38	2	1
	chr11	5706245	5706394	TRUE	1.17313e-29	1.46e-31	0.882653	0.168286	57	14	7	4
	chr3	147657692	147657841	TRUE	1.23455e-29	1.54e-31	0.77402	0.112384	71	17	7	4
	chr3	39448104	39448253	TRUE	1.34369e-29	1.68e-31	0.947368	0.137877	41	19	4	2
	chr12	133757960	133758109	TRUE	1.47627e-29	1.85e-31	0.614424	0.132007	107	23	10	4
	chr6	41040140	41040289	TRUE	1.56046e-29	1.96e-31	0.9	0.156238	46	30	3	1
	chr17	73452564	73452713	TRUE	1.71577e-29	2.16e-31	0.74	0.140862	54	25	4	2
	chr18	9913855	9914004	TRUE	1.71979e-29	2.17e-31	0.908046	0.192395	61	29	3	2
	chr13	25875566	25875715	TRUE	1.81077e-29	2.29e-31	0.825	0.0790453	36	14	5	2
	chr1	200379118	200379267	TRUE	1.98811e-29	2.52e-31	0.729167	0.107503	55	24	3	2
	chr9	91933312	91933461	TRUE	2.00723e-29	2.55e-31	0.910256	0.150581	45	26	3	1
	chr3	169899468	169899617	TRUE	2.04982e-29	2.61e-31	0.840336	0.148341	61	17	5	3
	chr12	113659169	113659318	TRUE	2.06088e-29	2.63e-31	0.944444	0.211451	57	18	5	3
	chr1	85742298	85742447	TRUE	2.10316e-29	2.69e-31	0.958333	0.206987	48	24	3	2
	chr1	28995144	28995293	TRUE	2.10624e-29	2.7e-31	0.7875	0.0992297	55	24	3	2
	chr13	53422726	53422875	TRUE	2.2105e-29	2.84e-31	0.730769	0.0993543	55	26	3	2
	chr5	37371149	37371298	TRUE	2.39972e-29	3.09e-31	0.737351	0.12993	61	16	6	3
	chr17	67410738	67410887	TRUE	2.47186e-29	3.19e-31	0.687229	0.120605	82	22	7	3
	chr14	57857171	57857320	TRUE	2.48183e-29	3.21e-31	0.868421	0.119291	50	19	4	2
	chr1	67390542	67390691	TRUE	2.56118e-29	3.32e-31	0.930556	0.168975	50	24	3	2
	chr6	41040220	41040369	TRUE	2.58631e-29	3.36e-31	0.954861	0.187892	53	24	3	2
	chr19	19976614	19976763	TRUE	2.59596e-29	3.38e-31	0.780303	0.127779	64	22	5	2
	chr1	16939934	16940083	TRUE	2.82781e-29	3.69e-31	0.654167	0.214451	100	24	9	4
	chr11	117198471	117198620	TRUE	2.88277e-29	3.77e-31	0.815476	0.150114	63	16	7	3
	chr4	122791594	122791743	TRUE	2.92985e-29	3.84e-31	0.880667	0.187022	64	25	4	2
	chr3	49977492	49977641	TRUE	3.03003e-29	3.98e-31	0.885965	0.16796	52	19	5	2
	chr11	60681577	60681726	TRUE	3.13736e-29	4.13e-31	0.838719	0.191633	81	21	6	3
	chr4	178363543	178363692	TRUE	3.42614e-29	4.52e-31	0.846491	0.126019	51	19	5	2
	chr1	79115377	79115526	TRUE	3.43382e-29	4.54e-31	0.391576	0.0885018	102	22	9	4
	chr3	158362217	158362366	TRUE	3.50184e-29	4.64e-31	0.764928	0.0974742	67	21	6	3
	chr5	140070918	140071067	TRUE	3.68209e-29	4.9e-31	0.855072	0.150117	49	23	4	2
	chr5	140070923	140071072	TRUE	3.68209e-29	4.9e-31	0.855072	0.150117	49	23	4	2
	chr11	28129698	28129847	TRUE	3.83162e-29	5.11e-31	0.948718	0.203565	50	26	3	1
	chr16	75681529	75681678	TRUE	4.07777e-29	5.45e-31	0.797222	0.150627	61	24	5	2
	chr2	177134037	177134186	TRUE	4.64391e-29	6.22e-31	0.61875	0.085119	64	24	4	2
	chr1	170043831	170043980	TRUE	5.22623e-29	7.02e-31	0.855072	0.156142	58	23	5	2
	chr12	89746248	89746397	TRUE	5.22623e-29	7.03e-31	0.923913	0.20041	52	23	4	2
	chr4	110736566	110736715	TRUE	5.23735e-29	7.06e-31	0.841667	0.112624	52	24	4	2
	chr19	4400423	4400572	TRUE	5.38906e-29	7.28e-31	0.887097	0.185494	59	31	3	1
	chr10	35484730	35484879	TRUE	5.8356e-29	7.9e-31	0.735185	0.131458	59	18	6	3
	chr20	30697209	30697358	TRUE	6.00015e-29	8.14e-31	0.788889	0.11012	68	21	6	3
	chr2	234160117	234160266	TRUE	6.00217e-29	8.16e-31	0.776765	0.167411	93	29	5	3
	chr22	29949688	29949837	TRUE	6.12163e-29	8.34e-31	0.916667	0.151983	49	23	4	2
	chr12	124155591	124155740	TRUE	6.26988e-29	8.56e-31	0.796212	0.11595	56	22	3	2
	chr7	124569852	124570001	TRUE	6.54177e-29	8.95e-31	0.815741	0.131822	59	18	6	3
	chr1	145470339	145470488	TRUE	7.03863e-29	9.65e-31	0.733333	0.116779	49	20	4	2
	chr7	33102361	33102510	TRUE	7.04574e-29	9.68e-31	0.972222	0.186024	47	18	4	2
	chr12	49075987	49076136	TRUE	7.53827e-29	1.04e-30	0.899123	0.140172	47	19	5	2
	chr21	44846954	44847103	TRUE	7.53827e-29	1.04e-30	0.95	0.165594	44	30	2	1
	chr4	7044680	7044829	TRUE	8.02892e-29	1.11e-30	0.908046	0.194307	58	29	3	2
	chr8	120885800	120885949	TRUE	9.23937e-29	1.28e-30	0.881944	0.128615	49	24	4	2
	chr5	122847693	122847842	TRUE	9.29227e-29	1.29e-30	0.665572	0.134635	83	15	8	5
	chr6	71276525	71276674	TRUE	9.46916e-29	1.32e-30	0.910714	0.109096	40	28	2	1
	chr11	58910233	58910382	TRUE	9.46916e-29	1.32e-30	0.901961	0.109092	40	17	2	2
	chr4	109571641	109571790	TRUE	9.73603e-29	1.36e-30	0.822802	0.1212	55	13	7	4
	chr11	108338210	108338359	TRUE	1.02161e-28	1.43e-30	0.815789	0.12953	51	19	5	2
	chr15	83680310	83680459	TRUE	1.08369e-28	1.52e-30	0.796296	0.128084	58	27	3	2
	chr8	94766993	94767142	TRUE	1.40876e-28	1.98e-30	0.773333	0.097958	57	25	4	2
	chr3	15140607	15140756	TRUE	1.49819e-28	2.11e-30	0.940476	0.117083	41	21	3	1
	chr3	51740988	51741137	TRUE	1.53056e-28	2.16e-30	0.982759	0.151125	39	29	1	1
	chr5	64777656	64777805	TRUE	1.73253e-28	2.45e-30	0.669283	0.170887	110	27	8	4
	chr3	186285064	186285213	TRUE	1.78547e-28	2.53e-30	0.810897	0.119634	49	26	3	1
	chr7	100183856	100184005	TRUE	1.8875e-28	2.68e-30	0.795779	0.202704	86	22	7	3
	chr10	97453663	97453812	TRUE	1.92586e-28	2.74e-30	1	0.103419	30	17	3	1
	chr12	49075960	49076109	TRUE	1.99914e-28	2.85e-30	0.904167	0.13086	45	20	4	2
	chr2	220094379	220094528	TRUE	2.09312e-28	2.99e-30	0.9375	0.162769	43	20	4	2
	chr1	33502444	33502593	TRUE	2.17275e-28	3.11e-30	0.922222	0.12007	37	15	2	2
	chr7	91875164	91875313	TRUE	2.18234e-28	3.13e-30	0.768478	0.122583	70	23	6	3
	chr19	48867138	48867287	TRUE	2.21973e-28	3.19e-30	0.7	0.151537	62	24	4	2
	chr6	165723063	165723212	TRUE	2.25697e-28	3.25e-30	0.9	0.203992	70	22	5	3
	chr8	144905404	144905553	TRUE	2.2594e-28	3.26e-30	0.640787	0.160857	73	23	6	3
	chr1	28241183	28241332	TRUE	2.36999e-28	3.44e-30	0.85942	0.188905	65	23	5	2
	chr1	28241188	28241337	TRUE	2.36999e-28	3.44e-30	0.85942	0.188905	65	23	5	2
	chr1	222817564	222817713	TRUE	2.36999e-28	3.44e-30	0.886364	0.0854033	34	22	3	1
	chr10	27443273	27443422	TRUE	2.5097e-28	3.65e-30	0.883333	0.176251	52	15	5	3
	chr7	12726381	12726530	TRUE	2.60255e-28	3.8e-30	0.82	0.14145	60	30	3	2
	chr11	133938720	133938869	TRUE	2.60255e-28	3.8e-30	0.729167	0.109458	54	20	4	2
	chr2	172290627	172290776	TRUE	2.66739e-28	3.91e-30	0.964286	0.16846	41	28	2	1
	chr8	63998564	63998713	TRUE	2.66739e-28	3.91e-30	0.88	0.125505	44	25	3	1
	chr1	161719481	161719630	TRUE	2.67578e-28	3.93e-30	0.763158	0.133407	53	19	4	2
	chr2	86333238	86333387	TRUE	2.88801e-28	4.25e-30	0.94386	0.172281	49	19	4	2
	chr2	15701406	15701555	TRUE	2.9502e-28	4.35e-30	0.813828	0.133725	53	13	7	4
	chr16	67260853	67261002	TRUE	2.95123e-28	4.36e-30	0.833333	0.157834	63	20	6	3
	chr1	75198740	75198889	TRUE	3.0063e-28	4.45e-30	0.894737	0.165914	48	19	5	2
	chr1	53163990	53164139	TRUE	3.10836e-28	4.61e-30	0.968254	0.121441	37	21	2	1
	chr13	50018173	50018322	TRUE	3.16291e-28	4.7e-30	0.889583	0.156786	55	24	4	2
	chr6	43484654	43484803	TRUE	3.25084e-28	4.84e-30	0.871429	0.120763	47	14	7	3
	chr1	171750661	171750810	TRUE	3.31161e-28	4.94e-30	0.913889	0.192677	59	18	4	3
	chr10	99030373	99030522	TRUE	3.33869e-28	4.99e-30	0.622169	0.13266	102	15	13	6
	chr21	30365176	30365325	TRUE	3.34564e-28	5.01e-30	0.951389	0.121732	37	12	4	3
	chr1	28562511	28562660	TRUE	3.75247e-28	5.63e-30	0.891667	0.169565	55	20	5	2
	chr12	58138684	58138833	TRUE	3.83178e-28	5.76e-30	0.875	0.146122	47	18	4	2
	chr12	113796278	113796427	TRUE	4.03587e-28	6.08e-30	0.884058	0.114623	44	23	3	1
	chr13	24463511	24463660	TRUE	4.03587e-28	6.09e-30	0.919872	0.206897	59	26	4	2
	chr19	18668504	18668653	TRUE	4.29278e-28	6.49e-30	0.87807	0.152022	54	19	4	2
	chr20	443139	443288	TRUE	4.46948e-28	6.77e-30	0.824713	0.240181	72	29	4	2
	chr4	48655778	48655927	TRUE	4.59281e-28	6.97e-30	0.391705	0.0848769	130	31	8	4
	chr13	49822003	49822152	TRUE	4.74197e-28	7.21e-30	0.613889	0.114749	71	24	6	2
	chr1	38412681	38412830	TRUE	4.78554e-28	7.29e-30	0.953922	0.149471	43	17	5	2
	chr14	93214964	93215113	TRUE	4.85515e-28	7.41e-30	0.891667	0.149534	43	20	3	2
	chr11	118938393	118938542	TRUE	5.01971e-28	7.69e-30	0.799425	0.134075	60	29	4	2
	chr19	35264062	35264211	TRUE	5.01971e-28	7.69e-30	0.784807	0.135328	62	21	5	2
	chr1	44173118	44173267	TRUE	5.12107e-28	7.86e-30	0.903846	0.190795	49	26	3	1
	chr17	73663205	73663354	TRUE	5.16352e-28	7.94e-30	0.875	0.108096	39	20	4	1
	chr14	24610749	24610898	TRUE	5.66019e-28	8.72e-30	0.873626	0.22411	71	26	5	2
	chr3	122233704	122233853	TRUE	5.66909e-28	8.75e-30	0.929688	0.261572	60	32	3	1
	chr4	6711556	6711705	TRUE	5.68442e-28	8.79e-30	0.641182	0.145838	99	27	7	3
	chr2	64455502	64455651	TRUE	5.7707e-28	8.94e-30	0.728571	0.181484	69	35	4	1
	chr2	67624342	67624491	TRUE	6.15303e-28	9.55e-30	0.888889	0.102645	40	24	3	1
	chr7	151038758	151038907	TRUE	6.35388e-28	9.88e-30	0.825758	0.161811	67	33	2	2
	chr1	231376876	231377025	TRUE	6.38067e-28	9.94e-30	0.849359	0.136344	53	26	3	2
	chr9	36036816	36036965	TRUE	6.65141e-28	1.04e-29	0.878788	0.135752	43	22	1	1
	chr10	73975706	73975855	TRUE	6.65141e-28	1.04e-29	0.927778	0.150826	43	15	2	2
	chr9	108320311	108320460	TRUE	6.69077e-28	1.05e-29	0.766667	0.142948	72	27	5	2
	chr13	31736454	31736603	TRUE	6.69077e-28	1.05e-29	0.9125	0.29805	78	20	7	3
	chr15	41047399	41047548	TRUE	6.80575e-28	1.07e-29	0.905797	0.0892755	36	23	2	1
	chr3	182982990	182983139	TRUE	7.17426e-28	1.13e-29	0.624784	0.125827	92	22	8	4
	chr1	150601561	150601710	TRUE	7.22457e-28	1.14e-29	0.908889	0.116261	38	15	5	2
	chr4	83956139	83956288	TRUE	7.32463e-28	1.16e-29	0.882456	0.166896	52	19	4	2
	chr11	66056590	66056739	TRUE	7.32463e-28	1.16e-29	0.933333	0.162971	47	25	3	1
	chr1	155904140	155904289	TRUE	7.56348e-28	1.2e-29	0.8	0.124827	37	10	8	3
	chr5	137774676	137774825	TRUE	7.92729e-28	1.26e-29	0.776316	0.13326	56	38	2	1
	chr7	121513059	121513208	TRUE	7.97578e-28	1.27e-29	0.979167	0.143105	37	24	2	1
	chr6	42981877	42982026	TRUE	8.27485e-28	1.32e-29	0.9	0.192992	49	15	4	3
	chr10	85899085	85899234	TRUE	8.88573e-28	1.42e-29	0.894737	0.142533	48	19	5	2
	chr7	75508217	75508366	TRUE	9.05716e-28	1.45e-29	0.759259	0.144762	58	27	4	2
	chr11	65729060	65729209	TRUE	1.00386e-27	1.61e-29	0.839744	0.139563	57	26	4	2
	chr15	49170190	49170339	TRUE	1.02073e-27	1.64e-29	0.63985	0.0780977	68	19	6	3
	chr17	73663221	73663370	TRUE	1.03133e-27	1.66e-29	0.916667	0.110553	37	18	4	2
	chr17	2496823	2496972	TRUE	1.0605e-27	1.71e-29	0.944444	0.184267	45	24	2	1
	chr3	142297620	142297769	TRUE	1.10195e-27	1.78e-29	0.933333	0.201354	55	30	3	1
	chr18	3603636	3603785	TRUE	1.12471e-27	1.82e-29	0.788473	0.197756	91	17	11	5
	chr2	27545921	27546070	TRUE	1.23376e-27	2e-29	0.928571	0.0975577	33	14	4	2
	chr7	145813353	145813502	TRUE	1.39168e-27	2.26e-29	0.730645	0.178964	90	31	5	2
	chr12	95397463	95397612	TRUE	1.47528e-27	2.4e-29	0.88	0.159089	46	25	3	1
	chr3	121553878	121554027	TRUE	1.52177e-27	2.48e-29	0.954545	0.195704	49	22	4	2
	chr4	6711548	6711697	TRUE	1.54971e-27	2.53e-29	0.636538	0.143796	93	26	7	3
	chr2	26256874	26257023	TRUE	1.55922e-27	2.55e-29	0.9375	0.164319	42	20	2	2
	chr11	82611509	82611658	TRUE	1.62363e-27	2.66e-29	0.758667	0.174858	67	25	5	2
	chr17	49124191	49124340	TRUE	1.73655e-27	2.85e-29	0.830444	0.260623	102	25	8	4
	chr19	8008490	8008639	TRUE	1.80651e-27	2.97e-29	0.905797	0.159913	46	23	3	2
	chr7	6487537	6487686	TRUE	1.8155e-27	2.99e-29	0.687585	0.180337	104	28	7	3
	chr1	150602050	150602199	TRUE	1.83052e-27	3.02e-29	0.921569	0.199862	52	17	6	3
	chr7	151216962	151217111	TRUE	1.83339e-27	3.03e-29	0.902381	0.225464	56	14	7	4
	chr19	6361363	6361512	TRUE	1.83624e-27	3.04e-29	0.9375	0.140847	41	16	4	2
	chr4	113152795	113152944	TRUE	1.89336e-27	3.14e-29	0.966667	0.189899	48	30	3	1
	chr12	112279662	112279811	TRUE	2.06465e-27	3.43e-29	0.850529	0.10843	51	18	5	2
	chr11	67250421	67250570	TRUE	2.06709e-27	3.44e-29	0.85	0.100037	39	25	2	1
	chr11	82997366	82997515	TRUE	2.06952e-27	3.45e-29	0.879167	0.192427	62	20	6	3
	chr9	131592037	131592186	TRUE	2.16177e-27	3.61e-29	0.846667	0.169925	56	25	4	2
	chr3	135969067	135969216	TRUE	2.19991e-27	3.68e-29	0.835507	0.135599	54	23	4	2
	chr4	89378168	89378317	TRUE	2.26982e-27	3.81e-29	0.800595	0.148727	60	28	4	2
	chr19	41903208	41903357	TRUE	2.26982e-27	3.81e-29	0.727564	0.121008	65	26	4	2
	chr5	140027192	140027341	TRUE	2.45031e-27	4.12e-29	0.908333	0.133469	44	20	3	2
	chr7	99774942	99775091	TRUE	2.49956e-27	4.21e-29	0.865909	0.170448	62	22	5	2
	chr20	30102141	30102290	TRUE	2.59606e-27	4.38e-29	0.727273	0.153365	57	22	4	2
	chr7	1127623	1127772	TRUE	2.72182e-27	4.6e-29	0.688098	0.169522	130	20	12	6
	chr5	72143920	72144069	TRUE	2.72902e-27	4.62e-29	0.869048	0.134733	50	28	3	1
	chr1	235530628	235530777	TRUE	2.96617e-27	5.03e-29	0.746914	0.114666	57	27	4	2
	chr22	32870607	32870756	TRUE	3.00824e-27	5.11e-29	0.877193	0.108587	42	19	3	2
	chr11	63741979	63742128	TRUE	3.02667e-27	5.15e-29	0.988095	0.148801	37	21	3	1
	chr8	55014529	55014678	TRUE	3.34426e-27	5.7e-29	0.971875	0.167689	42	16	3	2
	chr15	72978435	72978584	TRUE	3.50844e-27	6e-29	0.917647	0.141205	47	17	5	2
	chr15	72978442	72978591	TRUE	3.50844e-27	6e-29	0.917647	0.141205	47	17	5	2
	chr2	152214005	152214154	TRUE	3.55509e-27	6.09e-29	0.600946	0.101482	89	13	13	6
	chr2	190526046	190526195	TRUE	3.58993e-27	6.16e-29	0.741333	0.109043	67	25	4	2
	chr19	21541694	21541843	TRUE	3.6072e-27	6.2e-29	0.865079	0.154161	49	21	4	2
	chr4	142141949	142142098	TRUE	3.6883e-27	6.35e-29	0.819444	0.0781766	42	18	5	2
	chr17	27169793	27169942	TRUE	3.8967e-27	6.72e-29	0.94697	0.158126	43	22	3	1
	chr17	12921311	12921460	TRUE	3.93653e-27	6.8e-29	0.871212	0.154505	49	22	4	2
	chr2	208576164	208576313	TRUE	3.94733e-27	6.83e-29	1	0.181467	38	22	2	1
	chr4	47916632	47916781	TRUE	3.99848e-27	6.93e-29	0.723333	0.177885	59	20	5	2
	chr3	49066827	49066976	TRUE	4.07827e-27	7.08e-29	0.715909	0.128698	56	22	4	2
	chr20	825185	825334	TRUE	4.18079e-27	7.27e-29	0.958333	0.129834	39	20	3	1
	chr2	85843183	85843332	TRUE	4.34613e-27	7.57e-29	0.933333	0.176255	43	20	4	2
	chr8	20054604	20054753	TRUE	4.40202e-27	7.68e-29	0.781667	0.12342	55	20	5	2
	chr11	33182989	33183138	TRUE	4.45041e-27	7.79e-29	0.833333	0.112122	46	22	4	2
	chr16	1832833	1832982	TRUE	4.45041e-27	7.79e-29	0.903846	0.201216	54	26	3	2
	chr5	140306202	140306351	TRUE	4.56859e-27	8.01e-29	0.772222	0.172576	60	30	3	2
	chr7	99102173	99102322	TRUE	4.64083e-27	8.15e-29	0.928571	0.161805	41	21	3	1
	chr22	35653389	35653538	TRUE	4.82654e-27	8.49e-29	1	0.141046	33	17	3	1
	chr10	68685692	68685841	TRUE	4.92083e-27	8.67e-29	0.747531	0.0917463	57	18	5	3
	chr1	202858215	202858364	TRUE	5.19613e-27	9.17e-29	0.980769	0.219984	46	26	2	1
	chr5	138629255	138629404	TRUE	5.54975e-27	9.81e-29	0.888889	0.102542	37	24	3	1
	chr9	102861282	102861431	TRUE	5.64805e-27	1e-28	0.961538	0.175049	40	13	6	3
	chr14	90421041	90421190	TRUE	5.75168e-27	1.02e-28	0.82598	0.162401	60	17	5	3
	chr9	115774424	115774573	TRUE	5.85496e-27	1.04e-28	0.480849	0.0813718	86	23	7	3
	chr9	131266871	131267020	TRUE	5.90171e-27	1.05e-28	0.643619	0.162881	80	25	6	3
	chr11	5706224	5706373	TRUE	5.94831e-27	1.06e-28	0.873626	0.168286	53	13	7	4
	chr16	87984938	87985087	TRUE	6.10681e-27	1.09e-28	0.907407	0.160073	43	27	3	1
	chr1	27816621	27816770	TRUE	6.32073e-27	1.13e-28	0.903333	0.137547	42	15	4	2
	chr7	134331455	134331604	TRUE	6.36643e-27	1.14e-28	0.865625	0.143555	49	16	5	3
	chr7	100209953	100210102	TRUE	6.46774e-27	1.16e-28	0.80119	0.179596	61	28	5	2
	chr3	122233736	122233885	TRUE	6.84707e-27	1.23e-28	0.911376	0.2803	64	27	4	2
	chr7	10979765	10979914	TRUE	6.94728e-27	1.25e-28	0.761458	0.151184	56	16	7	3
	chr7	148787821	148787970	TRUE	7.43561e-27	1.34e-28	0.725	0.164834	75	28	5	2
	chr14	51706786	51706935	TRUE	7.53457e-27	1.36e-28	0.790625	0.140777	56	16	7	3
	chr9	131644306	131644455	TRUE	7.79916e-27	1.41e-28	0.871429	0.18098	57	21	5	2
	chr13	20357035	20357184	TRUE	7.89723e-27	1.43e-28	0.795455	0.166198	68	22	4	3
	chr1	217804361	217804510	TRUE	8.27068e-27	1.5e-28	0.785088	0.131011	56	19	5	2
	chr3	8543411	8543560	TRUE	9.19346e-27	1.67e-28	0.795833	0.260719	94	32	5	2
	chr2	224810004	224810153	TRUE	9.34382e-27	1.7e-28	0.87963	0.181711	57	36	3	1
	chr1	169337094	169337243	TRUE	9.43884e-27	1.72e-28	0.763305	0.126784	62	17	7	3
	chr8	117778642	117778791	TRUE	9.46386e-27	1.73e-28	0.960784	0.13482	37	17	4	2
	chr11	18655972	18656121	TRUE	9.46386e-27	1.73e-28	0.95	0.159998	45	18	4	2
	chr17	42976715	42976864	TRUE	9.50362e-27	1.74e-28	0.72381	0.114395	66	28	4	2
	chr10	101945766	101945915	TRUE	9.81592e-27	1.8e-28	0.879365	0.145169	49	21	3	2
	chr1	230778158	230778307	TRUE	1.03995e-26	1.91e-28	0.772727	0.164023	54	33	3	1
	chr16	58426198	58426347	TRUE	1.07094e-26	1.97e-28	0.679545	0.0721306	54	22	4	2
	chr1	23694831	23694980	TRUE	1.11269e-26	2.05e-28	0.796552	0.212719	83	29	5	2
	chr7	158649169	158649318	TRUE	1.11638e-26	2.06e-28	0.702778	0.161404	74	36	4	2
	chr10	81838375	81838524	TRUE	1.17416e-26	2.17e-28	0.722222	0.103027	44	27	3	1
	chr15	89164489	89164638	TRUE	1.23177e-26	2.28e-28	0.965517	0.158633	40	29	2	1
	chr11	92931047	92931196	TRUE	1.29998e-26	2.41e-28	0.921053	0.166405	41	19	4	2
	chr17	5972337	5972486	TRUE	1.30335e-26	2.42e-28	0.614062	0.166343	107	32	6	3
	chr21	30396838	30396987	TRUE	1.34436e-26	2.5e-28	0.787719	0.117498	55	19	5	2
	chr12	11324165	11324314	TRUE	1.39061e-26	2.59e-28	0.816667	0.200214	62	30	4	2
	chr2	164592465	164592614	TRUE	1.39382e-26	2.6e-28	0.69734	0.233727	137	27	10	5
	chr8	107282373	107282522	TRUE	1.39703e-26	2.61e-28	0.933333	0.185135	46	30	2	1
	chr5	137548984	137549133	TRUE	1.39808e-26	2.62e-28	0.879167	0.107228	41	20	4	2
	chr11	64037434	64037583	TRUE	1.39808e-26	2.62e-28	0.92	0.212773	55	20	5	2
	chr7	72349836	72349985	TRUE	1.41193e-26	2.65e-28	0.826667	0.159605	57	25	4	2
	chr2	98262421	98262570	TRUE	1.45765e-26	2.74e-28	0.863043	0.188225	66	23	5	2
	chr17	40273334	40273483	TRUE	1.46073e-26	2.75e-28	0.852692	0.218373	84	23	6	3
	chr2	74682099	74682248	TRUE	1.56988e-26	2.96e-28	0.866667	0.160019	49	14	7	3
	chr3	194392863	194393012	TRUE	1.59397e-26	3.01e-28	0.77381	0.130733	52	21	5	2
	chr3	8543284	8543433	TRUE	1.59441e-26	3.02e-28	0.760753	0.219104	90	31	5	2
	chr4	103790035	103790184	TRUE	1.59441e-26	3.02e-28	0.9	0.120124	39	25	3	1
	chr1	146714191	146714340	TRUE	1.61308e-26	3.06e-28	0.883333	0.106188	37	20	3	1
	chr1	220263143	220263292	TRUE	1.64749e-26	3.13e-28	0.722386	0.108491	66	17	7	3
	chr1	156308233	156308382	TRUE	1.66602e-26	3.17e-28	0.756771	0.158458	66	32	4	2
	chr12	88536001	88536150	TRUE	1.76321e-26	3.36e-28	0.766026	0.199654	74	26	5	2
	chr15	77197696	77197845	TRUE	1.7658e-26	3.37e-28	0.982456	0.1488	36	19	3	1
	chr2	25194896	25195045	TRUE	1.85732e-26	3.55e-28	0.851587	0.195128	63	21	4	3
	chr15	71055802	71055951	TRUE	1.94856e-26	3.73e-28	0.939394	0.153119	39	33	2	1
	chr7	98741675	98741824	TRUE	1.95607e-26	3.75e-28	0.790323	0.149119	55	31	3	1
	chr1	27339279	27339428	TRUE	1.97919e-26	3.8e-28	0.882353	0.114951	34	17	2	2
	chr5	54455884	54456033	TRUE	2.05944e-26	3.96e-28	0.781746	0.145503	72	14	8	5
	chr6	11232850	11232999	TRUE	2.06367e-26	3.98e-28	0.672619	0.163135	86	28	6	3
	chr12	104350923	104351072	TRUE	2.06367e-26	3.98e-28	0.774306	0.1409	59	24	4	2
	chr1	1510214	1510363	TRUE	2.18161e-26	4.22e-28	0.886364	0.195494	52	22	4	2
	chr2	172290477	172290626	TRUE	2.18161e-26	4.22e-28	0.984127	0.117529	32	21	2	1
	chr10	91011612	91011761	TRUE	2.28161e-26	4.42e-28	0.8775	0.162395	47	20	3	2
	chr1	10003379	10003528	TRUE	2.28516e-26	4.44e-28	0.836111	0.155124	54	24	4	2
	chr9	108210225	108210374	TRUE	2.28516e-26	4.44e-28	0.938596	0.143958	40	19	4	2
	chr18	76829297	76829446	TRUE	2.37428e-26	4.62e-28	0.864583	0.13576	41	16	4	2
	chr15	90744462	90744611	TRUE	2.46315e-26	4.8e-28	0.903846	0.158929	42	26	2	1
	chr17	8191889	8192038	TRUE	2.53126e-26	4.94e-28	0.695402	0.131348	77	29	5	2
	chr4	39460565	39460714	TRUE	2.5787e-26	5.04e-28	0.912698	0.128845	42	21	4	2
	chr6	43484691	43484840	TRUE	2.60557e-26	5.1e-28	0.874359	0.123258	45	13	7	3
	chr1	10003386	10003535	TRUE	2.61195e-26	5.12e-28	0.836111	0.155631	54	24	4	2
	chr14	21945235	21945384	TRUE	2.64888e-26	5.2e-28	0.766667	0.159147	64	21	6	3
	chr17	34842373	34842522	TRUE	2.89933e-26	5.7e-28	0.934783	0.207437	46	23	3	2
	chr20	62711133	62711282	TRUE	2.94589e-26	5.8e-28	0.796875	0.171704	70	32	3	2
	chr11	107328524	107328673	TRUE	2.94667e-26	5.81e-28	0.693519	0.130406	67	18	7	3
	chr19	45542198	45542347	TRUE	3.38804e-26	6.69e-28	0.85	0.153621	61	20	6	3
	chr17	30469373	30469522	TRUE	3.50954e-26	6.94e-28	0.953125	0.186155	43	32	3	1
	chr12	120242234	120242383	TRUE	3.62564e-26	7.18e-28	0.637634	0.135976	81	31	5	2
	chr5	147763298	147763447	TRUE	3.71115e-26	7.36e-28	0.728571	0.0970237	57	21	5	2
	chr1	44820891	44821040	TRUE	3.74102e-26	7.43e-28	0.846667	0.131711	48	25	3	1
	chr3	99536581	99536730	TRUE	3.83617e-26	7.63e-28	0.727273	0.106044	65	22	5	2
	chr5	159546404	159546553	TRUE	3.91096e-26	7.79e-28	0.919048	0.169652	52	21	4	2
	chr5	137667468	137667617	TRUE	3.98554e-26	7.95e-28	0.637681	0.0921934	56	23	5	2
	chr14	96671035	96671184	TRUE	4.21509e-26	8.42e-28	0.761111	0.138255	65	30	3	2
	chr10	1779670	1779819	TRUE	4.329e-26	8.66e-28	0.96	0.164372	40	25	2	1
	chr7	766238	766387	TRUE	4.72712e-26	9.47e-28	0.87037	0.118869	44	18	3	2
	chr9	77112152	77112301	TRUE	4.87985e-26	9.79e-28	0.712025	0.144329	97	21	7	4
	chr17	40075224	40075373	TRUE	5.27604e-26	1.06e-27	0.829861	0.188878	57	24	4	2
	chr7	43769035	43769184	TRUE	5.66613e-26	1.14e-27	0.698333	0.126228	69	25	5	2
	chr1	52521873	52522022	TRUE	5.70767e-26	1.15e-27	0.982639	0.253418	52	24	4	2
	chr1	211848919	211849068	TRUE	5.88103e-26	1.19e-27	0.608696	0.103611	45	23	3	1
	chr3	58810097	58810246	TRUE	5.88103e-26	1.19e-27	0.420635	0.0993291	148	23	13	6
	chr12	49463727	49463876	TRUE	5.88103e-26	1.19e-27	0.875	0.153655	43	20	3	2
	chr11	94226992	94227141	TRUE	6.41555e-26	1.3e-27	0.944444	0.150662	38	18	4	2
	chr2	25194776	25194925	TRUE	6.75142e-26	1.37e-27	0.727273	0.177356	57	22	3	2
	chr3	189838670	189838819	TRUE	6.79108e-26	1.38e-27	0.811667	0.195376	76	30	4	2
	chr13	24844825	24844974	TRUE	7.42033e-26	1.51e-27	0.825362	0.115509	52	23	4	2
	chr20	30795596	30795745	TRUE	8.34223e-26	1.7e-27	0.873016	0.133244	42	21	3	2
	chr8	62602317	62602466	TRUE	8.57549e-26	1.75e-27	0.387996	0.0786351	160	28	11	5
	chr14	104387855	104388004	TRUE	8.61237e-26	1.76e-27	0.830392	0.1389	56	17	4	3
	chr2	54013968	54014117	TRUE	9.28438e-26	1.9e-27	0.964286	0.156386	36	14	4	2
	chr12	88535945	88536094	TRUE	1.01497e-25	2.08e-27	0.798246	0.190661	69	19	7	3
	chr10	104474142	104474291	TRUE	1.01842e-25	2.09e-27	0.935185	0.300897	71	36	3	1
	chr3	47422391	47422540	TRUE	1.02186e-25	2.1e-27	0.910256	0.167694	49	26	3	1
	chr1	45205390	45205539	TRUE	1.07875e-25	2.22e-27	0.9	0.167095	53	17	5	3
	chr11	57529169	57529318	TRUE	1.11606e-25	2.3e-27	0.759649	0.103899	43	19	4	2
	chr6	170862295	170862444	TRUE	1.17266e-25	2.42e-27	0.763889	0.132861	53	24	4	2
	chr8	101571964	101572113	TRUE	1.22425e-25	2.53e-27	0.729167	0.148656	50	16	4	3
	chr2	172864704	172864853	TRUE	1.25464e-25	2.6e-27	1	0.103598	27	26	1	1
	chr22	19132142	19132291	TRUE	1.25464e-25	2.6e-27	0.936364	0.106926	38	22	3	1
	chr21	34915147	34915296	TRUE	1.29627e-25	2.69e-27	0.872222	0.226933	65	24	5	2
	chr9	132565332	132565481	TRUE	1.35222e-25	2.81e-27	0.9	0.171482	45	25	3	1
	chr7	99036463	99036612	TRUE	1.35996e-25	2.83e-27	0.913194	0.161824	50	24	3	2
	chr1	231376819	231376968	TRUE	1.51165e-25	3.15e-27	0.841667	0.129471	45	20	3	2
	chr14	72887587	72887736	TRUE	1.52874e-25	3.19e-27	0.565751	0.121617	108	26	8	4
	chr5	145316042	145316191	TRUE	1.53142e-25	3.2e-27	0.449044	0.0657472	98	22	10	4
	chr6	52860092	52860241	TRUE	1.60101e-25	3.35e-27	0.756667	0.206351	89	25	7	3
	chr1	1260043	1260192	TRUE	1.60835e-25	3.37e-27	0.94	0.131046	35	25	2	1
	chr9	115983628	115983777	TRUE	1.69194e-25	3.55e-27	0.902174	0.142854	45	23	3	1
	chr12	110011400	110011549	TRUE	1.74435e-25	3.67e-27	1	0.131464	30	14	4	2
	chr15	41624792	41624941	TRUE	1.74435e-25	3.67e-27	0.901961	0.177887	48	17	5	2
	chr1	63249703	63249852	TRUE	1.78944e-25	3.77e-27	0.916667	0.160193	41	16	4	2
	chr7	105162637	105162786	TRUE	1.8344e-25	3.87e-27	0.923077	0.191755	50	26	3	1
	chr15	41047410	41047559	TRUE	1.85084e-25	3.91e-27	0.862319	0.0944501	36	23	2	1
	chr9	140083009	140083158	TRUE	1.88142e-25	3.98e-27	0.833333	0.116096	41	18	4	2
	chr2	176866970	176867119	TRUE	1.90247e-25	4.03e-27	0.894444	0.150498	44	18	4	2
	chr13	50656081	50656230	TRUE	1.95646e-25	4.15e-27	0.863528	0.18832	70	22	7	3
	chr19	36139055	36139204	TRUE	1.97265e-25	4.19e-27	0.856236	0.140616	54	21	5	2
	chr7	100210014	100210163	TRUE	1.98408e-25	4.22e-27	0.95	0.200795	41	20	5	2
	chr22	19842414	19842563	TRUE	1.9908e-25	4.24e-27	0.876667	0.164669	46	25	3	1
	chr20	31989289	31989438	TRUE	2.01156e-25	4.29e-27	0.906463	0.130441	37	14	5	2
	chr10	95462281	95462430	TRUE	2.04163e-25	4.36e-27	0.930208	0.14441	41	16	3	2
	chr3	179322475	179322624	TRUE	2.13241e-25	4.56e-27	0.879167	0.163699	54	20	5	2
	chr12	25403815	25403964	TRUE	2.2463e-25	4.81e-27	0.806452	0.168609	68	31	3	2
	chr16	58283763	58283912	TRUE	2.42518e-25	5.2e-27	0.759259	0.124625	44	27	2	1
	chr4	146019320	146019469	TRUE	2.52906e-25	5.43e-27	0.822464	0.117154	41	23	3	1
	chr2	219575543	219575692	TRUE	2.56289e-25	5.51e-27	0.846154	0.164303	52	26	3	2
	chr22	37172066	37172215	TRUE	2.57805e-25	5.55e-27	0.84127	0.145793	51	21	5	2
	chr3	126423018	126423167	TRUE	2.64419e-25	5.7e-27	0.810606	0.170775	53	22	4	2
	chr10	129796290	129796439	TRUE	2.66847e-25	5.76e-27	0.545179	0.0997896	93	20	9	4
	chr21	35288110	35288259	TRUE	2.67417e-25	5.78e-27	0.861458	0.170914	57	16	6	3
	chr2	219536709	219536858	TRUE	2.75379e-25	5.96e-27	0.878333	0.177022	56	20	5	2
	chr12	133757895	133758044	TRUE	2.80551e-25	6.08e-27	0.508532	0.112454	112	24	9	4
	chr17	58964263	58964412	TRUE	2.84327e-25	6.17e-27	0.8125	0.128655	50	32	3	1
	chr16	4303742	4303891	TRUE	2.89013e-25	6.28e-27	0.786559	0.16535	69	31	4	2
	chr15	40509529	40509678	TRUE	2.9047e-25	6.32e-27	0.512325	0.0916508	103	17	11	6
	chr10	126490254	126490403	TRUE	2.9743e-25	6.48e-27	0.873016	0.131169	41	21	3	1
	chr10	103543110	103543259	TRUE	2.9933e-25	6.53e-27	0.941667	0.167897	44	20	4	2
	chr13	24463494	24463643	TRUE	3.0443e-25	6.65e-27	0.895062	0.19894	53	27	3	1
	chr8	94712673	94712822	TRUE	3.06773e-25	6.71e-27	0.739394	0.177736	54	22	3	2
	chr19	39322449	39322598	TRUE	3.0774e-25	6.74e-27	0.872549	0.152062	48	17	5	2
	chr19	9546186	9546335	TRUE	3.13721e-25	6.88e-27	0.563492	0.118449	50	21	4	2
	chr22	18560586	18560735	TRUE	3.20141e-25	7.03e-27	0.867544	0.204031	56	19	5	2
	chr6	42952230	42952379	TRUE	3.29273e-25	7.24e-27	0.661458	0.188554	79	32	4	2
	chr9	131709877	131710026	TRUE	3.32023e-25	7.31e-27	1	0.143519	31	20	2	1
	chr7	134896223	134896372	TRUE	3.43384e-25	7.57e-27	0.868056	0.17405	47	24	3	1
	chr7	44621779	44621928	TRUE	3.45202e-25	7.62e-27	0.716667	0.116993	66	25	5	2
	chr8	94766972	94767121	TRUE	3.56516e-25	7.88e-27	0.757576	0.101846	52	22	4	2
	chr7	100797586	100797735	TRUE	3.99882e-25	8.85e-27	0.795833	0.14041	48	20	4	2
	chr2	209119122	209119271	TRUE	4.06132e-25	9e-27	0.769841	0.109339	50	21	4	2
	chr5	139682641	139682790	TRUE	4.09212e-25	9.08e-27	0.666667	0.0855739	52	18	5	2
	chr7	44621792	44621941	TRUE	4.16784e-25	9.26e-27	0.721014	0.123425	64	23	5	2
	chr5	133968479	133968628	TRUE	4.21639e-25	9.38e-27	0.962963	0.16372	36	27	2	1
	chr9	134000881	134001030	TRUE	4.26483e-25	9.5e-27	0.826087	0.179663	64	23	5	2
	chr2	118845950	118846099	TRUE	4.47902e-25	9.99e-27	0.988889	0.18893	39	18	4	2
	chr9	71394864	71395013	TRUE	4.88073e-25	1.09e-26	0.791667	0.115742	51	22	3	2
	chr15	41624771	41624920	TRUE	5.00862e-25	1.12e-26	0.893519	0.174571	49	18	5	2
	chr7	2394401	2394550	TRUE	5.27016e-25	1.18e-26	0.622109	0.206869	108	28	7	3
	chr16	14723991	14724140	TRUE	5.30801e-25	1.19e-26	0.868056	0.133449	41	24	3	1
	chr17	73851355	73851504	TRUE	6.05853e-25	1.36e-26	0.796296	0.112818	47	18	4	2
	chr21	44313278	44313427	TRUE	6.09527e-25	1.37e-26	0.944444	0.208053	44	27	2	1
	chr7	77325643	77325792	TRUE	6.13192e-25	1.38e-26	0.786232	0.151721	57	23	5	2
	chr1	54519063	54519212	TRUE	6.60383e-25	1.49e-26	0.844872	0.175747	49	13	5	3
	chr11	121163288	121163437	TRUE	6.60383e-25	1.49e-26	0.840909	0.134509	43	22	3	1
	chr11	47664049	47664198	TRUE	6.63969e-25	1.5e-26	1	0.164977	33	24	2	1
	chr11	112160824	112160973	TRUE	6.98493e-25	1.58e-26	0.958333	0.115132	30	12	2	2
	chr16	48278111	48278260	TRUE	7.02021e-25	1.59e-26	0.771739	0.124274	47	23	3	2
	chr14	32030491	32030640	TRUE	7.2318e-25	1.64e-26	0.672549	0.0923291	53	17	5	3
	chr5	172261123	172261272	TRUE	7.31072e-25	1.66e-26	0.814815	0.128707	44	18	4	2
	chr12	68726113	68726262	TRUE	7.38945e-25	1.68e-26	0.90625	0.135869	37	16	4	2
	chr12	120966916	120967065	TRUE	7.42405e-25	1.69e-26	0.753968	0.135493	45	21	4	2
	chr9	37800690	37800839	TRUE	7.98505e-25	1.82e-26	0.680208	0.120937	71	16	5	4
	chr13	77901129	77901278	TRUE	8.01881e-25	1.83e-26	0.857143	0.156093	50	21	2	2
	chr7	77428009	77428158	TRUE	8.35883e-25	1.91e-26	0.730247	0.219865	77	27	6	2
	chr17	22023975	22024124	TRUE	8.52317e-25	1.95e-26	0.514906	0.191143	117	6	35	19
	chr4	76439580	76439729	TRUE	8.81805e-25	2.02e-26	0.916667	0.175176	42	20	3	2
	chr3	127771112	127771261	TRUE	9.19939e-25	2.11e-26	0.895833	0.144553	38	24	2	1
	chr15	79603391	79603540	TRUE	9.23142e-25	2.12e-26	0.774359	0.149974	67	26	5	2
	chr13	73356130	73356279	TRUE	9.35035e-25	2.15e-26	0.947368	0.186958	41	19	4	2
	chr3	39093407	39093556	TRUE	9.38211e-25	2.16e-26	0.77193	0.0766724	36	19	3	1
	chr17	43239184	43239333	TRUE	9.80423e-25	2.26e-26	0.787356	0.183408	66	29	4	2
	chr9	74526323	74526472	TRUE	1.03553e-24	2.39e-26	0.792105	0.226292	74	19	8	3
	chr20	16710529	16710678	TRUE	1.05588e-24	2.44e-26	0.916667	0.114792	32	24	2	1
	chr1	115124217	115124366	TRUE	1.07617e-24	2.49e-26	0.734375	0.103496	58	16	6	3
	chr5	53813493	53813642	TRUE	1.08347e-24	2.51e-26	0.916667	0.240254	56	30	3	1
	chr1	28908318	28908467	TRUE	1.09506e-24	2.54e-26	0.804348	0.151387	51	23	4	2
	chr10	102027389	102027538	TRUE	1.11954e-24	2.6e-26	0.881944	0.115682	40	12	6	3
	chr2	29117433	29117582	TRUE	1.12246e-24	2.61e-26	0.973684	0.125729	31	19	2	1
	chr9	79009396	79009545	TRUE	1.16403e-24	2.71e-26	0.858333	0.194684	64	24	5	2
	chr15	74753462	74753611	TRUE	1.18404e-24	2.76e-26	0.837302	0.13255	48	21	4	2
	chr2	54014031	54014180	TRUE	1.264e-24	2.95e-26	0.961538	0.160664	35	13	4	2
	chr16	30194826	30194975	TRUE	1.27956e-24	2.99e-26	0.858929	0.200924	63	28	4	2
	chr11	46867878	46868027	TRUE	1.29936e-24	3.04e-26	0.903846	0.152345	41	26	3	1
	chr9	119449481	119449630	TRUE	1.31911e-24	3.09e-26	0.910256	0.129901	38	26	2	1
	chr4	100009883	100010032	TRUE	1.42408e-24	3.34e-26	0.790123	0.153949	55	27	3	2
	chr9	14910186	14910335	TRUE	1.4266e-24	3.35e-26	0.561667	0.0965407	64	30	4	2
	chr10	75313050	75313199	TRUE	1.47164e-24	3.46e-26	0.650992	0.133882	95	24	7	3
	chr17	77030372	77030521	TRUE	1.50383e-24	3.54e-26	0.866667	0.165179	51	20	4	2
	chr7	16793251	16793400	TRUE	1.51897e-24	3.58e-26	0.667857	0.0992943	57	14	4	4
	chr19	13261182	13261331	TRUE	1.72901e-24	4.08e-26	0.921569	0.133216	34	17	3	2
	chr10	97849938	97850087	TRUE	1.80732e-24	4.27e-26	0.610526	0.14521	57	19	5	3
	chr7	131012487	131012636	TRUE	1.89813e-24	4.49e-26	0.973684	0.119371	30	19	2	1
	chr3	49395743	49395892	TRUE	1.91694e-24	4.54e-26	0.884058	0.11633	36	23	2	1
	chr14	77843662	77843811	TRUE	1.94413e-24	4.61e-26	0.832773	0.260671	89	17	11	5
	chr1	53192081	53192230	TRUE	1.96705e-24	4.67e-26	0.888889	0.153271	43	24	2	1
	chr14	21737590	21737739	TRUE	2.00675e-24	4.77e-26	0.944444	0.163672	40	15	5	2
	chr5	60240856	60241005	TRUE	2.01693e-24	4.8e-26	0.788462	0.115201	45	13	6	3
	chr14	20929589	20929738	TRUE	2.14879e-24	5.12e-26	0.833333	0.119153	42	21	3	2
	chr11	8615758	8615907	TRUE	2.17136e-24	5.18e-26	0.7375	0.091092	46	12	3	3
	chr12	50794550	50794699	TRUE	2.18549e-24	5.22e-26	0.875	0.124588	39	16	4	2
	chr22	41636887	41637036	TRUE	2.19123e-24	5.24e-26	0.904762	0.196565	49	28	2	1
	chr1	161195733	161195882	TRUE	2.24289e-24	5.37e-26	0.920635	0.206349	48	21	3	2
	chr5	60240857	60241006	TRUE	2.36118e-24	5.66e-26	0.788462	0.115744	45	13	6	3
	chr17	37010005	37010154	TRUE	2.48336e-24	5.96e-26	0.811905	0.134241	46	14	5	3
	chr7	28997981	28998130	TRUE	2.50536e-24	6.02e-26	0.687879	0.195482	102	33	6	3
	chr2	201936344	201936493	TRUE	2.51899e-24	6.06e-26	0.861494	0.159144	61	29	4	2
	chr3	184279487	184279636	TRUE	2.52429e-24	6.08e-26	1	0.153664	31	22	2	1
	chr3	112738507	112738656	TRUE	2.64154e-24	6.37e-26	0.863636	0.140045	43	22	3	1
	chr16	15982399	15982548	TRUE	2.65496e-24	6.41e-26	0.722222	0.117344	52	27	3	1
	chr14	23058095	23058244	TRUE	2.86693e-24	6.93e-26	0.58254	0.112529	56	21	5	2
	chr11	119252420	119252569	TRUE	2.91724e-24	7.06e-26	0.842593	0.174842	50	18	5	2
	chr5	37379312	37379461	TRUE	3.01696e-24	7.31e-26	0.78	0.160944	63	25	4	2
	chr7	149570883	149571032	TRUE	3.10407e-24	7.53e-26	0.723077	0.192839	80	26	5	3
	chr4	138453581	138453730	TRUE	3.14981e-24	7.65e-26	0.825397	0.187356	56	21	5	2
	chr2	99797444	99797593	TRUE	3.25712e-24	7.92e-26	0.84359	0.126008	37	13	5	2
	chr1	1334642	1334791	TRUE	3.2825e-24	8.01e-26	0.944444	0.136081	34	27	1	1
	chr10	70660934	70661083	TRUE	3.2825e-24	8e-26	0.884259	0.246121	61	18	6	3
	chr21	34914368	34914517	TRUE	3.2825e-24	8.01e-26	0.774638	0.143007	58	23	5	2
	chr17	11501648	11501797	TRUE	3.28682e-24	8.03e-26	0.754762	0.114173	48	14	6	3
	chr16	2097890	2098039	TRUE	3.45467e-24	8.45e-26	1	0.136585	29	12	2	2
	chr3	169940120	169940269	TRUE	3.5282e-24	8.64e-26	0.881944	0.141236	43	24	3	1
	chr19	4969024	4969173	TRUE	3.59341e-24	8.81e-26	0.788242	0.19819	81	27	5	3
	chr9	96846660	96846809	TRUE	3.76031e-24	9.23e-26	0.594403	0.099104	87	19	9	4
	chr17	47785234	47785383	TRUE	3.78032e-24	9.29e-26	0.861111	0.162486	50	18	2	2
	chr16	58663702	58663851	TRUE	3.83281e-24	9.43e-26	0.933333	0.164738	42	20	4	2
	chr13	97874474	97874623	TRUE	4.10034e-24	1.01e-25	0.802083	0.132013	49	16	4	3
	chr20	61904065	61904214	TRUE	4.29831e-24	1.06e-25	0.782609	0.169602	51	23	4	2
	chr7	150777903	150778052	TRUE	4.33381e-24	1.07e-25	0.767677	0.202433	78	33	4	2
	chr12	110939996	110940145	TRUE	4.45014e-24	1.1e-25	0.868056	0.195149	57	24	4	2
	chr6	166796438	166796587	TRUE	4.48538e-24	1.11e-25	0.96	0.25703	52	25	2	2
	chr1	160232190	160232339	TRUE	4.71688e-24	1.17e-25	0.582738	0.145019	70	28	4	2
	chr4	39460520	39460669	TRUE	4.71688e-24	1.17e-25	0.873016	0.12332	44	21	4	2
	chr12	94071051	94071200	TRUE	4.86686e-24	1.21e-25	0.785119	0.0841966	49	12	8	4
	chr19	46580839	46580988	TRUE	4.86686e-24	1.21e-25	0.77381	0.122207	42	16	4	2
	chr12	117175996	117176145	TRUE	5.22282e-24	1.3e-25	0.775641	0.147881	55	26	4	2
	chr12	57039804	57039953	TRUE	5.29705e-24	1.32e-25	0.833333	0.164948	44	19	4	2
	chr6	26383254	26383403	TRUE	5.45128e-24	1.36e-25	0.677922	0.0933114	36	11	6	3
	chr17	43138580	43138729	TRUE	5.56512e-24	1.39e-25	0.8075	0.190363	66	20	6	3
	chr10	95256269	95256418	TRUE	6.15858e-24	1.54e-25	0.916667	0.244656	50	18	4	2
	chr21	37692406	37692555	TRUE	6.31129e-24	1.58e-25	0.9	0.146347	51	15	6	3
	chr11	9406104	9406253	TRUE	6.62325e-24	1.66e-25	0.736842	0.0978052	40	19	4	2
	chr3	159557662	159557811	TRUE	6.73522e-24	1.69e-25	0.805128	0.197021	69	26	4	2
	chr9	37592546	37592695	TRUE	6.84694e-24	1.72e-25	0.777536	0.161909	59	23	5	2
	chr7	38948752	38948901	TRUE	6.9584e-24	1.75e-25	0.788333	0.106513	43	10	8	4
	chr12	57146098	57146247	TRUE	7.06961e-24	1.78e-25	0.865385	0.165484	46	26	3	1
	chr9	132597524	132597673	TRUE	7.21201e-24	1.82e-25	0.86	0.158476	45	25	2	1
	chr19	18682514	18682663	TRUE	7.21201e-24	1.82e-25	1	0.168594	32	18	3	1
	chr8	40010889	40011038	TRUE	7.24339e-24	1.83e-25	0.736508	0.101962	52	12	8	4
	chr1	20834626	20834775	TRUE	7.27469e-24	1.84e-25	0.916667	0.0986913	33	16	3	2
	chr7	98923410	98923559	TRUE	7.46389e-24	1.89e-25	0.759158	0.162249	59	26	5	2
	chr13	37393239	37393388	TRUE	7.57377e-24	1.92e-25	0.686	0.101453	55	25	3	2
	chr20	13765517	13765666	TRUE	7.7622e-24	1.97e-25	0.877778	0.11418	35	15	4	2
	chr19	14117049	14117198	TRUE	7.91085e-24	2.01e-25	0.850877	0.160488	41	19	4	2
	chr1	117041786	117041935	TRUE	8.01985e-24	2.04e-25	0.664107	0.108493	70	20	6	3
	chr9	100395605	100395754	TRUE	8.05007e-24	2.05e-25	0.809804	0.231951	58	17	6	3
	chr15	75932547	75932696	TRUE	8.31556e-24	2.12e-25	1	0.140992	29	12	4	2
	chr6	31865464	31865613	TRUE	8.42374e-24	2.15e-25	0.84	0.144899	41	25	3	1
	chr7	55756946	55757095	TRUE	8.52209e-24	2.18e-25	0.655643	0.135298	109	24	6	4
	chr11	94227053	94227202	TRUE	8.52209e-24	2.18e-25	0.909091	0.162692	39	22	3	1
	chr6	33239752	33239901	TRUE	8.66871e-24	2.22e-25	0.81746	0.179431	58	21	5	2
	chr1	26438226	26438375	TRUE	8.89302e-24	2.28e-25	0.941176	0.188135	37	17	3	2
	chr7	116654853	116655002	TRUE	8.96099e-24	2.3e-25	0.348661	0.114253	256	21	24	12
	chr3	11685350	11685499	TRUE	9.18447e-24	2.36e-25	0.814815	0.248535	87	27	4	3
	chr19	42724227	42724376	TRUE	9.21308e-24	2.37e-25	0.838095	0.19798	59	21	5	2
	chr13	92050787	92050936	TRUE	9.39695e-24	2.42e-25	0.820513	0.0923724	39	26	2	1
	chr2	65593883	65594032	TRUE	9.65798e-24	2.49e-25	0.597222	0.102337	83	12	14	6
	chr1	54665698	54665847	TRUE	9.72471e-24	2.51e-25	0.866667	0.115724	31	15	3	2
	chr2	192542762	192542911	TRUE	9.9074e-24	2.56e-25	0.877193	0.19933	46	19	4	2
	chr17	42422391	42422540	TRUE	1.06309e-23	2.75e-25	0.911111	0.123433	34	15	4	2
	chr8	19674818	19674967	TRUE	1.08122e-23	2.8e-25	0.882576	0.167565	54	22	4	2
	chr9	140473339	140473488	TRUE	1.0993e-23	2.85e-25	0.8775	0.160935	43	20	4	2
	chr11	125366075	125366224	TRUE	1.10965e-23	2.88e-25	0.924242	0.247981	50	33	2	1
	chr22	24863106	24863255	TRUE	1.13536e-23	2.95e-25	0.616092	0.124425	100	29	6	3
	chr3	158288883	158289032	TRUE	1.18277e-23	3.08e-25	0.805556	0.131398	37	18	3	2
	chr3	158288884	158289033	TRUE	1.18277e-23	3.08e-25	0.805556	0.131398	37	18	3	2
	chr6	42847571	42847720	TRUE	1.26203e-23	3.29e-25	0.733333	0.134583	54	17	6	3
	chr3	118959704	118959853	TRUE	1.29129e-23	3.37e-25	0.92	0.142397	34	25	1	1
	chr11	17229482	17229631	TRUE	1.32049e-23	3.45e-25	0.780247	0.173198	66	27	4	2
	chr7	73097733	73097882	TRUE	1.34198e-23	3.51e-25	0.730159	0.124769	54	21	5	2
	chr9	131644291	131644440	TRUE	1.34814e-23	3.53e-25	0.827193	0.174813	55	19	5	2
	chr1	41174938	41175087	TRUE	1.39473e-23	3.66e-25	0.720022	0.160994	89	22	8	4
	chr20	32274162	32274311	TRUE	1.39473e-23	3.66e-25	0.916667	0.188942	42	24	3	1
	chr13	103249186	103249335	TRUE	1.41224e-23	3.71e-25	0.758621	0.16924	56	29	3	1
	chr15	74284587	74284736	TRUE	1.46773e-23	3.86e-25	0.891304	0.101278	33	23	2	1
	chr14	102771483	102771632	TRUE	1.55728e-23	4.1e-25	0.698925	0.180245	69	31	4	2
	chr9	96846646	96846795	TRUE	1.60111e-23	4.22e-25	0.620215	0.0987642	79	17	9	4
	chr7	134464071	134464220	TRUE	1.61832e-23	4.27e-25	0.361069	0.104993	220	29	15	7
	chr11	73882016	73882165	TRUE	1.62413e-23	4.29e-25	0.815972	0.19436	58	24	4	2
	chr7	72395560	72395709	TRUE	1.63371e-23	4.32e-25	0.886806	0.181937	56	24	5	2
	chr16	31106228	31106377	TRUE	1.63949e-23	4.34e-25	0.945833	0.179292	43	20	4	2
	chr3	183903763	183903912	TRUE	1.65658e-23	4.39e-25	0.8125	0.162003	47	24	3	1
	chr19	20188703	20188852	TRUE	1.7151e-23	4.55e-25	0.61875	0.141105	70	24	5	2
	chr8	42995492	42995641	TRUE	1.7509e-23	4.65e-25	0.903846	0.125568	34	26	2	1
	chr5	60240934	60241083	TRUE	1.81671e-23	4.83e-25	0.570513	0.126903	78	26	5	3
	chr1	10003339	10003488	TRUE	1.89365e-23	5.04e-25	0.713043	0.149471	58	23	4	2
	chr7	102937773	102937922	TRUE	1.92538e-23	5.13e-25	0.544258	0.113896	81	17	8	4
	chr1	14075756	14075905	TRUE	1.93456e-23	5.16e-25	0.898148	0.133509	37	18	3	2
	chr14	20881532	20881681	TRUE	1.9512e-23	5.21e-25	0.929825	0.12725	32	19	3	1
	chr16	53132972	53133121	TRUE	2.04263e-23	5.46e-25	0.766667	0.12034	53	18	3	2
	chr10	21786165	21786314	TRUE	2.09649e-23	5.61e-25	0.910714	0.214869	50	28	3	1
	chr8	32785388	32785537	TRUE	2.10544e-23	5.64e-25	0.534014	0.0870649	62	14	6	4
	chr1	161284066	161284215	TRUE	2.13301e-23	5.72e-25	0.861111	0.119693	39	12	4	3
	chr22	43539355	43539504	TRUE	2.20151e-23	5.91e-25	0.865079	0.123824	45	14	4	3
	chr7	92219658	92219807	TRUE	2.28474e-23	6.14e-25	0.768966	0.198341	74	29	5	2
	chr9	33076666	33076815	TRUE	2.28973e-23	6.16e-25	1	0.146272	29	13	4	2
	chr7	105221899	105222048	TRUE	2.37016e-23	6.39e-25	0.833333	0.105571	37	15	4	2
	chr10	64564416	64564565	TRUE	2.37016e-23	6.39e-25	0.655172	0.122917	55	29	3	1
	chr3	119396195	119396344	TRUE	2.64923e-23	7.15e-25	0.911765	0.15196	37	17	4	2
	chr21	45432106	45432255	TRUE	2.78336e-23	7.52e-25	0.706452	0.189711	83	31	5	2
	chr16	53537122	53537271	TRUE	2.82847e-23	7.65e-25	0.833333	0.149602	56	26	3	2
	chr19	11639882	11640031	TRUE	2.85501e-23	7.73e-25	0.829861	0.179436	61	24	4	2
	chr19	57276612	57276761	TRUE	2.85936e-23	7.75e-25	0.708333	0.0971117	55	22	4	2
	chr11	119252388	119252537	TRUE	2.88213e-23	7.82e-25	0.888889	0.174386	42	15	5	2
	chr20	37075228	37075377	TRUE	3.03003e-23	8.23e-25	0.609375	0.0893512	55	32	3	1
	chr13	53029395	53029544	TRUE	3.08568e-23	8.39e-25	0.76087	0.133182	48	23	3	2
	chr12	54019730	54019879	TRUE	3.12283e-23	8.5e-25	0.809656	0.159214	52	18	5	2
	chr5	138210961	138211110	TRUE	3.15624e-23	8.6e-25	0.646637	0.206712	113	19	11	5
	chr7	5938241	5938390	TRUE	3.15658e-23	8.61e-25	0.973684	0.132241	30	19	2	1
	chr3	10157233	10157382	TRUE	3.32172e-23	9.07e-25	0.706667	0.141463	58	25	4	2
	chr19	57922429	57922578	TRUE	3.32189e-23	9.08e-25	0.912281	0.143368	40	19	3	2
	chr11	46722072	46722221	TRUE	3.40611e-23	9.32e-25	0.859848	0.140092	49	22	4	2
	chr12	62586503	62586652	TRUE	3.45364e-23	9.46e-25	0.719298	0.14161	58	19	5	3
	chr9	119449465	119449614	TRUE	3.50473e-23	9.61e-25	0.902778	0.120284	35	24	2	1
	chr15	34394005	34394154	TRUE	3.53385e-23	9.7e-25	0.904762	0.129938	32	21	2	1
	chr4	103789984	103790133	TRUE	3.8819e-23	1.07e-24	0.840909	0.113579	36	22	3	1
	chr6	27775877	27776026	TRUE	3.8819e-23	1.07e-24	0.46544	0.146922	120	22	10	5
	chr18	21017877	21018026	TRUE	3.8819e-23	1.07e-24	0.869048	0.151641	45	28	2	1
	chr21	45759237	45759386	TRUE	3.8819e-23	1.07e-24	0.946667	0.198691	40	25	3	1
	chr1	53392848	53392997	TRUE	3.98658e-23	1.1e-24	0.846154	0.117685	42	26	3	1
	chr19	47987473	47987622	TRUE	4.01864e-23	1.11e-24	0.696296	0.181536	63	27	4	2
	chr1	114447693	114447842	TRUE	4.07832e-23	1.13e-24	0.916667	0.121016	33	13	4	2
	chr5	34915683	34915832	TRUE	4.07832e-23	1.13e-24	0.875	0.15903	44	20	4	2
	chr10	72142334	72142483	TRUE	4.07832e-23	1.13e-24	0.83	0.229528	54	25	3	2
	chr7	65215863	65216012	TRUE	4.2183e-23	1.17e-24	0.847222	0.147494	50	24	3	2
	chr14	77279182	77279331	TRUE	4.24995e-23	1.18e-24	0.931818	0.152804	39	22	3	1
	chr18	19180645	19180794	TRUE	4.42546e-23	1.23e-24	0.760417	0.179973	55	24	4	2
	chr15	65503792	65503941	TRUE	4.45683e-23	1.24e-24	0.639785	0.131229	61	31	3	1
	chr20	3827349	3827498	TRUE	4.59585e-23	1.28e-24	0.946429	0.16107	40	28	2	1
	chr1	43637926	43638075	TRUE	4.69387e-23	1.31e-24	0.75463	0.123499	48	18	5	2
	chr18	51795749	51795898	TRUE	4.69387e-23	1.31e-24	0.815789	0.0978824	32	19	3	1
	chr1	36023293	36023442	TRUE	4.9396e-23	1.38e-24	0.947368	0.197851	37	19	2	1
	chr15	64648394	64648543	TRUE	5.00604e-23	1.4e-24	0.752273	0.157892	57	22	5	2
	chr17	41561234	41561383	TRUE	5.10807e-23	1.43e-24	0.969697	0.134595	30	11	5	2
	chr19	24269876	24270025	TRUE	5.67377e-23	1.59e-24	0.864444	0.123556	39	15	4	2
	chr2	88926946	88927095	TRUE	5.73925e-23	1.61e-24	0.810952	0.213313	80	25	6	3
	chr2	74153853	74154002	TRUE	5.76309e-23	1.62e-24	0.910714	0.0908612	31	14	3	2
	chr19	35264086	35264235	TRUE	5.76309e-23	1.62e-24	0.748942	0.141843	56	18	5	3
	chr17	38375509	38375658	TRUE	6.04151e-23	1.7e-24	0.933333	0.180568	40	20	3	2
	chr3	50329871	50330020	TRUE	6.17736e-23	1.74e-24	1	0.161452	30	13	3	2
	chr7	6523801	6523950	TRUE	6.27746e-23	1.77e-24	0.847222	0.182818	47	24	3	1
	chr13	95254004	95254153	TRUE	6.30649e-23	1.78e-24	0.849462	0.149106	50	31	2	1
	chr14	45553202	45553351	TRUE	6.44165e-23	1.82e-24	0.848765	0.161629	50	27	3	1
	chr6	46620579	46620728	TRUE	6.61189e-23	1.87e-24	0.742063	0.0992021	44	21	3	2
	chr7	73703705	73703854	TRUE	6.85243e-23	1.94e-24	0.796875	0.158669	64	32	3	2
	chr7	42971902	42972051	TRUE	6.88077e-23	1.95e-24	0.643367	0.185617	123	28	9	4
	chr12	6579795	6579944	TRUE	6.9443e-23	1.97e-24	0.843333	0.144217	51	25	3	2
	chr12	56862201	56862350	TRUE	7.07813e-23	2.01e-24	0.972222	0.168023	36	24	3	1
	chr2	29093117	29093266	TRUE	7.10615e-23	2.02e-24	0.894231	0.13907	39	26	3	1
	chr1	119683247	119683396	TRUE	7.66127e-23	2.18e-24	0.868421	0.190986	48	19	3	2
	chr12	122326546	122326695	TRUE	8.07483e-23	2.3e-24	0.833333	0.147669	44	24	3	1
	chr19	23941645	23941794	TRUE	8.38235e-23	2.39e-24	0.931373	0.18227	40	17	3	2
	chr22	41865029	41865178	TRUE	8.47902e-23	2.42e-24	0.916667	0.168962	36	15	4	2
	chr16	30621634	30621783	TRUE	8.61049e-23	2.46e-24	0.869048	0.176474	48	21	4	2
	chr14	31889689	31889838	TRUE	8.91654e-23	2.55e-24	0.684524	0.166579	67	28	3	2
	chr12	14538147	14538296	TRUE	9.22198e-23	2.64e-24	0.723395	0.159315	92	23	7	4
	chr13	100153628	100153777	TRUE	9.35231e-23	2.68e-24	0.795635	0.214444	76	24	5	3
	chr13	21348009	21348158	TRUE	9.44753e-23	2.71e-24	0.891304	0.132485	36	23	2	1
	chr12	98897585	98897734	TRUE	9.85599e-23	2.83e-24	0.936508	0.195481	39	21	3	1
	chr13	51796407	51796556	TRUE	1.01941e-22	2.93e-24	0.88	0.155786	43	25	2	1
	chr1	36348710	36348859	TRUE	1.02432e-22	2.95e-24	0.76	0.152192	52	25	3	2
	chr1	43637883	43638032	TRUE	1.02432e-22	2.95e-24	0.655556	0.118354	78	24	6	3
	chr20	524434	524583	TRUE	1.04758e-22	3.02e-24	0.809524	0.158689	53	21	4	2
	chr4	76912065	76912214	TRUE	1.05e-22	3.03e-24	0.673913	0.148838	67	23	5	2
	chr1	154155611	154155760	TRUE	1.07319e-22	3.1e-24	1	0.154646	29	15	3	1
	chr7	102036704	102036853	TRUE	1.07558e-22	3.11e-24	0.766667	0.17397	61	25	4	2
	chr2	201936362	201936511	TRUE	1.1056e-22	3.2e-24	0.856548	0.162247	59	28	4	2
	chr16	69458398	69458547	TRUE	1.15283e-22	3.34e-24	0.631009	0.118887	55	14	7	3
	chr3	30647894	30648043	TRUE	1.16893e-22	3.39e-24	0.757576	0.0921609	41	22	3	1
	chr20	18547982	18548131	TRUE	1.20911e-22	3.51e-24	0.833333	0.120439	40	20	3	2
	chr11	47788945	47789094	TRUE	1.24233e-22	3.61e-24	0.763636	0.185672	61	22	5	2
	chr20	10414818	10414967	TRUE	1.25829e-22	3.66e-24	0.696296	0.19334	68	27	5	2
	chr6	30539070	30539219	TRUE	1.27078e-22	3.7e-24	0.8	0.15023	46	25	3	1
	chr1	224544495	224544644	TRUE	1.3107e-22	3.82e-24	0.838235	0.135276	42	17	5	2
	chr2	220325448	220325597	TRUE	1.3197e-22	3.85e-24	0.964286	0.148645	31	14	2	2
	chr21	39288648	39288797	TRUE	1.35607e-22	3.96e-24	0.647826	0.132515	90	23	6	3
	chr7	44621761	44621910	TRUE	1.36157e-22	3.98e-24	0.676667	0.117139	64	25	5	2
	chr19	572437	572586	TRUE	1.37391e-22	4.02e-24	0.771212	0.210428	59	22	5	2
	chr4	139936843	139936992	TRUE	1.41695e-22	4.15e-24	0.891304	0.142391	37	23	3	1
	chr5	150284343	150284492	TRUE	1.45308e-22	4.26e-24	0.505797	0.0850638	88	23	7	3
	chr15	90792664	90792813	TRUE	1.46869e-22	4.31e-24	0.634409	0.128618	77	31	4	2
	chr14	24615807	24615956	TRUE	1.52513e-22	4.48e-24	0.924074	0.17337	43	18	4	2
	chr7	66460540	66460689	TRUE	1.53044e-22	4.5e-24	0.713333	0.197282	76	20	7	3
	chr3	113465048	113465197	TRUE	1.57651e-22	4.64e-24	1	0.243194	38	24	3	1
	chr1	169396622	169396771	TRUE	1.61231e-22	4.75e-24	0.746377	0.11318	49	23	3	2
	chr2	239228982	239229131	TRUE	1.61413e-22	4.76e-24	0.928571	0.160817	37	28	2	1
	chr15	75871577	75871726	TRUE	1.64644e-22	4.86e-24	0.809524	0.207511	52	28	3	1
	chr19	41869989	41870138	TRUE	1.6753e-22	4.95e-24	0.728261	0.16515	61	23	5	2
	chr1	87380059	87380208	TRUE	1.69057e-22	5e-24	0.967593	0.181366	37	18	4	2
	chr21	15755461	15755610	TRUE	1.72947e-22	5.12e-24	0.885417	0.152755	36	16	4	2
	chr7	43909097	43909246	TRUE	1.74129e-22	5.16e-24	0.934783	0.17791	39	23	3	1
	chr17	42092297	42092446	TRUE	1.76657e-22	5.24e-24	1	0.177428	31	15	4	2
	chr17	17380200	17380349	TRUE	1.84727e-22	5.49e-24	0.935897	0.111089	29	13	4	2
	chr19	14016952	14017101	TRUE	1.84727e-22	5.49e-24	0.69	0.145539	61	25	4	2
	chr14	100259645	100259794	TRUE	1.85557e-22	5.52e-24	0.965517	0.187577	35	29	2	1
	chr19	46498239	46498388	TRUE	1.9008e-22	5.66e-24	0.595238	0.102619	58	21	5	2
	chr1	76251786	76251935	TRUE	2.06336e-22	6.15e-24	0.672222	0.131618	88	27	6	3
	chr6	28092287	28092436	TRUE	2.06473e-22	6.16e-24	0.603616	0.0970553	70	27	4	2
	chr4	68411208	68411357	TRUE	2.08283e-22	6.22e-24	0.929825	0.153668	36	19	3	1
	chr22	40573829	40573978	TRUE	2.1377e-22	6.39e-24	0.728231	0.206621	70	14	10	5
	chr2	86333230	86333379	TRUE	2.14233e-22	6.41e-24	0.838596	0.173664	47	19	4	2
	chr15	34630217	34630366	TRUE	2.24378e-22	6.72e-24	0.839506	0.240505	59	27	3	2
	chr11	82996993	82997142	TRUE	2.28833e-22	6.86e-24	0.839216	0.138624	44	17	5	2
	chr11	77899616	77899765	TRUE	2.29947e-22	6.9e-24	0.897436	0.18307	44	26	3	1
	chr5	137475084	137475233	TRUE	2.36386e-22	7.1e-24	0.529167	0.10327	77	22	6	3
	chr3	49466709	49466858	TRUE	2.38156e-22	7.16e-24	0.825397	0.159714	45	21	3	2
	chr1	145470408	145470557	TRUE	2.38593e-22	7.18e-24	0.677778	0.138808	44	15	5	2
	chr1	33282943	33283092	TRUE	2.53304e-22	7.63e-24	0.944444	0.146136	35	24	2	1
	chr17	26662686	26662835	TRUE	2.5439e-22	7.67e-24	0.970588	0.225296	39	17	2	2
	chr19	20150229	20150378	TRUE	2.55141e-22	7.7e-24	0.728571	0.129588	58	21	5	2
	chr9	37800684	37800833	TRUE	2.64168e-22	7.98e-24	0.617708	0.121288	69	16	5	4
	chr3	10028474	10028623	TRUE	2.65901e-22	8.04e-24	0.75	0.110376	45	20	3	2
	chr6	37467652	37467801	TRUE	2.68622e-22	8.13e-24	0.966667	0.114528	27	15	2	1
	chr16	25122947	25123096	TRUE	2.69688e-22	8.17e-24	0.864198	0.181624	54	27	3	2
	chr11	74699643	74699792	TRUE	2.78336e-22	8.44e-24	0.788095	0.131985	50	21	4	2
	chr2	32390833	32390982	TRUE	2.80379e-22	8.51e-24	0.942222	0.155163	36	15	3	2
	chr16	103729	103878	TRUE	2.86038e-22	8.69e-24	0.861111	0.208235	56	30	2	1
	chr19	18314791	18314940	TRUE	2.89056e-22	8.79e-24	0.896667	0.175092	47	25	3	1
	chr18	42792860	42793009	TRUE	2.97982e-22	9.07e-24	0.570536	0.0957967	89	24	7	3
	chr5	7869117	7869266	TRUE	3.148e-22	9.6e-24	0.865079	0.0986309	33	21	2	1
	chr9	131644263	131644412	TRUE	3.148e-22	9.6e-24	0.810833	0.169827	54	20	4	2
	chr15	44038448	44038597	TRUE	3.16142e-22	9.65e-24	1	0.160831	29	17	2	1
	chr9	139760690	139760839	TRUE	3.25009e-22	9.93e-24	0.722222	0.104489	39	21	2	1
	chr10	104474198	104474347	TRUE	3.26685e-22	1e-23	0.955556	0.334403	63	30	4	2
	chr12	97300916	97301065	TRUE	3.26685e-22	1e-23	0.73913	0.0952311	36	23	2	1
	chr1	89149822	89149971	TRUE	3.29643e-22	1.01e-23	0.867816	0.17624	45	29	2	1
	chr1	36863445	36863594	TRUE	3.45637e-22	1.06e-23	0.89127	0.189633	51	21	3	2
	chr15	59063293	59063442	TRUE	3.48572e-22	1.07e-23	0.859848	0.215708	57	22	5	2
	chr1	222885806	222885955	TRUE	3.515e-22	1.08e-23	0.9	0.169785	42	25	2	1
	chr14	69865036	69865185	TRUE	3.54423e-22	1.09e-23	0.596374	0.167488	104	22	9	4
	chr17	45908855	45909004	TRUE	3.60589e-22	1.11e-23	0.876667	0.138894	40	15	3	2
	chr9	70490129	70490278	TRUE	3.63499e-22	1.12e-23	0.891304	0.122165	34	23	2	1
	chr22	18043083	18043232	TRUE	3.69645e-22	1.14e-23	0.762698	0.192682	78	21	7	3
	chr1	2322945	2323094	TRUE	3.72193e-22	1.15e-23	0.833333	0.169095	46	23	3	2
	chr5	72143830	72143979	TRUE	3.72193e-22	1.15e-23	0.833333	0.108573	36	13	4	2
	chr11	84028332	84028481	TRUE	3.77963e-22	1.17e-23	0.441111	0.115513	78	30	5	2
	chr15	70390208	70390357	TRUE	3.77963e-22	1.17e-23	0.648512	0.160509	75	24	5	3
	chr15	64679920	64680069	TRUE	3.8084e-22	1.18e-23	0.757143	0.136445	47	14	5	3
	chr12	56367762	56367911	TRUE	3.83712e-22	1.19e-23	0.863636	0.208456	47	22	3	2
	chr5	16465846	16465995	TRUE	3.89439e-22	1.21e-23	0.933333	0.125845	28	15	3	1
	chr12	69633217	69633366	TRUE	3.89439e-22	1.21e-23	0.840278	0.0886679	35	24	2	1
	chr9	136344170	136344319	TRUE	3.92294e-22	1.22e-23	0.779279	0.202734	63	37	3	1
	chr10	74033577	74033726	TRUE	4.04782e-22	1.26e-23	0.93125	0.277714	62	24	4	2
	chr8	104033148	104033297	TRUE	4.10828e-22	1.28e-23	0.78125	0.119637	41	32	2	1
	chr12	69201880	69202029	TRUE	4.16863e-22	1.3e-23	0.8125	0.114233	31	16	3	1
	chr11	77850651	77850800	TRUE	4.19683e-22	1.31e-23	0.891304	0.140087	34	23	2	1
	chr11	13690171	13690320	TRUE	4.32099e-22	1.35e-23	0.98	0.201793	36	25	2	1
	chr18	32173182	32173331	TRUE	4.44493e-22	1.39e-23	0.71	0.141912	53	15	7	3
	chr14	74181080	74181229	TRUE	4.56865e-22	1.43e-23	0.890805	0.197376	54	29	3	1
	chr9	124922090	124922239	TRUE	4.69213e-22	1.47e-23	0.572024	0.136642	81	20	7	4
	chr6	26402381	26402530	TRUE	4.7154e-22	1.48e-23	0.629453	0.0977454	61	9	13	6
	chr14	50999328	50999477	TRUE	4.7154e-22	1.48e-23	0.944444	0.238154	43	27	2	1
	chr17	38020393	38020542	TRUE	4.77475e-22	1.5e-23	0.632716	0.0926798	60	27	4	2
	chr9	127533528	127533677	TRUE	4.80219e-22	1.51e-23	0.929487	0.264559	52	26	3	2
	chr22	51066559	51066708	TRUE	4.82957e-22	1.52e-23	0.84127	0.131722	35	21	2	1
	chr19	23456984	23457133	TRUE	4.91592e-22	1.55e-23	0.809649	0.149088	45	19	4	2
	chr19	39616320	39616469	TRUE	4.91592e-22	1.55e-23	0.793333	0.152254	51	20	4	2
	chr1	32573544	32573693	TRUE	4.97481e-22	1.57e-23	0.797619	0.134276	50	21	5	2
	chr7	74306801	74306950	TRUE	4.99286e-22	1.58e-23	0.886667	0.208492	42	15	5	2
	chr10	38383175	38383324	TRUE	4.99286e-22	1.58e-23	0.764444	0.152329	51	15	5	3
	chr19	50321446	50321595	TRUE	4.99286e-22	1.58e-23	0.803922	0.177924	53	17	3	3
	chr1	21671986	21672135	TRUE	5.0199e-22	1.59e-23	0.9125	0.215059	50	20	3	2
	chr16	67450329	67450478	TRUE	5.07843e-22	1.61e-23	0.854167	0.184649	50	28	3	1
	chr3	40498730	40498879	TRUE	5.19519e-22	1.65e-23	0.918333	0.181285	41	10	5	4
	chr7	120498129	120498278	TRUE	5.19519e-22	1.65e-23	0.832692	0.297381	80	26	7	3
	chr10	73975646	73975795	TRUE	5.31632e-22	1.69e-23	0.826923	0.149884	35	13	2	2
	chr7	137028498	137028647	TRUE	5.43723e-22	1.73e-23	0.660047	0.254057	110	22	10	5
	chr1	247242021	247242170	TRUE	5.51657e-22	1.76e-23	0.916667	0.15233	33	18	3	1
	chr2	85581607	85581756	TRUE	5.51657e-22	1.76e-23	0.916667	0.141446	34	14	2	2
	chr16	30621581	30621730	TRUE	5.51657e-22	1.76e-23	0.778736	0.16417	60	29	4	2
	chr3	158288807	158288956	TRUE	5.56922e-22	1.78e-23	0.894737	0.0900227	28	19	2	1
	chr6	109761799	109761948	TRUE	5.56922e-22	1.78e-23	1	0.133362	26	18	2	1
	chr1	150266169	150266318	TRUE	5.62674e-22	1.8e-23	0.753042	0.08931	49	12	7	4
	chr1	100598619	100598768	TRUE	5.99647e-22	1.92e-23	0.745833	0.15194	49	20	4	2
	chr17	58755072	58755221	TRUE	6.20951e-22	1.99e-23	0.880952	0.171909	44	14	4	3
	chr7	641173	641322	TRUE	6.54688e-22	2.1e-23	0.56746	0.113631	93	27	6	3
	chr7	155089443	155089592	TRUE	6.66561e-22	2.14e-23	0.890805	0.256773	63	29	3	2
	chr7	100183728	100183877	TRUE	6.75301e-22	2.17e-23	0.88	0.179853	45	15	5	3
	chr4	39063960	39064109	TRUE	7.08899e-22	2.28e-23	0.630952	0.15068	61	8	17	7
	chr22	41601213	41601362	TRUE	7.23798e-22	2.33e-23	0.685606	0.132279	46	22	3	2
	chr5	68389718	68389867	TRUE	7.3867e-22	2.38e-23	0.92029	0.191193	42	23	3	1
	chr11	61560037	61560186	TRUE	7.41113e-22	2.39e-23	0.738095	0.137781	45	21	4	2
	chr7	5862691	5862840	TRUE	7.43551e-22	2.4e-23	0.646154	0.119825	65	26	5	2
	chr22	26908403	26908552	TRUE	7.45985e-22	2.41e-23	0.758621	0.0990864	49	29	3	1
	chr2	170430376	170430525	TRUE	7.48415e-22	2.42e-23	0.787037	0.186108	69	18	7	3
	chr1	54665740	54665889	TRUE	7.50174e-22	2.43e-23	0.882353	0.126557	30	17	3	1
	chr2	217363420	217363569	TRUE	7.50174e-22	2.43e-23	0.744907	0.128821	62	18	7	3
	chr3	125239010	125239159	TRUE	7.86521e-22	2.55e-23	0.846667	0.219864	57	25	3	2
	chr6	28249264	28249413	TRUE	7.88906e-22	2.56e-23	0.8125	0.138048	45	24	2	1
	chr3	129407452	129407601	TRUE	7.93664e-22	2.58e-23	0.574638	0.133609	89	23	8	3
	chr17	45899099	45899248	TRUE	7.93664e-22	2.58e-23	0.947059	0.158958	38	17	3	2
	chr17	73663299	73663448	TRUE	7.9911e-22	2.6e-23	0.895833	0.13405	35	16	4	2
	chr2	37458692	37458841	TRUE	8.44466e-22	2.75e-23	0.941176	0.149117	30	17	1	1
	chr12	50616440	50616589	TRUE	8.68266e-22	2.83e-23	0.722498	0.17576	74	11	13	6
	chr8	104033191	104033340	TRUE	8.88959e-22	2.9e-23	0.816667	0.127502	38	30	2	1
	chr3	139062698	139062847	TRUE	9.1574e-22	2.99e-23	0.835	0.0968645	34	10	6	3
	chr7	157129647	157129796	TRUE	9.33295e-22	3.05e-23	1	0.156992	28	15	2	1
	chr12	51441984	51442133	TRUE	9.44704e-22	3.09e-23	0.820588	0.168226	53	17	6	3
	chr10	105156175	105156324	TRUE	9.46098e-22	3.1e-23	0.904762	0.127685	30	21	2	1
	chr14	31926632	31926781	TRUE	9.46098e-22	3.1e-23	0.836508	0.200605	60	21	5	2
	chr15	44119108	44119257	TRUE	9.66614e-22	3.17e-23	0.945614	0.208635	44	19	3	2
	chr9	98734115	98734264	TRUE	9.71861e-22	3.19e-23	0.409764	0.0683331	119	12	19	9
	chr8	28347736	28347885	TRUE	9.95362e-22	3.27e-23	0.757018	0.14354	51	19	5	2
	chr8	38853993	38854142	TRUE	9.96662e-22	3.28e-23	0.847222	0.168385	39	18	4	2
	chr10	100174893	100175042	TRUE	9.96662e-22	3.28e-23	0.673077	0.110712	57	26	3	2
	chr17	30677057	30677206	TRUE	1.01401e-21	3.34e-23	0.86131	0.151703	43	16	4	2
	chr7	97501806	97501955	TRUE	1.01527e-21	3.35e-23	0.701923	0.144313	79	26	5	3
	chr12	109915107	109915256	TRUE	1.01527e-21	3.35e-23	0.708333	0.126183	50	22	4	2
	chr13	107220466	107220615	TRUE	1.07192e-21	3.54e-23	0.779762	0.17069	57	28	3	2
	chr8	145597631	145597780	TRUE	1.08006e-21	3.57e-23	0.896552	0.160524	38	29	2	1
	chr17	73975201	73975350	TRUE	1.08517e-21	3.59e-23	0.904762	0.168836	39	21	3	1
	chr2	237994412	237994561	TRUE	1.09329e-21	3.62e-23	0.87	0.181347	51	20	5	2
	chr16	20911612	20911761	TRUE	1.14062e-21	3.78e-23	0.868421	0.127503	32	19	3	1
	chr1	20208788	20208937	TRUE	1.14265e-21	3.79e-23	0.869231	0.135836	37	13	2	2
	chr1	28969537	28969686	TRUE	1.16275e-21	3.86e-23	0.796296	0.165676	65	27	4	2
	chr4	152020654	152020803	TRUE	1.21892e-21	4.05e-23	0.892857	0.119042	31	14	4	2
	chr3	12598494	12598643	TRUE	1.21982e-21	4.06e-23	0.876344	0.182876	45	31	2	1
	chr15	64673654	64673803	TRUE	1.21982e-21	4.06e-23	0.867857	0.160263	40	14	5	2
	chr9	102668835	102668984	TRUE	1.23678e-21	4.12e-23	0.763889	0.152623	43	24	2	1
	chr17	9479844	9479993	TRUE	1.27471e-21	4.25e-23	0.720522	0.163343	73	21	6	3
	chr2	9695869	9696018	TRUE	1.30657e-21	4.36e-23	0.901515	0.119359	31	11	2	2
	chr1	28908335	28908484	TRUE	1.30844e-21	4.37e-23	0.816667	0.16036	44	20	4	2
	chr9	130890664	130890813	TRUE	1.3133e-21	4.39e-23	0.952381	0.170946	32	21	2	1
	chr17	77924608	77924757	TRUE	1.31815e-21	4.41e-23	0.654991	0.209811	93	26	7	3
	chr8	48920895	48921044	TRUE	1.35286e-21	4.53e-23	0.85	0.0808022	30	20	2	1
	chr3	183892534	183892683	TRUE	1.39645e-21	4.68e-23	0.870455	0.189958	58	22	4	2
	chr19	58038593	58038742	TRUE	1.42507e-21	4.78e-23	0.742361	0.126377	43	12	4	3
	chr17	40761347	40761496	TRUE	1.42683e-21	4.79e-23	0.907407	0.153016	39	18	3	2
	chr19	54605946	54606095	TRUE	1.44942e-21	4.87e-23	0.765476	0.158117	53	9	5	5
	chr7	23571608	23571757	TRUE	1.57902e-21	5.31e-23	0.92029	0.221261	50	23	4	2
	chr8	30515690	30515839	TRUE	1.60304e-21	5.4e-23	1	0.211453	33	23	2	1
	chr11	6255893	6256042	TRUE	1.60304e-21	5.4e-23	0.958333	0.0935537	26	16	2	1
	chr12	56390943	56391092	TRUE	1.62837e-21	5.49e-23	0.935185	0.164346	36	18	2	2
	chr19	2783306	2783455	TRUE	1.66551e-21	5.62e-23	0.87037	0.171059	39	18	4	2
	chr12	110434052	110434201	TRUE	1.68186e-21	5.68e-23	0.74	0.103473	38	25	2	1
	chr7	65338157	65338306	TRUE	1.71001e-21	5.78e-23	0.94	0.19468	37	25	3	1
	chr3	52570521	52570670	TRUE	1.73517e-21	5.87e-23	0.934783	0.246415	43	23	3	1
	chr7	23719649	23719798	TRUE	1.74255e-21	5.9e-23	0.483608	0.0957491	96	26	7	3
	chr1	31538516	31538665	TRUE	1.82075e-21	6.17e-23	0.958333	0.149457	32	24	2	1
	chr21	47878545	47878694	TRUE	1.85459e-21	6.29e-23	0.972222	0.172959	32	18	2	1
	chr17	37213172	37213321	TRUE	1.90605e-21	6.47e-23	0.75	0.119321	55	25	4	2
	chr15	81282157	81282306	TRUE	2.01923e-21	6.86e-23	0.761905	0.120643	42	21	3	2
	chr1	6761825	6761974	TRUE	2.02047e-21	6.87e-23	0.741935	0.106989	45	31	2	1
	chr1	151762916	151763065	TRUE	2.03639e-21	6.93e-23	0.724638	0.144934	49	23	4	2
	chr1	47779771	47779920	TRUE	2.04642e-21	6.97e-23	0.758772	0.172556	55	19	5	2
	chr15	63892960	63893109	TRUE	2.05469e-21	7.01e-23	0.768966	0.216464	66	29	3	2
	chr19	12721632	12721781	TRUE	2.05469e-21	7.01e-23	0.598039	0.0669604	50	17	4	2
	chr6	31830661	31830810	TRUE	2.08518e-21	7.12e-23	0.805263	0.150489	48	19	5	2
	chr9	96213758	96213907	TRUE	2.09805e-21	7.17e-23	0.743333	0.16371	59	25	4	2
	chr20	44993016	44993165	TRUE	2.11968e-21	7.25e-23	0.791667	0.164328	50	28	3	1
	chr7	127292102	127292251	TRUE	2.17048e-21	7.43e-23	0.688095	0.175679	75	22	5	3
	chr20	44044624	44044773	TRUE	2.27666e-21	7.8e-23	0.786458	0.0820142	38	16	4	2
	chr17	40761354	40761503	TRUE	2.32724e-21	7.98e-23	0.907407	0.155389	39	18	3	2
	chr4	82393013	82393162	TRUE	2.32821e-21	7.99e-23	0.973684	0.144881	29	19	2	1
	chr6	33256943	33257092	TRUE	2.33208e-21	8.01e-23	0.8125	0.170694	47	20	4	2
	chr8	141467806	141467955	TRUE	2.33304e-21	8.02e-23	0.864943	0.186213	45	29	3	1
	chr21	15399642	15399791	TRUE	2.33981e-21	8.05e-23	0.658333	0.131863	57	24	4	2
	chr15	44038490	44038639	TRUE	2.35528e-21	8.11e-23	0.97619	0.174386	32	14	2	2
	chr16	25042965	25043114	TRUE	2.35912e-21	8.13e-23	0.904762	0.104445	29	14	2	2
	chr6	105307746	105307895	TRUE	2.38905e-21	8.24e-23	0.904762	0.164615	38	21	3	1
	chr3	50126268	50126417	TRUE	2.43052e-21	8.39e-23	0.926471	0.113855	32	17	2	1
	chr19	35168467	35168616	TRUE	2.44007e-21	8.43e-23	0.987179	0.174608	32	13	4	2
	chr1	3566589	3566738	TRUE	2.46118e-21	8.51e-23	0.732143	0.102639	41	28	2	1
	chr22	30163258	30163407	TRUE	2.4678e-21	8.54e-23	0.761111	0.139008	48	15	6	3
	chr7	100895553	100895702	TRUE	2.47153e-21	8.56e-23	0.657576	0.139682	68	22	6	3
	chr1	155715496	155715645	TRUE	2.53583e-21	8.79e-23	0.929825	0.12253	33	19	2	1
	chr4	57253590	57253739	TRUE	2.64615e-21	9.18e-23	0.805556	0.220667	54	30	3	1
	chr11	17099172	17099321	TRUE	2.66988e-21	9.27e-23	0.718421	0.121198	47	19	3	2
	chr19	10828655	10828804	TRUE	2.6907e-21	9.35e-23	0.863095	0.20804	50	28	3	1
	chr8	8860214	8860363	TRUE	2.69135e-21	9.36e-23	0.747222	0.0972411	48	18	4	2
	chr19	21688337	21688486	TRUE	2.75233e-21	9.58e-23	0.657143	0.171471	74	21	6	3
	chr7	44887677	44887826	TRUE	2.7759e-21	9.67e-23	0.899383	0.234437	56	27	4	2
	chr9	124922050	124922199	TRUE	2.80516e-21	9.78e-23	0.463316	0.133351	91	27	6	3
	chr5	64859031	64859180	TRUE	2.82004e-21	9.84e-23	0.90625	0.114055	30	16	3	1
	chr13	49684349	49684498	TRUE	2.86354e-21	1e-22	0.688797	0.105712	60	13	9	4
	chr15	74753481	74753630	TRUE	2.8898e-21	1.01e-22	0.877451	0.141389	41	17	4	2
	chr17	73127829	73127978	TRUE	2.9446e-21	1.03e-22	0.820988	0.199904	53	27	3	1
	chr2	198569987	198570136	TRUE	2.97075e-21	1.04e-22	0.717949	0.130321	50	26	3	1
	chr16	70380724	70380873	TRUE	3.05393e-21	1.07e-22	0.785714	0.115163	41	14	4	2
	chr1	151254357	151254506	TRUE	3.07995e-21	1.08e-22	0.740385	0.141632	50	26	3	1
	chr12	77157754	77157903	TRUE	3.2199e-21	1.13e-22	0.712121	0.117685	48	22	4	2
	chr5	70751342	70751491	TRUE	3.27421e-21	1.15e-22	0.71746	0.135261	49	12	6	4
	chr2	219081774	219081923	TRUE	3.32843e-21	1.17e-22	0.78	0.141258	39	25	3	1
	chr1	222885816	222885965	TRUE	3.35413e-21	1.18e-22	0.865385	0.172708	43	26	2	1
	chr16	3450963	3451112	TRUE	3.37704e-21	1.19e-22	0.81	0.135717	42	25	3	1
	chr16	3450977	3451126	TRUE	3.37704e-21	1.19e-22	0.81	0.135717	42	25	3	1
	chr2	112641693	112641842	TRUE	3.40264e-21	1.2e-22	0.815789	0.140941	37	19	3	1
	chr2	53994829	53994978	TRUE	3.65486e-21	1.29e-22	0.766667	0.113381	44	15	6	2
	chr2	152118329	152118478	TRUE	3.67422e-21	1.3e-22	0.8	0.167748	52	17	5	3
	chr9	111696361	111696510	TRUE	3.67422e-21	1.3e-22	0.666667	0.219361	68	26	5	2
	chr19	15443294	15443443	TRUE	3.67422e-21	1.3e-22	0.97619	0.157372	30	21	3	1
	chr3	141456951	141457100	TRUE	3.69947e-21	1.31e-22	0.627976	0.145924	54	28	3	1
	chr19	13068002	13068151	TRUE	3.72469e-21	1.32e-22	0.760119	0.197133	77	28	5	2
	chr1	161087791	161087940	TRUE	3.83445e-21	1.36e-22	0.907407	0.151244	34	27	2	1
	chr1	33116724	33116873	TRUE	3.91586e-21	1.39e-22	0.953333	0.224637	45	25	3	1
	chr9	26956271	26956420	TRUE	3.96899e-21	1.41e-22	0.878125	0.166248	40	16	5	2
	chr2	25264873	25265022	TRUE	4.02203e-21	1.43e-22	0.888889	0.141801	35	27	1	1
	chr7	73097798	73097947	TRUE	4.07499e-21	1.45e-22	0.788333	0.14633	54	20	5	2
	chr1	28832396	28832545	TRUE	4.15595e-21	1.48e-22	0.714912	0.127359	51	19	5	2
	chr9	37485845	37485994	TRUE	4.26483e-21	1.52e-22	0.788194	0.201516	55	24	4	2
	chr1	203738666	203738815	TRUE	4.28942e-21	1.53e-22	0.673413	0.135647	70	21	5	3
	chr9	140082954	140083103	TRUE	4.342e-21	1.55e-22	0.892857	0.116013	30	14	4	2
	chr19	52408199	52408348	TRUE	4.39448e-21	1.57e-22	0.728788	0.136433	59	22	5	2
	chr19	47987439	47987588	TRUE	4.50282e-21	1.61e-22	0.728571	0.181536	52	21	5	2
	chr3	48936354	48936503	TRUE	4.52715e-21	1.62e-22	0.884921	0.181215	48	21	3	2
	chr16	72698968	72699117	TRUE	4.771e-21	1.71e-22	0.839223	0.226541	65	19	5	3
	chr17	41476253	41476402	TRUE	4.771e-21	1.71e-22	0.601852	0.145458	75	27	6	2
	chr7	1199750	1199899	TRUE	4.79505e-21	1.72e-22	0.583333	0.0959773	49	20	4	2
	chr16	71928223	71928372	TRUE	4.81907e-21	1.73e-22	0.670107	0.143376	73	19	7	3
	chr10	99496780	99496929	TRUE	4.84305e-21	1.74e-22	0.604464	0.134614	57	16	3	3
	chr12	72079778	72079927	TRUE	4.86699e-21	1.75e-22	0.786458	0.104848	52	32	2	1
	chr2	219524307	219524456	TRUE	4.91868e-21	1.77e-22	0.776316	0.0870433	46	19	4	2
	chr6	26365298	26365447	TRUE	4.94252e-21	1.78e-22	0.828798	0.129935	41	7	12	5
	chr14	39644287	39644436	TRUE	4.96632e-21	1.79e-22	0.735088	0.174691	49	19	4	2
	chr10	18940502	18940651	TRUE	5.10098e-21	1.84e-22	0.852564	0.117167	32	13	4	2
	chr1	10532565	10532714	TRUE	5.12462e-21	1.85e-22	0.907407	0.151591	36	18	4	2
	chr16	75600149	75600298	TRUE	5.20358e-21	1.88e-22	0.854167	0.100179	30	16	2	1
	chr11	43902297	43902446	TRUE	5.2271e-21	1.89e-22	1	0.124407	24	18	2	1
	chr4	152682098	152682247	TRUE	5.25058e-21	1.9e-22	0.703704	0.0811387	39	18	3	2
	chr11	18127590	18127739	TRUE	5.27403e-21	1.91e-22	0.814815	0.111562	35	27	2	1
	chr6	35995473	35995622	TRUE	5.29743e-21	1.92e-22	0.811404	0.14064	46	19	4	2
	chr10	99496782	99496931	TRUE	5.34837e-21	1.94e-22	0.604464	0.135001	57	16	3	3
	chr12	67662961	67663110	TRUE	5.39923e-21	1.96e-22	0.884524	0.198357	46	14	4	3
	chr9	115913138	115913287	TRUE	5.42249e-21	1.97e-22	0.962963	0.0895536	25	18	3	1
	chr7	63774292	63774441	TRUE	5.47321e-21	1.99e-22	0.8	0.158754	54	16	6	3
	chr17	73851453	73851602	TRUE	5.52385e-21	2.01e-22	0.877778	0.134772	34	15	4	2
	chr8	90914662	90914811	TRUE	5.60187e-21	2.04e-22	0.931818	0.146162	31	22	1	1
	chr5	138609692	138609841	TRUE	5.65233e-21	2.06e-22	0.815972	0.196335	56	24	4	2
	chr6	32821838	32821987	TRUE	5.73012e-21	2.09e-22	0.89881	0.186166	40	28	2	1
	chr7	105517164	105517313	TRUE	5.75301e-21	2.1e-22	0.806111	0.163432	60	30	3	2
	chr20	37209738	37209887	TRUE	5.80323e-21	2.12e-22	0.616092	0.183666	91	29	5	3
	chr14	62162139	62162288	TRUE	6.09954e-21	2.23e-22	0.962121	0.165512	33	22	3	1
	chr17	36003439	36003588	TRUE	6.12208e-21	2.24e-22	0.74814	0.166794	64	16	6	4
	chr17	73150727	73150876	TRUE	6.1992e-21	2.27e-22	0.9	0.236275	51	18	5	2
	chr2	174219461	174219610	TRUE	6.33078e-21	2.32e-22	0.782609	0.110855	40	23	2	1
	chr7	6048689	6048838	TRUE	6.40762e-21	2.35e-22	0.844444	0.127414	35	15	4	2
	chr8	42249290	42249439	TRUE	6.48434e-21	2.38e-22	0.802083	0.144067	37	16	2	2
	chr7	83824169	83824318	TRUE	6.50649e-21	2.39e-22	0.364932	0.145632	140	20	13	7
	chr9	139010683	139010832	TRUE	6.71377e-21	2.47e-22	0.778667	0.23421	66	25	5	2
	chr12	49961863	49962012	TRUE	6.71377e-21	2.47e-22	0.679365	0.159195	66	21	6	3
	chr2	216176592	216176741	TRUE	6.76285e-21	2.49e-22	0.781746	0.123825	40	21	2	1
	chr16	67515041	67515190	TRUE	7.11038e-21	2.62e-22	0.772727	0.120819	36	22	3	1
	chr20	45035223	45035372	TRUE	7.15907e-21	2.64e-22	0.931818	0.166425	33	22	3	1
	chr19	13885157	13885306	TRUE	7.26188e-21	2.68e-22	0.845833	0.146634	43	20	4	2
	chr5	82373217	82373366	TRUE	7.28331e-21	2.69e-22	0.830556	0.144792	35	12	3	2
	chr20	25604566	25604715	TRUE	7.38586e-21	2.73e-22	0.73913	0.138016	40	23	3	1
	chr8	67579404	67579553	TRUE	7.43419e-21	2.75e-22	0.908333	0.170699	38	20	4	1
	chr4	186733344	186733493	TRUE	7.44964e-21	2.76e-22	0.659156	0.271172	127	27	9	4
	chr19	48018449	48018598	TRUE	7.44964e-21	2.76e-22	0.730037	0.116155	44	13	5	3
	chr19	56988695	56988844	TRUE	7.60569e-21	2.82e-22	0.894737	0.177831	41	19	4	2
	chr17	6735012	6735161	TRUE	7.68065e-21	2.85e-22	0.833333	0.127701	33	20	3	1
	chr2	7073088	7073237	TRUE	7.79728e-21	2.9e-22	0.661667	0.125966	60	20	5	3
	chr10	69425368	69425517	TRUE	7.79728e-21	2.9e-22	0.586797	0.132863	96	22	8	4
	chr16	12070502	12070651	TRUE	7.79728e-21	2.9e-22	0.740196	0.164727	60	34	3	1
	chr1	154155677	154155826	TRUE	7.95246e-21	2.96e-22	0.90625	0.167044	33	16	3	2
	chr5	125931034	125931183	TRUE	8.0537e-21	3e-22	0.774306	0.191204	51	24	4	2
	chr3	142720281	142720430	TRUE	8.12797e-21	3.03e-22	0.875	0.147169	43	20	4	2
	chr7	135347147	135347296	TRUE	8.14851e-21	3.04e-22	0.728431	0.132328	48	17	4	2
	chr17	26646021	26646170	TRUE	8.22259e-21	3.07e-22	0.909091	0.167237	33	22	2	1
	chr3	49449539	49449688	TRUE	8.29655e-21	3.1e-22	0.965385	0.204394	37	13	4	2
	chr9	88555957	88556106	TRUE	8.42389e-21	3.15e-22	0.875	0.208411	47	24	4	1
	chr2	210867252	210867401	TRUE	8.51777e-21	3.19e-22	0.840909	0.102273	30	22	2	1
	chr9	7799751	7799900	TRUE	8.51777e-21	3.19e-22	0.925	0.110253	27	20	2	1
	chr12	27175383	27175532	TRUE	8.53791e-21	3.2e-22	0.81746	0.138705	40	21	3	1
	chr1	161337616	161337765	TRUE	8.81788e-21	3.31e-22	0.55881	0.100916	99	20	9	4
	chr13	46626883	46627032	TRUE	8.81788e-21	3.31e-22	0.726471	0.17933	55	17	6	3
	chr1	100715361	100715510	TRUE	8.86437e-21	3.33e-22	0.865385	0.128495	31	13	4	2
	chr18	2571441	2571590	TRUE	9.15019e-21	3.44e-22	0.87037	0.155927	34	18	3	1
	chr4	109541622	109541771	TRUE	9.51531e-21	3.58e-22	0.581129	0.0893331	49	9	8	5
	chr8	48173442	48173591	TRUE	9.69395e-21	3.65e-22	0.956522	0.163116	30	23	2	1
	chr17	80408646	80408795	TRUE	9.73964e-21	3.67e-22	0.713043	0.149977	54	23	4	2
	chr17	33307438	33307587	TRUE	9.75873e-21	3.68e-22	0.719231	0.111453	48	13	5	3
	chr2	179343274	179343423	TRUE	9.85729e-21	3.72e-22	0.916667	0.12901	31	22	2	1
	chr1	33896567	33896716	TRUE	1.04323e-20	3.94e-22	0.804598	0.168089	55	29	3	1
	chr3	157827792	157827941	TRUE	1.04958e-20	3.97e-22	0.743056	0.218652	67	24	5	2
	chr3	157827795	157827944	TRUE	1.04958e-20	3.97e-22	0.743056	0.218652	67	24	5	2
	chr2	172750685	172750834	TRUE	1.05935e-20	4.01e-22	0.685185	0.153517	63	27	4	2
	chr1	201798188	201798337	TRUE	1.06646e-20	4.04e-22	0.95098	0.120874	28	17	2	1
	chr20	13765484	13765633	TRUE	1.06829e-20	4.05e-22	0.811111	0.114578	35	15	4	2
	chr17	33390711	33390860	TRUE	1.0912e-20	4.14e-22	0.666667	0.149652	45	16	4	2
	chr2	44588582	44588731	TRUE	1.09565e-20	4.16e-22	0.796296	0.143838	46	27	3	1
	chr8	109455753	109455902	TRUE	1.10798e-20	4.21e-22	0.826923	0.112038	31	13	4	2
	chr11	82904633	82904782	TRUE	1.13081e-20	4.3e-22	0.822222	0.0934088	34	15	4	2
	chr10	102046391	102046540	TRUE	1.13521e-20	4.32e-22	0.645679	0.130689	79	27	5	2
	chr1	94344694	94344843	TRUE	1.16148e-20	4.43e-22	0.934524	0.102536	28	14	3	2
	chr11	1411029	1411178	TRUE	1.16148e-20	4.43e-22	0.79798	0.20744	65	33	2	1
	chr20	43595020	43595169	TRUE	1.16148e-20	4.43e-22	0.941176	0.0932009	23	17	2	1
	chr18	53256986	53257135	TRUE	1.16847e-20	4.46e-22	0.797368	0.238417	62	19	6	3
	chr2	131113518	131113667	TRUE	1.2278e-20	4.69e-22	0.925926	0.169569	33	27	2	1
	chr11	86013188	86013337	TRUE	1.25565e-20	4.8e-22	0.778431	0.123014	43	17	5	2
	chr7	43965947	43966096	TRUE	1.25638e-20	4.81e-22	0.710753	0.139096	62	31	3	2
	chr7	43965948	43966097	TRUE	1.25638e-20	4.81e-22	0.710753	0.139096	62	31	3	2
	chr6	32806499	32806648	TRUE	1.26327e-20	4.84e-22	0.752976	0.148482	57	28	4	2
	chr2	47572197	47572346	TRUE	1.27797e-20	4.9e-22	0.735417	0.150386	45	16	5	2
	chr19	58740241	58740390	TRUE	1.29265e-20	4.96e-22	0.875	0.184844	37	20	3	1
	chr6	30875877	30876026	TRUE	1.33074e-20	5.11e-22	0.791667	0.164373	39	12	6	3
	chr8	95487262	95487411	TRUE	1.33235e-20	5.12e-22	0.907407	0.21596	43	18	4	2
	chr1	156561458	156561607	TRUE	1.39376e-20	5.36e-22	0.928571	0.112591	27	21	2	1
	chr7	35755984	35756133	TRUE	1.40311e-20	5.4e-22	0.334197	0.102697	237	16	29	14
	chr4	134070220	134070369	TRUE	1.42543e-20	5.49e-22	0.897727	0.256028	48	22	4	2
	chr3	100120177	100120326	TRUE	1.44146e-20	5.56e-22	0.54881	0.165215	83	25	6	3
	chr17	46908272	46908421	TRUE	1.44146e-20	5.56e-22	0.791667	0.104892	42	20	3	2
	chr5	133984379	133984528	TRUE	1.44556e-20	5.58e-22	0.672414	0.170826	57	29	3	1
	chr12	100536594	100536743	TRUE	1.44967e-20	5.6e-22	0.941176	0.140128	32	17	1	1
	chr12	58176436	58176585	TRUE	1.45894e-20	5.64e-22	0.833333	0.113279	31	18	2	1
	chr19	37096116	37096265	TRUE	1.46561e-20	5.67e-22	0.84375	0.0944015	34	16	3	2
	chr15	40453110	40453259	TRUE	1.47485e-20	5.71e-22	0.833333	0.119601	39	15	5	2
	chr2	103353265	103353414	TRUE	1.49957e-20	5.81e-22	0.912698	0.131117	31	21	2	1
	chr4	138453600	138453749	TRUE	1.50103e-20	5.82e-22	0.783333	0.194588	55	20	5	2
	chr12	16035188	16035337	TRUE	1.55147e-20	6.02e-22	0.852564	0.16489	43	13	5	3
	chr19	9945899	9946048	TRUE	1.56834e-20	6.09e-22	0.848485	0.173557	40	22	3	1
	chr21	34915088	34915237	TRUE	1.64696e-20	6.4e-22	0.835606	0.216703	52	22	4	2
	chr16	71496081	71496230	TRUE	1.65603e-20	6.44e-22	0.637931	0.124739	67	29	4	2
	chr9	40792064	40792213	TRUE	1.66251e-20	6.47e-22	0.775439	0.0928417	37	19	3	1
	chr11	108093459	108093608	TRUE	1.67156e-20	6.51e-22	0.985714	0.176555	31	14	3	2
	chr11	62414056	62414205	TRUE	1.70111e-20	6.63e-22	0.795455	0.143042	42	22	3	1
	chr2	202507362	202507511	TRUE	1.70755e-20	6.66e-22	0.840278	0.132893	37	24	2	1
	chr5	121465115	121465264	TRUE	1.72679e-20	6.74e-22	0.51127	0.0932824	68	15	9	4
	chr17	78518525	78518674	TRUE	1.7972e-20	7.02e-22	0.462963	0.111806	57	18	6	3
	chr20	46130557	46130706	TRUE	1.83425e-20	7.17e-22	0.755952	0.181555	51	28	3	1
	chr12	75784789	75784938	TRUE	1.83546e-20	7.18e-22	0.705208	0.0973792	50	16	3	3
	chr20	30865367	30865516	TRUE	1.8801e-20	7.36e-22	0.76087	0.122618	41	23	3	1
	chr19	57831777	57831926	TRUE	1.89659e-20	7.43e-22	0.885417	0.140915	34	16	3	2
	chr12	27863629	27863778	TRUE	1.9258e-20	7.55e-22	0.892231	0.161789	50	19	4	2
	chr19	8070481	8070630	TRUE	1.98302e-20	7.78e-22	0.965517	0.228034	39	29	2	1
	chr6	106773647	106773796	TRUE	1.99685e-20	7.84e-22	0.785714	0.158969	44	21	4	2
	chr11	64085469	64085618	TRUE	2.02593e-20	7.96e-22	1	0.20863	31	22	2	1
	chr1	246887278	246887427	TRUE	2.05497e-20	8.08e-22	0.638889	0.0998823	65	27	3	2
	chr1	198906510	198906659	TRUE	2.06617e-20	8.13e-22	0.697143	0.233694	94	20	9	4
	chr2	97405753	97405902	TRUE	2.07736e-20	8.18e-22	0.78125	0.150715	41	16	5	2
	chr7	99717165	99717314	TRUE	2.086e-20	8.22e-22	0.72803	0.177617	77	22	7	3
	chr10	127408014	127408163	TRUE	2.10984e-20	8.32e-22	0.894737	0.150205	39	19	4	2
	chr2	223725632	223725781	TRUE	2.12857e-20	8.4e-22	1	0.176726	28	20	2	1
	chr2	122513021	122513170	TRUE	2.25869e-20	8.92e-22	0.738095	0.111656	36	21	3	1
	chr10	75541708	75541857	TRUE	2.28489e-20	9.03e-22	0.628205	0.134593	56	26	4	2
	chr9	131084691	131084840	TRUE	2.3161e-20	9.16e-22	0.785714	0.109796	34	14	4	2
	chr16	67918681	67918830	TRUE	2.34221e-20	9.27e-22	0.790476	0.236773	59	35	3	1
	chr13	50975262	50975411	TRUE	2.36323e-20	9.36e-22	0.833929	0.154457	47	14	6	3
	chr4	155547997	155548146	TRUE	2.49271e-20	9.88e-22	0.833333	0.11417	38	23	2	1
	chr5	156569873	156570022	TRUE	2.54637e-20	1.01e-21	0.762755	0.165598	54	14	8	3
	chr4	155471475	155471624	TRUE	2.66856e-20	1.06e-21	0.970588	0.138274	27	17	3	1
	chr12	120632465	120632614	TRUE	2.66856e-20	1.06e-21	0.903846	0.143293	32	26	2	1
	chr5	6378591	6378740	TRUE	2.69179e-20	1.07e-21	0.888889	0.118588	35	24	2	1
	chr5	151031740	151031889	TRUE	2.71302e-20	1.08e-21	0.54375	0.0984006	73	24	6	3
	chr19	54618988	54619137	TRUE	2.71302e-20	1.08e-21	0.872549	0.184813	41	17	4	2
	chr13	93878995	93879144	TRUE	2.73419e-20	1.09e-21	0.635873	0.147802	63	15	8	4
	chr19	15890749	15890898	TRUE	2.73419e-20	1.09e-21	0.936667	0.14343	32	15	3	2
	chr9	7799730	7799879	TRUE	2.80742e-20	1.12e-21	0.875	0.106487	28	20	2	1
	chr2	99797478	99797627	TRUE	2.82841e-20	1.13e-21	0.711905	0.130028	40	14	5	2
	chr20	9495171	9495320	TRUE	2.82841e-20	1.13e-21	0.516667	0.0770582	67	30	4	2
	chr4	8442404	8442553	TRUE	2.85139e-20	1.14e-21	0.875	0.13448	35	16	2	2
	chr22	26908389	26908538	TRUE	2.92433e-20	1.17e-21	0.75	0.0989256	50	27	3	1
	chr17	57297734	57297883	TRUE	2.97218e-20	1.19e-21	0.646552	0.129579	66	29	4	2
	chr19	1095343	1095492	TRUE	3.01997e-20	1.21e-21	0.797222	0.156917	49	24	4	2
	chr6	32095982	32096131	TRUE	3.04274e-20	1.22e-21	1	0.145679	25	10	4	2
	chr22	29663866	29664015	TRUE	3.11533e-20	1.25e-21	0.984375	0.200599	33	16	4	2
	chr1	54665764	54665913	TRUE	3.26019e-20	1.31e-21	0.933333	0.128958	26	15	3	1
	chr2	162016839	162016988	TRUE	3.26019e-20	1.31e-21	0.727273	0.155145	54	22	4	2
	chr3	51533953	51534102	TRUE	3.3076e-20	1.33e-21	0.87	0.176884	48	15	5	3
	chr1	161087803	161087952	TRUE	3.40465e-20	1.37e-21	0.903846	0.153888	33	26	2	1
	chr1	145507538	145507687	TRUE	3.4246e-20	1.38e-21	0.715556	0.14701	51	15	7	3
	chr9	88969330	88969479	TRUE	3.4246e-20	1.38e-21	0.936458	0.234329	47	16	5	2
	chr12	6677432	6677581	TRUE	3.44451e-20	1.39e-21	0.88	0.136195	37	25	2	1
	chr16	56459396	56459545	TRUE	3.44451e-20	1.39e-21	0.911111	0.172468	35	15	2	2
	chr7	92157797	92157946	TRUE	3.51634e-20	1.42e-21	0.788406	0.185929	55	23	4	2
	chr3	16306614	16306763	TRUE	3.60769e-20	1.46e-21	0.833333	0.177309	42	22	3	1
	chr15	50716479	50716628	TRUE	3.60769e-20	1.46e-21	0.958333	0.136909	29	16	2	1
	chr19	1021093	1021242	TRUE	3.60769e-20	1.46e-21	1	0.135487	24	18	2	1
	chr7	56032196	56032345	TRUE	3.7039e-20	1.5e-21	0.719048	0.1837	62	35	3	1
	chr2	103353294	103353443	TRUE	3.84933e-20	1.56e-21	0.854167	0.131425	40	24	2	1
	chr3	142720272	142720421	TRUE	3.86578e-20	1.57e-21	0.868421	0.146864	42	19	4	2
	chr5	68530522	68530671	TRUE	3.86578e-20	1.57e-21	0.916667	0.135955	35	9	3	3
	chr17	74734028	74734177	TRUE	3.86578e-20	1.57e-21	1	0.352981	46	18	2	2
	chr5	76326214	76326363	TRUE	3.88765e-20	1.58e-21	0.80303	0.14287	52	22	4	2
	chr6	2765566	2765715	TRUE	3.90949e-20	1.59e-21	0.939394	0.258004	50	22	2	2
	chr22	36635641	36635790	TRUE	3.9313e-20	1.6e-21	0.510556	0.148212	97	30	6	3
	chr19	36505093	36505242	TRUE	3.95308e-20	1.61e-21	0.95	0.157091	31	15	4	2
	chr7	26904293	26904442	TRUE	4.0239e-20	1.64e-21	0.693841	0.242903	101	23	8	4
	chr19	9879362	9879511	TRUE	4.11914e-20	1.68e-21	0.751852	0.139122	48	27	3	1
	chr10	75118464	75118613	TRUE	4.26325e-20	1.74e-21	0.717619	0.127249	56	15	6	3
	chr4	95128659	95128808	TRUE	4.30921e-20	1.76e-21	0.761905	0.126136	41	11	6	3
	chr9	130186553	130186702	TRUE	4.33065e-20	1.77e-21	0.826342	0.203288	85	21	7	4
	chr17	72869108	72869257	TRUE	4.37651e-20	1.79e-21	0.901515	0.108513	28	11	4	2
	chr11	36310951	36311100	TRUE	4.4223e-20	1.81e-21	0.816667	0.0939175	30	20	2	1
	chr8	22526613	22526762	TRUE	4.44361e-20	1.82e-21	0.857143	0.118299	27	14	2	1
	chr9	138392383	138392532	TRUE	4.46489e-20	1.83e-21	0.886905	0.223331	43	14	3	3
	chr19	49403469	49403618	TRUE	4.55929e-20	1.87e-21	0.760417	0.185737	47	16	5	2
	chr17	8279981	8280130	TRUE	4.65355e-20	1.91e-21	0.711806	0.173891	53	24	4	2
	chr17	42767117	42767266	TRUE	4.67464e-20	1.92e-21	0.649306	0.122521	52	24	3	2
	chr12	108154866	108155015	TRUE	4.6957e-20	1.93e-21	0.857143	0.118196	29	21	2	1
	chr15	63413932	63414081	TRUE	4.74105e-20	1.95e-21	0.844444	0.0757825	31	15	2	2
	chr12	110337979	110338128	TRUE	4.78633e-20	1.97e-21	0.815789	0.104154	38	19	2	2
	chr9	37465348	37465497	TRUE	4.8767e-20	2.01e-21	0.839683	0.178877	48	21	4	2
	chr10	105992072	105992221	TRUE	4.8767e-20	2.01e-21	0.809524	0.0912331	33	21	2	1
	chr12	123319195	123319344	TRUE	4.89755e-20	2.02e-21	0.645679	0.115127	63	27	5	2
	chr3	121613187	121613336	TRUE	4.93572e-20	2.04e-21	0.395378	0.0897557	54	17	5	3
	chr5	65017985	65018134	TRUE	4.93572e-20	2.04e-21	1	0.193423	29	22	1	1
	chr16	20753151	20753300	TRUE	4.93572e-20	2.04e-21	0.769231	0.193639	48	26	4	1
	chr1	165600350	165600499	TRUE	4.98065e-20	2.06e-21	0.746528	0.121684	47	24	3	1
	chr10	126432882	126433031	TRUE	5.00135e-20	2.07e-21	0.982759	0.252166	38	29	2	1
	chr1	82265982	82266131	TRUE	5.1186e-20	2.12e-21	0.923077	0.158607	31	13	3	2
	chr16	23464455	23464604	TRUE	5.21156e-20	2.16e-21	0.867647	0.146923	32	17	3	1
	chr14	78227449	78227598	TRUE	5.30072e-20	2.2e-21	0.800926	0.15404	50	18	5	2
	chr15	70994572	70994721	TRUE	5.30072e-20	2.2e-21	0.474074	0.109877	111	18	12	6
	chr7	130598021	130598170	TRUE	5.34521e-20	2.22e-21	0.440165	0.142892	179	24	15	7
	chr18	3594012	3594161	TRUE	5.36557e-20	2.23e-21	0.675595	0.179776	98	28	7	3
	chr10	22605199	22605348	TRUE	5.40622e-20	2.25e-21	0.901961	0.16342	38	17	3	2
	chr12	104359517	104359666	TRUE	5.40622e-20	2.25e-21	0.96875	0.121283	25	16	2	1
	chr3	37034879	37035028	TRUE	5.41902e-20	2.26e-21	0.850694	0.252952	63	24	4	2
	chr8	11141900	11142049	TRUE	5.41902e-20	2.26e-21	0.763889	0.12648	46	24	3	1
	chr16	5121750	5121899	TRUE	5.41902e-20	2.26e-21	0.735294	0.121881	42	34	2	1
	chr2	101179318	101179467	TRUE	5.55905e-20	2.32e-21	0.804598	0.201839	59	29	4	2
	chr5	36301956	36302105	TRUE	5.57917e-20	2.33e-21	0.52995	0.100923	91	19	9	4
	chr11	93394716	93394865	TRUE	5.59926e-20	2.34e-21	0.928571	0.0998269	25	14	2	1
	chr19	52074431	52074580	TRUE	5.61933e-20	2.35e-21	0.732222	0.101392	47	15	6	3
	chr6	26458089	26458238	TRUE	5.73495e-20	2.4e-21	0.916667	0.138055	31	10	5	3
	chr1	19577975	19578124	TRUE	5.7748e-20	2.42e-21	0.731111	0.131396	50	15	4	3
	chr22	38240255	38240404	TRUE	5.7748e-20	2.42e-21	0.755303	0.165794	57	22	4	2
	chr5	113697916	113698065	TRUE	5.81854e-20	2.44e-21	0.849123	0.201969	49	19	2	2
	chr3	186857215	186857364	TRUE	5.83838e-20	2.45e-21	0.714286	0.119969	40	21	3	1
	chr1	146644081	146644230	TRUE	5.90583e-20	2.48e-21	0.952381	0.163929	29	21	2	1
	chr4	100009911	100010060	TRUE	5.99698e-20	2.52e-21	0.686869	0.164491	72	33	4	2
	chr9	130548205	130548354	TRUE	6.01666e-20	2.53e-21	0.98	0.224928	35	25	2	1
	chr16	23652707	23652856	TRUE	6.13138e-20	2.58e-21	0.90625	0.119973	27	16	3	1
	chr12	48099726	48099875	TRUE	6.15094e-20	2.59e-21	0.791667	0.135302	42	20	3	2
	chr3	183735679	183735828	TRUE	6.24168e-20	2.63e-21	0.826667	0.156197	41	25	2	1
	chr7	104624325	104624474	TRUE	6.30857e-20	2.66e-21	0.696759	0.15813	54	18	5	3
	chr4	39699564	39699713	TRUE	6.32797e-20	2.67e-21	0.686667	0.163182	53	25	2	2
	chr11	62476960	62477109	TRUE	6.34735e-20	2.68e-21	0.891228	0.235333	49	19	4	2
	chr12	38710469	38710618	TRUE	6.39037e-20	2.7e-21	0.846429	0.164286	42	14	5	3
	chr16	56485324	56485473	TRUE	6.57524e-20	2.78e-21	0.846032	0.195061	52	21	5	2
	chr10	75504032	75504181	TRUE	6.61804e-20	2.8e-21	0.921875	0.180656	42	16	5	2
	chr3	131221781	131221930	TRUE	6.69893e-20	2.84e-21	0.894872	0.129444	32	13	3	2
	chr10	89623095	89623244	TRUE	6.69893e-20	2.84e-21	0.869048	0.250635	58	28	4	2
	chr14	90863273	90863422	TRUE	6.69893e-20	2.84e-21	0.956522	0.175158	30	23	2	1
	chr3	45883573	45883722	TRUE	6.76511e-20	2.87e-21	0.861111	0.129492	32	15	4	2
	chr17	40761594	40761743	TRUE	6.96782e-20	2.96e-21	0.875	0.218876	49	24	4	2
	chr21	35287980	35288129	TRUE	6.96782e-20	2.96e-21	0.716667	0.150186	51	17	5	3
	chr2	211341434	211341583	TRUE	7.03368e-20	2.99e-21	0.791667	0.136684	49	16	5	3
	chr3	48647050	48647199	TRUE	7.07594e-20	3.01e-21	0.833333	0.131383	36	16	3	2
	chr12	56727777	56727926	TRUE	7.16513e-20	3.05e-21	0.664706	0.119027	48	17	5	2
	chr17	61678143	61678292	TRUE	7.18377e-20	3.06e-21	0.665686	0.120575	53	17	6	3
	chr6	111195887	111196036	TRUE	7.5543e-20	3.22e-21	0.75641	0.222811	68	26	5	2
	chr2	198364592	198364741	TRUE	7.68988e-20	3.28e-21	0.710526	0.149225	40	19	3	2
	chr15	40857204	40857353	TRUE	7.73156e-20	3.3e-21	0.881944	0.139452	35	12	5	2
	chr7	72971533	72971682	TRUE	8.03072e-20	3.43e-21	0.94	0.200293	35	25	2	1
	chr20	36322334	36322483	TRUE	8.07212e-20	3.45e-21	0.62957	0.160057	61	31	3	1
	chr7	99097829	99097978	TRUE	8.09008e-20	3.46e-21	0.815625	0.13514	47	16	5	2
	chr7	148936674	148936823	TRUE	8.10801e-20	3.47e-21	0.75	0.116251	41	22	3	1
	chr11	117014940	117015089	TRUE	8.45282e-20	3.62e-21	0.894737	0.175657	37	19	3	1
	chr4	467950	468099	TRUE	8.51716e-20	3.65e-21	0.836996	0.165769	42	13	5	3
	chr15	76629047	76629196	TRUE	8.8146e-20	3.78e-21	0.754762	0.251796	87	28	6	3
	chr5	87969109	87969258	TRUE	9.03567e-20	3.88e-21	0.82381	0.166534	62	21	5	2
	chr11	65101246	65101395	TRUE	9.03567e-20	3.88e-21	0.928571	0.191439	34	21	3	1
	chr1	22379020	22379169	TRUE	9.07617e-20	3.9e-21	0.744792	0.143217	41	16	3	2
	chr11	64863583	64863732	TRUE	9.30267e-20	4e-21	0.842593	0.132676	36	18	3	2
	chr7	6414026	6414175	TRUE	9.55211e-20	4.11e-21	0.842593	0.183608	40	18	4	2
	chr2	68290082	68290231	TRUE	9.59219e-20	4.13e-21	0.787037	0.148108	47	18	5	2
	chr12	31479025	31479174	TRUE	9.86431e-20	4.25e-21	0.840351	0.218622	53	19	5	2
	chr7	100770279	100770428	TRUE	9.94388e-20	4.29e-21	0.848485	0.197803	56	22	5	2
	chr20	44420476	44420625	TRUE	9.94388e-20	4.29e-21	0.921569	0.112463	26	17	3	1
	chr12	1800147	1800296	TRUE	1.02616e-19	4.43e-21	0.941176	0.156782	28	17	2	1
	chr2	61372166	61372315	TRUE	1.06714e-19	4.61e-21	0.712908	0.176317	60	17	7	3
	chr11	11643504	11643653	TRUE	1.07106e-19	4.63e-21	0.811828	0.185589	56	31	2	1
	chr7	100770285	100770434	TRUE	1.09809e-19	4.75e-21	0.848485	0.198288	56	22	5	2
	chr15	63481628	63481777	TRUE	1.11815e-19	4.84e-21	0.945652	0.221366	37	23	2	1
	chr17	6554959	6555108	TRUE	1.1428e-19	4.95e-21	0.870833	0.159945	43	20	3	2
	chr12	32654994	32655143	TRUE	1.15127e-19	4.99e-21	0.783333	0.184339	52	15	6	3
	chr11	96123035	96123184	TRUE	1.19893e-19	5.2e-21	0.925	0.133511	28	20	2	1
	chr4	8160511	8160660	TRUE	1.20735e-19	5.24e-21	0.865385	0.231575	48	26	3	1
	chr9	88969321	88969470	TRUE	1.20886e-19	5.25e-21	0.932222	0.234329	46	15	5	3
	chr6	27860915	27861064	TRUE	1.21186e-19	5.27e-21	0.721528	0.170893	71	24	5	2
	chr11	71791525	71791674	TRUE	1.21186e-19	5.27e-21	0.753968	0.103159	39	21	3	1
	chr8	27630122	27630271	TRUE	1.23633e-19	5.38e-21	0.984848	0.136518	26	11	3	2
	chr7	26240999	26241148	TRUE	1.23781e-19	5.39e-21	0.85	0.258594	54	20	5	2
	chr2	70995281	70995430	TRUE	1.27142e-19	5.54e-21	0.962963	0.230227	35	27	2	1
	chr13	27745981	27746130	TRUE	1.28205e-19	5.59e-21	0.980769	0.179338	30	26	2	1
	chr1	111682733	111682882	TRUE	1.32246e-19	5.77e-21	0.66358	0.140136	59	27	4	2
	chr2	219524279	219524428	TRUE	1.32617e-19	5.79e-21	0.75463	0.0851914	44	18	4	2
	chr3	143567241	143567390	TRUE	1.37475e-19	6.01e-21	0.560053	0.11752	76	18	8	4
	chr5	141488224	141488373	TRUE	1.37475e-19	6.01e-21	0.805556	0.096643	28	12	2	2
	chr1	108742926	108743075	TRUE	1.37842e-19	6.03e-21	0.947368	0.169241	29	19	2	1
	chr16	81069358	81069507	TRUE	1.39122e-19	6.09e-21	0.756757	0.142601	46	37	2	1
	chr11	57529134	57529283	TRUE	1.40172e-19	6.14e-21	0.84359	0.105743	29	13	4	2
	chr12	114211440	114211589	TRUE	1.42497e-19	6.25e-21	0.697222	0.124315	50	12	8	4
	chr19	19932512	19932661	TRUE	1.42497e-19	6.25e-21	0.741667	0.125959	47	20	3	2
	chr12	49525256	49525405	TRUE	1.44226e-19	6.33e-21	0.98	0.211136	33	25	2	1
	chr1	150849138	150849287	TRUE	1.44587e-19	6.35e-21	0.888889	0.169774	36	15	3	2
	chr2	26624684	26624833	TRUE	1.4563e-19	6.4e-21	0.771605	0.140982	44	27	3	1
	chr7	152456751	152456900	TRUE	1.50993e-19	6.64e-21	0.717949	0.112461	45	26	3	1
	chr18	8609335	8609484	TRUE	1.53975e-19	6.78e-21	0.810345	0.129935	39	29	2	1
	chr18	8609343	8609492	TRUE	1.53975e-19	6.78e-21	0.810345	0.129935	39	29	2	1
	chr1	6639956	6640105	TRUE	1.58641e-19	6.99e-21	1	0.22378	31	15	2	2
	chr2	219134845	219134994	TRUE	1.633e-19	7.2e-21	0.853175	0.195157	41	21	4	1
	chr11	105948192	105948341	TRUE	1.641e-19	7.24e-21	0.952381	0.232058	35	21	2	1
	chr6	57182322	57182471	TRUE	1.66938e-19	7.37e-21	0.746032	0.164149	56	21	5	2
	chr16	83841493	83841642	TRUE	1.73847e-19	7.68e-21	0.969697	0.149283	27	11	3	2
	chr16	56485213	56485362	TRUE	1.75544e-19	7.76e-21	0.840278	0.16953	42	24	3	1
	chr4	6711506	6711655	TRUE	1.80855e-19	8e-21	0.522878	0.144681	92	23	8	4
	chr1	16302579	16302728	TRUE	1.84578e-19	8.17e-21	0.701656	0.203676	89	23	7	3
	chr12	75728363	75728512	TRUE	1.84684e-19	8.18e-21	0.588194	0.117977	73	24	6	3
	chr5	122181171	122181320	TRUE	1.8479e-19	8.19e-21	0.842593	0.125337	31	18	1	1
	chr22	39795659	39795808	TRUE	1.87602e-19	8.32e-21	0.921053	0.107062	29	19	3	1
	chr2	211341383	211341532	TRUE	1.87706e-19	8.33e-21	0.66087	0.124218	53	23	4	2
	chr18	54318454	54318603	TRUE	1.90286e-19	8.45e-21	0.731061	0.149765	52	22	4	2
	chr19	44669149	44669298	TRUE	1.91514e-19	8.51e-21	0.866667	0.107165	29	15	3	1
	chr21	45553394	45553543	TRUE	1.95213e-19	8.68e-21	0.609615	0.151635	59	26	4	2
	chr17	61904408	61904557	TRUE	1.95312e-19	8.69e-21	0.865546	0.215301	52	17	6	3
	chr5	160279171	160279320	TRUE	1.98555e-19	8.84e-21	0.575944	0.102541	112	19	11	5
	chr3	179754469	179754618	TRUE	1.99998e-19	8.91e-21	0.796296	0.104856	34	27	2	1
	chr9	119449446	119449595	TRUE	2.01215e-19	8.97e-21	0.908333	0.115854	28	20	1	1
	chr17	15555212	15555361	TRUE	2.01982e-19	9.01e-21	0.858889	0.249916	50	15	6	3
	chr6	26251779	26251928	TRUE	2.02524e-19	9.04e-21	0.604022	0.234686	110	22	10	5
	chr1	24829287	24829436	TRUE	2.03513e-19	9.09e-21	0.848485	0.126697	33	33	2	1
	chr11	61560050	61560199	TRUE	2.09199e-19	9.35e-21	0.710526	0.140913	42	19	4	2
	chr19	20844354	20844503	TRUE	2.19351e-19	9.81e-21	0.539107	0.155573	71	20	7	3
	chr9	26947210	26947359	TRUE	2.22115e-19	9.94e-21	0.67619	0.125336	45	14	3	3
	chr7	56174139	56174288	TRUE	2.27486e-19	1.02e-20	0.679592	0.146707	48	14	6	3
	chr16	30007347	30007496	TRUE	2.27486e-19	1.02e-20	0.838596	0.208558	55	19	4	2
	chr20	37554855	37555004	TRUE	2.27486e-19	1.02e-20	0.731481	0.145964	53	27	3	1
	chr2	26987042	26987191	TRUE	2.29569e-19	1.03e-20	0.825	0.162623	37	20	3	1
	chr19	46476609	46476758	TRUE	2.3165e-19	1.04e-20	1	0.100203	20	20	1	1
	chr10	62332666	62332815	TRUE	2.33727e-19	1.05e-20	0.51853	0.147246	113	23	9	4
	chr3	120461458	120461607	TRUE	2.35351e-19	1.06e-20	0.664583	0.167969	51	16	5	3
	chr10	43048217	43048366	TRUE	2.35351e-19	1.06e-20	0.810185	0.212106	45	18	4	2
	chr14	23388348	23388497	TRUE	2.35351e-19	1.06e-20	0.808333	0.132951	51	16	5	3
	chr16	84328301	84328450	TRUE	2.35351e-19	1.06e-20	0.633333	0.126956	58	25	4	2
	chr5	175788761	175788910	TRUE	2.39486e-19	1.08e-20	0.69697	0.162606	52	22	4	2
	chr9	132586393	132586542	TRUE	2.39486e-19	1.08e-20	0.896528	0.21849	48	12	5	4
	chr11	6502547	6502696	TRUE	2.4155e-19	1.09e-20	0.692708	0.0954622	36	16	4	2
	chr14	75179750	75179899	TRUE	2.45825e-19	1.11e-20	0.788889	0.0847919	33	15	4	2
	chr1	183604937	183605086	TRUE	2.47724e-19	1.12e-20	0.728667	0.181588	62	25	5	2
	chr7	39773134	39773283	TRUE	2.47724e-19	1.12e-20	0.59478	0.141749	73	26	5	2
	chr2	37458674	37458823	TRUE	2.49777e-19	1.13e-20	0.964286	0.147836	29	14	2	2
	chr14	68283254	68283403	TRUE	2.51828e-19	1.14e-20	0.801282	0.0926212	34	13	3	2
	chr7	66093845	66093994	TRUE	2.55921e-19	1.16e-20	0.907407	0.212367	38	27	2	1
	chr11	94706662	94706811	TRUE	2.55921e-19	1.16e-20	0.847222	0.0868153	30	18	3	1
	chr8	26240794	26240943	TRUE	2.62373e-19	1.19e-20	0.787037	0.145736	35	18	3	1
	chr3	196295365	196295514	TRUE	2.6441e-19	1.2e-20	0.70303	0.129515	63	22	5	2
	chr14	75179759	75179908	TRUE	2.66445e-19	1.21e-20	0.788889	0.0851083	33	15	4	2
	chr17	18759563	18759712	TRUE	2.68477e-19	1.22e-20	0.763393	0.145336	61	16	7	3
	chr19	33463048	33463197	TRUE	2.72706e-19	1.24e-20	0.729167	0.126212	45	16	5	2
	chr12	9102204	9102353	TRUE	2.78951e-19	1.27e-20	0.841667	0.165353	45	20	4	2
	chr15	74753506	74753655	TRUE	2.78951e-19	1.27e-20	0.828704	0.148665	41	18	4	2
	chr4	178230891	178231040	TRUE	2.85001e-19	1.3e-20	0.625	0.091068	46	24	3	1
	chr9	115480339	115480488	TRUE	2.85001e-19	1.3e-20	0.895833	0.172181	40	20	4	2
	chr9	129138686	129138835	TRUE	2.85001e-19	1.3e-20	0.567901	0.178407	101	27	7	3
	chr6	8102733	8102882	TRUE	2.88658e-19	1.32e-20	0.941176	0.130627	25	17	2	1
	chr7	76178558	76178707	TRUE	2.88658e-19	1.32e-20	0.661806	0.121366	66	24	5	2
	chr17	80250642	80250791	TRUE	2.88658e-19	1.32e-20	0.885965	0.118337	30	19	2	1
	chr19	45681903	45682052	TRUE	2.88658e-19	1.32e-20	0.850476	0.263653	74	25	6	2
	chr15	41099607	41099756	TRUE	2.95033e-19	1.35e-20	0.773958	0.156025	40	16	4	2
	chr7	45808515	45808664	TRUE	2.97032e-19	1.36e-20	0.756803	0.181425	49	14	5	3
	chr2	54683354	54683503	TRUE	2.98653e-19	1.37e-20	1	0.172181	26	18	2	1
	chr7	86974911	86975060	TRUE	2.98653e-19	1.37e-20	0.88	0.248995	42	25	3	1
	chr9	684094	684243	TRUE	2.98653e-19	1.37e-20	0.506322	0.107613	86	29	6	2
	chr7	132766780	132766929	TRUE	3.00645e-19	1.38e-20	0.666667	0.14734	58	22	5	2
	chr3	16306438	16306587	TRUE	3.19851e-19	1.47e-20	0.894737	0.104506	32	19	2	1
	chr5	65439985	65440134	TRUE	3.19851e-19	1.47e-20	0.885417	0.155857	38	16	4	2
	chr12	53893223	53893372	TRUE	3.2835e-19	1.51e-20	0.8125	0.155822	36	24	3	1
	chr11	30344549	30344698	TRUE	3.30111e-19	1.52e-20	0.585088	0.156165	56	19	5	2
	chr19	58962871	58963020	TRUE	3.30111e-19	1.52e-20	0.686275	0.131801	37	17	3	2
	chr17	4900857	4901006	TRUE	3.32076e-19	1.53e-20	0.954545	0.142389	26	22	1	1
	chr11	6502577	6502726	TRUE	3.34038e-19	1.54e-20	0.692708	0.104399	37	16	3	2
	chr3	38388140	38388289	TRUE	3.35788e-19	1.55e-20	0.61828	0.121161	49	31	3	1
	chr9	35072691	35072840	TRUE	3.35788e-19	1.55e-20	0.981481	0.196393	31	18	3	1
	chr3	49449478	49449627	TRUE	3.39698e-19	1.57e-20	0.8625	0.183872	37	16	3	2
	chr7	47867018	47867167	TRUE	3.39698e-19	1.57e-20	0.513039	0.140867	111	28	8	3
	chr6	7590332	7590481	TRUE	3.48136e-19	1.61e-20	1	0.114163	21	10	2	2
	chr22	35796016	35796165	TRUE	3.52242e-19	1.63e-20	0.926471	0.18042	32	17	3	1
	chr6	150067640	150067789	TRUE	3.56343e-19	1.65e-20	0.865079	0.125856	38	21	3	1
	chr9	100818582	100818731	TRUE	3.5828e-19	1.66e-20	0.513492	0.111565	84	21	8	4
	chr15	89010584	89010733	TRUE	3.66686e-19	1.7e-20	0.789474	0.145316	44	19	4	2
	chr19	44617250	44617399	TRUE	3.68614e-19	1.71e-20	0.705882	0.109072	44	17	5	2
	chr6	32095969	32096118	TRUE	3.7054e-19	1.72e-20	1	0.138244	23	10	4	2
	chr14	31028277	31028426	TRUE	3.7677e-19	1.75e-20	0.79375	0.12039	39	16	4	2
	chr1	28879429	28879578	TRUE	3.87295e-19	1.8e-20	0.851852	0.165583	37	27	2	1
	chr12	4647589	4647738	TRUE	3.91356e-19	1.82e-20	0.763333	0.112242	46	15	6	3
	chr1	101491309	101491458	TRUE	4.10455e-19	1.91e-20	0.764368	0.149452	48	29	2	1
	chr2	3381550	3381699	TRUE	4.14242e-19	1.93e-20	0.833333	0.112336	31	14	4	2
	chr9	26892358	26892507	TRUE	4.14242e-19	1.93e-20	0.643939	0.0994714	41	22	3	1
	chr20	54967327	54967476	TRUE	4.18276e-19	1.95e-20	0.74375	0.139744	50	16	4	3
	chr7	64254706	64254855	TRUE	4.22046e-19	1.97e-20	0.794872	0.150747	41	13	6	3
	chr18	12308157	12308306	TRUE	4.22046e-19	1.97e-20	0.977778	0.208465	32	15	2	2
	chr2	128051704	128051853	TRUE	4.32491e-19	2.02e-20	0.735965	0.0958618	42	19	4	2
	chr1	66458290	66458439	TRUE	4.34365e-19	2.03e-20	0.554861	0.129105	82	24	6	3
	chr12	49110733	49110882	TRUE	4.36237e-19	2.04e-20	0.759804	0.152225	43	17	5	2
	chr5	133340385	133340534	TRUE	4.37837e-19	2.05e-20	0.944444	0.201802	34	27	2	1
	chr11	6256024	6256173	TRUE	4.37837e-19	2.05e-20	1	0.151238	24	11	3	2
	chr1	236767766	236767915	TRUE	4.39703e-19	2.06e-20	0.869048	0.129791	31	14	4	2
	chr3	157221088	157221237	TRUE	4.43427e-19	2.08e-20	0.448485	0.164314	114	33	6	3
	chr22	38004403	38004552	TRUE	4.43427e-19	2.08e-20	0.747059	0.17241	53	17	6	3
	chr2	242254623	242254772	TRUE	4.45286e-19	2.09e-20	0.778947	0.153645	52	19	5	2
	chr17	27229927	27230076	TRUE	4.81211e-19	2.26e-20	1	0.187231	27	25	2	1
	chr4	153700829	153700978	TRUE	4.83045e-19	2.27e-20	0.811404	0.151424	41	19	2	2
	chr6	123100546	123100695	TRUE	4.84876e-19	2.28e-20	0.911111	0.151786	29	15	3	1
	chr6	109761831	109761980	TRUE	4.86705e-19	2.29e-20	0.947368	0.144726	26	19	1	1
	chr4	53127	53276	TRUE	4.90656e-19	2.31e-20	0.423875	0.12249	140	21	13	6
	chr2	190306059	190306208	TRUE	4.9248e-19	2.32e-20	0.683193	0.122702	49	17	5	2
	chr3	19988453	19988602	TRUE	4.96422e-19	2.34e-20	0.944444	0.0794784	20	9	2	2
	chr9	132515296	132515445	TRUE	5.15201e-19	2.43e-20	0.741935	0.195238	60	31	3	1
	chr3	69788533	69788682	TRUE	5.23363e-19	2.47e-20	0.736842	0.149895	37	19	2	1
	chr3	183966698	183966847	TRUE	5.26959e-19	2.49e-20	0.931818	0.162598	30	11	3	2
	chr12	75905370	75905519	TRUE	5.26959e-19	2.49e-20	0.569549	0.109717	62	19	6	3
	chr4	40859112	40859261	TRUE	5.35099e-19	2.53e-20	0.907407	0.169941	33	27	1	1
	chr3	23958489	23958638	TRUE	5.36887e-19	2.54e-20	0.905556	0.235456	40	18	4	2
	chr19	1905273	1905422	TRUE	5.47124e-19	2.59e-20	0.904762	0.150522	31	21	2	1
	chr1	171454566	171454715	TRUE	5.48903e-19	2.6e-20	0.815873	0.152689	50	15	6	3
	chr1	19638592	19638741	TRUE	5.5068e-19	2.61e-20	0.892857	0.198858	36	28	2	1
	chr16	30007431	30007580	TRUE	5.52455e-19	2.62e-20	0.884375	0.22844	53	16	4	3
	chr20	43594995	43595144	TRUE	5.68979e-19	2.7e-20	1	0.0933412	19	14	2	1
	chr18	658199	658348	TRUE	5.7074e-19	2.71e-20	0.819444	0.225527	46	24	4	1
	chr5	153418451	153418600	TRUE	5.725e-19	2.72e-20	0.7	0.114432	38	25	3	1
	chr7	102987989	102988138	TRUE	5.80217e-19	2.76e-20	0.618277	0.150944	91	17	9	5
	chr14	64108543	64108692	TRUE	5.80217e-19	2.76e-20	0.870536	0.163935	48	16	5	3
	chr11	6624864	6625013	TRUE	5.90371e-19	2.81e-20	0.844828	0.123018	32	29	2	1
	chr20	47804856	47805005	TRUE	5.92115e-19	2.82e-20	1	0.200351	28	17	1	1
	chr1	86174053	86174202	TRUE	6.39251e-19	3.05e-20	0.438752	0.077712	94	29	6	3
	chr3	52029910	52030059	TRUE	6.39251e-19	3.05e-20	0.819444	0.207467	50	24	4	2
	chr5	153418449	153418598	TRUE	6.39251e-19	3.05e-20	0.7	0.114899	38	25	3	1
	chr2	113522206	113522355	TRUE	6.53528e-19	3.12e-20	0.775	0.155654	45	20	4	2
	chr6	109703599	109703748	TRUE	6.63602e-19	3.17e-20	0.948718	0.111939	25	13	2	1
	chr11	57435374	57435523	TRUE	6.64895e-19	3.18e-20	0.894737	0.232338	42	19	4	2
	chr11	85430163	85430312	TRUE	6.64895e-19	3.18e-20	0.626515	0.195206	81	22	7	3
	chr4	38784541	38784690	TRUE	6.74944e-19	3.23e-20	0.431581	0.0995492	135	24	11	5
	chr22	41593457	41593606	TRUE	6.80804e-19	3.26e-20	0.859649	0.142606	36	19	2	1
	chr1	151762962	151763111	TRUE	6.82483e-19	3.27e-20	0.713542	0.168735	41	16	4	2
	chr12	25348046	25348195	TRUE	6.92088e-19	3.32e-20	0.826042	0.185211	43	16	5	2
	chr12	25348050	25348199	TRUE	6.92088e-19	3.32e-20	0.826042	0.185211	43	16	5	2
	chr19	12146477	12146626	TRUE	7.0834e-19	3.4e-20	0.7375	0.137173	39	20	3	1
	chr16	30134582	30134731	TRUE	7.09574e-19	3.41e-20	1	0.0944878	19	14	1	1
	chr19	33072004	33072153	TRUE	7.09574e-19	3.41e-20	0.84058	0.169045	37	23	2	1
	chr1	156217744	156217893	TRUE	7.21627e-19	3.47e-20	0.774242	0.115432	38	11	3	3
	chr15	59042129	59042278	TRUE	7.23275e-19	3.48e-20	0.916667	0.255153	42	24	3	1
	chr16	2034050	2034199	TRUE	7.29074e-19	3.51e-20	0.981481	0.253114	36	27	2	1
	chr1	182808351	182808500	TRUE	7.30715e-19	3.52e-20	0.721528	0.138587	56	24	4	2
	chr5	52405550	52405699	TRUE	7.42727e-19	3.58e-20	0.903226	0.179465	36	31	2	1
	chr16	53241786	53241935	TRUE	7.50578e-19	3.62e-20	0.482913	0.0996865	101	17	11	5
	chr12	8185259	8185408	TRUE	7.62564e-19	3.68e-20	0.92	0.112682	25	25	2	1
	chr19	49588365	49588514	TRUE	7.68323e-19	3.71e-20	0.802222	0.118286	40	15	6	2
	chr5	177580913	177581062	TRUE	7.74075e-19	3.74e-20	0.972222	0.147594	26	12	4	2
	chr1	40506155	40506304	TRUE	7.79821e-19	3.77e-20	0.941667	0.210555	37	20	3	1
	chr4	100484777	100484926	TRUE	7.97963e-19	3.86e-20	0.850877	0.169427	39	19	3	2
	chr4	331496	331645	TRUE	8.09885e-19	3.92e-20	0.869312	0.147473	42	18	4	2
	chr11	10772711	10772860	TRUE	8.50701e-19	4.12e-20	0.833333	0.203575	43	24	3	1
	chr1	35544872	35545021	TRUE	8.66705e-19	4.2e-20	0.811111	0.0956313	27	15	2	1
	chr7	142960464	142960613	TRUE	8.68253e-19	4.21e-20	0.678161	0.133619	66	29	4	2
	chr12	34175116	34175265	TRUE	8.8835e-19	4.31e-20	0.630208	0.10229	56	16	7	3
	chr1	46016398	46016547	TRUE	9.02244e-19	4.38e-20	0.54321	0.145634	65	27	4	2
	chr3	111393423	111393572	TRUE	9.09945e-19	4.42e-20	0.647059	0.13158	61	34	3	1
	chr1	231664299	231664448	TRUE	9.40269e-19	4.57e-20	0.894737	0.103337	24	19	2	1
	chr6	27775661	27775810	TRUE	9.45882e-19	4.6e-20	0.557703	0.117113	60	17	6	3
	chr2	120124356	120124505	TRUE	9.80259e-19	4.77e-20	0.921053	0.124475	26	19	1	1
	chr10	103825047	103825196	TRUE	9.89949e-19	4.82e-20	0.824561	0.144547	36	19	3	1
	chr7	5013516	5013665	TRUE	9.95523e-19	4.85e-20	0.57619	0.0989515	42	21	4	2
	chr2	55459401	55459550	TRUE	9.9845e-19	4.87e-20	0.806429	0.127094	41	10	8	4
	chr14	77923896	77924045	TRUE	9.9845e-19	4.87e-20	0.878571	0.170674	39	14	4	2
	chr13	113242433	113242582	TRUE	1.0204e-18	4.98e-20	0.9375	0.207588	34	16	2	2
	chr1	179923808	179923957	TRUE	1.04171e-18	5.09e-20	0.836458	0.195431	50	16	5	3
	chr2	65357241	65357390	TRUE	1.04171e-18	5.09e-20	0.795139	0.163451	42	24	3	1
	chr1	203274389	203274538	TRUE	1.06911e-18	5.23e-20	0.973684	0.149604	26	19	1	1
	chr20	2644795	2644944	TRUE	1.06911e-18	5.23e-20	0.815625	0.109247	37	16	3	2
	chr1	109506051	109506200	TRUE	1.08687e-18	5.32e-20	0.82	0.180831	48	25	3	1
	chr10	98591939	98592088	TRUE	1.08827e-18	5.33e-20	0.852564	0.137661	37	13	2	2
	chr2	33359577	33359726	TRUE	1.09171e-18	5.35e-20	0.780736	0.178153	55	8	7	6
	chr15	75074325	75074474	TRUE	1.09719e-18	5.38e-20	0.753086	0.129899	43	27	2	1
	chr4	84205916	84206065	TRUE	1.09859e-18	5.39e-20	0.854514	0.273576	68	24	5	2
	chr12	6833121	6833270	TRUE	1.1285e-18	5.54e-20	0.77451	0.104036	33	17	3	1
	chr2	207630002	207630151	TRUE	1.14005e-18	5.6e-20	0.789474	0.129422	36	19	3	1
	chr1	160254883	160255032	TRUE	1.15973e-18	5.7e-20	0.883333	0.125346	30	15	3	2
	chr5	34915720	34915869	TRUE	1.16516e-18	5.73e-20	0.860317	0.172803	45	21	4	2
	chr16	14013914	14014063	TRUE	1.17057e-18	5.76e-20	0.768116	0.203923	55	23	4	2
	chr2	178128217	178128366	TRUE	1.17598e-18	5.79e-20	0.815217	0.139652	39	23	3	1
	chr9	135819943	135820092	TRUE	1.19559e-18	5.89e-20	0.637255	0.0963764	40	17	4	2
	chr1	70671265	70671414	TRUE	1.22938e-18	6.06e-20	1	0.146034	23	17	2	1
	chr1	27998676	27998825	TRUE	1.27733e-18	6.3e-20	0.736842	0.17521	49	19	5	2
	chr17	11900737	11900886	TRUE	1.29077e-18	6.37e-20	0.872807	0.172481	37	19	3	1
	chr17	79633570	79633719	TRUE	1.29332e-18	6.39e-20	0.95	0.18897	32	20	2	1
	chr17	79633577	79633726	TRUE	1.29332e-18	6.39e-20	0.95	0.18897	32	20	2	1
	chr8	145064126	145064275	TRUE	1.29863e-18	6.42e-20	0.609722	0.112494	59	24	3	2
	chr6	28317591	28317740	TRUE	1.32011e-18	6.53e-20	0.464782	0.0999224	102	24	8	4
	chr12	38710457	38710606	TRUE	1.39612e-18	6.91e-20	0.820833	0.164286	40	12	6	3
	chr20	33735095	33735244	TRUE	1.40137e-18	6.94e-20	0.675926	0.156146	55	27	3	2
	chr22	23484193	23484342	TRUE	1.41267e-18	7e-20	0.615	0.169377	85	30	5	2
	chr7	128695150	128695299	TRUE	1.41387e-18	7.01e-20	0.833333	0.162538	49	11	6	4
	chr3	47866376	47866525	TRUE	1.42313e-18	7.06e-20	0.964912	0.147782	28	19	2	1
	chr15	41576101	41576250	TRUE	1.45454e-18	7.22e-20	0.672414	0.135103	55	29	4	1
	chr15	89089836	89089985	TRUE	1.46175e-18	7.26e-20	0.54321	0.115897	61	27	4	2
	chr12	120638966	120639115	TRUE	1.47298e-18	7.32e-20	0.695652	0.177091	51	23	4	2
	chr19	44259094	44259243	TRUE	1.48017e-18	7.36e-20	0.788667	0.189954	49	25	4	1
	chr1	222763207	222763356	TRUE	1.49941e-18	7.46e-20	0.764706	0.0770236	28	17	2	1
	chr6	34393828	34393977	TRUE	1.52265e-18	7.58e-20	0.559649	0.100937	54	19	5	2
	chr3	9404617	9404766	TRUE	1.54185e-18	7.68e-20	1	0.122961	21	15	2	1
	chr15	101835412	101835561	TRUE	1.59313e-18	7.94e-20	0.846667	0.213261	48	25	3	1
	chr9	138853178	138853327	TRUE	1.59422e-18	7.95e-20	0.910714	0.148466	28	14	3	2
	chr16	29973251	29973400	TRUE	1.62737e-18	8.12e-20	0.857143	0.127102	30	21	2	1
	chr5	141348633	141348782	TRUE	1.67851e-18	8.38e-20	0.947917	0.127469	26	16	3	1
	chr3	58613289	58613438	TRUE	1.67858e-18	8.39e-20	0.605333	0.124997	67	25	5	2
	chr10	33247245	33247394	TRUE	1.67858e-18	8.39e-20	0.947917	0.14706	30	16	1	1
	chr9	35658211	35658360	TRUE	1.76559e-18	8.83e-20	0.888889	0.180699	31	18	3	1
	chr21	38362455	38362604	TRUE	1.80255e-18	9.02e-20	0.804167	0.140193	37	10	3	3
	chr7	140714431	140714580	TRUE	1.8135e-18	9.08e-20	0.522034	0.152314	72	13	11	5
	chr1	165738087	165738236	TRUE	1.89829e-18	9.51e-20	0.933333	0.12815	26	15	2	1
	chr1	78245209	78245358	TRUE	1.92314e-18	9.64e-20	0.966667	0.0856519	20	15	2	1
	chr14	31495559	31495708	TRUE	1.96191e-18	9.84e-20	0.738095	0.19146	49	20	5	2
	chr3	160938999	160939148	TRUE	2.01144e-18	1.01e-19	0.764706	0.11993	31	17	3	1
	chr9	131038325	131038474	TRUE	2.01144e-18	1.01e-19	0.818182	0.184106	38	22	3	1
	chr7	14029276	14029425	TRUE	2.0302e-18	1.02e-19	0.72963	0.22218	67	18	7	3
	chr19	37096121	37096270	TRUE	2.04893e-18	1.03e-19	0.833333	0.0981609	32	15	3	2
	chr2	172543882	172544031	TRUE	2.1074e-18	1.06e-19	0.888889	0.0979163	25	12	2	2
	chr11	46638729	46638878	TRUE	2.12607e-18	1.07e-19	0.746914	0.153967	51	27	3	1
	chr8	27695301	27695450	TRUE	2.16457e-18	1.09e-19	0.829861	0.16929	46	24	3	1
	chr14	91976596	91976745	TRUE	2.20303e-18	1.11e-19	0.972222	0.222927	35	18	2	1
	chr1	120254410	120254559	TRUE	2.24145e-18	1.13e-19	0.709957	0.0949667	41	11	8	3
	chr12	122985470	122985619	TRUE	2.29964e-18	1.16e-19	0.858974	0.128587	28	13	2	2
	chr5	122372377	122372526	TRUE	2.31815e-18	1.17e-19	0.789474	0.132879	36	19	3	1
	chr21	46707763	46707912	TRUE	2.35643e-18	1.19e-19	0.865385	0.149128	36	26	2	1
	chr10	101491858	101492007	TRUE	2.41446e-18	1.22e-19	0.883333	0.148622	34	20	3	1
	chr7	35840527	35840676	TRUE	2.43287e-18	1.23e-19	0.822464	0.234669	61	23	5	2
	chr12	112450941	112451090	TRUE	2.47102e-18	1.25e-19	0.916667	0.159414	31	18	3	1
	chr1	161087818	161087967	TRUE	2.54576e-18	1.29e-19	0.895833	0.159599	31	24	2	1
	chr11	47664016	47664165	TRUE	2.54576e-18	1.29e-19	0.913043	0.16198	29	23	2	1
	chr12	129308493	129308642	TRUE	2.54576e-18	1.29e-19	0.916667	0.169652	32	16	4	2
	chr4	74124454	74124603	TRUE	2.58376e-18	1.31e-19	0.885965	0.187108	36	19	2	1
	chr1	153606425	153606574	TRUE	2.61875e-18	1.33e-19	0.820833	0.133498	36	20	3	1
	chr3	196910457	196910606	TRUE	2.61875e-18	1.33e-19	0.449053	0.0881012	124	31	7	4
	chr7	91509968	91510117	TRUE	2.61875e-18	1.33e-19	0.602551	0.140413	68	14	9	4
	chr7	38217833	38217982	TRUE	2.65663e-18	1.35e-19	0.786111	0.16139	43	12	3	3
	chr17	25621006	25621155	TRUE	2.69446e-18	1.37e-19	0.928571	0.119402	25	21	2	1
	chr19	40854245	40854394	TRUE	2.73225e-18	1.39e-19	0.941176	0.12119	23	17	1	1
	chr1	109756501	109756650	TRUE	2.76844e-18	1.41e-19	0.916667	0.190085	34	24	2	1
	chr20	46130575	46130724	TRUE	2.76844e-18	1.41e-19	0.705556	0.182775	55	30	3	1
	chr5	149380123	149380272	TRUE	2.80612e-18	1.43e-19	0.722222	0.153265	49	24	3	2
	chr11	82997071	82997220	TRUE	2.82415e-18	1.44e-19	0.675439	0.152963	59	19	6	3
	chr7	30634371	30634520	TRUE	2.86176e-18	1.46e-19	0.8	0.193118	45	20	4	2
	chr7	44163099	44163248	TRUE	2.87974e-18	1.47e-19	0.833333	0.193403	43	19	4	2
	chr19	21264871	21265020	TRUE	2.8977e-18	1.48e-19	0.67963	0.131838	46	18	5	2
	chr1	113162357	113162506	TRUE	2.914e-18	1.49e-19	0.895833	0.19043	34	16	3	2
	chr2	135809753	135809902	TRUE	2.914e-18	1.49e-19	0.875	0.131078	32	18	2	1
	chr11	65149796	65149945	TRUE	2.93026e-18	1.5e-19	0.796296	0.186145	48	27	3	1
	chr20	47662738	47662887	TRUE	2.93026e-18	1.5e-19	0.898551	0.180553	33	23	2	1
	chr10	134145308	134145457	TRUE	2.98719e-18	1.53e-19	0.775439	0.15894	48	19	4	2
	chr1	249153236	249153385	TRUE	3.1026e-18	1.59e-19	0.830769	0.229684	58	26	4	2
	chr22	36903042	36903191	TRUE	3.13986e-18	1.61e-19	1	0.139878	22	13	1	1
	chr13	115079915	115080064	TRUE	3.15583e-18	1.62e-19	0.9	0.178922	35	20	3	1
	chr19	19144320	19144469	TRUE	3.15583e-18	1.62e-19	0.804348	0.152877	40	23	2	1
	chr5	31193696	31193845	TRUE	3.21247e-18	1.65e-19	0.823529	0.16127	41	17	4	2
	chr7	86848983	86849132	TRUE	3.24959e-18	1.67e-19	0.761905	0.161128	50	21	5	2
	chr7	75677293	75677442	TRUE	3.34501e-18	1.72e-19	0.861111	0.169718	34	12	4	2
	chr16	2097819	2097968	TRUE	3.44033e-18	1.77e-19	0.755556	0.130503	39	15	2	2
	chr1	31769596	31769745	TRUE	3.51611e-18	1.81e-19	0.9	0.150669	32	10	4	3
	chr15	33486849	33486998	TRUE	3.53159e-18	1.82e-19	0.75	0.100534	40	22	3	1
	chr17	18601241	18601390	TRUE	3.53159e-18	1.82e-19	0.883333	0.113432	30	15	3	2
	chr9	66553863	66554012	TRUE	3.58581e-18	1.85e-19	0.8125	0.150859	34	16	2	2
	chr11	64490612	64490761	TRUE	3.58581e-18	1.85e-19	0.78125	0.106605	31	16	1	1
	chr3	197676746	197676895	TRUE	3.6399e-18	1.88e-19	0.644737	0.133474	65	19	6	3
	chr5	137090004	137090153	TRUE	3.6399e-18	1.88e-19	0.848485	0.160415	37	22	3	1
	chr19	1040002	1040151	TRUE	3.77333e-18	1.95e-19	0.578704	0.166026	74	36	4	2
	chr14	35099267	35099416	TRUE	3.82925e-18	1.98e-19	0.681818	0.115641	42	22	3	1
	chr19	40854374	40854523	TRUE	3.96242e-18	2.05e-19	0.894737	0.154047	28	19	2	1
	chr11	57103303	57103452	TRUE	3.97954e-18	2.06e-19	0.759804	0.160335	48	17	4	2
	chr12	94853679	94853828	TRUE	4.03525e-18	2.09e-19	0.824074	0.145832	39	18	3	2
	chr16	68344800	68344949	TRUE	4.07161e-18	2.11e-19	0.719697	0.125687	40	22	3	1
	chr5	140514700	140514849	TRUE	4.16578e-18	2.16e-19	0.422583	0.080277	115	17	13	6
	chr14	100772812	100772961	TRUE	4.2213e-18	2.19e-19	1	0.203651	27	21	2	1
	chr3	195270025	195270174	TRUE	4.23823e-18	2.2e-19	1	0.154454	23	16	2	1
	chr17	37557828	37557977	TRUE	4.27439e-18	2.22e-19	0.753333	0.083334	33	25	2	1
	chr17	43138425	43138574	TRUE	4.32976e-18	2.25e-19	0.884615	0.161616	33	13	5	2
	chr16	70380691	70380840	TRUE	4.36583e-18	2.27e-19	0.777778	0.121045	36	12	4	3
	chr6	7313493	7313642	TRUE	4.38264e-18	2.28e-19	0.95	0.197289	32	20	2	1
	chr10	69835055	69835204	TRUE	4.47628e-18	2.33e-19	0.793651	0.228526	47	21	4	2
	chr3	128598233	128598382	TRUE	4.58901e-18	2.39e-19	0.793651	0.189131	38	21	3	1
	chr17	40950656	40950805	TRUE	4.60567e-18	2.4e-19	0.8	0.16157	35	15	3	2
	chr6	83902932	83903081	TRUE	4.62231e-18	2.41e-19	0.809524	0.114749	30	21	2	1
	chr8	117768014	117768163	TRUE	4.67727e-18	2.44e-19	0.798611	0.0813908	28	12	4	2
	chr1	40626941	40627090	TRUE	4.69385e-18	2.45e-19	0.716667	0.126712	45	20	3	2
	chr2	224822021	224822170	TRUE	4.71042e-18	2.46e-19	0.928571	0.133388	26	14	3	1
	chr2	12147154	12147303	TRUE	4.78438e-18	2.5e-19	0.747619	0.138993	45	14	6	3
	chr3	129158804	129158953	TRUE	4.83913e-18	2.53e-19	0.787037	0.150168	43	18	4	2
	chr12	51566869	51567018	TRUE	4.89382e-18	2.56e-19	0.734259	0.189662	50	18	4	2
	chr1	151431884	151432033	TRUE	5.06031e-18	2.65e-19	0.857843	0.233822	43	17	4	2
	chr12	57940930	57941079	TRUE	5.06031e-18	2.65e-19	0.84	0.196433	45	10	4	4
	chr22	29949596	29949745	TRUE	5.2293e-18	2.74e-19	0.7375	0.144743	44	20	3	2
	chr6	33422256	33422405	TRUE	5.3981e-18	2.83e-19	0.875	0.191812	36	24	2	1
	chr14	59655299	59655448	TRUE	5.41421e-18	2.84e-19	0.854167	0.162967	33	12	5	2
	chr5	156569738	156569887	TRUE	5.69393e-18	2.99e-19	0.690476	0.132307	44	21	3	2
	chr19	17416377	17416526	TRUE	5.69393e-18	2.99e-19	0.93125	0.294136	53	24	4	2
	chr3	69925391	69925540	TRUE	5.76695e-18	3.03e-19	0.361989	0.0818644	129	18	14	7
	chr7	44646071	44646220	TRUE	5.82086e-18	3.06e-19	0.745098	0.157462	42	17	5	2
	chr6	136610941	136611090	TRUE	5.83669e-18	3.07e-19	0.896825	0.208609	40	21	3	1
	chr2	219536733	219536882	TRUE	5.89051e-18	3.1e-19	0.801042	0.191473	52	16	5	3
	chr2	152830406	152830555	TRUE	5.93778e-18	3.13e-19	0.595238	0.145379	79	24	6	3
	chr13	73301890	73302039	TRUE	5.93778e-18	3.13e-19	0.88	0.2204	39	20	3	1
	chr19	10362540	10362689	TRUE	5.93778e-18	3.13e-19	0.793651	0.182374	47	21	4	2
	chr13	21750662	21750811	TRUE	6.06727e-18	3.2e-19	0.841667	0.125043	38	20	3	1
	chr7	93633642	93633791	TRUE	6.12081e-18	3.23e-19	0.733333	0.114698	40	14	5	2
	chr7	96339155	96339304	TRUE	6.19324e-18	3.27e-19	0.883333	0.163962	39	14	5	2
	chr2	242626179	242626328	TRUE	6.24326e-18	3.3e-19	0.877193	0.154877	30	19	2	1
	chr7	75677250	75677399	TRUE	6.24326e-18	3.3e-19	0.809524	0.163473	37	14	4	2
	chr3	121553934	121554083	TRUE	6.25878e-18	3.31e-19	0.894737	0.220781	39	19	3	2
	chr12	125549825	125549974	TRUE	6.27428e-18	3.32e-19	0.87037	0.123824	27	18	1	1
	chr11	450180	450329	TRUE	6.30865e-18	3.34e-19	0.916667	0.189309	31	18	2	1
	chr4	77069607	77069756	TRUE	6.36186e-18	3.37e-19	0.770833	0.16103	46	16	5	2
	chr19	19144300	19144449	TRUE	6.45275e-18	3.42e-19	0.730769	0.147889	46	26	2	1
	chr11	94706728	94706877	TRUE	6.48696e-18	3.44e-19	0.944444	0.114653	22	18	2	1
	chr1	27648536	27648685	TRUE	6.52114e-18	3.46e-19	0.92029	0.14481	29	23	2	1
	chr17	80023632	80023781	TRUE	6.55529e-18	3.48e-19	0.727273	0.120655	34	22	3	1
	chr5	21459534	21459683	TRUE	6.79649e-18	3.61e-19	0.681034	0.11906	50	29	3	1
	chr17	36981541	36981690	TRUE	6.81163e-18	3.62e-19	0.744444	0.0979454	33	15	4	2
	chr15	68724444	68724593	TRUE	7.05243e-18	3.75e-19	0.84	0.125086	29	25	1	1
	chr15	41624826	41624975	TRUE	7.08622e-18	3.77e-19	0.871795	0.191861	38	13	5	2
	chr12	53895277	53895426	TRUE	7.28904e-18	3.88e-19	0.988889	0.369635	47	30	2	1
	chr1	151512681	151512830	TRUE	7.47286e-18	3.98e-19	0.735833	0.175683	67	20	6	3
	chr3	114866079	114866228	TRUE	7.4876e-18	3.99e-19	0.77381	0.126043	38	14	6	2
	chr14	96001161	96001310	TRUE	7.50232e-18	4e-19	0.819444	0.160278	44	18	4	2
	chr12	110906016	110906165	TRUE	7.70033e-18	4.11e-19	0.897436	0.145392	31	13	5	2
	chr12	110906021	110906170	TRUE	7.70033e-18	4.11e-19	0.897436	0.145392	31	13	5	2
	chr17	26972125	26972274	TRUE	7.71491e-18	4.12e-19	1	0.158729	23	18	2	1
	chr19	37019122	37019271	TRUE	7.91663e-18	4.23e-19	0.857143	0.0865434	25	14	2	1
	chr5	148442689	148442838	TRUE	7.93108e-18	4.24e-19	0.802083	0.16382	48	32	2	1
	chr19	35417707	35417856	TRUE	7.94551e-18	4.25e-19	0.575689	0.114723	67	19	5	3
	chr5	179050622	179050771	TRUE	8.01599e-18	4.29e-19	0.883333	0.258845	55	21	4	2
	chr3	4508906	4509055	TRUE	8.19844e-18	4.39e-19	0.759259	0.124062	36	18	3	2
	chr10	104005159	104005308	TRUE	8.41802e-18	4.51e-19	0.859163	0.353317	107	18	9	5
	chr5	79287040	79287189	TRUE	8.45082e-18	4.53e-19	0.881944	0.12725	31	12	4	2
	chr10	86004709	86004858	TRUE	8.52087e-18	4.57e-19	0.938542	0.222881	39	16	3	2
	chr22	39077854	39078003	TRUE	8.55358e-18	4.59e-19	0.903846	0.219989	41	26	3	1
	chr11	82997329	82997478	TRUE	8.60487e-18	4.62e-19	0.732609	0.185725	72	23	6	3
	chr3	25467920	25468069	TRUE	8.71196e-18	4.68e-19	0.443254	0.107602	104	21	9	4
	chr2	64880998	64881147	TRUE	8.81893e-18	4.74e-19	0.9375	0.198047	29	16	2	1
	chr6	31628501	31628650	TRUE	8.87001e-18	4.77e-19	0.862319	0.137033	32	23	2	1
	chr6	20534588	20534737	TRUE	8.88385e-18	4.78e-19	0.619048	0.116493	57	14	8	4
	chr16	29801981	29802130	TRUE	8.95341e-18	4.82e-19	0.837121	0.184146	37	22	3	1
	chr2	136288252	136288401	TRUE	9.01809e-18	4.86e-19	0.497619	0.0915303	50	14	6	3
	chr10	95256289	95256438	TRUE	9.01809e-18	4.86e-19	0.785714	0.252459	54	21	4	2
	chr1	2323114	2323263	TRUE	9.03183e-18	4.87e-19	0.777778	0.215316	49	27	3	1
	chr22	51222039	51222188	TRUE	9.10116e-18	4.91e-19	0.810606	0.113497	38	22	2	1
	chr16	77224736	77224885	TRUE	9.13336e-18	4.93e-19	0.8125	0.157461	38	16	3	2
	chr12	105501392	105501541	TRUE	9.14702e-18	4.94e-19	0.689655	0.161344	44	29	3	1
	chr6	46620475	46620624	TRUE	9.25319e-18	5e-19	0.761111	0.0746056	30	15	3	2
	chr2	219524360	219524509	TRUE	9.34075e-18	5.05e-19	0.791667	0.102483	35	16	4	2
	chr2	152266300	152266449	TRUE	9.44671e-18	5.11e-19	0.833333	0.099431	28	19	2	1
	chr5	86708673	86708822	TRUE	9.70037e-18	5.25e-19	1	0.1219	20	12	3	1
	chr7	37488482	37488631	TRUE	9.71369e-18	5.26e-19	0.637558	0.240881	95	31	6	3
	chr14	74960036	74960185	TRUE	9.78237e-18	5.3e-19	0.9	0.148858	27	15	2	1
	chr7	37488463	37488612	TRUE	9.83252e-18	5.33e-19	0.619365	0.235827	101	30	6	3
	chr13	76111943	76112092	TRUE	9.86419e-18	5.35e-19	0.621739	0.117924	66	23	5	2
	chr9	37753702	37753851	TRUE	9.91425e-18	5.38e-19	0.861111	0.137672	32	18	3	1
	chr11	43702043	43702192	TRUE	1.00011e-17	5.43e-19	0.964286	0.0938546	20	7	3	2
	chr19	58011209	58011358	TRUE	1.00142e-17	5.44e-19	0.808333	0.0973054	26	10	2	2
	chr21	26979753	26979902	TRUE	1.01377e-17	5.51e-19	0.530392	0.137549	46	17	5	2
	chr2	232645926	232646075	TRUE	1.01691e-17	5.53e-19	0.764493	0.144918	47	23	3	2
	chr15	74286901	74287050	TRUE	1.02924e-17	5.6e-19	0.861905	0.185045	37	14	4	2
	chr5	140430879	140431028	TRUE	1.04523e-17	5.69e-19	0.355291	0.124627	170	30	11	5
	chr8	97247814	97247963	TRUE	1.04835e-17	5.71e-19	0.784722	0.160628	42	24	3	1
	chr12	44152653	44152802	TRUE	1.05147e-17	5.73e-19	0.9	0.116248	26	20	2	1
	chr16	55512981	55513130	TRUE	1.06192e-17	5.79e-19	0.62	0.152088	53	25	3	2
	chr9	114423761	114423910	TRUE	1.06502e-17	5.81e-19	0.712121	0.125362	36	22	3	1
	chr7	100303576	100303725	TRUE	1.08828e-17	5.94e-19	0.931373	0.209291	35	17	4	2
	chr9	98638211	98638360	TRUE	1.09137e-17	5.96e-19	0.856481	0.226211	46	18	3	2
	chr16	56485336	56485485	TRUE	1.09263e-17	5.97e-19	0.829825	0.201139	49	19	5	2
	chr19	36236288	36236437	TRUE	1.09571e-17	5.99e-19	0.647619	0.182507	61	21	5	2
	chr19	38085677	38085826	TRUE	1.10428e-17	6.04e-19	0.953704	0.160686	28	18	2	1
	chr1	154955717	154955866	TRUE	1.15303e-17	6.31e-19	0.783333	0.164129	46	11	6	4
	chr4	73935424	73935573	TRUE	1.15973e-17	6.35e-19	0.759259	0.192704	59	27	4	2
	chr17	35306075	35306224	TRUE	1.1646e-17	6.38e-19	0.773148	0.140713	48	18	5	2
	chr16	2021964	2022113	TRUE	1.17494e-17	6.44e-19	0.786232	0.19026	55	23	5	2
	chr19	11529956	11530105	TRUE	1.19256e-17	6.54e-19	0.716049	0.148853	44	27	2	1
	chr9	113018785	113018934	TRUE	1.20469e-17	6.61e-19	0.765432	0.179633	48	27	3	1
	chr19	11485283	11485432	TRUE	1.21317e-17	6.66e-19	0.706349	0.116211	43	21	3	2
	chr18	61637163	61637312	TRUE	1.21981e-17	6.7e-19	0.701984	0.0856603	64	18	7	3
	chr9	131133540	131133689	TRUE	1.22463e-17	6.73e-19	0.841667	0.141482	36	20	3	1
	chr6	26056651	26056800	TRUE	1.23426e-17	6.79e-19	0.663244	0.205507	99	32	6	3
	chr22	19132098	19132247	TRUE	1.23426e-17	6.79e-19	0.742424	0.10053	33	22	2	1
	chr5	153418459	153418608	TRUE	1.23543e-17	6.8e-19	0.717391	0.117541	35	23	3	1
	chr11	82996971	82997120	TRUE	1.25113e-17	6.89e-19	0.726852	0.13685	39	18	4	2
	chr8	41435619	41435768	TRUE	1.25229e-17	6.9e-19	0.973684	0.15419	25	19	2	1
	chr14	91526945	91527094	TRUE	1.27159e-17	7.01e-19	0.75	0.147162	42	16	5	2
	chr7	2883911	2884060	TRUE	1.28e-17	7.06e-19	0.924603	0.248738	44	21	3	2
	chr12	50677305	50677454	TRUE	1.2902e-17	7.12e-19	0.857143	0.112686	31	14	2	2
	chr18	47792817	47792966	TRUE	1.3004e-17	7.18e-19	0.828125	0.124061	34	16	4	2
	chr12	112563264	112563413	TRUE	1.30334e-17	7.2e-19	0.95	0.205133	32	20	2	1
	chr11	105948138	105948287	TRUE	1.30922e-17	7.24e-19	0.941176	0.223497	31	17	3	1
	chr12	54653281	54653430	TRUE	1.30922e-17	7.24e-19	0.845833	0.179042	46	20	4	2
	chr7	134001755	134001904	TRUE	1.31577e-17	7.28e-19	0.838596	0.167873	37	19	3	1
	chr11	12399046	12399195	TRUE	1.32343e-17	7.33e-19	0.972222	0.107052	21	18	1	1
	chr19	39138227	39138376	TRUE	1.32343e-17	7.33e-19	0.72619	0.139431	51	21	4	2
	chr20	34638834	34638983	TRUE	1.34079e-17	7.43e-19	0.916667	0.128126	27	22	2	1
	chr3	129147446	129147595	TRUE	1.35022e-17	7.49e-19	0.715909	0.135403	52	22	3	2
	chr16	50775861	50776010	TRUE	1.35022e-17	7.49e-19	1	0.200843	26	15	1	1
	chr15	80364825	80364974	TRUE	1.36754e-17	7.59e-19	0.682637	0.15595	68	10	14	6
	chr13	31040033	31040182	TRUE	1.37403e-17	7.63e-19	0.853175	0.303281	61	21	6	2
	chr3	48956181	48956330	TRUE	1.38052e-17	7.67e-19	0.966667	0.151105	27	20	2	1
	chr10	120925156	120925305	TRUE	1.3888e-17	7.72e-19	0.526667	0.116821	43	25	3	1
	chr16	68344845	68344994	TRUE	1.41685e-17	7.88e-19	0.733333	0.143958	38	20	3	1
	chr10	105881716	105881865	TRUE	1.44308e-17	8.03e-19	0.727273	0.210361	50	22	4	2
	chr1	101491314	101491463	TRUE	1.46029e-17	8.13e-19	0.755952	0.151965	46	28	2	1
	chr19	36119880	36120029	TRUE	1.4739e-17	8.21e-19	0.685606	0.163373	51	22	4	2
	chr19	53496736	53496885	TRUE	1.47494e-17	8.22e-19	0.862745	0.104192	30	17	3	1
	chr2	97523708	97523857	TRUE	1.47956e-17	8.25e-19	0.934783	0.170769	31	23	2	1
	chr1	145096307	145096456	TRUE	1.52002e-17	8.48e-19	0.85	0.13574	37	16	4	2
	chr12	6833145	6833294	TRUE	1.52282e-17	8.5e-19	0.736842	0.109989	34	19	2	1
	chr15	59397220	59397369	TRUE	1.52562e-17	8.52e-19	0.731481	0.121226	37	18	3	2
	chr20	33999785	33999934	TRUE	1.53915e-17	8.6e-19	0.773529	0.104691	35	17	4	2
	chr1	114355022	114355171	TRUE	1.54015e-17	8.61e-19	0.891304	0.208362	37	23	3	1
	chr4	156680115	156680264	TRUE	1.58763e-17	8.88e-19	0.561728	0.162951	56	27	3	2
	chr1	192778071	192778220	TRUE	1.61183e-17	9.02e-19	0.628869	0.224594	91	32	5	2
	chr17	39845027	39845176	TRUE	1.63958e-17	9.18e-19	0.822727	0.179418	44	22	3	2
	chr3	98241862	98242011	TRUE	1.67444e-17	9.38e-19	0.880952	0.239231	45	21	4	2
	chr3	43732275	43732424	TRUE	1.69321e-17	9.49e-19	0.769231	0.124414	39	26	2	1
	chr5	68665787	68665936	TRUE	1.69326e-17	9.5e-19	0.779412	0.144904	38	17	4	2
	chr5	68665792	68665941	TRUE	1.69326e-17	9.5e-19	0.779412	0.144904	38	17	4	2
	chr6	35310235	35310384	TRUE	1.69774e-17	9.53e-19	0.941176	0.144351	24	17	2	1
	chr11	63448822	63448971	TRUE	1.76631e-17	9.92e-19	0.851852	0.163486	42	27	3	1
	chr13	41706975	41707124	TRUE	1.77964e-17	1e-18	0.819231	0.196348	48	13	7	3
	chr1	19483371	19483520	TRUE	1.7956e-17	1.01e-18	0.402508	0.111017	140	17	16	8
	chr16	2255642	2255791	TRUE	1.7956e-17	1.01e-18	0.756667	0.106532	43	25	2	1
	chr5	10441909	10442058	TRUE	1.81245e-17	1.02e-18	0.82	0.179322	36	25	2	1
	chr14	76127521	76127670	TRUE	1.82929e-17	1.03e-18	0.816026	0.200568	58	26	4	2
	chr2	84743479	84743628	TRUE	1.84611e-17	1.04e-18	0.576923	0.119656	40	26	3	1
	chr10	16859405	16859554	TRUE	1.86291e-17	1.05e-18	0.754167	0.141058	41	16	4	2
	chr14	35515510	35515659	TRUE	1.89742e-17	1.07e-18	0.677419	0.165908	58	31	3	1
	chr7	128695180	128695329	TRUE	1.91418e-17	1.08e-18	0.811806	0.164677	51	12	6	4
	chr5	140346012	140346161	TRUE	1.93092e-17	1.09e-18	0.9	0.142076	26	20	2	1
	chr1	249153223	249153372	TRUE	1.98205e-17	1.12e-18	0.826923	0.226871	54	26	3	2
	chr12	117348661	117348810	TRUE	1.98205e-17	1.12e-18	0.7875	0.135147	35	20	3	1
	chr4	926126	926275	TRUE	1.99771e-17	1.13e-18	0.946429	0.16468	28	14	2	2
	chr15	89010585	89010734	TRUE	1.99771e-17	1.13e-18	0.791667	0.147564	40	18	4	2
	chr3	196669344	196669493	TRUE	2.06528e-17	1.17e-18	0.886364	0.223807	36	22	3	1
	chr7	2394374	2394523	TRUE	2.06528e-17	1.17e-18	0.599802	0.210844	93	24	7	3
	chr19	57702769	57702918	TRUE	2.06528e-17	1.17e-18	0.833333	0.10083	26	16	2	1
	chr5	32174377	32174526	TRUE	2.09845e-17	1.19e-18	0.880435	0.232361	44	23	2	1
	chr5	122110650	122110799	TRUE	2.09845e-17	1.19e-18	0.925	0.141359	28	20	2	1
	chr6	37225448	37225597	TRUE	2.11394e-17	1.2e-18	0.762821	0.14105	46	26	3	1
	chr10	42970976	42971125	TRUE	2.11394e-17	1.2e-18	0.509821	0.134991	76	24	5	3
	chr4	39183924	39184073	TRUE	2.13048e-17	1.21e-18	0.858974	0.171532	33	13	3	2
	chr18	58039953	58040102	TRUE	2.147e-17	1.22e-18	0.432609	0.0861786	81	23	7	3
	chr7	92157987	92158136	TRUE	2.16351e-17	1.23e-18	0.878431	0.258111	54	17	6	3
	chr5	173472624	173472773	TRUE	2.17999e-17	1.24e-18	0.619792	0.145552	58	32	3	1
	chr3	122747404	122747553	TRUE	2.19646e-17	1.25e-18	0.615043	0.23224	76	22	7	3
	chr19	58898536	58898685	TRUE	2.21292e-17	1.26e-18	0.85119	0.224239	43	14	6	3
	chr1	43833651	43833800	TRUE	2.22936e-17	1.27e-18	0.892857	0.142964	26	14	1	1
	chr7	66147051	66147200	TRUE	2.26332e-17	1.29e-18	0.75	0.172153	41	20	3	2
	chr6	30614701	30614850	TRUE	2.2961e-17	1.31e-18	0.565657	0.155233	89	33	5	2
	chr9	139305006	139305155	TRUE	2.2961e-17	1.31e-18	0.808642	0.173202	43	27	2	1
	chr21	33651328	33651477	TRUE	2.31246e-17	1.32e-18	0.677778	0.171437	57	24	4	2
	chr6	18387494	18387643	TRUE	2.36382e-17	1.35e-18	0.627451	0.100294	31	17	1	1
	chr7	135194803	135194952	TRUE	2.38014e-17	1.36e-18	0.921053	0.187985	30	19	2	1
	chr1	35497521	35497670	TRUE	2.41271e-17	1.38e-18	0.694286	0.144624	43	15	6	2
	chr13	29292914	29293063	TRUE	2.41271e-17	1.38e-18	0.789474	0.134444	33	19	1	1
	chr14	21852377	21852526	TRUE	2.46392e-17	1.41e-18	0.633214	0.175598	71	20	5	3
	chr10	102790831	102790980	TRUE	2.49762e-17	1.43e-18	0.546296	0.143531	70	36	3	1
	chr12	56223372	56223521	TRUE	2.60111e-17	1.49e-18	0.923077	0.143933	26	13	3	2
	chr16	28565157	28565306	TRUE	2.6347e-17	1.51e-18	0.705357	0.117929	49	14	6	3
	chr3	12838071	12838220	TRUE	2.73802e-17	1.57e-18	0.833333	0.144462	34	27	2	1
	chr20	61569226	61569375	TRUE	2.75408e-17	1.58e-18	0.8125	0.121597	26	16	3	1
	chr15	49913003	49913152	TRUE	2.77012e-17	1.59e-18	1	0.128859	20	11	2	1
	chr12	64173537	64173686	TRUE	2.80356e-17	1.61e-18	0.966667	0.123436	22	15	1	1
	chr16	71496069	71496218	TRUE	2.9762e-17	1.71e-18	0.62	0.12429	59	25	4	2
[truncated: 32,793 more rows]

## Sheet: SuppTable6-TSS-NS248-NDRs
All	chr	start	end	FDR<0.01	FDR	raw_p_value	GCH_methylation_in_window	GCH_methylation_in_adjacent_4kb_window	GCH_data_point_in_window	GCH_number_in_window	GCH_reads_depth_in_window	GCH_CT_reads_depth_in_window
Coordinates	chr1	569433	569582	TRUE	0	0	0.867165	0.28179	1110	16	151	69
hg19	chr10	46640955	46641104	TRUE	0	0	0.0625	0	14	8	1	1
	chr11	89653528	89653677	TRUE	0	0	0.0357143	0	19	7	4	2
	chr1	564939	565088	TRUE	5.84534e-117	6.31792e-121	0.602166	0.0906077	197	16	24	12
	chr7	102553352	102553501	TRUE	6.9436e-115	9.38121e-119	0.690217	0.109965	277	23	24	12
Includes all	chr7	43965947	43966096	TRUE	2.92406e-94	5.53081e-98	0.854924	0.117739	165	44	7	3
UCSC genes	chr7	43965948	43966097	TRUE	2.92406e-94	5.53081e-98	0.854924	0.117739	165	44	7	3
with 10 or	chr7	28725621	28725770	TRUE	7.51165e-91	1.62379e-94	0.835964	0.170904	213	23	18	9
more GCH	chr21	48024987	48025136	TRUE	3.88141e-89	9.43922e-93	0.968056	0.192573	148	36	8	4
datapoints.	chr21	30517800	30517949	TRUE	4.56092e-85	1.23241e-88	0.787511	0.128088	174	21	16	8
Those called	chr7	64126411	64126560	TRUE	1.21483e-82	3.61087e-86	0.81714	0.14821	165	31	10	5
as NDRs in the	chr9	95640242	95640391	TRUE	1.00654e-79	3.26375e-83	0.784609	0.123846	156	23	13	6
paper had FDR	chr7	112758589	112758738	TRUE	1.41698e-75	4.97751e-79	0.706146	0.0807137	146	19	15	7
adjusted	chr4	74088737	74088886	TRUE	4.64403e-75	1.75682e-78	0.802381	0.112458	141	22	13	6
p-value<0.01	chr8	92082276	92082425	TRUE	4.18509e-73	1.69629e-76	0.781568	0.0993016	115	29	8	3
	chr4	139163455	139163604	TRUE	1.31586e-72	5.68899e-76	0.685654	0.0898444	184	31	12	5
	chr12	54718811	54718960	TRUE	7.03991e-72	3.23385e-75	0.932071	0.182154	129	28	9	4
	chr7	44240478	44240627	TRUE	8.66061e-72	4.21236e-75	0.892049	0.102759	115	27	8	4
	chr21	35899213	35899362	TRUE	5.18062e-71	2.65974e-74	0.871652	0.161629	133	16	16	8
	chr19	41903208	41903357	TRUE	8.06744e-71	4.35984e-74	0.8075	0.140546	149	30	10	4
	chr4	122722372	122722521	TRUE	1.3752e-70	7.8035e-74	0.837058	0.120399	123	31	8	3
	chr4	71587598	71587747	TRUE	6.01905e-70	3.57812e-73	0.635394	0.0739621	158	23	14	6
	chr8	104033148	104033297	TRUE	2.19832e-69	1.36623e-72	0.835417	0.0707279	95	32	5	2
	chr9	115818948	115819097	TRUE	5.23952e-69	3.39787e-72	0.897531	0.102752	91	27	6	3
	chr7	23636898	23637047	TRUE	1.18545e-68	8.00807e-72	0.755644	0.112795	135	27	10	5
	chr2	86333238	86333387	TRUE	1.25991e-68	8.85148e-72	0.887392	0.1519	115	22	10	5
	chr7	86781628	86781777	TRUE	1.69919e-68	1.23968e-71	0.922273	0.123199	102	31	6	3
	chr7	158649169	158649318	TRUE	2.46557e-68	1.86543e-71	0.84625	0.136749	127	40	6	3
	chr7	142985302	142985451	TRUE	8.72137e-68	6.83419e-71	0.79889	0.148815	141	27	11	5
	chr7	42971839	42971988	TRUE	4.48047e-67	3.63202e-70	0.849878	0.183165	151	24	13	6
	chr7	123197910	123198059	TRUE	1.78565e-66	1.49576e-69	0.733862	0.145981	191	21	18	9
	chr9	123883979	123884128	TRUE	2.34494e-66	2.02762e-69	0.69928	0.122146	160	27	11	5
	chr5	173472624	173472773	TRUE	3.31736e-66	2.95808e-69	0.645161	0.106785	119	31	7	3
	chr7	127983914	127984063	TRUE	7.78273e-66	7.15016e-69	0.87291	0.105949	104	16	13	6
	chr7	75508217	75508366	TRUE	2.15366e-64	2.03681e-67	0.933333	0.136693	93	28	6	3
	chr7	6388542	6388691	TRUE	2.96974e-64	2.88886e-67	0.729134	0.163623	152	28	9	5
	chr8	67974523	67974672	TRUE	1.34331e-62	1.34302e-65	0.729012	0.0893114	122	18	13	6
	chr7	131012538	131012687	TRUE	6.89133e-62	7.07605e-65	0.905729	0.131236	101	32	5	3
	chr7	42971757	42971906	TRUE	8.21367e-62	8.65578e-65	0.808493	0.149139	131	19	13	6
	chr8	104033191	104033340	TRUE	1.69406e-61	1.83102e-64	0.847778	0.0843247	84	30	4	2
	chr10	1034249	1034398	TRUE	5.52807e-61	6.12437e-64	0.942857	0.108934	78	21	7	3
	chr1	53480462	53480611	TRUE	1.84882e-60	2.0982e-63	0.541171	0.0681541	189	26	14	7
	chr9	116172904	116173053	TRUE	3.60474e-60	4.18838e-63	0.969872	0.168852	90	26	6	3
	chr7	23145274	23145423	TRUE	1.58186e-59	1.88072e-62	0.822222	0.0913578	95	27	7	3
	chr17	45569799	45569948	TRUE	2.3573e-59	2.86636e-62	0.943991	0.119118	77	21	7	3
	chr10	105127624	105127773	TRUE	3.30936e-59	4.11345e-62	0.876587	0.129325	99	24	8	4
	chr7	30066220	30066369	TRUE	6.84102e-59	8.68807e-62	0.813305	0.119305	110	17	13	6
	chr9	127177673	127177822	TRUE	1.14407e-58	1.48388e-61	0.962963	0.119626	74	18	6	4
	chr19	14530123	14530272	TRUE	4.02639e-58	5.3311e-61	0.925	0.177237	100	26	7	3
	chr7	100209625	100209774	TRUE	6.96701e-58	9.41284e-61	0.835529	0.126713	106	13	17	8
	chr8	50822249	50822398	TRUE	1.07443e-57	1.48065e-60	0.869921	0.129109	99	30	6	3
	chr7	121513059	121513208	TRUE	2.31546e-57	3.25345e-60	0.80914	0.157763	130	31	8	4
	chr7	116660172	116660321	TRUE	5.13532e-57	7.3544e-60	0.570578	0.0819583	180	35	10	5
	chr4	39460565	39460714	TRUE	7.36488e-57	1.07464e-59	0.910204	0.126338	85	21	8	4
	chr5	121297556	121297705	TRUE	1.48527e-56	2.20735e-59	0.906061	0.107887	81	22	6	3
	chr12	111051780	111051929	TRUE	2.7808e-56	4.20786e-59	0.976562	0.116486	68	32	4	2
	chr7	99149668	99149817	TRUE	4.07788e-56	6.28078e-59	0.755269	0.0978658	107	18	12	5
	chr9	125027053	125027202	TRUE	5.15243e-56	8.07503e-59	0.825992	0.100705	91	24	7	3
	chr3	179322386	179322535	TRUE	7.86651e-56	1.25412e-58	0.820076	0.128052	102	22	8	4
	chr9	101984198	101984347	TRUE	1.03785e-55	1.68264e-58	0.833965	0.174983	140	25	11	5
	chr2	86333230	86333379	TRUE	1.31664e-55	2.17021e-58	0.796483	0.153086	120	22	10	5
	chr7	129845290	129845439	TRUE	1.64349e-55	2.75335e-58	0.814437	0.145266	117	21	11	5
	chr3	159557662	159557811	TRUE	1.67526e-55	2.85185e-58	0.942473	0.157459	88	31	5	2
	chr9	125027047	125027196	TRUE	2.27248e-55	3.92993e-58	0.792952	0.100705	92	25	7	3
	chr9	125027042	125027191	TRUE	2.4527e-55	4.30786e-58	0.792952	0.100832	92	25	7	3
	chr8	67974514	67974663	TRUE	2.72724e-55	4.86375e-58	0.724653	0.0893114	109	16	13	6
	chr7	25164907	25165056	TRUE	3.09247e-55	5.59867e-58	0.831527	0.136919	119	29	8	4
	chr1	222817564	222817713	TRUE	3.14158e-55	5.77246e-58	0.829487	0.129282	92	26	7	3
	chr7	84816123	84816272	TRUE	3.57133e-55	6.6586e-58	0.779259	0.216037	164	45	7	3
	chr2	170430376	170430525	TRUE	5.88047e-55	1.11228e-57	0.843937	0.142935	98	18	10	5
	chr15	65809987	65810136	TRUE	6.47914e-55	1.24302e-57	0.862698	0.135721	109	30	6	3
	chr21	44313278	44313427	TRUE	6.69757e-55	1.30303e-57	0.843137	0.199875	132	34	7	3
	chr7	151038758	151038907	TRUE	6.7404e-55	1.32957e-57	0.674694	0.158687	145	35	8	4
	chr9	116172922	116173071	TRUE	1.46682e-54	2.93301e-57	0.968667	0.17154	83	25	6	3
	chr19	42746688	42746837	TRUE	2.13719e-54	4.3312e-57	0.96875	0.158932	82	32	4	2
	chr7	149569957	149570106	TRUE	5.07143e-54	1.04147e-56	0.662079	0.13532	167	21	15	7
	chr3	50329871	50330020	TRUE	5.19772e-54	1.08145e-56	1	0.133515	64	24	5	2
	chr7	2281756	2281905	TRUE	6.26468e-54	1.35423e-56	0.77043	0.113107	105	31	7	3
	chr7	2281757	2281906	TRUE	6.26468e-54	1.35423e-56	0.77043	0.113107	105	31	7	3
	chr11	121163288	121163437	TRUE	6.26468e-54	1.32191e-56	0.896154	0.0811159	68	26	5	2
	chr13	97874474	97874623	TRUE	6.85823e-54	1.50107e-56	0.842029	0.0863405	75	23	6	3
	chr19	55677970	55678119	TRUE	7.10055e-54	1.5733e-56	0.881746	0.122156	78	21	7	3
	chr5	473032	473181	TRUE	7.18622e-54	1.6117e-56	0.933333	0.1057	67	30	4	2
	chr9	131266871	131267020	TRUE	7.37448e-54	1.67385e-56	0.837472	0.102463	106	28	7	3
	chr9	124922090	124922239	TRUE	1.29e-53	2.96287e-56	0.791151	0.148996	123	20	12	6
	chr6	28092287	28092436	TRUE	1.81179e-53	4.21029e-56	0.692473	0.0861475	93	31	5	3
	chr7	23145253	23145402	TRUE	2.41812e-53	5.68462e-56	0.806095	0.0910179	93	25	7	3
	chr9	136242922	136243071	TRUE	2.45426e-53	5.8359e-56	0.962192	0.187619	96	29	6	3
	chr7	116502463	116502612	TRUE	4.25332e-53	1.02287e-55	0.85641	0.163057	114	26	8	4
	chr9	128024011	128024160	TRUE	7.20208e-53	1.75148e-55	0.878788	0.125883	86	33	6	2
	chr9	115774424	115774573	TRUE	8.36923e-53	2.05793e-55	0.668669	0.0909355	116	22	10	5
	chr17	49124191	49124340	TRUE	1.09348e-52	2.71833e-55	0.8039	0.251364	196	25	15	7
	chr2	224467073	224467222	TRUE	2.12339e-52	5.33601e-55	0.795	0.136401	104	20	10	5
	chr12	124155591	124155740	TRUE	2.16219e-52	5.49196e-55	0.874074	0.115219	86	27	6	3
	chr17	56296618	56296767	TRUE	7.30634e-52	1.87555e-54	0.938272	0.142906	72	27	5	2
	chr7	72349836	72349985	TRUE	7.38705e-52	1.91623e-54	0.842	0.140869	101	25	7	4
	chr7	100888323	100888472	TRUE	8.10513e-52	2.1244e-54	0.859004	0.1818	108	29	7	3
	chr3	111393423	111393572	TRUE	8.54177e-52	2.26192e-54	0.95	0.10758	63	30	3	2
	chr7	148892477	148892626	TRUE	8.71166e-52	2.33045e-54	0.892857	0.130531	82	28	5	2
	chr5	68462813	68462962	TRUE	1.16699e-51	3.15335e-54	0.967391	0.166767	75	23	6	3
	chr7	43909097	43909246	TRUE	1.46472e-51	3.99741e-54	0.902174	0.139512	80	23	7	3
	chr4	8442404	8442553	TRUE	4.23976e-51	1.16855e-53	0.901235	0.108638	73	27	5	2
	chr9	134955205	134955354	TRUE	4.5893e-51	1.27729e-53	0.854	0.17219	108	25	8	4
	chr9	124922050	124922199	TRUE	5.16626e-51	1.45182e-53	0.661875	0.137289	139	27	10	5
	chr1	70686979	70687128	TRUE	1.03494e-50	2.93637e-53	0.665435	0.0868362	95	29	6	3
	chr3	39448104	39448253	TRUE	1.52047e-50	4.35501e-53	0.911815	0.0934643	70	14	7	5
	chr13	95248463	95248612	TRUE	1.57694e-50	4.55934e-53	0.740104	0.136786	116	32	7	3
	chr4	124286	124435	TRUE	1.67264e-50	4.88124e-53	0.86954	0.11471	74	29	5	2
	chr20	18477839	18477988	TRUE	2.38815e-50	7.03383e-53	0.974747	0.162853	75	33	4	2
	chr11	62473658	62473807	TRUE	2.44965e-50	7.28116e-53	0.949295	0.127134	73	27	5	2
	chr7	148787821	148787970	TRUE	2.51186e-50	7.53396e-53	0.883333	0.123459	86	30	5	2
	chr20	54967303	54967452	TRUE	3.78709e-50	1.14611e-52	0.754244	0.116883	105	23	9	4
	chr22	30162952	30163101	TRUE	3.83618e-50	1.17134e-52	0.86087	0.102984	76	23	6	3
	chr11	77850651	77850800	TRUE	4.52839e-50	1.39493e-52	0.826667	0.123991	82	25	6	3
	chr1	219347092	219347241	TRUE	6.16044e-50	1.91432e-52	0.834667	0.0747025	74	25	4	2
	chr12	104680627	104680776	TRUE	6.84185e-50	2.14455e-52	0.699234	0.142229	136	29	9	4
	chr10	73611034	73611183	TRUE	1.74228e-49	5.50818e-52	0.882716	0.126468	82	27	6	3
	chr12	22777976	22778125	TRUE	2.16556e-49	6.90488e-52	0.925926	0.141458	66	27	4	2
	chr4	113739139	113739288	TRUE	3.03951e-49	9.93788e-52	0.776389	0.103744	91	24	7	3
	chr9	140083009	140083158	TRUE	3.03951e-49	9.78363e-52	0.903333	0.143042	78	25	6	3
	chr17	61819167	61819316	TRUE	3.03951e-49	9.91567e-52	0.846952	0.13459	84	25	6	3
	chr15	41624792	41624941	TRUE	4.20648e-49	1.3867e-51	0.972222	0.130107	63	18	5	3
	chr4	6717742	6717891	TRUE	6.11802e-49	2.03339e-51	0.837238	0.123395	88	25	7	3
	chr7	16685350	16685499	TRUE	6.14505e-49	2.05898e-51	0.876925	0.223602	119	27	8	4
	chr4	124302	124451	TRUE	8.5251e-49	2.87948e-51	0.864881	0.118403	73	28	5	2
	chr3	16306438	16306587	TRUE	9.05834e-49	3.08407e-51	0.934028	0.0841171	58	24	4	2
	chr5	148737509	148737658	TRUE	1.22728e-48	4.21165e-51	0.869913	0.158117	94	33	5	2
	chr9	108320311	108320460	TRUE	1.29771e-48	4.48841e-51	0.690043	0.119942	119	33	7	3
	chr7	66460540	66460689	TRUE	1.40426e-48	4.89486e-51	0.736017	0.192643	137	23	12	5
	chr3	45730654	45730803	TRUE	1.40651e-48	4.94072e-51	0.878114	0.151651	96	26	8	3
	chr7	129691185	129691334	TRUE	1.73686e-48	6.14808e-51	0.727626	0.131102	123	19	13	6
	chr7	76178558	76178707	TRUE	2.06519e-48	7.36612e-51	0.88	0.131679	86	25	7	3
	chr10	74451789	74451938	TRUE	2.12467e-48	7.63567e-51	1	0.122681	55	22	5	2
	chr10	123687498	123687647	TRUE	2.18174e-48	7.89974e-51	0.940476	0.144351	75	28	3	2
	chr7	2281785	2281934	TRUE	2.98745e-48	1.08978e-50	0.87197	0.120908	75	22	7	3
	chr7	128502798	128502947	TRUE	3.29902e-48	1.21235e-50	0.730041	0.177948	160	27	12	5
	chr14	90722794	90722943	TRUE	5.07094e-48	1.87721e-50	0.672161	0.0810399	93	26	7	3
	chr13	24844825	24844974	TRUE	5.0746e-48	1.89228e-50	0.723718	0.113578	111	26	8	4
	chr11	118938393	118938542	TRUE	5.95744e-48	2.23758e-50	0.853448	0.12599	76	29	5	2
	chr7	131012487	131012636	TRUE	7.62421e-48	2.88421e-50	0.859158	0.117359	83	26	5	3
	chr7	32529929	32530078	TRUE	8.61013e-48	3.28045e-50	0.556604	0.117079	201	28	14	7
	chr21	40928269	40928418	TRUE	1.0326e-47	3.96211e-50	0.585429	0.110486	148	25	12	5
	chr12	10766135	10766284	TRUE	1.29522e-47	5.00476e-50	0.784864	0.103625	94	21	8	4
	chr1	55230139	55230288	TRUE	1.33622e-47	5.1993e-50	0.848214	0.12011	74	28	4	2
	chr19	35417707	35417856	TRUE	1.41681e-47	5.55116e-50	0.830108	0.0740319	73	31	4	2
	chr7	6616999	6617148	TRUE	1.47512e-47	5.81947e-50	0.661987	0.117689	131	29	9	4
	chr7	92861553	92861702	TRUE	2.75112e-47	1.09278e-49	0.877469	0.147331	89	18	9	4
	chr4	128554020	128554169	TRUE	2.96515e-47	1.1858e-49	0.749896	0.120445	85	23	6	3
	chr20	23402033	23402182	TRUE	3.39051e-47	1.36507e-49	0.904321	0.110347	65	27	5	2
	chr1	202858215	202858364	TRUE	4.0389e-47	1.63704e-49	0.882476	0.181637	107	25	7	4
	chr1	153643431	153643580	TRUE	4.44833e-47	1.81501e-49	0.873148	0.141447	79	18	8	4
	chr6	37467652	37467801	TRUE	6.06254e-47	2.49002e-49	0.920911	0.115346	68	23	5	2
	chr1	200379118	200379267	TRUE	9.39349e-47	3.8835e-49	0.796003	0.183179	113	28	8	4
	chr7	89975890	89976039	TRUE	9.89188e-47	4.16562e-49	0.811676	0.139276	115	26	8	4
	chr9	33025062	33025211	TRUE	9.89188e-47	4.16973e-49	0.855556	0.0934624	73	27	5	2
	chr20	43150678	43150827	TRUE	9.89188e-47	4.16967e-49	0.804176	0.132622	86	21	8	4
	chr21	34914368	34914517	TRUE	1.20095e-46	5.09484e-49	0.865217	0.121149	77	23	6	3
	chr15	41624771	41624920	TRUE	1.23187e-46	5.2593e-49	0.921053	0.127981	62	19	5	3
	chr5	112073456	112073605	TRUE	1.91518e-46	8.22833e-49	0.873333	0.137622	73	25	5	2
	chr7	65215863	65216012	TRUE	2.00276e-46	8.65871e-49	0.895161	0.12175	69	31	4	2
	chr15	29561969	29562118	TRUE	2.21693e-46	9.64455e-49	0.801111	0.170057	114	30	7	3
	chr1	235530628	235530777	TRUE	2.28006e-46	9.98082e-49	0.866667	0.158858	93	29	6	3
	chr12	48099726	48099875	TRUE	2.60812e-46	1.14874e-48	0.834848	0.166121	95	22	8	4
	chr19	12917306	12917455	TRUE	2.91767e-46	1.29296e-48	0.855	0.145209	87	30	5	2
	chr11	125773057	125773206	TRUE	4.08554e-46	1.82154e-48	0.866667	0.115367	65	19	6	3
	chr21	30445908	30446057	TRUE	4.2221e-46	1.89383e-48	0.829762	0.150663	98	28	7	3
	chr9	132597524	132597673	TRUE	4.31508e-46	1.94719e-48	0.754902	0.118554	83	34	5	2
	chr14	23398613	23398762	TRUE	5.52731e-46	2.50916e-48	0.954545	0.10814	52	22	4	2
	chr4	39460520	39460669	TRUE	6.02176e-46	2.74989e-48	0.82619	0.124705	79	21	7	3
	chr12	51441984	51442133	TRUE	7.53858e-46	3.46292e-48	0.902381	0.132168	62	14	7	4
	chr3	141456951	141457100	TRUE	9.29322e-46	4.29404e-48	0.868687	0.120878	70	33	4	2
	chr7	129251455	129251604	TRUE	9.49205e-46	4.41156e-48	0.745798	0.127834	96	34	5	2
	chr7	76829102	76829251	TRUE	1.09229e-45	5.10609e-48	0.486143	0.0806228	211	29	14	7
	chr8	11141900	11142049	TRUE	1.18077e-45	5.5516e-48	0.95	0.10321	53	20	4	2
	chr22	24181153	24181302	TRUE	1.39738e-45	6.60782e-48	0.662865	0.150068	124	31	8	4
	chr12	88429168	88429317	TRUE	1.97792e-45	9.40646e-48	0.759615	0.110829	69	26	5	2
	chr1	161195733	161195882	TRUE	2.09121e-45	1.00017e-47	0.984	0.191661	72	25	5	2
	chr5	65439985	65440134	TRUE	3.06125e-45	1.47239e-47	0.875	0.16251	82	28	6	2
	chr1	66458290	66458439	TRUE	3.47481e-45	1.68069e-47	0.563233	0.101127	169	26	12	6
	chr1	119683247	119683396	TRUE	3.83608e-45	1.8658e-47	0.95679	0.232208	84	27	5	3
	chr8	48173442	48173591	TRUE	4.00891e-45	1.96069e-47	0.816176	0.154605	92	34	5	2
	chr7	103848415	103848564	TRUE	4.03533e-45	1.98452e-47	0.872989	0.132021	78	29	5	2
	chr1	41174938	41175087	TRUE	5.37504e-45	2.65789e-47	0.679636	0.13682	130	22	11	5
	chr7	72299980	72300129	TRUE	7.45917e-45	3.70862e-47	0.860406	0.301784	163	27	12	6
	chr4	39699564	39699713	TRUE	8.08137e-45	4.03981e-47	0.918981	0.138524	69	36	3	1
	chr1	179846886	179847035	TRUE	1.20658e-44	6.0642e-47	0.954545	0.111444	56	22	4	2
	chr9	136344170	136344319	TRUE	1.44645e-44	7.30888e-47	0.862745	0.180877	88	34	5	2
	chr16	8814473	8814622	TRUE	1.68913e-44	8.58075e-47	0.786617	0.173227	114	29	8	3
	chr16	68344800	68344949	TRUE	1.85905e-44	9.49418e-47	0.977564	0.156317	63	26	4	2
	chr22	39077854	39078003	TRUE	2.15312e-44	1.10542e-46	0.895238	0.131569	71	30	4	2
	chr3	14220091	14220240	TRUE	2.38495e-44	1.23733e-46	0.878986	0.155597	79	23	7	3
	chr19	39322449	39322598	TRUE	2.38495e-44	1.23366e-46	0.905333	0.135873	72	25	5	2
	chr7	73097798	73097947	TRUE	3.31752e-44	1.73011e-46	0.840476	0.155639	91	21	8	4
	chr4	108910840	108910989	TRUE	3.43343e-44	1.79984e-46	0.95679	0.104641	54	27	3	2
	chr9	127420591	127420740	TRUE	3.50097e-44	1.84471e-46	0.540199	0.137313	176	21	16	8
	chr3	48647050	48647199	TRUE	3.99907e-44	2.11797e-46	0.758333	0.122357	104	30	7	3
	chr7	139876693	139876842	TRUE	4.29336e-44	2.28543e-46	0.839702	0.29369	158	40	8	3
	chr7	5862691	5862840	TRUE	4.56179e-44	2.44064e-46	0.546703	0.12692	165	26	12	6
	chr7	92747274	92747423	TRUE	5.3191e-44	2.86019e-46	0.554029	0.0919923	167	12	28	13
	chr13	45563565	45563714	TRUE	5.51687e-44	2.98145e-46	0.802174	0.111765	82	23	7	3
	chr19	19030151	19030300	TRUE	5.91418e-44	3.21215e-46	0.890909	0.170555	80	22	7	3
	chr1	109756440	109756589	TRUE	5.95697e-44	3.25148e-46	0.775287	0.105939	87	29	6	3
	chr2	85839104	85839253	TRUE	6.42276e-44	3.52307e-46	0.812821	0.102721	81	26	6	3
	chr11	65729060	65729209	TRUE	7.65732e-44	4.22096e-46	0.867816	0.119489	75	29	5	2
	chr1	145039894	145040043	TRUE	7.9361e-44	4.39608e-46	0.702007	0.154932	135	35	8	3
	chr7	32982734	32982883	TRUE	8.1079e-44	4.51315e-46	0.77381	0.178922	99	35	5	2
	chr9	130213692	130213841	TRUE	9.23923e-44	5.16786e-46	0.810935	0.170668	112	27	8	4
	chr19	58816640	58816789	TRUE	9.97442e-44	5.60603e-46	0.951149	0.149943	68	29	5	2
	chr9	133569058	133569207	TRUE	1.02076e-43	5.76465e-46	0.839938	0.173123	107	26	8	4
	chr22	39077777	39077926	TRUE	1.09583e-43	6.21825e-46	0.72037	0.105294	93	36	5	2
	chr1	193155676	193155825	TRUE	1.14201e-43	6.51115e-46	0.649321	0.169862	192	24	16	8
	chr17	57970248	57970397	TRUE	1.24329e-43	7.12219e-46	0.876812	0.147571	76	23	6	3
	chr17	77924608	77924757	TRUE	1.27231e-43	7.32279e-46	0.815018	0.223395	114	26	9	4
	chr22	29137774	29137923	TRUE	1.29329e-43	7.47852e-46	0.931609	0.148672	72	29	5	2
	chr7	64023436	64023585	TRUE	1.37096e-43	7.96465e-46	0.769082	0.152537	106	23	9	4
	chr7	47867018	47867167	TRUE	1.40506e-43	8.20071e-46	0.585341	0.130895	178	26	14	6
	chr20	33735095	33735244	TRUE	1.44087e-43	8.44866e-46	0.821839	0.124671	76	29	5	2
	chr1	193155692	193155841	TRUE	1.93877e-43	1.14691e-45	0.649321	0.170768	192	24	16	8
	chr7	35840527	35840676	TRUE	1.93877e-43	1.1473e-45	0.841304	0.223822	116	23	10	5
	chr19	39109622	39109771	TRUE	2.17741e-43	1.2944e-45	0.797024	0.124968	92	28	6	3
	chr22	30162921	30163070	TRUE	2.24805e-43	1.34247e-45	0.80303	0.100808	73	22	6	3
	chr12	32654994	32655143	TRUE	2.51923e-43	1.51121e-45	0.920513	0.153918	66	13	8	5
	chr22	26908403	26908552	TRUE	2.60674e-43	1.57075e-45	0.790123	0.120904	69	27	4	2
	chr7	6616984	6617133	TRUE	2.62934e-43	1.59147e-45	0.635806	0.116199	123	26	9	4
	chr7	97736097	97736246	TRUE	2.89543e-43	1.76035e-45	0.66369	0.0875027	115	30	7	3
	chr4	24586136	24586285	TRUE	2.94561e-43	1.79882e-45	0.90641	0.202906	87	26	6	3
	chr11	82904633	82904782	TRUE	3.75605e-43	2.30389e-45	0.892708	0.100869	62	16	8	3
	chr4	124317856	124318005	TRUE	4.69847e-43	2.90454e-45	0.770119	0.0897641	81	20	8	4
	chr8	94766993	94767142	TRUE	4.69847e-43	2.90734e-45	0.819333	0.134869	98	25	7	3
	chr1	70671227	70671376	TRUE	4.87504e-43	3.02978e-45	0.888596	0.104993	57	19	5	3
	chr5	172410663	172410812	TRUE	6.00737e-43	3.74974e-45	0.83908	0.151364	88	29	6	3
	chr3	128598233	128598382	TRUE	6.53024e-43	4.09375e-45	0.873118	0.163249	81	31	4	2
	chr5	68530522	68530671	TRUE	6.95713e-43	4.38017e-45	0.789881	0.0827171	59	20	5	2
	chr10	35484730	35484879	TRUE	8.10513e-43	5.12484e-45	0.719069	0.123898	106	19	11	5
	chr4	110736566	110736715	TRUE	8.13069e-43	5.16297e-45	0.746	0.116675	102	25	7	4
	chr16	11945394	11945543	TRUE	8.39055e-43	5.35066e-45	0.784432	0.134914	87	26	6	3
	chr14	77923856	77924005	TRUE	9.65678e-43	6.18422e-45	0.869697	0.132082	73	22	6	3
	chr2	26987042	26987191	TRUE	1.32607e-42	8.52799e-45	0.814103	0.0903503	57	26	4	2
	chr1	44870950	44871099	TRUE	1.42747e-42	9.21868e-45	0.734583	0.147955	117	40	5	2
	chr1	101491314	101491463	TRUE	1.48005e-42	9.59827e-45	0.809524	0.123073	78	35	4	2
	chr3	179322475	179322624	TRUE	1.51436e-42	9.86167e-45	0.926261	0.159091	73	17	7	4
	chr7	37025673	37025822	TRUE	1.72514e-42	1.12809e-44	0.55496	0.130264	161	18	17	8
	chr3	137906048	137906197	TRUE	1.74728e-42	1.14729e-44	0.803333	0.0789807	66	25	5	2
	chr1	222763207	222763356	TRUE	1.86111e-42	1.22706e-44	0.808772	0.0804332	68	19	7	3
	chr14	22901678	22901827	TRUE	1.86317e-42	1.23346e-44	0.802549	0.0876432	65	9	13	7
	chr7	150076306	150076455	TRUE	2.1373e-42	1.42071e-44	0.943333	0.21377	78	25	6	3
	chr1	101491309	101491458	TRUE	2.13892e-42	1.42757e-44	0.777778	0.121638	81	36	4	2
	chr7	63774292	63774441	TRUE	2.21405e-42	1.48369e-44	0.842361	0.147336	88	16	11	5
	chr20	32950962	32951111	TRUE	2.5899e-42	1.74256e-44	0.804054	0.111325	71	37	3	1
	chr3	48481586	48481735	TRUE	2.72695e-42	1.84213e-44	0.944444	0.148253	61	20	5	3
	chr9	132565332	132565481	TRUE	2.86458e-42	1.94285e-44	0.922718	0.142805	73	24	6	3
	chr19	46220591	46220740	TRUE	3.79881e-42	2.58674e-44	0.953704	0.149131	61	27	4	2
	chr6	21593872	21594021	TRUE	3.98576e-42	2.72481e-44	0.632095	0.155201	129	25	10	5
	chr19	36103546	36103695	TRUE	5.33275e-42	3.66007e-44	0.695055	0.129401	100	26	7	3
	chr6	136172734	136172883	TRUE	5.347e-42	3.6843e-44	0.844203	0.118987	65	23	3	2
	chr19	36236288	36236437	TRUE	6.79485e-42	4.70028e-44	0.915079	0.205369	83	21	7	3
	chr10	93169996	93170145	TRUE	6.82841e-42	4.74195e-44	0.984375	0.146808	55	32	3	1
	chr5	137878884	137879033	TRUE	7.29457e-42	5.08539e-44	0.978395	0.173394	63	27	4	2
	chr7	42971902	42972051	TRUE	7.44775e-42	5.2123e-44	0.734647	0.203044	157	29	11	5
	chr7	90032696	90032845	TRUE	7.62402e-42	5.35626e-44	0.727408	0.115911	110	21	9	5
	chr14	39583388	39583537	TRUE	9.3336e-42	6.58255e-44	0.575916	0.0892021	108	26	8	4
	chr15	41047399	41047548	TRUE	1.07111e-41	7.58297e-44	0.970238	0.0898116	46	28	3	1
	chr10	68685692	68685841	TRUE	1.56656e-41	1.11329e-43	0.728	0.0802629	87	25	7	3
	chr8	125462948	125463097	TRUE	1.67607e-41	1.19564e-43	0.650753	0.125018	119	29	8	4
	chr11	33757977	33758126	TRUE	2.10963e-41	1.51062e-43	0.91092	0.161589	72	29	5	2
	chr20	44462370	44462519	TRUE	2.25886e-41	1.62358e-43	0.865196	0.109291	62	34	3	1
	chr1	161337616	161337765	TRUE	2.27542e-41	1.64164e-43	0.585281	0.0878895	127	22	11	5
	chr7	92157797	92157946	TRUE	3.95963e-41	2.86744e-43	0.901656	0.17094	76	23	6	3
	chr7	99698332	99698481	TRUE	4.01424e-41	2.91783e-43	0.863492	0.151973	65	21	5	3
	chr2	61372166	61372315	TRUE	4.10567e-41	2.99538e-43	0.815212	0.128992	74	18	9	4
	chr12	56862201	56862350	TRUE	7.13313e-41	5.2234e-43	0.920833	0.162778	67	24	5	2
	chr7	23338840	23338989	TRUE	9.9748e-41	7.33124e-43	0.795833	0.126585	82	24	6	3
	chr10	8095364	8095513	TRUE	1.07414e-40	7.92373e-43	0.922917	0.229923	87	32	5	2
	chr14	51706786	51706935	TRUE	1.22034e-40	9.03518e-43	0.811995	0.117704	76	16	9	4
	chr7	6048689	6048838	TRUE	1.22392e-40	9.09472e-43	0.881481	0.147603	72	18	8	4
	chr8	107282373	107282522	TRUE	1.29996e-40	9.69492e-43	0.780263	0.193012	106	38	5	2
	chr22	41601213	41601362	TRUE	1.43304e-40	1.07261e-42	0.972222	0.151803	57	21	4	2
	chr11	46638729	46638878	TRUE	1.44765e-40	1.08746e-42	0.781111	0.120339	73	30	5	2
	chr15	55489183	55489332	TRUE	1.88996e-40	1.42483e-42	0.888333	0.118244	63	20	5	3
	chr3	147657692	147657841	TRUE	1.91387e-40	1.44802e-42	0.673485	0.0934063	90	22	8	4
	chr12	72079778	72079927	TRUE	2.09734e-40	1.5925e-42	0.655952	0.088834	112	40	5	2
	chr10	124913770	124913919	TRUE	2.99758e-40	2.28415e-42	0.844697	0.159704	70	22	6	3
	chr3	49449380	49449529	TRUE	3.97148e-40	3.03699e-42	0.855333	0.150345	74	25	5	2
	chr6	28317591	28317740	TRUE	4.5057e-40	3.45768e-42	0.598551	0.0837163	104	23	9	4
	chr7	2281796	2281945	TRUE	4.62394e-40	3.56091e-42	0.82619	0.124355	77	21	7	3
	chr3	185655160	185655309	TRUE	4.81985e-40	3.72481e-42	0.941667	0.147538	58	30	3	1
	chr7	92157987	92158136	TRUE	4.92471e-40	3.81915e-42	0.894444	0.257428	98	17	11	5
	chr10	58120986	58121135	TRUE	5.28683e-40	4.11426e-42	0.851852	0.138528	73	18	7	4
	chr14	50234687	50234836	TRUE	5.85838e-40	4.57488e-42	0.932353	0.196989	78	34	5	2
	chr14	24711832	24711981	TRUE	5.98656e-40	4.69116e-42	0.843011	0.17248	79	31	5	2
	chr7	75677293	75677442	TRUE	6.01333e-40	4.72838e-42	0.874851	0.164566	75	16	9	4
	chr18	268011	268160	TRUE	6.38163e-40	5.03522e-42	0.802564	0.135106	85	26	6	3
	chr6	31830661	31830810	TRUE	8.73403e-40	6.91491e-42	0.975	0.125602	51	16	6	3
	chr4	128703353	128703502	TRUE	9.10456e-40	7.23287e-42	0.942308	0.127756	56	26	4	2
	chr14	54863626	54863775	TRUE	9.80191e-40	7.81335e-42	0.920139	0.146338	62	24	5	2
	chr2	198380671	198380820	TRUE	1.04253e-39	8.3384e-42	1	0.139376	48	24	3	2
	chr2	64455502	64455651	TRUE	1.19867e-39	9.61967e-42	0.914881	0.165906	77	28	4	2
	chr16	72127466	72127615	TRUE	1.21644e-39	9.79513e-42	0.850926	0.131791	69	18	7	3
	chr14	32798423	32798572	TRUE	1.31067e-39	1.05893e-41	0.532407	0.0809067	141	27	10	5
	chr7	27135643	27135792	TRUE	1.5047e-39	1.21976e-41	0.848344	0.14212	97	23	8	4
	chr17	73452564	73452713	TRUE	1.51618e-39	1.23317e-41	0.989583	0.162789	55	24	4	2
	chr5	141303309	141303458	TRUE	1.61234e-39	1.31574e-41	0.919355	0.123231	59	31	4	1
	chr10	56561003	56561152	TRUE	1.61862e-39	1.32524e-41	0.638218	0.170092	152	29	10	5
	chr5	138609692	138609841	TRUE	1.64571e-39	1.35186e-41	0.734487	0.168095	110	32	6	3
	chr1	170501170	170501319	TRUE	1.8049e-39	1.48808e-41	0.806111	0.11606	81	30	5	2
	chr13	32889517	32889666	TRUE	1.8049e-39	1.49238e-41	0.839506	0.110628	62	27	4	2
	chr16	68344845	68344994	TRUE	1.85426e-39	1.5382e-41	0.985507	0.174312	57	23	4	2
	chr12	109915358	109915507	TRUE	1.95561e-39	1.62756e-41	0.854545	0.154458	74	22	6	3
	chr10	91461267	91461416	TRUE	2.14306e-39	1.78936e-41	0.91369	0.20528	79	28	5	2
	chr1	223101683	223101832	TRUE	2.25308e-39	1.88731e-41	0.673619	0.115408	89	25	7	3
	chr6	27806069	27806218	TRUE	2.95706e-39	2.48499e-41	0.775759	0.180398	104	23	9	4
	chr17	1359496	1359645	TRUE	3.07661e-39	2.59377e-41	0.904167	0.186246	79	28	5	2
	chr3	27410864	27411013	TRUE	3.22407e-39	2.7268e-41	0.854167	0.111172	52	24	3	2
	chr19	21541694	21541843	TRUE	3.305e-39	2.80418e-41	0.786508	0.115007	70	21	6	3
	chr22	41864660	41864809	TRUE	3.46105e-39	2.94593e-41	0.764484	0.12219	84	18	9	4
	chr17	27169793	27169942	TRUE	3.49634e-39	2.98541e-41	0.864762	0.147831	78	20	6	3
	chr9	140484889	140485038	TRUE	3.6006e-39	3.08417e-41	1	0.143227	48	23	3	2
	chr9	104160871	104161020	TRUE	3.72248e-39	3.19863e-41	0.832292	0.139057	85	24	7	3
	chr7	65540676	65540825	TRUE	3.73912e-39	3.22303e-41	0.926667	0.154924	63	25	5	2
	chr6	27860915	27861064	TRUE	4.11468e-39	3.55788e-41	0.667956	0.120249	103	24	8	4
	chr17	37010005	37010154	TRUE	4.51999e-39	3.92055e-41	0.704108	0.130097	86	17	10	5
	chr12	21654481	21654630	TRUE	4.58075e-39	3.98563e-41	0.866071	0.121259	62	16	8	3
	chr2	109335837	109335986	TRUE	5.3863e-39	4.70108e-41	0.774306	0.102785	65	24	4	2
	chr1	165738087	165738236	TRUE	5.48007e-39	4.79772e-41	0.965909	0.0829517	44	11	5	4
	chr10	69425368	69425517	TRUE	5.70689e-39	5.01172e-41	0.588023	0.109684	131	22	11	5
	chr12	95611192	95611341	TRUE	6.64976e-39	5.85771e-41	0.947619	0.165484	60	35	3	1
	chr2	29117433	29117582	TRUE	6.8546e-39	6.05667e-41	0.883333	0.128115	55	30	3	1
	chr12	69080535	69080684	TRUE	6.90367e-39	6.11868e-41	0.703086	0.112639	81	27	6	3
	chr7	77428009	77428158	TRUE	7.36229e-39	6.54506e-41	0.901764	0.211612	82	27	5	3
	chr20	5100599	5100748	TRUE	8.16414e-39	7.27996e-41	0.913194	0.249884	83	24	6	3
	chr12	11324165	11324314	TRUE	8.30789e-39	7.43059e-41	0.778611	0.17438	90	30	6	3
	chr7	100025906	100026055	TRUE	1.01541e-38	9.10928e-41	0.632576	0.130303	104	16	13	6
	chr5	132073217	132073366	TRUE	1.09618e-38	9.8635e-41	0.864198	0.141756	72	27	5	2
	chr11	75110462	75110611	TRUE	1.1266e-38	1.01676e-40	0.74623	0.137112	96	24	7	4
	chr17	30677057	30677206	TRUE	1.14702e-38	1.03829e-40	0.904167	0.123422	58	16	7	3
	chr20	18488088	18488237	TRUE	1.31348e-38	1.19252e-40	0.769231	0.158218	93	26	7	3
	chr3	49066827	49066976	TRUE	1.57759e-38	1.43658e-40	0.87	0.119659	61	25	5	2
	chr5	159846120	159846269	TRUE	1.58376e-38	1.44647e-40	0.817391	0.118471	70	23	6	3
	chr2	29093117	29093266	TRUE	1.64133e-38	1.50349e-40	0.945333	0.160838	61	25	4	2
	chr7	64363531	64363680	TRUE	1.66685e-38	1.53137e-40	0.587496	0.101053	114	22	11	5
	chr1	150293828	150293977	TRUE	1.67905e-38	1.54712e-40	0.746795	0.0980566	65	26	5	2
	chr19	48759102	48759251	TRUE	1.69017e-38	1.56193e-40	0.738095	0.104021	83	11	14	7
	chr7	73097733	73097882	TRUE	1.7942e-38	1.66291e-40	0.733107	0.138122	96	21	9	4
	chr1	16693483	16693632	TRUE	1.81163e-38	1.68396e-40	0.799132	0.156091	79	16	9	4
	chr8	145597631	145597780	TRUE	2.00522e-38	1.86933e-40	0.988506	0.143191	50	29	3	1
	chr1	110577141	110577290	TRUE	2.01186e-38	1.88096e-40	0.8	0.111783	70	25	5	2
	chr15	62352599	62352748	TRUE	2.13861e-38	2.0068e-40	0.891176	0.23321	96	34	5	2
	chr20	43104447	43104596	TRUE	2.13861e-38	2.01102e-40	0.954545	0.118319	48	22	4	2
	chr20	30697209	30697358	TRUE	2.37603e-38	2.24069e-40	0.848333	0.0818646	47	20	4	2
	chr11	14521350	14521499	TRUE	2.38363e-38	2.2543e-40	0.86859	0.160881	78	26	5	3
	chr19	16606955	16607104	TRUE	2.50725e-38	2.37799e-40	0.971795	0.140509	52	13	7	4
	chr1	156252572	156252721	TRUE	2.55934e-38	2.4343e-40	0.847778	0.170461	94	30	6	3
	chr15	75182310	75182459	TRUE	2.62341e-38	2.50233e-40	0.888889	0.130164	61	24	5	2
	chr1	150601561	150601710	TRUE	2.7761e-38	2.65547e-40	0.854762	0.0946728	57	14	8	4
	chr7	75677273	75677422	TRUE	3.03287e-38	2.90928e-40	0.856101	0.161796	74	16	8	4
	chr20	18774586	18774735	TRUE	3.41023e-38	3.28049e-40	0.803125	0.0793133	60	16	7	3
	chr22	26908389	26908538	TRUE	3.50355e-38	3.37972e-40	0.741333	0.120305	70	25	5	2
	chr18	21017877	21018026	TRUE	3.85703e-38	3.73113e-40	0.788542	0.138451	99	32	6	3
	chr15	101835412	101835561	TRUE	3.96158e-38	3.84297e-40	0.796552	0.143851	83	29	5	2
	chr11	108338210	108338359	TRUE	4.32697e-38	4.20912e-40	0.910819	0.160756	65	19	6	3
	chr21	15399642	15399791	TRUE	4.46243e-38	4.35295e-40	0.796377	0.119628	75	23	6	3
	chr1	43855435	43855584	TRUE	4.49505e-38	4.39691e-40	0.764286	0.114377	87	21	7	4
	chr7	27779638	27779787	TRUE	4.55438e-38	4.46725e-40	0.921053	0.1561	64	19	7	3
	chr7	99686483	99686632	TRUE	4.55743e-38	4.48256e-40	0.746032	0.134127	75	21	7	3
	chr1	169396622	169396771	TRUE	4.78733e-38	4.72162e-40	0.729622	0.111853	83	17	7	4
	chr9	131038220	131038369	TRUE	5.28124e-38	5.22301e-40	0.734091	0.12433	83	22	8	3
	chr14	102829205	102829354	TRUE	5.34389e-38	5.29942e-40	0.890972	0.146427	76	24	5	3
	chr12	109915339	109915488	TRUE	6.1819e-38	6.14715e-40	0.82803	0.15489	74	22	6	3
	chr12	25403806	25403955	TRUE	6.4675e-38	6.44862e-40	0.920139	0.141754	65	24	3	2
	chr19	58280925	58281074	TRUE	7.55014e-38	7.54851e-40	0.813218	0.11368	68	29	4	2
	chr7	16793251	16793400	TRUE	7.69231e-38	7.71144e-40	0.735397	0.11626	100	30	6	3
	chr3	52029910	52030059	TRUE	7.96016e-38	8.00146e-40	0.793333	0.128972	84	25	6	3
	chr21	46359855	46360004	TRUE	9.33814e-38	9.41182e-40	0.858333	0.147374	66	20	5	3
	chr1	50575413	50575562	TRUE	9.6017e-38	9.7034e-40	0.75877	0.0851774	69	20	7	3
	chr15	90792664	90792813	TRUE	1.02416e-37	1.03778e-39	0.814516	0.128602	75	31	4	2
	chr13	34392106	34392255	TRUE	1.08563e-37	1.103e-39	0.808824	0.0784635	56	17	7	3
	chr7	99746430	99746579	TRUE	1.1408e-37	1.16213e-39	0.774713	0.140187	85	29	6	2
	chr6	165723063	165723212	TRUE	1.23839e-37	1.26489e-39	0.796473	0.158041	104	27	8	3
	chr13	41768654	41768803	TRUE	1.52091e-37	1.55757e-39	0.758	0.186017	95	25	7	3
	chr1	165738072	165738221	TRUE	1.54388e-37	1.58526e-39	0.958929	0.0801346	42	10	5	4
	chr8	94766972	94767121	TRUE	1.57325e-37	1.61968e-39	0.812879	0.13525	87	22	7	3
	chr14	77923896	77924045	TRUE	1.71922e-37	1.77459e-39	0.871429	0.153236	71	21	6	3
	chr1	40506155	40506304	TRUE	1.95206e-37	2.02021e-39	0.973485	0.202208	65	22	6	2
	chr8	67940738	67940887	TRUE	2.12358e-37	2.20346e-39	0.822807	0.0967423	51	19	5	2
	chr21	45079332	45079481	TRUE	2.57035e-37	2.67397e-39	0.8125	0.14549	71	32	4	2
	chr11	108093317	108093466	TRUE	2.62628e-37	2.73926e-39	0.858333	0.122852	64	22	6	2
	chr2	74734773	74734922	TRUE	2.66557e-37	2.78744e-39	0.865833	0.171858	77	20	7	3
	chr9	71394864	71395013	TRUE	2.93909e-37	3.08141e-39	0.761111	0.110473	80	30	5	2
	chr16	48278111	48278260	TRUE	3.09171e-37	3.24977e-39	0.669333	0.0659509	72	25	5	2
	chr7	77325643	77325792	TRUE	3.19482e-37	3.36678e-39	0.71627	0.151327	78	24	6	3
	chr11	57529169	57529318	TRUE	3.30124e-37	3.48786e-39	0.68381	0.124965	97	20	9	4
	chr1	81771745	81771894	TRUE	3.4559e-37	3.66059e-39	0.674786	0.0915138	87	13	14	6
	chr5	148737534	148737683	TRUE	3.87602e-37	4.11607e-39	0.806905	0.169079	88	30	5	2
	chr9	130497556	130497705	TRUE	3.88707e-37	4.13831e-39	0.749343	0.193318	108	29	6	3
	chr15	62352638	62352787	TRUE	5.19303e-37	5.54271e-39	0.907071	0.249131	85	33	5	2
	chr11	62473739	62473888	TRUE	5.74368e-37	6.14597e-39	0.910606	0.156683	69	22	5	3
	chr2	62132703	62132852	TRUE	5.75158e-37	6.16996e-39	0.853763	0.125348	75	31	5	2
	chr15	41624826	41624975	TRUE	6.47247e-37	6.96078e-39	0.966667	0.144768	51	15	6	3
	chr14	61201370	61201519	TRUE	7.72231e-37	8.32577e-39	0.661611	0.0828283	104	23	9	4
	chr9	135230324	135230473	TRUE	8.08042e-37	8.7337e-39	0.85049	0.122483	67	34	3	1
	chr3	112709700	112709849	TRUE	8.20476e-37	8.89026e-39	0.716667	0.108813	79	18	8	4
	chr17	38444046	38444195	TRUE	8.32303e-37	9.04091e-39	0.858621	0.174787	79	29	5	2
	chr11	117198471	117198620	TRUE	8.3443e-37	9.08655e-39	0.755333	0.14097	84	25	7	3
	chr2	208576164	208576313	TRUE	9.88652e-37	1.07927e-38	0.952381	0.159994	56	28	4	2
	chr3	69129476	69129625	TRUE	1.00284e-36	1.09746e-38	0.902174	0.140216	59	23	4	2
	chr13	111893392	111893541	TRUE	1.03971e-36	1.14063e-38	0.723182	0.136922	108	31	7	3
	chr7	72299986	72300135	TRUE	1.11373e-36	1.22484e-38	0.806085	0.307754	160	27	12	5
	chr16	56485213	56485362	TRUE	1.1161e-36	1.23046e-38	0.934722	0.146394	58	24	4	2
	chr20	3154144	3154293	TRUE	1.15119e-36	1.27225e-38	0.707265	0.149358	100	39	4	2
	chr7	56174139	56174288	TRUE	1.27548e-36	1.41307e-38	0.764146	0.150276	75	17	10	4
	chr13	45563587	45563736	TRUE	1.41653e-36	1.57316e-38	0.7825	0.119245	73	20	7	3
	chr10	27531011	27531160	TRUE	1.50057e-36	1.67203e-38	0.922549	0.203399	74	17	7	4
	chr22	35796016	35796165	TRUE	1.50057e-36	1.6746e-38	0.952381	0.192217	59	21	6	2
	chr19	10216865	10217014	TRUE	1.56932e-36	1.75556e-38	0.916667	0.126715	54	24	4	2
	chr7	76178577	76178726	TRUE	1.57041e-36	1.76102e-38	0.815972	0.141622	82	24	7	3
	chr4	8160511	8160660	TRUE	1.6743e-36	1.88205e-38	0.856322	0.146145	62	29	4	2
	chr5	96518896	96519045	TRUE	1.77122e-36	1.99578e-38	0.678778	0.0993712	90	23	7	3
	chr21	35288110	35288259	TRUE	1.77647e-36	2.0065e-38	0.840741	0.130349	72	18	8	4
	chr6	43445211	43445360	TRUE	1.84688e-36	2.09333e-38	0.88	0.106757	52	20	4	2
	chr19	20011687	20011836	TRUE	1.84688e-36	2.09601e-38	0.68	0.139186	90	25	7	3
	chr7	64363520	64363669	TRUE	1.87981e-36	2.13845e-38	0.622912	0.101053	98	20	11	4
	chr7	141438076	141438225	TRUE	1.93156e-36	2.20254e-38	0.77381	0.163666	93	23	7	4
	chr10	99894281	99894430	TRUE	1.96732e-36	2.24864e-38	0.82197	0.100453	58	22	5	2
	chr17	40811268	40811417	TRUE	2.29579e-36	2.63028e-38	0.785	0.0988834	71	30	4	2
	chr3	197686826	197686975	TRUE	2.29652e-36	2.63732e-38	0.650758	0.111464	95	22	8	4
	chr6	30539070	30539219	TRUE	2.30996e-36	2.659e-38	0.892857	0.138198	56	21	4	2
	chr16	57406314	57406463	TRUE	2.42796e-36	2.80139e-38	0.859896	0.190317	84	32	4	2
	chr7	5085352	5085501	TRUE	2.46631e-36	2.8523e-38	0.594533	0.105162	127	27	9	4
	chr19	45542198	45542347	TRUE	2.67948e-36	3.10608e-38	0.966667	0.149287	51	20	4	2
	chr12	124118199	124118348	TRUE	3.24539e-36	3.77085e-38	0.901515	0.102822	49	22	3	2
	chr7	140714733	140714882	TRUE	3.3757e-36	3.93139e-38	0.825	0.178536	85	26	6	3
	chr7	100271275	100271424	TRUE	3.43476e-36	4.00945e-38	0.741333	0.139552	81	25	5	3
	chr9	117349894	117350043	TRUE	3.62821e-36	4.24507e-38	0.762179	0.17432	110	26	8	4
	chr14	90421041	90421190	TRUE	3.72967e-36	4.37386e-38	0.87	0.207819	79	25	6	3
	chr14	23504061	23504210	TRUE	3.99848e-36	4.69989e-38	0.916667	0.124106	53	17	6	3
	chr21	40752170	40752319	TRUE	4.15587e-36	4.89613e-38	0.868353	0.139848	70	24	6	2
	chr1	156308233	156308382	TRUE	4.29048e-36	5.06631e-38	0.724713	0.173728	97	29	6	3
	chr21	45079326	45079475	TRUE	4.61282e-36	5.4594e-38	0.772727	0.145021	73	33	4	2
	chr7	104909429	104909578	TRUE	5.3105e-36	6.29947e-38	0.488142	0.0999512	181	17	21	10
	chr11	67250421	67250570	TRUE	5.37076e-36	6.38547e-38	0.844048	0.137371	73	28	5	2
	chr16	72127515	72127664	TRUE	5.65511e-36	6.73882e-38	0.857292	0.149119	66	16	8	4
	chr1	1655743	1655892	TRUE	5.92481e-36	7.07622e-38	0.784722	0.126712	74	18	8	4
	chr2	135809753	135809902	TRUE	6.7024e-36	8.02303e-38	0.760784	0.0966426	60	17	5	3
	chr17	55927351	55927500	TRUE	7.31645e-36	8.77784e-38	0.715714	0.121441	102	35	6	2
	chr7	93633642	93633791	TRUE	7.47413e-36	8.98722e-38	0.796368	0.116034	73	13	10	5
	chr15	55700526	55700675	TRUE	7.8137e-36	9.41664e-38	0.727315	0.176381	101	36	5	2
	chr4	89205840	89205989	TRUE	8.94149e-36	1.07999e-37	0.942308	0.213973	70	26	5	2
	chr19	38085677	38085826	TRUE	9.33641e-36	1.13022e-37	0.838596	0.133687	70	19	6	3
	chr4	147096781	147096930	TRUE	9.39158e-36	1.13943e-37	0.595833	0.0981475	125	32	8	3
	chr4	668074	668223	TRUE	9.44638e-36	1.14864e-37	0.762667	0.136022	83	25	6	3
	chr1	203764688	203764837	TRUE	9.89763e-36	1.20618e-37	0.875916	0.136403	63	26	4	2
	chr20	36661785	36661934	TRUE	1.05494e-35	1.28845e-37	0.947552	0.100573	48	13	9	3
	chr1	3566589	3566738	TRUE	1.05524e-35	1.29168e-37	0.913889	0.0869712	49	24	3	2
	chr15	82555056	82555205	TRUE	1.07238e-35	1.31555e-37	0.832143	0.117537	59	28	4	2
	chr17	79213005	79213154	TRUE	1.08675e-35	1.33612e-37	0.905797	0.162442	62	23	5	2
	chr4	186733344	186733493	TRUE	1.23845e-35	1.52597e-37	0.709985	0.264119	180	28	12	6
	chr9	140082954	140083103	TRUE	1.32192e-35	1.6324e-37	0.788194	0.142466	68	24	6	2
	chr6	33359213	33359362	TRUE	1.34469e-35	1.66415e-37	0.839683	0.156221	71	21	7	3
	chr7	149570883	149571032	TRUE	1.34759e-35	1.67138e-37	0.6475	0.196401	123	30	8	4
	chr7	75677250	75677399	TRUE	1.37503e-35	1.70913e-37	0.817507	0.156274	69	17	7	4
	chr8	101571964	101572113	TRUE	1.39206e-35	1.73406e-37	0.829167	0.156313	69	20	5	3
	chr3	10157233	10157382	TRUE	1.46554e-35	1.82955e-37	0.704321	0.104929	78	27	6	2
	chr17	79213011	79213160	TRUE	1.46832e-35	1.83699e-37	0.888889	0.162442	64	24	5	2
	chr9	94877642	94877791	TRUE	1.56051e-35	1.95654e-37	0.826087	0.133251	64	23	5	2
	chr19	5978065	5978214	TRUE	1.66142e-35	2.08755e-37	0.818	0.142586	79	25	6	3
	chr5	173043608	173043757	TRUE	1.66893e-35	2.10149e-37	0.910431	0.167018	67	21	6	3
	chr14	91526945	91527094	TRUE	1.85488e-35	2.34065e-37	0.977273	0.147516	47	22	3	2
	chr19	42817377	42817526	TRUE	1.86672e-35	2.36064e-37	0.623437	0.110768	122	32	8	3
	chr1	156182684	156182833	TRUE	1.89904e-35	2.40664e-37	0.922464	0.13378	54	23	4	2
	chr5	143550230	143550379	TRUE	1.91815e-35	2.43604e-37	0.934028	0.144436	56	24	4	2
	chr7	56119278	56119427	TRUE	2.07679e-35	2.64313e-37	0.874868	0.186919	71	18	6	3
	chr14	32030491	32030640	TRUE	2.16334e-35	2.76497e-37	0.631262	0.0675965	86	21	8	4
	chr19	10764472	10764621	TRUE	2.16334e-35	2.76386e-37	0.736667	0.145902	85	25	6	3
	chr4	153700829	153700978	TRUE	2.18992e-35	2.80485e-37	0.905556	0.15953	61	30	4	2
	chr16	56642411	56642560	TRUE	2.37902e-35	3.05918e-37	0.765385	0.157184	86	26	6	3
	chr19	49999534	49999683	TRUE	2.37902e-35	3.05991e-37	0.933107	0.215485	77	21	7	3
	chr22	51021346	51021495	TRUE	2.46261e-35	3.17408e-37	0.972222	0.229974	64	30	4	2
	chr19	1490362	1490511	TRUE	2.59397e-35	3.35041e-37	0.782576	0.137089	72	22	6	3
	chr4	76649729	76649878	TRUE	2.60076e-35	3.3662e-37	0.81092	0.158139	88	29	5	3
	chr7	44084139	44084288	TRUE	2.71709e-35	3.52412e-37	0.801282	0.14978	73	26	5	2
	chr7	6746518	6746667	TRUE	2.84498e-35	3.69768e-37	0.716667	0.144048	93	25	7	3
	chr4	95128659	95128808	TRUE	3.61246e-35	4.70494e-37	0.819048	0.0978622	56	14	8	4
	chr6	26365298	26365447	TRUE	3.73804e-35	4.8786e-37	0.731293	0.0988239	63	7	17	9
	chr9	98079943	98080092	TRUE	4.12356e-35	5.39289e-37	0.887821	0.22019	80	26	6	3
	chr5	72143830	72143979	TRUE	4.57572e-35	6.01673e-37	0.718413	0.0891215	59	15	8	3
	chr7	65338157	65338306	TRUE	4.57572e-35	6.02133e-37	0.888095	0.177593	79	28	4	2
	chr8	101162739	101162888	TRUE	4.57572e-35	5.99836e-37	0.894444	0.10463	50	15	7	3
	chr19	1479180	1479329	TRUE	5.10837e-35	6.73607e-37	0.887302	0.130911	55	21	5	2
	chr3	128444879	128445028	TRUE	5.42852e-35	7.1729e-37	0.983333	0.132633	44	20	3	2
	chr9	79009396	79009545	TRUE	5.72967e-35	7.60753e-37	0.800505	0.176276	94	33	6	2
	chr16	87984938	87985087	TRUE	5.72967e-35	7.61727e-37	0.927083	0.165523	57	24	4	2
	chr20	32700037	32700186	TRUE	5.72967e-35	7.59255e-37	0.821488	0.206288	100	20	9	5
	chr17	42976715	42976864	TRUE	5.94797e-35	7.92355e-37	0.790476	0.148602	76	28	5	2
	chr5	68485275	68485424	TRUE	6.67674e-35	8.91243e-37	0.803509	0.136862	75	19	7	3
	chr19	13885157	13885306	TRUE	6.8667e-35	9.18454e-37	0.764141	0.11833	79	22	7	3
	chr15	82555052	82555201	TRUE	7.0773e-35	9.48536e-37	0.825926	0.117537	58	27	4	2
	chr16	27214716	27214865	TRUE	7.36556e-35	9.8916e-37	0.652282	0.115966	102	24	8	4
	chr7	92076665	92076814	TRUE	7.41625e-35	9.97971e-37	0.609694	0.105635	115	28	8	4
	chr7	39872713	39872862	TRUE	7.86111e-35	1.05996e-36	0.667352	0.0929039	119	16	16	7
	chr19	21579831	21579980	TRUE	7.98188e-35	1.0784e-36	0.916667	0.154159	57	18	5	3
	chr2	27718038	27718187	TRUE	8.10303e-35	1.09696e-36	0.873563	0.170492	75	29	5	2
	chr16	67918681	67918830	TRUE	8.16325e-35	1.10731e-36	0.913514	0.251145	89	37	4	2
	chr1	25071778	25071927	TRUE	9.20335e-35	1.25089e-36	0.852252	0.222001	112	37	5	3
	chr11	68039421	68039570	TRUE	9.73459e-35	1.32705e-36	0.955128	0.135349	49	26	3	1
	chr17	72772422	72772571	TRUE	9.73459e-35	1.32835e-36	0.847826	0.123244	59	23	5	2
	chr9	135282173	135282322	TRUE	1.02061e-34	1.39545e-36	0.650974	0.123167	80	22	7	3
	chr7	107531486	107531635	TRUE	1.02724e-34	1.40729e-36	0.746379	0.130236	103	24	8	4
	chr1	40157041	40157190	TRUE	1.51879e-34	2.08481e-36	0.782323	0.153949	84	33	4	2
	chr11	36310951	36311100	TRUE	1.54036e-34	2.11858e-36	0.882353	0.118233	50	17	5	2
	chr19	11670003	11670152	TRUE	1.60993e-34	2.21862e-36	0.932773	0.157859	55	17	6	3
	chr1	62901875	62902024	TRUE	1.6822e-34	2.32275e-36	0.789683	0.132213	68	21	6	3
	chr7	27702554	27702703	TRUE	1.76927e-34	2.44776e-36	0.845614	0.208251	83	19	8	4
	chr5	54455884	54456033	TRUE	1.77706e-34	2.46334e-36	0.693814	0.125154	98	17	11	5
	chr19	44669149	44669298	TRUE	1.85474e-34	2.57602e-36	0.856481	0.0914502	43	18	4	2
	chr7	123174590	123174739	TRUE	1.88628e-34	2.62493e-36	0.806667	0.15059	72	25	5	2
	chr7	99036463	99036612	TRUE	2.06757e-34	2.88279e-36	0.892361	0.15944	68	24	5	2
	chr2	216974032	216974181	TRUE	2.1065e-34	2.94277e-36	0.875	0.161408	60	20	5	3
	chr17	60005329	60005478	TRUE	2.24007e-34	3.13542e-36	0.729147	0.168312	100	20	9	5
	chr20	11871377	11871526	TRUE	2.4143e-34	3.38581e-36	0.910714	0.0975848	44	28	2	1
	chr19	35264062	35264211	TRUE	2.70913e-34	3.8066e-36	0.833333	0.109689	52	24	4	2
	chr4	44680333	44680482	TRUE	2.72251e-34	3.83276e-36	0.816667	0.118804	63	20	6	3
	chr19	47852446	47852595	TRUE	2.79085e-34	3.9365e-36	0.876667	0.121006	67	25	5	2
	chr14	52456128	52456277	TRUE	2.80844e-34	3.96891e-36	0.825595	0.110878	63	28	4	2
	chr7	5553385	5553534	TRUE	2.8286e-34	4.00505e-36	0.771154	0.109684	61	26	4	2
	chr1	38478284	38478433	TRUE	2.83719e-34	4.02488e-36	0.721333	0.167818	117	25	9	4
	chr7	134331455	134331604	TRUE	3.03496e-34	4.31363e-36	0.887222	0.16258	60	15	7	4
	chr10	91461115	91461264	TRUE	3.28166e-34	4.67314e-36	0.859195	0.127764	63	29	4	2
	chr16	67515041	67515190	TRUE	3.3937e-34	4.84185e-36	0.824	0.137327	65	25	5	2
	chr3	106959431	106959580	TRUE	3.57859e-34	5.1153e-36	0.801075	0.117166	66	31	3	2
	chr15	40509529	40509678	TRUE	3.60303e-34	5.15998e-36	0.524311	0.103198	147	18	16	8
	chr10	62538136	62538285	TRUE	3.61011e-34	5.17988e-36	0.791667	0.169631	91	26	7	3
	chr3	184032256	184032405	TRUE	3.86135e-34	5.5508e-36	0.920139	0.164622	58	24	3	2
	chr4	75023725	75023874	TRUE	4.39566e-34	6.33075e-36	0.916667	0.15253	60	25	4	2
	chr19	1490359	1490508	TRUE	4.4604e-34	6.43605e-36	0.748551	0.137427	74	23	6	3
	chr7	102004230	102004379	TRUE	4.70788e-34	6.80586e-36	0.838667	0.17133	78	25	6	3
	chr19	2702698	2702847	TRUE	4.80265e-34	6.95585e-36	0.96875	0.118324	43	32	2	1
	chr17	35766881	35767030	TRUE	4.81998e-34	6.99398e-36	0.953704	0.155877	54	27	3	2
	chr7	45960452	45960601	TRUE	5.03425e-34	7.31848e-36	0.562886	0.180811	136	36	6	3
	chr5	54455896	54456045	TRUE	5.25676e-34	7.67037e-36	0.593405	0.125944	110	21	10	5
	chr12	53835333	53835482	TRUE	5.25676e-34	7.65675e-36	0.916667	0.138232	53	17	5	3
	chr7	102004241	102004390	TRUE	5.30276e-34	7.75183e-36	0.790805	0.17133	93	29	6	3
	chr5	159546404	159546553	TRUE	5.44433e-34	7.97348e-36	0.930556	0.202489	72	24	5	3
	chr5	72143920	72144069	TRUE	5.63183e-34	8.2633e-36	0.742282	0.11367	75	29	5	2
	chr17	38975274	38975423	TRUE	6.29608e-34	9.25494e-36	0.811828	0.201979	89	31	5	2
	chr16	83932630	83932779	TRUE	6.53477e-34	9.62346e-36	0.857143	0.149079	57	35	2	1
	chr12	25403815	25403964	TRUE	6.57521e-34	9.70079e-36	0.916667	0.148333	61	23	3	2
	chr3	47324340	47324489	TRUE	7.22034e-34	1.06721e-35	0.863095	0.106135	47	28	3	1
	chr2	27008782	27008931	TRUE	7.39969e-34	1.09572e-35	0.969298	0.168429	51	19	5	2
	chr19	19431530	19431679	TRUE	7.66575e-34	1.13719e-35	0.77877	0.115595	72	24	6	3
	chr15	59063293	59063442	TRUE	7.77815e-34	1.15596e-35	0.929333	0.184084	68	25	4	2
	chr1	156308147	156308296	TRUE	7.87214e-34	1.17206e-35	0.854329	0.155629	76	22	6	3
	chr5	140700303	140700452	TRUE	7.95745e-34	1.18691e-35	0.715476	0.134812	80	28	5	2
	chr10	43048217	43048366	TRUE	8.28124e-34	1.23744e-35	0.760234	0.130258	63	19	5	3
	chr7	18535262	18535411	TRUE	8.55783e-34	1.28109e-35	0.545	0.149169	174	20	17	8
	chr7	66057315	66057464	TRUE	9.01892e-34	1.35255e-35	0.770238	0.138685	86	19	9	4
	chr19	40854374	40854523	TRUE	9.02314e-34	1.35562e-35	0.968254	0.114172	42	21	4	2
	chr15	41047410	41047559	TRUE	9.03768e-34	1.36024e-35	0.913333	0.101076	44	25	3	1
	chr17	40811225	40811374	TRUE	9.77699e-34	1.47416e-35	0.722024	0.0925375	71	28	4	2
	chr11	85358945	85359094	TRUE	9.88865e-34	1.49366e-35	0.842949	0.144526	62	26	4	2
	chr3	171757318	171757467	TRUE	1.00636e-33	1.52282e-35	0.922222	0.118076	49	18	4	2
	chr7	65447198	65447347	TRUE	1.03125e-33	1.56326e-35	0.925714	0.140339	53	20	4	2
	chr17	27181943	27182092	TRUE	1.0986e-33	1.66833e-35	0.869565	0.123911	54	23	4	2
	chr17	1945177	1945326	TRUE	1.25337e-33	1.90675e-35	0.97619	0.16428	50	21	4	2
	chr10	35483955	35484104	TRUE	1.27904e-33	1.94925e-35	0.459801	0.0971536	109	15	13	7
	chr7	105221899	105222048	TRUE	1.2851e-33	1.96195e-35	0.482851	0.111883	108	21	9	5
	chr3	106959439	106959588	TRUE	1.3189e-33	2.01713e-35	0.776042	0.117166	67	32	3	2
	chr19	9879362	9879511	TRUE	1.34432e-33	2.05963e-35	0.745238	0.167399	84	30	5	2
	chr11	6633397	6633546	TRUE	1.40901e-33	2.16256e-35	0.92803	0.102486	42	22	4	1
	chr15	42749663	42749812	TRUE	1.42933e-33	2.1976e-35	0.577857	0.0791432	111	25	9	4
	chr17	41116412	41116561	TRUE	1.45188e-33	2.23619e-35	0.696712	0.10633	79	21	8	3
	chr7	91875180	91875329	TRUE	1.49016e-33	2.29918e-35	0.725905	0.152725	84	25	7	3
	chr7	107384486	107384635	TRUE	1.74343e-33	2.69467e-35	0.9	0.235299	73	22	6	3
	chr19	37663567	37663716	TRUE	1.76936e-33	2.73953e-35	0.719444	0.100753	68	18	8	3
	chr1	3713020	3713169	TRUE	1.91711e-33	2.97347e-35	0.916667	0.158971	56	32	3	1
	chr8	27630122	27630271	TRUE	2.08437e-33	3.23852e-35	0.926852	0.148108	54	18	5	3
	chr9	135753626	135753775	TRUE	2.35258e-33	3.6616e-35	0.849359	0.132456	61	26	5	2
	chr2	228582697	228582846	TRUE	2.52729e-33	3.94036e-35	0.651905	0.137277	85	20	7	4
	chr2	166326057	166326206	TRUE	2.68117e-33	4.18752e-35	0.590653	0.0787163	101	18	11	5
	chr7	120590717	120590866	TRUE	2.68577e-33	4.20197e-35	0.73794	0.143092	76	23	6	3
	chr7	110730962	110731111	TRUE	2.83905e-33	4.44943e-35	0.44804	0.0834009	135	18	16	7
	chr9	116102519	116102668	TRUE	3.2589e-33	5.11625e-35	0.630645	0.15279	122	31	8	3
	chr15	74753506	74753655	TRUE	3.31514e-33	5.21349e-35	0.738095	0.174583	87	21	8	4
	chr9	139839125	139839274	TRUE	3.92016e-33	6.17557e-35	0.72381	0.161885	98	35	5	2
	chr1	247267622	247267771	TRUE	4.14519e-33	6.54127e-35	0.833333	0.135357	65	21	6	3
	chr22	51021355	51021504	TRUE	4.15395e-33	6.5663e-35	0.971264	0.234025	61	29	4	2
	chr3	169684480	169684629	TRUE	4.42865e-33	7.0125e-35	0.810185	0.083532	49	18	5	2
	chr7	56119220	56119369	TRUE	4.62871e-33	7.3418e-35	0.802268	0.178523	82	21	6	3
	chr1	54665764	54665913	TRUE	5.25694e-33	8.35247e-35	0.7625	0.152038	74	20	7	3
	chr16	74700731	74700880	TRUE	5.42258e-33	8.63029e-35	0.789103	0.151059	81	26	5	3
	chr2	71295308	71295457	TRUE	5.55024e-33	8.84847e-35	0.928571	0.0949301	38	21	3	1
	chr5	159436080	159436229	TRUE	5.55778e-33	8.87551e-35	0.816032	0.124887	59	15	7	3
	chr8	11660090	11660239	TRUE	5.76458e-33	9.22133e-35	0.95977	0.148571	49	29	3	1
	chr2	96874041	96874190	TRUE	5.81741e-33	9.32156e-35	0.853659	0.139344	56	41	2	1
	chr19	50979636	50979785	TRUE	6.0196e-33	9.66181e-35	0.629032	0.0882602	69	31	4	2
	chr5	40835339	40835488	TRUE	6.03834e-33	9.7082e-35	0.972222	0.0966048	36	18	3	2
	chr7	30323823	30323972	TRUE	6.25073e-33	1.00666e-34	0.498486	0.104984	150	27	11	5
	chr7	18535269	18535418	TRUE	6.78007e-33	1.09557e-34	0.533333	0.150864	182	21	17	8
	chr12	27175383	27175532	TRUE	6.78007e-33	1.09389e-34	0.881818	0.171755	62	22	5	2
	chr19	40476973	40477122	TRUE	6.82621e-33	1.10487e-34	0.958824	0.184984	55	17	6	3
	chr1	54665740	54665889	TRUE	7.03114e-33	1.13994e-34	0.758333	0.149171	75	20	7	3
	chr9	130213636	130213785	TRUE	7.25109e-33	1.17756e-34	0.752435	0.155707	89	22	7	4
	chr3	42190726	42190875	TRUE	8.07835e-33	1.31408e-34	0.654762	0.115449	108	26	8	4
	chr7	11013416	11013565	TRUE	8.32663e-33	1.35672e-34	0.66969	0.165043	112	21	9	5
	chr7	65540734	65540883	TRUE	8.54291e-33	1.39427e-34	0.916667	0.169568	57	24	4	2
	chr5	112196893	112197042	TRUE	8.59885e-33	1.40572e-34	0.75463	0.104248	68	18	7	3
	chr17	38375509	38375658	TRUE	8.66471e-33	1.41883e-34	0.912879	0.157336	57	22	5	2
	chr9	116037821	116037970	TRUE	9.12952e-33	1.49741e-34	0.954167	0.162239	51	16	6	3
	chr7	135242588	135242737	TRUE	9.34209e-33	1.5348e-34	0.481919	0.109147	119	21	11	5
	chr8	22526613	22526762	TRUE	1.05158e-32	1.73047e-34	0.929365	0.136291	51	21	4	2
	chr5	118788048	118788197	TRUE	1.07267e-32	1.76808e-34	0.89	0.102844	47	15	6	3
	chr7	108210119	108210268	TRUE	1.08966e-32	1.79903e-34	0.737333	0.190608	92	25	7	3
	chr7	44887677	44887826	TRUE	1.10568e-32	1.82846e-34	0.772286	0.23933	117	25	9	4
	chr9	131084691	131084840	TRUE	1.20586e-32	1.99739e-34	0.699524	0.0896663	69	15	8	4
	chr11	64684615	64684764	TRUE	1.25148e-32	2.07633e-34	0.491954	0.0877723	76	29	4	2
	chr17	26662686	26662835	TRUE	1.25226e-32	2.08101e-34	0.911979	0.208501	71	32	4	2
	chr7	133812005	133812154	TRUE	1.25264e-32	2.08503e-34	0.766667	0.0858886	49	16	6	3
	chr7	100136734	100136883	TRUE	1.28814e-32	2.1476e-34	0.810714	0.190362	86	21	8	4
	chr1	145827055	145827204	TRUE	1.42009e-32	2.37142e-34	0.862903	0.131955	58	31	3	1
	chr11	117857009	117857158	TRUE	1.46342e-32	2.44773e-34	0.813725	0.108733	57	17	3	3
	chr1	203764651	203764800	TRUE	1.49916e-32	2.51561e-34	0.757557	0.134151	64	23	5	2
	chr10	97416519	97416668	TRUE	1.49916e-32	2.51206e-34	0.71045	0.142844	92	27	6	3
	chr5	149340200	149340349	TRUE	1.59111e-32	2.67421e-34	0.882051	0.200827	67	26	5	2
	chr1	155826960	155827109	TRUE	1.66773e-32	2.80749e-34	0.605429	0.118881	119	25	9	4
	chr5	36152089	36152238	TRUE	1.70975e-32	2.88285e-34	0.89881	0.195909	66	28	5	2
	chr4	129730679	129730828	TRUE	1.79348e-32	3.02887e-34	0.625595	0.103388	92	28	6	3
	chr3	48956181	48956330	TRUE	1.81093e-32	3.06324e-34	0.9	0.12705	47	20	4	2
	chr12	75905370	75905519	TRUE	1.81477e-32	3.07464e-34	0.645607	0.101545	84	18	10	4
	chr11	94706745	94706894	TRUE	1.87071e-32	3.17447e-34	0.954545	0.152906	44	22	3	2
	chr8	30515690	30515839	TRUE	1.93699e-32	3.29217e-34	0.938333	0.183675	59	20	5	2
	chr4	147096735	147096884	TRUE	2.20165e-32	3.74795e-34	0.525287	0.0944438	130	29	9	4
	chr19	57078790	57078939	TRUE	2.3237e-32	3.96199e-34	0.876812	0.144559	52	23	4	2
	chr1	230778158	230778307	TRUE	2.37672e-32	4.05882e-34	0.857843	0.164224	68	34	4	2
	chr17	72983627	72983776	TRUE	2.44645e-32	4.18451e-34	0.785526	0.117418	85	38	4	2
	chr7	107220610	107220759	TRUE	2.45852e-32	4.21179e-34	0.824074	0.14907	61	27	4	2
	chr4	6711548	6711697	TRUE	2.52824e-32	4.33807e-34	0.807143	0.149205	100	25	8	4
	chr1	116961155	116961304	TRUE	2.5571e-32	4.3945e-34	0.986111	0.107454	37	18	3	2
	chr10	104005159	104005308	TRUE	2.55959e-32	4.40569e-34	0.795421	0.265773	122	26	9	4
	chr19	56146282	56146431	TRUE	3.00016e-32	5.17212e-34	0.696476	0.16817	100	25	8	4
	chr19	15443294	15443443	TRUE	3.00679e-32	5.19169e-34	0.92803	0.16045	50	22	3	2
	chr14	58764802	58764951	TRUE	3.16424e-32	5.47211e-34	0.74023	0.186646	94	29	6	3
	chr19	58790126	58790275	TRUE	3.19022e-32	5.52565e-34	0.879121	0.160244	67	26	4	2
	chr18	9913855	9914004	TRUE	3.27437e-32	5.68024e-34	0.8	0.189464	73	35	4	2
	chr9	130922439	130922588	TRUE	3.32391e-32	5.77517e-34	0.87037	0.176355	55	27	3	2
	chr2	172290477	172290626	TRUE	3.37458e-32	5.87232e-34	0.764368	0.122085	68	29	4	2
	chr12	88535945	88536094	TRUE	3.59156e-32	6.25961e-34	0.705026	0.155688	66	18	7	3
	chr7	99070415	99070564	TRUE	3.6393e-32	6.35265e-34	0.794589	0.135814	71	22	6	3
	chr11	94706728	94706877	TRUE	3.68356e-32	6.43986e-34	0.969697	0.151488	46	22	4	2
	chr13	25497037	25497186	TRUE	3.89906e-32	6.82715e-34	0.92	0.182039	65	25	4	2
	chr1	163291494	163291643	TRUE	3.91464e-32	6.865e-34	0.880952	0.095312	45	21	4	2
	chr2	237478368	237478517	TRUE	3.96193e-32	6.95864e-34	0.713235	0.15524	86	34	5	2
	chr21	30445962	30446111	TRUE	4.10455e-32	7.22022e-34	0.824359	0.170984	67	26	5	2
	chr1	145209011	145209160	TRUE	4.17497e-32	7.35538e-34	0.928571	0.165446	53	28	4	1
	chr15	76196100	76196249	TRUE	4.24382e-32	7.48815e-34	0.905556	0.0884113	40	15	4	2
	chr9	5450459	5450608	TRUE	4.33943e-32	7.66857e-34	0.65	0.0740497	60	30	3	2
	chr22	29196512	29196661	TRUE	4.37235e-32	7.73858e-34	0.725694	0.171504	65	24	5	2
	chr7	22862373	22862522	TRUE	4.5451e-32	8.0566e-34	0.658696	0.127339	92	23	8	4
	chr10	99496780	99496929	TRUE	4.65898e-32	8.27105e-34	0.848333	0.141081	61	20	5	3
	chr3	50126268	50126417	TRUE	4.71782e-32	8.38826e-34	0.883333	0.104313	52	20	5	2
	chr12	120554611	120554760	TRUE	4.81296e-32	8.57041e-34	0.852941	0.180924	77	34	4	2
	chr8	120885800	120885949	TRUE	4.81343e-32	8.58426e-34	0.666234	0.0961398	79	22	7	3
	chr17	72869083	72869232	TRUE	5.04728e-32	9.01495e-34	0.896429	0.181567	58	28	4	2
	chr17	37213172	37213321	TRUE	5.18301e-32	9.27139e-34	0.633333	0.0886235	74	27	5	2
	chr10	99496782	99496931	TRUE	5.29622e-32	9.48821e-34	0.848333	0.141474	61	20	5	3
	chr4	103790035	103790184	TRUE	5.53373e-32	9.92865e-34	0.88	0.130038	49	25	2	1
	chr1	155715496	155715645	TRUE	5.5621e-32	9.9946e-34	0.863636	0.151667	59	22	5	2
	chr17	40811211	40811360	TRUE	5.56898e-32	1.0022e-33	0.684615	0.088723	71	26	5	2
	chr1	28969537	28969686	TRUE	5.6211e-32	1.0131e-33	0.86	0.140985	55	25	4	2
	chr3	49711335	49711484	TRUE	5.83253e-32	1.05278e-33	0.84127	0.164987	55	21	5	2
	chr17	47492194	47492343	TRUE	6.28514e-32	1.13618e-33	0.922222	0.113552	42	15	5	2
	chr3	61237085	61237234	TRUE	6.37045e-32	1.15332e-33	0.775439	0.0846789	48	19	5	2
	chr5	140079932	140080081	TRUE	6.79403e-32	1.23184e-33	0.677219	0.130857	83	22	7	3
	chr1	948747	948896	TRUE	6.95116e-32	1.26373e-33	0.870238	0.0714783	42	14	5	3
	chr14	54955696	54955845	TRUE	6.95116e-32	1.26409e-33	0.952667	0.18841	59	25	4	2
	chr2	67624342	67624491	TRUE	7.22012e-32	1.31495e-33	0.954545	0.0955534	39	22	3	1
	chr17	12921311	12921460	TRUE	7.42931e-32	1.35505e-33	0.776667	0.0998437	61	25	4	2
	chr9	131592037	131592186	TRUE	7.51003e-32	1.37181e-33	0.774667	0.161125	78	25	6	3
	chr7	4815164	4815313	TRUE	8.35275e-32	1.528e-33	0.791975	0.175112	83	27	6	3
	chr9	131084649	131084798	TRUE	8.49831e-32	1.55692e-33	0.569481	0.0805291	97	22	8	4
	chr20	443139	443288	TRUE	8.57713e-32	1.57368e-33	0.882812	0.214036	73	32	4	2
	chr18	32173182	32173331	TRUE	9.03795e-32	1.66067e-33	0.791836	0.146525	71	16	9	4
	chr7	1199750	1199899	TRUE	9.33346e-32	1.71749e-33	0.789683	0.109931	58	21	5	2
	chr15	74753481	74753630	TRUE	9.47863e-32	1.74676e-33	0.721667	0.170614	80	20	7	4
	chr11	925741	925890	TRUE	1.00665e-31	1.85783e-33	0.944444	0.162687	52	24	4	2
	chr1	1655727	1655876	TRUE	1.01559e-31	1.87706e-33	0.737745	0.12497	68	17	8	4
	chr7	56019511	56019660	TRUE	1.03062e-31	1.90763e-33	0.765152	0.0988377	67	22	6	3
	chr14	68162462	68162611	TRUE	1.16321e-31	2.15618e-33	0.61678	0.132016	99	21	8	4
	chr22	26879755	26879904	TRUE	1.23438e-31	2.29145e-33	0.711111	0.171409	91	33	5	2
	chr7	99006244	99006393	TRUE	1.24361e-31	2.31194e-33	0.687778	0.191856	109	30	7	3
	chr17	79935326	79935475	TRUE	1.27288e-31	2.36979e-33	0.926667	0.13268	49	25	3	1
	chr8	20054604	20054753	TRUE	1.27377e-31	2.37489e-33	0.887662	0.133227	57	22	5	2
	chr19	41220930	41221079	TRUE	1.33643e-31	2.49533e-33	0.797222	0.121884	62	30	3	2
	chr7	39663062	39663211	TRUE	1.42158e-31	2.662e-33	0.880769	0.12727	52	26	4	2
	chr22	26879772	26879921	TRUE	1.42158e-31	2.66105e-33	0.721212	0.175062	90	33	5	2
	chr7	6414026	6414175	TRUE	1.448e-31	2.7154e-33	0.819167	0.194521	73	20	6	3
	chr3	52188372	52188521	TRUE	1.45638e-31	2.73505e-33	0.883333	0.132903	53	16	3	3
	chr22	26879750	26879899	TRUE	1.45771e-31	2.74148e-33	0.706061	0.167888	90	33	5	2
	chr1	35325297	35325446	TRUE	1.63669e-31	3.0825e-33	0.93	0.115946	44	25	3	1
	chr22	21996442	21996591	TRUE	1.67546e-31	3.16006e-33	0.759259	0.129472	58	27	4	2
	chr22	38349488	38349637	TRUE	1.70398e-31	3.21844e-33	0.648889	0.133476	96	30	6	3
	chr3	45730578	45730727	TRUE	1.71454e-31	3.24303e-33	0.795125	0.146702	76	21	8	3
	chr1	171750661	171750810	TRUE	1.71572e-31	3.25258e-33	0.972917	0.197593	55	24	4	2
	chr5	65017893	65018042	TRUE	1.71572e-31	3.25452e-33	1	0.161295	41	28	2	1
	chr2	207024218	207024367	TRUE	1.71844e-31	3.26432e-33	0.973684	0.157229	46	19	4	2
	chr1	32573544	32573693	TRUE	1.77972e-31	3.38555e-33	0.538757	0.118148	84	21	8	4
	chr17	57297734	57297883	TRUE	2.06947e-31	3.94232e-33	0.775446	0.136036	70	32	4	2
	chr1	16971130	16971279	TRUE	2.09179e-31	3.9905e-33	0.864869	0.129094	65	17	8	3
	chr7	91875164	91875313	TRUE	2.14936e-31	4.10614e-33	0.72381	0.152725	79	23	7	3
	chr11	3078623	3078772	TRUE	2.17403e-31	4.15914e-33	0.86	0.17753	63	25	5	2
	chr5	157286120	157286269	TRUE	2.27627e-31	4.36089e-33	0.83125	0.146969	65	24	5	2
	chr8	27950484	27950633	TRUE	2.27906e-31	4.37238e-33	0.725758	0.0988154	65	22	5	2
	chr13	41885241	41885390	TRUE	2.3236e-31	4.46411e-33	0.754167	0.100953	54	24	4	2
	chr14	73925238	73925387	TRUE	2.42957e-31	4.67427e-33	0.737302	0.124553	55	14	7	3
	chr5	178368124	178368273	TRUE	2.47925e-31	4.77654e-33	0.733333	0.0957224	75	25	5	3
	chr4	100484777	100484926	TRUE	2.49744e-31	4.81834e-33	1	0.155623	40	16	4	2
	chr12	95397463	95397612	TRUE	2.51184e-31	4.8529e-33	0.650617	0.132898	94	27	7	3
	chr3	131221781	131221930	TRUE	2.71229e-31	5.24751e-33	0.910714	0.111435	43	14	5	3
	chr9	136325031	136325180	TRUE	2.75324e-31	5.33417e-33	0.820588	0.189112	93	34	5	2
	chr5	68485262	68485411	TRUE	2.7749e-31	5.38364e-33	0.792593	0.136862	70	18	7	3
	chr5	53606355	53606504	TRUE	2.92414e-31	5.68108e-33	0.795238	0.184169	88	28	6	3
	chr7	134464071	134464220	TRUE	3.0299e-31	5.89474e-33	0.36489	0.0764041	208	28	14	7
	chr5	43483913	43484062	TRUE	3.0372e-31	5.91716e-33	0.891304	0.141451	50	23	3	2
	chr17	40118659	40118808	TRUE	3.16945e-31	6.18338e-33	0.833333	0.14251	48	24	4	2
	chr19	52772724	52772873	TRUE	3.17632e-31	6.20536e-33	0.883333	0.13012	54	21	5	2
	chr3	169684474	169684623	TRUE	3.19709e-31	6.25457e-33	0.767544	0.0838391	52	19	5	2
	chr3	30647894	30648043	TRUE	3.34284e-31	6.54875e-33	0.753002	0.0884189	70	23	5	3
	chr22	40573829	40573978	TRUE	3.4145e-31	6.69836e-33	0.848485	0.225033	81	14	11	5
	chr13	26795930	26796079	TRUE	3.80577e-31	7.47621e-33	0.752932	0.129286	88	18	9	4
	chr4	48832915	48833064	TRUE	4.21377e-31	8.28909e-33	0.721795	0.0993592	60	26	4	2
	chr8	142011284	142011433	TRUE	4.22588e-31	8.32433e-33	0.836022	0.202023	78	31	4	2
	chr11	65601310	65601459	TRUE	4.4862e-31	8.84924e-33	0.896825	0.113338	47	21	4	2
	chr3	50396891	50397040	TRUE	4.60073e-31	9.08759e-33	0.873611	0.142198	56	24	4	2
	chr3	11314002	11314151	TRUE	4.6435e-31	9.18461e-33	0.972222	0.141171	43	21	3	2
	chr3	148847271	148847420	TRUE	4.67045e-31	9.25055e-33	0.718391	0.126524	64	29	4	2
	chr9	96792976	96793125	TRUE	4.74688e-31	9.41476e-33	0.953704	0.113592	41	18	2	2
	chr3	194392863	194393012	TRUE	4.80184e-31	9.53673e-33	0.762698	0.123132	65	21	6	3
	chr3	101443394	101443543	TRUE	4.82652e-31	9.59879e-33	0.784615	0.11988	66	26	4	2
	chr17	48172596	48172745	TRUE	4.85424e-31	9.66704e-33	0.856579	0.193428	74	19	7	3
	chr3	139062698	139062847	TRUE	5.12239e-31	1.02149e-32	0.713016	0.0970332	61	10	11	6
	chr16	50099781	50099930	TRUE	5.38203e-31	1.07472e-32	0.942308	0.115157	39	26	2	1
	chr1	150849138	150849287	TRUE	5.46117e-31	1.092e-32	0.901389	0.174872	64	24	5	2
	chr4	76439554	76439703	TRUE	5.64534e-31	1.13035e-32	0.73	0.109945	75	25	5	3
	chr7	23053722	23053871	TRUE	5.9046e-31	1.18386e-32	0.939474	0.216713	60	19	6	3
	chr7	150929475	150929624	TRUE	6.04733e-31	1.21411e-32	0.93	0.127131	43	25	3	1
	chr16	74402090	74402239	TRUE	6.06628e-31	1.21955e-32	0.928667	0.154826	54	25	4	2
	chr19	12917328	12917477	TRUE	6.10494e-31	1.22897e-32	0.747222	0.156821	72	30	4	2
	chr9	126773789	126773938	TRUE	6.21811e-31	1.25343e-32	0.957207	0.272055	70	37	3	1
	chr2	74756926	74757075	TRUE	6.29416e-31	1.27047e-32	0.958333	0.196797	54	18	5	3
	chr14	91580257	91580406	TRUE	6.3308e-31	1.27957e-32	0.701754	0.130837	75	38	4	1
	chr20	55043547	55043696	TRUE	6.43821e-31	1.30302e-32	0.867816	0.138018	49	29	3	1
	chr6	111580382	111580531	TRUE	6.80571e-31	1.37924e-32	0.793333	0.0768692	47	25	3	1
	chr15	42749682	42749831	TRUE	7.09425e-31	1.43963e-32	0.580642	0.0846044	104	23	9	4
	chr20	33999785	33999934	TRUE	7.14509e-31	1.45188e-32	0.932143	0.0959222	38	8	8	4
	chr1	28157193	28157342	TRUE	7.35744e-31	1.49701e-32	0.924242	0.157787	50	22	4	2
	chr19	10491193	10491342	TRUE	7.68998e-31	1.56675e-32	0.854989	0.142017	74	21	7	3
	chr7	98476013	98476162	TRUE	8.42631e-31	1.71905e-32	0.764371	0.138758	109	28	7	3
	chr2	201390842	201390991	TRUE	9.09876e-31	1.8587e-32	0.613441	0.137732	88	31	6	2
	chr1	40420720	40420869	TRUE	9.27323e-31	1.89684e-32	0.932099	0.16068	48	27	3	1
	chr19	58330994	58331143	TRUE	9.36118e-31	1.91736e-32	0.674603	0.146127	80	21	7	3
	chr9	79520955	79521104	TRUE	9.49479e-31	1.94729e-32	0.732143	0.122043	76	28	5	2
	chr19	58193257	58193406	TRUE	9.50421e-31	1.95179e-32	0.934211	0.103767	37	19	4	1
	chr7	5553351	5553500	TRUE	9.82501e-31	2.02033e-32	0.681034	0.0986986	81	29	5	2
	chr15	55700646	55700795	TRUE	9.85035e-31	2.0282e-32	0.812271	0.208778	95	26	7	3
	chr4	6711556	6711705	TRUE	9.94746e-31	2.05088e-32	0.79533	0.152465	100	26	7	3
	chr19	10491200	10491349	TRUE	1.02221e-30	2.11028e-32	0.854989	0.142817	74	21	7	3
	chr22	18507277	18507426	TRUE	1.04766e-30	2.16563e-32	0.888889	0.168301	56	27	3	2
	chr17	18266808	18266957	TRUE	1.08891e-30	2.25386e-32	0.853571	0.223749	82	28	5	2
	chr19	50083755	50083904	TRUE	1.09013e-30	2.25932e-32	0.87963	0.128389	53	18	6	2
	chr1	51425888	51426037	TRUE	1.13898e-30	2.36365e-32	0.851786	0.177148	74	28	5	2
	chr1	155826924	155827073	TRUE	1.15241e-30	2.39462e-32	0.586111	0.112818	107	24	8	4
	chr20	54967327	54967476	TRUE	1.19141e-30	2.47889e-32	0.713768	0.130542	86	23	7	3
	chr14	90421183	90421332	TRUE	1.25933e-30	2.62361e-32	0.887302	0.25847	85	21	7	4
	chr20	5730943	5731092	TRUE	1.28836e-30	2.68755e-32	0.68655	0.133116	93	19	9	4
	chr7	100895553	100895702	TRUE	1.30011e-30	2.71559e-32	0.750794	0.119369	67	21	6	3
	chr21	44299630	44299779	TRUE	1.30908e-30	2.73785e-32	0.795113	0.146194	60	19	6	3
	chr1	112162305	112162454	TRUE	1.32404e-30	2.77273e-32	0.838889	0.13424	52	30	3	1
	chr11	64084985	64085134	TRUE	1.35406e-30	2.83925e-32	0.747368	0.140347	75	19	8	3
	chr11	82611509	82611658	TRUE	1.36312e-30	2.86193e-32	0.86	0.189456	64	25	4	2
	chr19	35264086	35264235	TRUE	1.37509e-30	2.89078e-32	0.859649	0.116487	43	19	4	2
	chr16	70380691	70380840	TRUE	1.39042e-30	2.92677e-32	0.74892	0.16462	98	18	9	5
	chr7	148936674	148936823	TRUE	1.43757e-30	3.02989e-32	0.643229	0.142778	84	32	5	2
	chr2	27851831	27851980	TRUE	1.47954e-30	3.12236e-32	0.75	0.111922	62	22	5	2
	chr3	184429788	184429937	TRUE	1.58413e-30	3.34735e-32	0.904762	0.177063	55	21	4	2
	chr17	36003439	36003588	TRUE	1.5866e-30	3.35686e-32	0.822464	0.104519	52	23	4	2
	chr5	153418449	153418598	TRUE	1.63831e-30	3.4707e-32	0.854167	0.141184	49	16	3	3
	chr9	88555957	88556106	TRUE	1.67432e-30	3.5515e-32	0.944444	0.15653	47	18	4	2
	chr12	56390943	56391092	TRUE	1.73229e-30	3.67915e-32	0.925	0.158515	54	22	3	2
	chr7	149535404	149535553	TRUE	1.74673e-30	3.71455e-32	0.745238	0.170975	89	22	8	4
	chr22	36635641	36635790	TRUE	1.84773e-30	3.93431e-32	0.853448	0.142618	61	29	4	2
	chr5	153418451	153418600	TRUE	1.876e-30	4.00464e-32	0.877778	0.142533	47	15	3	3
	chr12	110888110	110888259	TRUE	1.876e-30	4.00425e-32	0.805556	0.138318	62	30	4	2
	chr9	97021478	97021627	TRUE	1.88251e-30	4.02364e-32	0.785464	0.103815	65	19	7	3
	chr1	160254883	160255032	TRUE	1.91994e-30	4.10882e-32	0.798363	0.170918	78	16	9	4
	chr10	103892687	103892836	TRUE	1.94131e-30	4.15979e-32	0.869565	0.158031	62	23	5	2
	chr7	21467589	21467738	TRUE	1.98455e-30	4.25783e-32	0.853456	0.296697	106	31	6	3
	chr15	91260479	91260628	TRUE	2.01272e-30	4.32369e-32	0.844697	0.147033	56	22	4	2
	chr17	42422391	42422540	TRUE	2.05706e-30	4.4245e-32	0.754687	0.147296	58	16	7	3
	chr16	2732398	2732547	TRUE	2.06405e-30	4.44511e-32	0.837719	0.0996651	42	19	4	2
	chr5	137667468	137667617	TRUE	2.15386e-30	4.64435e-32	0.747826	0.138338	81	23	6	3
	chr1	165738066	165738215	TRUE	2.15902e-30	4.66131e-32	0.964286	0.0801346	33	8	4	4
	chr15	74753462	74753611	TRUE	2.19518e-30	4.74531e-32	0.676087	0.164775	82	23	6	3
	chr22	24129050	24129199	TRUE	2.19678e-30	4.7547e-32	0.919298	0.166393	53	19	3	2
	chr19	46234103	46234252	TRUE	2.2696e-30	4.91845e-32	0.941103	0.1484	50	19	5	2
	chr15	77363465	77363614	TRUE	2.37261e-30	5.1481e-32	0.85101	0.249041	80	33	4	2
	chr2	224810004	224810153	TRUE	2.46589e-30	5.35716e-32	0.779279	0.189208	74	37	3	2
	chr22	26879746	26879895	TRUE	2.4685e-30	5.36949e-32	0.687097	0.167888	88	31	5	2
	chr12	6602423	6602572	TRUE	2.4815e-30	5.40448e-32	0.931818	0.0935441	35	22	3	1
	chr3	15247418	15247567	TRUE	2.52268e-30	5.50779e-32	0.573313	0.122831	82	24	7	3
	chr5	159827012	159827161	TRUE	2.52268e-30	5.50541e-32	0.67963	0.178284	125	27	9	4
	chr11	16760094	16760243	TRUE	2.71304e-30	5.93074e-32	0.848958	0.164709	59	16	5	3
	chr3	40566276	40566425	TRUE	2.74683e-30	6.01204e-32	0.903846	0.119332	41	26	2	1
	chr9	33025109	33025258	TRUE	2.75046e-30	6.02741e-32	0.924242	0.112557	44	22	3	2
	chr4	57253590	57253739	TRUE	2.78441e-30	6.10934e-32	0.802222	0.185047	77	30	5	2
	chr5	157286105	157286254	TRUE	2.99335e-30	6.58419e-32	0.803472	0.146511	67	24	5	2
	chr7	100183856	100184005	TRUE	2.99335e-30	6.57651e-32	0.895833	0.214571	61	20	5	3
	chr7	142960464	142960613	TRUE	2.99335e-30	6.59204e-32	0.634259	0.107736	64	36	3	1
	chr19	46366500	46366649	TRUE	2.99789e-30	6.61014e-32	0.916667	0.195206	60	22	5	2
	chr17	43239162	43239311	TRUE	3.01982e-30	6.66665e-32	0.766071	0.248792	100	28	6	3
	chr10	38383175	38383324	TRUE	3.18715e-30	7.04467e-32	0.855263	0.131182	49	19	5	2
	chr3	120461336	120461485	TRUE	3.27876e-30	7.25602e-32	0.921569	0.113415	40	17	4	2
	chr6	31671040	31671189	TRUE	3.85583e-30	8.54352e-32	0.690896	0.103595	80	34	4	2
	chr11	10562726	10562875	TRUE	3.93794e-30	8.73608e-32	0.916667	0.177857	59	20	5	2
	chr5	21459534	21459683	TRUE	4.00858e-30	8.90363e-32	0.946667	0.11364	42	25	3	1
	chr4	83956139	83956288	TRUE	4.11676e-30	9.15502e-32	0.986111	0.153295	41	18	3	2
	chr19	57922429	57922578	TRUE	4.33792e-30	9.65858e-32	0.840909	0.0978487	45	22	3	2
	chr5	132387562	132387711	TRUE	4.4801e-30	9.98724e-32	0.903704	0.167808	55	18	6	3
	chr2	122513021	122513170	TRUE	4.50585e-30	1.00568e-31	0.860526	0.138239	52	19	4	2
	chr15	22833295	22833444	TRUE	4.58403e-30	1.02437e-31	0.761364	0.186687	77	22	7	3
	chr4	40859112	40859261	TRUE	4.77665e-30	1.06871e-31	0.776316	0.166662	67	38	3	1
	chr4	76649747	76649896	TRUE	4.81385e-30	1.08092e-31	0.780357	0.164698	85	28	5	3
	chr7	72971533	72971682	TRUE	4.81385e-30	1.07856e-31	0.79902	0.171978	70	34	4	2
	chr19	36486001	36486150	TRUE	4.81385e-30	1.08093e-31	0.814444	0.147292	74	30	4	2
	chr11	10315706	10315855	TRUE	4.81811e-30	1.08319e-31	0.78	0.150878	62	25	3	2
	chr19	5622890	5623039	TRUE	4.90716e-30	1.10453e-31	0.968254	0.170453	46	21	4	2
	chr17	79995525	79995674	TRUE	4.99879e-30	1.12651e-31	0.815476	0.246473	74	28	4	2
	chr14	69864973	69865122	TRUE	5.50225e-30	1.24146e-31	0.821429	0.135564	59	28	4	2
	chr11	67033805	67033954	TRUE	5.53207e-30	1.24968e-31	0.736111	0.113857	60	36	3	1
	chr10	131934563	131934712	TRUE	5.71663e-30	1.29292e-31	0.870968	0.150614	54	31	3	1
	chr22	30234206	30234355	TRUE	5.93221e-30	1.34328e-31	0.78	0.104326	53	20	5	2
	chr14	50087301	50087450	TRUE	6.25447e-30	1.41794e-31	0.952381	0.154989	41	21	3	1
	chr17	34891303	34891452	TRUE	6.3989e-30	1.45241e-31	0.766575	0.178805	77	26	5	2
	chr13	53226901	53227050	TRUE	6.5588e-30	1.49047e-31	0.857143	0.206233	59	21	5	2
	chr7	134001755	134001904	TRUE	6.68218e-30	1.52032e-31	0.880952	0.19415	52	21	4	2
	chr3	9005098	9005247	TRUE	6.71063e-30	1.52861e-31	0.74375	0.135862	73	24	6	3
	chr10	88281493	88281642	TRUE	6.98721e-30	1.59349e-31	0.956522	0.17507	49	23	3	2
	chr17	35766854	35767003	TRUE	7.37533e-30	1.684e-31	0.848214	0.151486	54	28	3	1
	chr11	43333433	43333582	TRUE	7.57694e-30	1.73208e-31	0.866667	0.190422	63	20	5	3
	chr9	116172835	116172984	TRUE	7.79414e-30	1.78384e-31	0.762037	0.168017	63	18	7	3
	chr1	202317736	202317885	TRUE	7.95644e-30	1.82314e-31	0.7125	0.139093	77	24	6	3
	chr1	111682733	111682882	TRUE	8.36259e-30	1.91846e-31	0.766667	0.207351	91	27	6	3
	chr19	10713033	10713182	TRUE	8.37209e-30	1.9229e-31	0.796667	0.119846	54	25	3	2
	chr19	48825143	48825292	TRUE	8.6439e-30	1.98767e-31	0.936508	0.165962	45	18	4	2
	chr18	21166422	21166571	TRUE	8.86442e-30	2.04077e-31	0.92029	0.12895	44	23	3	1
	chr7	102105290	102105439	TRUE	8.9155e-30	2.05494e-31	0.787333	0.155793	79	25	6	3
	chr7	102105240	102105389	TRUE	9.01152e-30	2.07951e-31	0.685897	0.144141	93	26	7	3
	chr1	33896567	33896716	TRUE	9.04945e-30	2.0907e-31	0.941176	0.156508	41	17	3	2
	chr19	36139055	36139204	TRUE	9.09253e-30	2.10311e-31	0.869608	0.152505	60	17	6	3
	chr1	6453778	6453927	TRUE	9.62085e-30	2.22792e-31	0.916667	0.220079	66	26	5	2
	chr13	108867834	108867983	TRUE	9.66274e-30	2.24023e-31	0.961538	0.131995	40	26	2	1
	chr16	30194826	30194975	TRUE	9.66584e-30	2.24356e-31	0.836022	0.170257	73	31	4	2
	chr11	67374223	67374372	TRUE	9.68719e-30	2.25113e-31	0.969697	0.17326	46	22	3	2
	chr2	211341383	211341532	TRUE	1.00569e-29	2.33975e-31	0.805833	0.108912	57	20	5	2
	chr7	5821244	5821393	TRUE	1.04e-29	2.4224e-31	0.757937	0.161689	82	27	5	3
	chr1	109234832	109234981	TRUE	1.0442e-29	2.43501e-31	0.790278	0.119443	52	24	4	2
	chr7	7222146	7222295	TRUE	1.07249e-29	2.50388e-31	0.810606	0.208678	95	33	5	2
	chr3	42845979	42846128	TRUE	1.16421e-29	2.72115e-31	0.844444	0.129708	50	24	3	2
	chr11	10879318	10879467	TRUE	1.34899e-29	3.15668e-31	0.666667	0.109716	70	24	5	2
	chr17	7155352	7155501	TRUE	1.38e-29	3.2352e-31	0.903333	0.212915	69	25	5	2
	chr19	11450273	11450422	TRUE	1.38e-29	3.23671e-31	0.927536	0.130029	46	23	3	2
	chr1	161284066	161284215	TRUE	1.42394e-29	3.34361e-31	0.765741	0.114899	58	18	5	3
	chr4	144303001	144303150	TRUE	1.43945e-29	3.38392e-31	0.654127	0.12307	81	15	10	5
	chr19	52490031	52490180	TRUE	1.44076e-29	3.39088e-31	0.593315	0.0689572	59	13	9	4
	chr2	234160117	234160266	TRUE	1.45059e-29	3.42188e-31	0.602381	0.12043	74	35	4	2
	chr10	104192375	104192524	TRUE	1.45059e-29	3.42019e-31	0.780303	0.142689	56	22	5	2
	chr1	46664073	46664222	TRUE	1.48961e-29	3.51795e-31	0.861111	0.139528	61	33	3	1
	chr1	193028473	193028622	TRUE	1.55447e-29	3.67531e-31	0.871212	0.188686	60	22	5	2
	chr18	55297482	55297631	TRUE	1.57756e-29	3.73416e-31	0.897619	0.105662	42	14	6	3
	chr6	28411231	28411380	TRUE	1.59618e-29	3.78256e-31	1	0.0893219	29	9	6	3
	chr14	50583249	50583398	TRUE	1.71078e-29	4.05875e-31	0.757639	0.147871	68	24	5	2
	chr11	10562719	10562868	TRUE	1.81954e-29	4.3217e-31	0.916667	0.172088	57	20	4	2
	chr1	98386567	98386716	TRUE	1.85275e-29	4.4056e-31	0.768229	0.177158	74	32	4	2
	chr1	54519174	54519323	TRUE	1.87821e-29	4.47192e-31	0.889474	0.186705	55	19	5	2
	chr12	117175996	117176145	TRUE	1.87821e-29	4.47628e-31	0.897727	0.179091	56	22	4	2
	chr9	547048	547197	TRUE	1.91357e-29	4.56572e-31	0.738095	0.103085	62	21	6	2
	chr5	54603473	54603622	TRUE	1.9642e-29	4.69715e-31	0.892667	0.203781	67	25	5	2
	chr5	54603476	54603625	TRUE	1.9642e-29	4.69715e-31	0.892667	0.203781	67	25	5	2
	chr7	42951461	42951610	TRUE	2.02127e-29	4.83908e-31	0.817308	0.148388	68	26	4	2
	chr7	99102173	99102322	TRUE	2.05922e-29	4.93549e-31	0.70869	0.140384	75	20	7	3
	chr2	216176592	216176741	TRUE	2.06622e-29	4.96343e-31	0.753086	0.109219	60	27	3	2
	chr7	97601590	97601739	TRUE	2.06622e-29	4.95799e-31	0.514744	0.11766	111	26	8	4
	chr7	96339155	96339304	TRUE	2.15808e-29	5.18992e-31	0.723571	0.1241	81	15	11	5
	chr12	69864029	69864178	TRUE	2.18766e-29	5.26698e-31	0.925	0.107157	36	20	3	1
	chr2	171551836	171551985	TRUE	2.2395e-29	5.39784e-31	0.641398	0.124195	81	31	5	2
	chr17	30469373	30469522	TRUE	2.2736e-29	5.48619e-31	0.93631	0.197445	59	28	3	2
	chr5	175788761	175788910	TRUE	2.33492e-29	5.64045e-31	0.904167	0.149962	51	20	4	2
	chr19	37019122	37019271	TRUE	2.38929e-29	5.77824e-31	0.898148	0.09462	40	18	4	2
	chr19	45681437	45681586	TRUE	2.39841e-29	5.80679e-31	0.842029	0.147069	64	23	5	2
	chr2	74756752	74756901	TRUE	2.41284e-29	5.84825e-31	0.859848	0.144382	56	22	4	2
	chr10	50747099	50747248	TRUE	2.42824e-29	5.89212e-31	0.762667	0.126143	75	25	5	3
	chr15	78591892	78592041	TRUE	2.42928e-29	5.90121e-31	0.663978	0.107954	77	31	5	2
	chr7	66147051	66147200	TRUE	2.47925e-29	6.0293e-31	0.760317	0.14523	69	21	6	3
	chr5	153418459	153418608	TRUE	2.49115e-29	6.06496e-31	0.897436	0.147066	44	13	3	3
	chr17	40169382	40169531	TRUE	2.49767e-29	6.08761e-31	0.791126	0.124473	63	22	5	2
	chr7	138720727	138720876	TRUE	2.55822e-29	6.24209e-31	0.964744	0.180421	49	26	3	1
	chr12	54653322	54653471	TRUE	2.59926e-29	6.34924e-31	0.669956	0.155653	135	31	9	4
	chr19	45681447	45681596	TRUE	2.67996e-29	6.55362e-31	0.842029	0.147434	64	23	5	2
	chr19	893170	893319	TRUE	2.75048e-29	6.7335e-31	0.777778	0.161727	76	24	6	3
	chr19	47164635	47164784	TRUE	2.76607e-29	6.77913e-31	0.890805	0.275367	81	29	5	2
	chr6	31865416	31865565	TRUE	2.76824e-29	6.79194e-31	0.952381	0.13187	37	21	1	1
	chr16	4897255	4897404	TRUE	2.9307e-29	7.19846e-31	0.94	0.127483	41	25	3	1
	chr11	14913703	14913852	TRUE	3.08739e-29	7.59167e-31	0.902174	0.170333	52	23	4	2
	chr2	242626179	242626328	TRUE	3.20918e-29	7.89981e-31	0.847222	0.12195	50	24	4	2
	chr15	89089836	89089985	TRUE	3.27268e-29	8.06497e-31	0.85	0.133549	52	25	3	2
	chr9	108210225	108210374	TRUE	3.31126e-29	8.169e-31	0.818841	0.129474	55	23	4	2
	chr4	169418117	169418266	TRUE	3.4325e-29	8.47738e-31	0.615357	0.0896034	102	18	11	5
	chr7	120628651	120628800	TRUE	3.44138e-29	8.50859e-31	0.53102	0.140575	149	35	8	4
	chr20	25990363	25990512	TRUE	3.54794e-29	8.78164e-31	0.719048	0.120156	75	25	5	3
	chr9	114393532	114393681	TRUE	3.69928e-29	9.16623e-31	0.880952	0.145497	54	35	3	1
	chr2	120436643	120436792	TRUE	3.77068e-29	9.35334e-31	0.833333	0.133584	50	23	3	2
	chr12	49297832	49297981	TRUE	3.83668e-29	9.52743e-31	0.75	0.0796044	52	17	6	3
	chr7	45808515	45808664	TRUE	3.86524e-29	9.60879e-31	0.910714	0.145697	50	10	9	5
	chr11	17229482	17229631	TRUE	3.8941e-29	9.69106e-31	0.968254	0.172251	45	21	3	2
	chr1	165738051	165738200	TRUE	3.94508e-29	9.82858e-31	0.826984	0.0754376	40	10	5	4
	chr1	44115697	44115846	TRUE	3.97655e-29	9.91772e-31	0.770833	0.15254	72	28	4	2
	chr15	42500454	42500603	TRUE	3.99396e-29	9.97194e-31	0.875	0.157284	56	20	5	2
	chr16	25122947	25123096	TRUE	4.09472e-29	1.02346e-30	0.842262	0.157956	62	28	4	2
	chr12	54653281	54653430	TRUE	4.13632e-29	1.03497e-30	0.768323	0.156321	85	23	7	3
	chr14	78227449	78227598	TRUE	4.18127e-29	1.04735e-30	0.881793	0.127637	47	17	6	2
	chr22	19842414	19842563	TRUE	4.28403e-29	1.07425e-30	0.665278	0.174147	67	24	4	2
	chr19	44860808	44860957	TRUE	4.29682e-29	1.07862e-30	0.9	0.109423	44	13	6	3
	chr17	77030372	77030521	TRUE	4.36828e-29	1.09774e-30	0.627425	0.17698	79	27	6	2
	chr1	28559494	28559643	TRUE	4.4535e-29	1.12036e-30	0.721014	0.111649	76	23	6	3
	chr16	1470697	1470846	TRUE	4.5607e-29	1.14855e-30	0.848039	0.163366	59	17	5	3
	chr1	109618576	109618725	TRUE	4.56125e-29	1.14993e-30	0.710317	0.11534	54	21	4	2
	chr21	33031835	33031984	TRUE	4.56352e-29	1.15173e-30	0.753788	0.157985	60	22	5	2
	chr11	31391277	31391426	TRUE	4.61451e-29	1.16585e-30	0.920635	0.0904151	39	21	3	1
	chr8	681178	681327	TRUE	4.86045e-29	1.2293e-30	0.944444	0.109029	38	18	4	2
	chr4	26321232	26321381	TRUE	4.89995e-29	1.24061e-30	0.9275	0.215594	54	20	5	2
	chr4	84376964	84377113	TRUE	4.96195e-29	1.25765e-30	0.748148	0.108747	51	18	6	2
	chr5	112312333	112312482	TRUE	5.08557e-29	1.29036e-30	0.846377	0.140824	53	23	4	2
	chr17	57970343	57970492	TRUE	5.22199e-29	1.32638e-30	0.86	0.17498	61	25	4	2
	chr8	92261416	92261565	TRUE	5.35055e-29	1.36048e-30	0.745238	0.0732433	55	14	7	3
	chr16	89883017	89883166	TRUE	5.46263e-29	1.39046e-30	0.934524	0.177002	48	28	2	1
	chr9	131038325	131038474	TRUE	5.62521e-29	1.43336e-30	0.719156	0.155997	83	22	10	3
	chr10	97889713	97889862	TRUE	5.68854e-29	1.45103e-30	0.6	0.08729	70	25	5	2
	chr2	65357241	65357390	TRUE	5.78177e-29	1.47638e-30	0.845833	0.164829	65	28	4	2
	chr2	217363420	217363569	TRUE	5.818e-29	1.4872e-30	0.785417	0.10532	52	12	7	4
	chr2	27805793	27805942	TRUE	5.83133e-29	1.49218e-30	0.82197	0.138606	60	22	6	2
	chr4	4291795	4291944	TRUE	5.87205e-29	1.50419e-30	0.738194	0.14176	55	24	5	2
	chr1	150266169	150266318	TRUE	5.95334e-29	1.52662e-30	0.780392	0.119002	58	17	6	3
	chr4	6988789	6988938	TRUE	6.02452e-29	1.5465e-30	0.842262	0.158956	60	28	3	2
	chr15	49170190	49170339	TRUE	6.51724e-29	1.67474e-30	0.678261	0.114486	78	23	6	3
	chr17	48796877	48797026	TRUE	6.68705e-29	1.72019e-30	0.78125	0.151248	66	24	5	2
	chr9	130186553	130186702	TRUE	6.86024e-29	1.76659e-30	0.765608	0.15744	90	21	8	4
	chr11	71639983	71640132	TRUE	6.89403e-29	1.77716e-30	0.825641	0.165434	65	26	4	2
	chr17	6735012	6735161	TRUE	6.99553e-29	1.80521e-30	0.806667	0.0937972	53	25	4	2
	chr19	14063219	14063368	TRUE	7.43341e-29	1.92022e-30	0.817749	0.192166	66	22	6	3
	chr4	926126	926275	TRUE	7.79482e-29	2.01568e-30	0.868056	0.137738	56	24	4	2
	chr6	26421519	26421668	TRUE	8.29521e-29	2.14732e-30	0.769444	0.100438	44	10	8	4
	chr10	98273620	98273769	TRUE	8.31996e-29	2.15598e-30	0.907843	0.239992	82	34	4	2
	chr14	39644287	39644436	TRUE	8.38385e-29	2.1748e-30	0.884921	0.12381	46	21	4	2
	chr9	130679257	130679406	TRUE	8.70909e-29	2.26152e-30	0.872222	0.154284	55	30	3	1
	chr9	32384501	32384650	TRUE	8.79092e-29	2.28515e-30	0.754167	0.166697	67	32	4	2
	chr10	70748393	70748542	TRUE	8.80671e-29	2.29163e-30	0.721805	0.105149	71	19	6	3
	chr3	129407452	129407601	TRUE	8.83214e-29	2.30063e-30	0.560912	0.150678	117	23	10	5
	chr8	102217912	102218061	TRUE	8.90233e-29	2.32132e-30	0.983333	0.158853	40	30	2	1
	chr1	15478894	15479043	TRUE	8.97793e-29	2.34346e-30	0.941176	0.130599	43	17	4	2
	chr2	150444223	150444372	TRUE	9.18727e-29	2.40059e-30	0.806548	0.187758	77	28	5	2
	chr1	145470408	145470557	TRUE	9.54641e-29	2.49701e-30	0.885417	0.0987247	40	16	5	2
	chr19	37329236	37329385	TRUE	9.81645e-29	2.57029e-30	0.763333	0.125646	59	15	7	3
	chr2	74881293	74881442	TRUE	9.88684e-29	2.5914e-30	0.913043	0.130941	43	23	3	1
	chr7	75623905	75624054	TRUE	9.89664e-29	2.59664e-30	0.857738	0.203858	68	16	5	4
	chr4	39183924	39184073	TRUE	9.91381e-29	2.60382e-30	0.868421	0.16084	54	19	5	2
	chr1	15478899	15479048	TRUE	9.924e-29	2.60918e-30	0.941176	0.130965	43	17	4	2
	chr5	178450706	178450855	TRUE	1.00566e-28	2.64676e-30	0.6775	0.113542	60	20	5	3
	chr8	144911161	144911310	TRUE	1.01756e-28	2.68083e-30	0.958333	0.137019	37	24	2	1
	chr2	183988983	183989132	TRUE	1.02553e-28	2.70459e-30	0.74537	0.123587	62	18	7	3
	chr18	12407828	12407977	TRUE	1.05407e-28	2.78271e-30	0.867647	0.179922	55	34	3	1
	chr1	45805581	45805730	TRUE	1.13503e-28	2.99952e-30	0.827273	0.145049	68	22	5	3
	chr12	88536001	88536150	TRUE	1.15556e-28	3.05689e-30	0.567619	0.159078	78	25	6	3
	chr2	32581996	32582145	TRUE	1.26582e-28	3.35198e-30	0.811806	0.151692	62	24	5	2
	chr5	114598521	114598670	TRUE	1.28849e-28	3.41549e-30	0.792029	0.1369	61	23	5	2
	chr5	149380123	149380272	TRUE	1.34096e-28	3.55821e-30	0.768116	0.129423	56	23	4	2
	chr5	64777656	64777805	TRUE	1.43393e-28	3.80877e-30	0.64359	0.171154	98	26	7	3
	chr5	151031740	151031889	TRUE	1.49225e-28	3.97019e-30	0.501087	0.091681	110	23	9	4
	chr17	12921273	12921422	TRUE	1.49225e-28	3.97176e-30	0.717949	0.0976974	55	26	4	2
	chr12	111051831	111051980	TRUE	1.50431e-28	4.00791e-30	0.883929	0.151238	48	28	3	1
	chr1	86861955	86862104	TRUE	1.6093e-28	4.292e-30	0.715054	0.12473	67	31	4	2
	chr4	79860534	79860683	TRUE	1.71166e-28	4.5696e-30	0.919355	0.113242	38	31	2	1
	chr7	99717165	99717314	TRUE	1.72734e-28	4.61614e-30	0.647403	0.167597	120	22	10	5
	chr12	95867722	95867871	TRUE	1.75033e-28	4.68229e-30	0.783333	0.12671	48	20	3	2
	chr5	128430342	128430491	TRUE	1.80174e-28	4.8247e-30	0.924242	0.227888	55	33	3	1
	chr20	35917951	35918100	TRUE	1.93058e-28	5.17491e-30	0.634259	0.0761584	49	18	5	2
	chr10	99258318	99258467	TRUE	1.98656e-28	5.33036e-30	0.840805	0.180388	73	29	5	2
	chr16	70380602	70380751	TRUE	1.98872e-28	5.34151e-30	0.696142	0.15145	96	18	10	5
	chr9	114393521	114393670	TRUE	2.03739e-28	5.47774e-30	0.901042	0.145497	49	32	3	1
	chr2	26624684	26624833	TRUE	2.08716e-28	5.6172e-30	0.654321	0.107252	71	27	5	2
	chr6	7590332	7590481	TRUE	2.25984e-28	6.08803e-30	0.766667	0.107566	50	18	4	2
	chr17	40985323	40985472	TRUE	2.39169e-28	6.44971e-30	0.694444	0.125829	67	27	4	2
	chr17	27229927	27230076	TRUE	2.47581e-28	6.68324e-30	0.842857	0.113414	51	28	3	1
	chr9	139981279	139981428	TRUE	2.52414e-28	6.82053e-30	0.857639	0.182162	57	24	4	2
	chr17	11924035	11924184	TRUE	2.53774e-28	6.86414e-30	0.833333	0.114998	44	18	2	2
	chr7	99716925	99717074	TRUE	2.61446e-28	7.0787e-30	0.650737	0.129459	142	28	10	5
	chr11	46867795	46867944	TRUE	2.67396e-28	7.24703e-30	0.988095	0.125675	35	21	3	1
	chr19	4342735	4342884	TRUE	2.68185e-28	7.27567e-30	0.739683	0.165321	66	21	6	3
	chr7	27135577	27135726	TRUE	2.7624e-28	7.50166e-30	0.75034	0.139078	91	21	8	4
	chr1	227127838	227127987	TRUE	2.84312e-28	7.72853e-30	0.944444	0.242597	57	36	3	1
	chr12	57881620	57881769	TRUE	2.88777e-28	7.85772e-30	0.805742	0.140548	63	17	7	3
	chr19	53073428	53073577	TRUE	2.88981e-28	7.87108e-30	0.772556	0.132711	70	19	7	3
	chr6	24667067	24667216	TRUE	2.90218e-28	7.91261e-30	1	0.171461	38	21	3	1
	chr3	8543284	8543433	TRUE	2.91313e-28	7.95035e-30	0.821839	0.180901	65	29	4	2
	chr1	246729515	246729664	TRUE	2.97046e-28	8.11483e-30	0.921569	0.108165	39	17	4	2
	chr22	32808226	32808375	TRUE	3.10373e-28	8.4873e-30	0.828704	0.159025	53	18	5	2
	chr9	139377459	139377608	TRUE	3.14331e-28	8.604e-30	0.859649	0.141805	44	19	4	2
	chr12	69139836	69139985	TRUE	3.26464e-28	8.94496e-30	0.779762	0.101695	57	28	4	2
	chr20	36661848	36661997	TRUE	3.32631e-28	9.1229e-30	0.713324	0.121915	61	17	7	3
	chr12	122710551	122710700	TRUE	3.34279e-28	9.17714e-30	0.858025	0.16498	56	27	4	2
	chr16	56459396	56459545	TRUE	3.37814e-28	9.28332e-30	0.9375	0.194908	52	16	3	3
	chr19	18682514	18682663	TRUE	3.39832e-28	9.34796e-30	0.77029	0.170576	61	23	4	2
	chr10	5454418	5454567	TRUE	3.4676e-28	9.54789e-30	0.759259	0.0902855	45	18	4	2
	chr3	33686916	33687065	TRUE	3.58901e-28	9.89188e-30	0.568869	0.0799623	99	20	9	4
	chr11	12399046	12399195	TRUE	3.63144e-28	1.00186e-29	0.782051	0.124299	58	26	4	2
	chr1	161087791	161087940	TRUE	3.66328e-28	1.01164e-29	0.735119	0.115663	63	28	4	2
	chr3	32726598	32726747	TRUE	3.84297e-28	1.0623e-29	0.90625	0.102964	40	16	3	2
	chr2	71454185	71454334	TRUE	3.86299e-28	1.06888e-29	0.855797	0.188764	60	23	5	2
	chr4	100815655	100815804	TRUE	3.988e-28	1.10454e-29	0.877193	0.117238	46	19	4	2
	chr11	31391273	31391422	TRUE	4.05474e-28	1.12413e-29	0.916667	0.0904151	38	20	3	1
	chr14	21945235	21945384	TRUE	4.10762e-28	1.13989e-29	0.66886	0.156289	80	19	7	4
	chr17	4634623	4634772	TRUE	4.39072e-28	1.21964e-29	0.862281	0.171858	57	19	6	3
	chr7	150929485	150929634	TRUE	4.47987e-28	1.24562e-29	0.91	0.129668	42	25	3	1
	chr6	33239752	33239901	TRUE	4.73185e-28	1.31696e-29	0.717404	0.129536	64	21	7	3
	chr1	235491769	235491918	TRUE	5.18073e-28	1.44329e-29	0.789065	0.266945	119	27	8	4
	chr6	43337133	43337282	TRUE	5.23123e-28	1.45877e-29	0.661765	0.175842	77	34	4	2
	chr12	121790154	121790303	TRUE	5.25723e-28	1.46744e-29	0.807843	0.144042	56	17	6	3
	chr17	6347695	6347844	TRUE	5.39121e-28	1.5063e-29	0.838542	0.232292	81	32	5	2
	chr4	123844125	123844274	TRUE	5.47163e-28	1.53025e-29	0.7475	0.177568	81	20	8	4
	chr7	32996952	32997101	TRUE	5.72091e-28	1.60151e-29	0.768543	0.134396	83	33	4	2
	chr14	23058095	23058244	TRUE	5.73426e-28	1.6068e-29	0.670833	0.0786707	49	20	4	2
	chr1	213031382	213031531	TRUE	5.92891e-28	1.66294e-29	0.908333	0.124086	45	20	3	2
	chr17	49230820	49230969	TRUE	6.02924e-28	1.69271e-29	0.838636	0.161812	61	22	6	2
	chr2	99952812	99952961	TRUE	6.19323e-28	1.74042e-29	0.833333	0.150266	57	18	6	3
	chr5	37371149	37371298	TRUE	6.28512e-28	1.76794e-29	0.815135	0.133979	63	9	9	7
	chr12	6833121	6833270	TRUE	6.50748e-28	1.83225e-29	0.899206	0.137697	51	21	4	2
	chr8	33330616	33330765	TRUE	7.11613e-28	2.00555e-29	0.917333	0.170094	50	25	3	2
	chr1	204485411	204485560	TRUE	7.23681e-28	2.04151e-29	0.795455	0.114094	47	22	3	2
	chr19	9250986	9251135	TRUE	7.39668e-28	2.08861e-29	0.810417	0.139503	55	16	6	3
	chr19	37096121	37096270	TRUE	7.45227e-28	2.10632e-29	0.868841	0.121134	57	23	4	2
	chr2	201753991	201754140	TRUE	7.52001e-28	2.1275e-29	0.788889	0.189767	66	18	7	3
	chr16	15188110	15188259	TRUE	7.69913e-28	2.18025e-29	0.871739	0.0981047	51	23	3	2
	chr16	69419825	69419974	TRUE	8.0416e-28	2.27941e-29	0.794167	0.133179	52	20	4	2
	chr8	92082324	92082473	TRUE	8.11138e-28	2.30138e-29	0.668286	0.143846	70	25	6	2
	chr5	138534017	138534166	TRUE	8.13276e-28	2.30964e-29	0.944444	0.16789	45	24	3	1
	chr9	99801491	99801640	TRUE	8.44669e-28	2.40108e-29	0.834409	0.13488	63	31	4	2
	chr11	134123212	134123361	TRUE	8.53924e-28	2.4297e-29	0.721154	0.12512	71	26	5	2
	chr19	18314791	18314940	TRUE	8.62283e-28	2.45581e-29	0.795062	0.149231	64	27	4	2
	chr4	120375735	120375884	TRUE	8.6536e-28	2.46691e-29	1	0.152277	35	16	3	2
	chr19	58427930	58428079	TRUE	8.72113e-28	2.48852e-29	0.875	0.0953073	42	18	5	2
	chr4	53127	53276	TRUE	8.74658e-28	2.50051e-29	0.446565	0.124437	215	22	19	9
	chr17	72869108	72869257	TRUE	8.74658e-28	2.50044e-29	0.92	0.18592	45	25	4	1
	chr11	124670246	124670395	TRUE	9.27121e-28	2.653e-29	0.833333	0.168839	62	31	4	2
	chr19	6361363	6361512	TRUE	9.65157e-28	2.76445e-29	1	0.152773	35	16	4	2
	chr5	140070918	140071067	TRUE	1.03254e-27	2.96303e-29	0.815	0.121227	48	20	4	2
	chr5	140070923	140071072	TRUE	1.03254e-27	2.96303e-29	0.815	0.121227	48	20	4	2
	chr2	172290627	172290776	TRUE	1.17784e-27	3.38316e-29	0.965278	0.172791	43	24	2	1
	chr12	58087786	58087935	TRUE	1.22958e-27	3.53511e-29	0.923077	0.119681	40	13	6	3
	chr16	19535079	19535228	TRUE	1.23366e-27	3.55017e-29	0.870833	0.239958	73	20	7	3
	chr7	151216962	151217111	TRUE	1.29266e-27	3.72345e-29	0.859524	0.247094	72	14	10	5
	chr2	37458692	37458841	TRUE	1.34015e-27	3.86387e-29	0.82	0.159879	73	25	5	2
	chr1	68962751	68962900	TRUE	1.34843e-27	3.89866e-29	0.975	0.147647	37	20	3	1
	chr6	292001	292150	TRUE	1.34843e-27	3.89493e-29	0.752381	0.179003	77	35	4	2
	chr16	89883007	89883156	TRUE	1.34843e-27	3.89517e-29	0.932099	0.177002	46	27	2	1
	chr19	56904987	56905136	TRUE	1.39278e-27	4.03065e-29	0.743056	0.107529	59	24	5	2
	chr6	52926552	52926701	TRUE	1.47085e-27	4.26057e-29	0.847826	0.141087	53	23	3	2
	chr1	117041786	117041935	TRUE	1.50219e-27	4.35541e-29	0.666667	0.125719	85	22	7	3
	chr1	161087803	161087952	TRUE	1.53925e-27	4.46701e-29	0.725309	0.117878	61	27	4	2
	chr15	34394005	34394154	TRUE	1.54643e-27	4.49202e-29	0.974359	0.101606	31	13	2	2
	chr1	2323114	2323263	TRUE	1.54751e-27	4.49934e-29	0.923077	0.214512	54	26	3	2
	chr7	127292102	127292251	TRUE	1.5522e-27	4.5172e-29	0.946667	0.188523	45	25	3	1
	chr19	44576197	44576346	TRUE	1.55374e-27	4.52587e-29	0.72619	0.0886451	44	14	6	3
	chr6	31926816	31926965	TRUE	1.56387e-27	4.55959e-29	0.858025	0.121003	44	27	2	1
	chr14	68283254	68283403	TRUE	1.57916e-27	4.60843e-29	0.695614	0.125073	69	19	7	3
	chr4	5526783	5526932	TRUE	1.62191e-27	4.73758e-29	0.71565	0.101223	70	16	9	4
	chr9	37592588	37592737	TRUE	1.62633e-27	4.75488e-29	0.777814	0.164191	86	22	7	3
	chr5	122110650	122110799	TRUE	1.64373e-27	4.81021e-29	0.942308	0.137365	38	26	2	1
	chr17	35306075	35306224	TRUE	1.65912e-27	4.85973e-29	0.746528	0.204123	66	24	5	2
	chr12	14538147	14538296	TRUE	1.70696e-27	5.00446e-29	0.583186	0.153589	128	27	9	4
	chr19	48248708	48248857	TRUE	1.74818e-27	5.13003e-29	0.78323	0.216985	85	23	7	3
	chr5	112849310	112849459	TRUE	1.76331e-27	5.1792e-29	0.627976	0.131615	67	28	4	2
	chr7	86848983	86849132	TRUE	1.88336e-27	5.5369e-29	0.638889	0.0906778	57	24	4	2
	chr20	32274162	32274311	TRUE	1.9389e-27	5.70542e-29	0.92	0.185485	54	25	3	2
	chr7	99756290	99756439	TRUE	1.96389e-27	5.78426e-29	0.722682	0.143946	66	19	6	3
	chr2	169746896	169747045	TRUE	2.02492e-27	5.96948e-29	0.847917	0.12267	55	24	4	2
	chr9	684094	684243	TRUE	2.0276e-27	5.98287e-29	0.497332	0.125126	129	29	9	4
	chr20	19997837	19997986	TRUE	2.07672e-27	6.13341e-29	0.689103	0.134545	79	26	5	3
	chr19	58038593	58038742	TRUE	2.17185e-27	6.42024e-29	0.827451	0.0739666	38	17	3	2
	chr6	42952230	42952379	TRUE	2.19966e-27	6.5084e-29	0.880952	0.194091	53	21	3	2
	chr15	81282157	81282306	TRUE	2.19966e-27	6.51434e-29	0.765079	0.139238	65	21	6	3
	chr10	114206624	114206773	TRUE	2.2699e-27	6.7285e-29	0.779167	0.113737	55	20	4	2
	chr12	65153178	65153327	TRUE	2.29757e-27	6.81673e-29	0.921053	0.108197	36	19	3	1
	chr12	120242234	120242383	TRUE	2.35545e-27	6.9984e-29	0.806667	0.132897	62	25	4	2
	chr17	22023975	22024124	TRUE	2.35545e-27	7.00116e-29	0.491172	0.147483	109	6	34	18
	chr7	64838668	64838817	TRUE	2.35743e-27	7.01343e-29	0.778788	0.142274	69	22	6	3
	chr1	43996447	43996596	TRUE	2.47215e-27	7.3614e-29	0.772414	0.153737	66	29	4	2
	chr1	118148504	118148653	TRUE	2.47252e-27	7.36918e-29	0.819444	0.135762	48	24	3	2
	chr19	42388346	42388495	TRUE	2.51738e-27	7.5097e-29	0.858046	0.168478	67	29	4	2
	chr10	14880161	14880310	TRUE	2.52737e-27	7.54631e-29	0.824638	0.226186	72	23	5	3
	chr5	138210961	138211110	TRUE	2.56936e-27	7.67864e-29	0.70518	0.216349	122	19	12	6
	chr12	133464136	133464285	TRUE	2.62537e-27	7.85313e-29	0.9375	0.190741	50	32	3	1
	chr12	121019153	121019302	TRUE	2.65613e-27	7.95232e-29	0.916667	0.151668	42	20	4	2
	chr1	70671265	70671414	TRUE	2.71005e-27	8.12107e-29	0.736508	0.123588	55	21	4	2
	chr3	120315028	120315177	TRUE	2.75111e-27	8.25155e-29	0.686954	0.124897	67	16	8	4
	chr1	6639969	6640118	TRUE	2.78846e-27	8.3711e-29	0.719697	0.163626	66	22	5	3
	chr4	120987915	120988064	TRUE	2.7886e-27	8.37906e-29	0.889815	0.202498	61	18	4	3
	chr1	16939934	16940083	TRUE	2.81827e-27	8.47584e-29	0.503527	0.206417	168	27	12	6
	chr3	179065380	179065529	TRUE	2.88838e-27	8.6945e-29	0.711905	0.136104	59	18	5	3
	chr17	60005276	60005425	TRUE	2.96257e-27	8.92581e-29	0.712868	0.154479	85	21	7	4
	chr2	152266328	152266477	TRUE	3.1391e-27	9.46615e-29	0.866667	0.117777	45	20	4	2
	chr7	138144979	138145128	TRUE	3.21257e-27	9.69639e-29	0.977273	0.212874	45	22	4	2
	chr10	13203481	13203630	TRUE	3.37395e-27	1.01926e-28	0.901042	0.137168	42	16	3	2
	chr7	100210014	100210163	TRUE	3.55949e-27	1.07627e-28	0.664857	0.164693	94	25	8	3
	chr17	27467349	27467498	TRUE	3.73319e-27	1.1298e-28	0.582381	0.113766	80	35	4	2
	chr5	146258260	146258409	TRUE	3.75092e-27	1.13618e-28	0.961538	0.228353	47	26	2	1
	chr9	138392383	138392532	TRUE	3.89593e-27	1.18116e-28	0.942529	0.172199	47	29	3	1
	chr14	93799465	93799614	TRUE	4.12237e-27	1.25092e-28	0.839683	0.151851	58	21	5	2
	chr1	174992513	174992662	TRUE	4.12604e-27	1.25401e-28	0.733333	0.0842422	46	25	3	1
	chr2	197504256	197504405	TRUE	4.12604e-27	1.25427e-28	0.944444	0.128796	34	18	2	1
	chr10	38645208	38645357	TRUE	4.29417e-27	1.30654e-28	0.875	0.131129	41	20	4	2
	chr9	35103106	35103255	TRUE	4.29699e-27	1.30856e-28	1	0.109272	29	15	3	1
	chr12	49504632	49504781	TRUE	4.40195e-27	1.34171e-28	0.926923	0.165868	46	13	6	3
	chr5	146258279	146258428	TRUE	4.47237e-27	1.36438e-28	0.961538	0.22927	47	26	2	1
	chr10	29698383	29698532	TRUE	4.49871e-27	1.37363e-28	0.71576	0.120638	80	21	6	3
	chr3	125239010	125239159	TRUE	4.59296e-27	1.40365e-28	0.883333	0.15916	45	30	2	1
	chr19	17830203	17830352	TRUE	4.67001e-27	1.42846e-28	0.895833	0.12509	38	24	3	1
	chr10	15130727	15130876	TRUE	4.8635e-27	1.48896e-28	0.77381	0.0942267	41	28	2	1
	chr7	6523801	6523950	TRUE	4.97997e-27	1.52596e-28	0.703571	0.216465	125	27	9	4
	chr1	145610936	145611085	TRUE	5.00544e-27	1.53512e-28	0.8125	0.128575	52	24	4	2
	chr16	30441325	30441474	TRUE	5.1278e-27	1.57403e-28	0.892157	0.13993	40	17	4	2
	chr2	73460308	73460457	TRUE	5.32721e-27	1.63668e-28	0.966667	0.106099	31	15	3	2
	chr9	131451409	131451558	TRUE	5.37243e-27	1.65203e-28	0.943452	0.173574	47	28	3	1
	chr19	12886386	12886535	TRUE	5.61006e-27	1.72661e-28	0.655357	0.159318	84	28	5	3
	chr10	85899085	85899234	TRUE	5.69323e-27	1.75375e-28	0.745098	0.152082	46	17	4	2
	chr3	143567241	143567390	TRUE	5.77022e-27	1.77903e-28	0.47051	0.126201	161	18	17	8
	chr3	11685350	11685499	TRUE	5.89588e-27	1.81936e-28	0.750397	0.223293	116	36	6	3
	chr17	30228681	30228830	TRUE	6.02156e-27	1.85977e-28	0.953333	0.104892	33	15	4	2
	chr13	20357035	20357184	TRUE	6.02161e-27	1.86142e-28	0.73254	0.172659	80	27	6	2
	chr8	28747431	28747580	TRUE	6.08728e-27	1.88336e-28	0.793197	0.12375	58	14	8	4
	chr5	156569738	156569887	TRUE	6.14422e-27	1.90264e-28	0.802083	0.100146	47	24	3	1
	chr20	44441155	44441304	TRUE	6.14476e-27	1.90446e-28	0.622272	0.149521	75	24	6	3
	chr17	73780709	73780858	TRUE	6.22989e-27	1.93253e-28	0.792	0.17876	74	25	6	2
	chr5	64858947	64859096	TRUE	6.35319e-27	1.9725e-28	0.804861	0.138941	66	24	5	2
	chr11	34460378	34460527	TRUE	6.60331e-27	2.05194e-28	0.933333	0.162668	43	20	3	2
	chr6	18387494	18387643	TRUE	6.68314e-27	2.07855e-28	0.725	0.0931652	49	30	3	1
	chr5	60240934	60241083	TRUE	6.78867e-27	2.11321e-28	0.763889	0.122482	49	18	4	2
	chr12	49961863	49962012	TRUE	6.87664e-27	2.14245e-28	0.665	0.120936	54	20	5	2
	chr9	37592546	37592695	TRUE	7.03697e-27	2.1943e-28	0.685818	0.145935	100	23	9	4
	chr21	30396838	30396987	TRUE	7.03769e-27	2.19643e-28	0.697751	0.11432	69	18	6	3
	chr14	55493744	55493893	TRUE	7.0516e-27	2.20267e-28	0.84127	0.146211	45	21	4	2
	chr7	100034046	100034195	TRUE	7.25146e-27	2.26706e-28	0.812963	0.171193	63	18	8	3
	chr11	108093459	108093608	TRUE	7.30184e-27	2.28478e-28	0.87963	0.182108	61	18	6	3
	chr13	22178259	22178408	TRUE	7.45622e-27	2.3351e-28	0.904762	0.165029	52	28	3	1
	chr20	10414818	10414967	TRUE	7.61893e-27	2.38812e-28	0.787356	0.132459	56	29	3	1
	chr12	56211458	56211607	TRUE	8.28454e-27	2.59899e-28	0.837963	0.114685	44	18	5	2
	chr11	117198504	117198653	TRUE	8.41757e-27	2.643e-28	0.757937	0.152647	65	21	6	3
	chr2	223725632	223725781	TRUE	8.57711e-27	2.69541e-28	1	0.112029	29	29	1	1
	chr7	135194803	135194952	TRUE	8.58394e-27	2.69988e-28	0.862879	0.21995	72	22	6	3
	chr1	40349129	40349278	TRUE	8.76923e-27	2.76053e-28	0.864583	0.103733	44	24	2	1
	chr7	73256807	73256956	TRUE	8.91194e-27	2.80786e-28	0.758271	0.159427	51	19	5	2
	chr7	102987989	102988138	TRUE	9.56033e-27	3.01473e-28	0.564052	0.147329	147	17	16	8
	chr8	82598512	82598661	TRUE	9.77901e-27	3.08633e-28	0.806818	0.143486	56	22	5	2
	chr5	148442689	148442838	TRUE	9.92899e-27	3.13635e-28	0.842262	0.129775	50	28	3	1
	chr2	120124356	120124505	TRUE	1.04822e-26	3.31647e-28	0.904762	0.120864	37	21	2	1
	chr7	150924269	150924418	TRUE	1.04822e-26	3.31676e-28	0.835	0.123916	49	20	4	2
	chr19	23456984	23457133	TRUE	1.04992e-26	3.32497e-28	0.811404	0.117889	48	19	4	2
	chr3	156534754	156534903	TRUE	1.09837e-26	3.48435e-28	0.719048	0.150784	68	35	3	1
	chr20	2644795	2644944	TRUE	1.09837e-26	3.48261e-28	0.776042	0.130118	50	16	6	3
	chr16	838522	838671	TRUE	1.09845e-26	3.48756e-28	0.878333	0.254864	81	30	4	2
	chr20	35374433	35374582	TRUE	1.11565e-26	3.5452e-28	0.857843	0.200247	66	34	3	1
	chr1	217804361	217804510	TRUE	1.12213e-26	3.56883e-28	0.746491	0.107586	53	19	5	2
	chr10	104005209	104005358	TRUE	1.12461e-26	3.57974e-28	0.727198	0.263346	121	26	9	4
	chr1	6639956	6640105	TRUE	1.12584e-26	3.58671e-28	0.706349	0.163231	65	21	5	3
	chr1	182758772	182758921	TRUE	1.12707e-26	3.59366e-28	0.87619	0.167279	50	35	3	1
	chr1	241683006	241683155	TRUE	1.13512e-26	3.6224e-28	0.860317	0.166538	58	21	5	2
	chr5	43120885	43121034	TRUE	1.1686e-26	3.7324e-28	0.865385	0.129395	48	26	2	1
	chr5	140027192	140027341	TRUE	1.17457e-26	3.75464e-28	0.982456	0.141221	35	19	3	1
	chr9	82186778	82186927	TRUE	1.25459e-26	4.01381e-28	0.776548	0.246729	90	20	9	4
	chr14	55493759	55493908	TRUE	1.26388e-26	4.04695e-28	0.858333	0.149375	43	20	4	2
	chr12	109458797	109458946	TRUE	1.27446e-26	4.08429e-28	0.898485	0.14172	48	22	3	2
	chr19	19249219	19249368	TRUE	1.27606e-26	4.09285e-28	0.753846	0.122893	54	13	6	4
	chr5	148724877	148725026	TRUE	1.31316e-26	4.2154e-28	0.90625	0.122978	35	16	4	2
	chr1	53704159	53704308	TRUE	1.34694e-26	4.32747e-28	0.8	0.126226	58	20	5	2
	chr11	68671255	68671404	TRUE	1.36144e-26	4.37775e-28	0.74537	0.108159	53	18	5	2
	chr9	74526100	74526249	TRUE	1.37026e-26	4.40979e-28	0.912037	0.177665	47	18	5	2
	chr14	77787606	77787755	TRUE	1.3746e-26	4.42747e-28	0.770858	0.249644	103	32	6	3
	chr1	25071748	25071897	TRUE	1.38602e-26	4.46802e-28	0.861111	0.215499	83	30	5	2
	chr11	107798971	107799120	TRUE	1.48868e-26	4.80296e-28	0.692	0.131454	64	25	4	2
	chr2	170550875	170551024	TRUE	1.51242e-26	4.88365e-28	0.884	0.109196	41	25	3	1
	chr3	100053468	100053617	TRUE	1.59631e-26	5.15885e-28	0.885417	0.10092	36	16	3	2
	chr7	150754948	150755097	TRUE	1.62015e-26	5.24028e-28	0.678251	0.177052	101	26	7	3
	chr14	36278384	36278533	TRUE	1.65884e-26	5.3699e-28	0.852381	0.206851	69	21	6	3
	chr21	30257645	30257794	TRUE	1.71105e-26	5.54352e-28	0.555617	0.183928	158	26	11	6
	chr11	14380681	14380830	TRUE	1.71242e-26	5.55258e-28	0.890625	0.241148	64	32	3	2
	chr22	19132142	19132291	TRUE	1.73962e-26	5.64549e-28	0.828788	0.157734	60	22	5	2
	chr2	11606249	11606398	TRUE	1.74386e-26	5.66396e-28	0.9	0.183535	50	25	3	2
	chr6	26659915	26660064	TRUE	1.8165e-26	5.90481e-28	0.916667	0.157916	44	19	4	2
	chr12	110486278	110486427	TRUE	1.92833e-26	6.27352e-28	0.747778	0.127347	58	15	5	3
	chr12	105379998	105380147	TRUE	1.97047e-26	6.41594e-28	0.770175	0.120242	60	19	5	3
	chr4	84376896	84377045	TRUE	2.0363e-26	6.63893e-28	0.787037	0.0978426	46	18	5	2
	chr12	123459704	123459853	TRUE	2.0363e-26	6.64132e-28	0.888636	0.163145	49	22	3	2
	chr17	28804326	28804475	TRUE	2.06051e-26	6.72583e-28	0.805556	0.12597	56	24	4	2
	chr6	20534588	20534737	TRUE	2.24345e-26	7.32906e-28	0.620491	0.120236	88	15	12	5
	chr21	35445723	35445872	TRUE	2.29615e-26	7.50742e-28	0.826923	0.198036	63	26	4	2
	chr8	107738289	107738438	TRUE	2.31139e-26	7.56349e-28	0.633102	0.126362	88	12	14	7
	chr11	67374311	67374460	TRUE	2.3651e-26	7.74563e-28	0.912037	0.197089	47	18	4	2
	chr1	154155677	154155826	TRUE	2.42841e-26	7.96668e-28	0.866667	0.182895	45	15	5	3
	chr1	168148071	168148220	TRUE	2.42841e-26	7.96994e-28	0.772436	0.126092	61	26	4	2
	chr3	50606483	50606632	TRUE	2.42841e-26	7.97264e-28	0.716667	0.118481	66	22	5	3
	chr1	220263143	220263292	TRUE	2.44217e-26	8.02442e-28	0.737382	0.108065	79	17	9	4
	chr2	44588896	44589045	TRUE	2.46788e-26	8.11556e-28	0.838333	0.151227	53	20	5	2
	chr19	42580190	42580339	TRUE	2.60852e-26	8.5851e-28	0.943056	0.211597	54	24	4	2
	chr2	3605892	3606041	TRUE	2.69141e-26	8.86518e-28	0.980392	0.104202	30	17	3	1
	chr5	134094361	134094510	TRUE	2.7511e-26	9.06923e-28	0.821429	0.151385	64	28	4	2
	chr10	8095399	8095548	TRUE	2.8061e-26	9.25813e-28	0.921739	0.243522	59	23	4	2
	chr6	34393744	34393893	TRUE	2.84109e-26	9.38124e-28	0.891304	0.102529	34	23	2	1
	chr7	127225606	127225755	TRUE	2.88616e-26	9.53786e-28	0.743827	0.112964	60	27	4	2
	chr20	44539537	44539686	TRUE	2.94445e-26	9.73844e-28	0.463344	0.0956075	73	19	9	3
	chr6	30614701	30614850	TRUE	3.09771e-26	1.02571e-27	0.591398	0.137021	92	31	5	2
	chr7	73668690	73668839	TRUE	3.09771e-26	1.02621e-27	0.80303	0.139108	49	22	4	2
	chr7	99716931	99717080	TRUE	3.2267e-26	1.06981e-27	0.650147	0.130751	136	27	10	5
	chr5	139493608	139493757	TRUE	3.36141e-26	1.11538e-27	0.804545	0.155353	61	33	4	1
	chr17	73937071	73937220	TRUE	3.37502e-26	1.12081e-27	0.888889	0.160516	44	24	3	1
	chr13	27998581	27998730	TRUE	3.40009e-26	1.13006e-27	0.783333	0.116421	54	30	3	1
	chr22	18560586	18560735	TRUE	3.40456e-26	1.13246e-27	0.845238	0.1824	60	21	5	2
	chr12	69080631	69080780	TRUE	3.46115e-26	1.15222e-27	0.768421	0.136279	54	19	5	2
	chr11	60674008	60674157	TRUE	3.50781e-26	1.1687e-27	0.787879	0.177084	63	22	5	2
	chr9	136890489	136890638	TRUE	3.56383e-26	1.18833e-27	0.903226	0.170083	43	31	2	1
	chr1	153606425	153606574	TRUE	3.6521e-26	1.21875e-27	0.883333	0.153739	43	20	4	2
	chr7	98972229	98972378	TRUE	3.72614e-26	1.24446e-27	0.796296	0.152213	49	18	3	2
	chr7	55955062	55955211	TRUE	3.77193e-26	1.26077e-27	0.616314	0.104811	91	27	6	3
	chr19	11546169	11546318	TRUE	3.87842e-26	1.29742e-27	0.971429	0.158421	39	14	6	2
	chr11	62473768	62473917	TRUE	4.0304e-26	1.34935e-27	0.85	0.167049	63	22	4	2
	chr1	213224497	213224646	TRUE	4.06843e-26	1.36318e-27	0.772989	0.106707	57	29	3	1
	chr7	64254706	64254855	TRUE	4.13264e-26	1.38581e-27	0.67131	0.134163	88	20	8	4
	chr12	50135193	50135342	TRUE	4.14468e-26	1.39097e-27	0.897368	0.171927	52	19	6	2
	chr1	145438362	145438511	TRUE	4.23367e-26	1.42198e-27	0.806667	0.194519	64	25	5	2
	chr9	97021502	97021651	TRUE	4.31902e-26	1.45181e-27	0.829167	0.11031	46	16	6	2
	chr19	2269420	2269569	TRUE	4.52905e-26	1.52437e-27	0.685484	0.164389	97	31	5	3
	chr19	49127549	49127698	TRUE	4.52905e-26	1.52486e-27	0.921569	0.179598	51	17	5	3
	chr17	78518525	78518674	TRUE	4.72457e-26	1.59196e-27	0.712963	0.0985936	60	18	6	3
	chr6	37225448	37225597	TRUE	5.00453e-26	1.68765e-27	0.905797	0.14016	43	23	3	1
	chr4	83821737	83821886	TRUE	5.15023e-26	1.73818e-27	0.869565	0.172809	52	23	4	2
	chr16	58533947	58534096	TRUE	5.16952e-26	1.74608e-27	0.816	0.178932	65	25	5	2
	chr18	32621291	32621440	TRUE	5.2225e-26	1.76539e-27	0.814015	0.149523	65	22	5	2
	chr17	76836921	76837070	TRUE	5.22513e-26	1.76769e-27	0.916667	0.169509	45	18	5	2
	chr19	24097604	24097753	TRUE	5.3973e-26	1.82739e-27	0.797619	0.116079	52	21	4	2
	chr1	101360370	101360519	TRUE	5.45808e-26	1.84945e-27	0.693915	0.118666	78	18	9	4
	chr10	43048208	43048357	TRUE	5.47779e-26	1.8576e-27	0.707602	0.130688	58	19	5	3
	chr7	66767358	66767507	TRUE	5.50917e-26	1.86973e-27	0.793651	0.148784	54	21	4	2
	chr2	239228982	239229131	TRUE	5.81309e-26	1.97445e-27	0.958333	0.191016	43	24	2	1
	chr17	17875736	17875885	TRUE	5.84667e-26	1.98744e-27	0.833333	0.160585	54	23	4	2
	chr19	37096116	37096265	TRUE	5.94694e-26	2.02313e-27	0.825362	0.121771	58	23	4	2
	chr13	47127203	47127352	TRUE	6.04304e-26	2.05745e-27	0.882716	0.195722	51	27	3	1
	chr13	53422726	53422875	TRUE	6.14852e-26	2.09503e-27	0.65	0.144178	87	26	7	3
	chr2	91847950	91848099	TRUE	6.24939e-26	2.13109e-27	0.666508	0.1383	98	30	6	3
	chr20	5107220	5107369	TRUE	6.3579e-26	2.16981e-27	0.723485	0.161719	76	22	7	3
	chr3	23958489	23958638	TRUE	6.35932e-26	2.17201e-27	0.893939	0.200563	54	22	4	2
	chr7	124569989	124570138	TRUE	6.42892e-26	2.19752e-27	0.840616	0.136312	50	17	7	2
	chr10	69597889	69598038	TRUE	6.70227e-26	2.29277e-27	0.564195	0.101742	108	13	17	8
	chr14	53173818	53173967	TRUE	6.764e-26	2.31571e-27	0.813333	0.150354	56	20	5	2
	chr3	64211083	64211232	TRUE	6.78322e-26	2.32412e-27	0.807738	0.201886	75	28	5	2
	chr3	67048631	67048780	TRUE	6.87545e-26	2.35758e-27	0.867367	0.168414	61	17	6	3
	chr5	139554553	139554702	TRUE	6.89687e-26	2.36679e-27	0.775862	0.144525	69	29	4	2
	chr12	54674388	54674537	TRUE	7.71555e-26	2.64982e-27	0.864048	0.266331	77	20	8	3
	chr12	58005118	58005267	TRUE	7.91278e-26	2.7197e-27	0.908046	0.127981	41	29	3	1
	chr15	56209281	56209430	TRUE	8.03123e-26	2.76258e-27	0.539099	0.145909	136	17	16	8
	chr13	93878995	93879144	TRUE	8.03742e-26	2.76688e-27	0.764881	0.146149	57	14	7	4
	chr4	122791594	122791743	TRUE	8.07103e-26	2.78063e-27	0.913043	0.210147	48	23	3	2
	chr7	99063760	99063909	TRUE	8.50199e-26	2.9314e-27	0.578662	0.152043	129	22	12	5
	chr7	23221386	23221535	TRUE	8.91491e-26	3.07618e-27	0.534016	0.0893138	78	13	12	6
	chr9	94124158	94124307	TRUE	9.38392e-26	3.24055e-27	0.886667	0.156032	47	25	3	1
	chr1	228296965	228297114	TRUE	9.47882e-26	3.27589e-27	0.9375	0.109026	30	16	2	1
	chr2	211341434	211341583	TRUE	9.68213e-26	3.34877e-27	0.905556	0.129065	43	12	6	3
	chr5	122759204	122759353	TRUE	9.75463e-26	3.37648e-27	0.681389	0.189894	128	30	8	4
	chr19	15890749	15890898	TRUE	9.9517e-26	3.44738e-27	0.751417	0.110394	49	14	7	3
	chr2	55746640	55746789	TRUE	9.96263e-26	3.45386e-27	0.866071	0.135871	42	16	5	2
	chr22	45608299	45608448	TRUE	1.00438e-25	3.4847e-27	0.688889	0.14037	81	27	5	3
	chr5	132362192	132362341	TRUE	1.02747e-25	3.56762e-27	0.850529	0.122305	51	18	5	2
	chr7	86781547	86781696	TRUE	1.04845e-25	3.64327e-27	0.695417	0.116051	77	20	7	3
	chr3	14166323	14166472	TRUE	1.06521e-25	3.7044e-27	0.8125	0.136634	46	24	3	1
	chr17	73851453	73851602	TRUE	1.08791e-25	3.78627e-27	0.933333	0.155257	38	15	5	2
	chr5	140855469	140855618	TRUE	1.09731e-25	3.82196e-27	0.651896	0.141889	97	27	7	3
	chr3	61547145	61547294	TRUE	1.16645e-25	4.06595e-27	0.954	0.292222	66	25	5	2
	chr1	85527907	85528056	TRUE	1.17547e-25	4.10054e-27	0.57403	0.13475	70	18	8	3
	chr4	15656965	15657114	TRUE	1.17837e-25	4.11386e-27	0.835556	0.259852	73	30	4	2
	chr2	152214005	152214154	TRUE	1.19057e-25	4.15965e-27	0.56456	0.106439	95	13	14	7
	chr1	155243233	155243382	TRUE	1.21224e-25	4.23863e-27	0.731481	0.147608	57	27	4	2
	chr17	40273334	40273483	TRUE	1.22229e-25	4.2771e-27	0.792	0.183183	69	25	5	2
	chr10	127408014	127408163	TRUE	1.23004e-25	4.31419e-27	0.921569	0.153222	40	17	4	2
	chr11	63741979	63742128	TRUE	1.23004e-25	4.31122e-27	0.778986	0.126128	55	23	4	2
	chr19	19030394	19030543	TRUE	1.23004e-25	4.31079e-27	0.970175	0.226372	50	19	5	2
	chr7	72992965	72993114	TRUE	1.2497e-25	4.38652e-27	0.857639	0.18229	55	24	3	2
	chr21	40817683	40817832	TRUE	1.27455e-25	4.47717e-27	0.703333	0.177343	91	30	6	3
	chr4	104020976	104021125	TRUE	1.33808e-25	4.70397e-27	0.635053	0.143336	91	18	9	5
	chr17	8093516	8093665	TRUE	1.35127e-25	4.75397e-27	0.817778	0.265709	74	15	8	4
	chr10	88281448	88281597	TRUE	1.42431e-25	5.01481e-27	0.911765	0.166767	44	17	4	2
	chr16	46655263	46655412	TRUE	1.46542e-25	5.16349e-27	0.656857	0.143247	83	25	6	3
	chr11	76155642	76155791	TRUE	1.48783e-25	5.24649e-27	0.729167	0.109734	52	24	4	2
	chr12	7079894	7080043	TRUE	1.52208e-25	5.37137e-27	0.789216	0.144596	47	17	5	2
	chr16	71264551	71264700	TRUE	1.52528e-25	5.38678e-27	0.677419	0.0850236	46	31	3	1
	chr1	109756501	109756650	TRUE	1.56105e-25	5.52091e-27	0.645139	0.121843	75	24	6	3
	chr17	34842373	34842522	TRUE	1.56105e-25	5.52155e-27	0.816667	0.158704	55	24	5	2
	chr1	151254357	151254506	TRUE	1.57211e-25	5.5649e-27	0.708642	0.208707	91	27	6	3
	chr16	90038888	90039037	TRUE	1.58332e-25	5.60889e-27	0.736111	0.110066	47	24	3	1
	chr2	70520821	70520970	TRUE	1.60241e-25	5.68082e-27	0.826852	0.171627	61	18	6	3
	chr22	31688426	31688575	TRUE	1.60583e-25	5.6973e-27	0.848765	0.274655	78	27	5	2
	chr2	71558789	71558938	TRUE	1.65753e-25	5.88967e-27	0.610119	0.0866921	77	28	4	2
	chr10	45474282	45474431	TRUE	1.65753e-25	5.8862e-27	0.880201	0.194677	61	19	5	3
	chr11	93517305	93517454	TRUE	1.73591e-25	6.17289e-27	0.785154	0.112164	49	17	5	2
	chr19	19932512	19932661	TRUE	1.75691e-25	6.25231e-27	0.73913	0.164261	67	23	5	2
	chr4	84205916	84206065	TRUE	1.80376e-25	6.42388e-27	0.712333	0.23907	100	25	7	4
	chr5	175815492	175815641	TRUE	1.88825e-25	6.7299e-27	0.64581	0.150279	105	25	8	4
	chr19	50169066	50169215	TRUE	1.89203e-25	6.74849e-27	0.805333	0.225703	79	25	6	3
	chr9	123555621	123555770	TRUE	1.90642e-25	6.80497e-27	0.848485	0.102263	35	22	2	1
	chr6	43149822	43149971	TRUE	1.93859e-25	6.92505e-27	0.787879	0.165813	48	22	3	2
	chr10	101945766	101945915	TRUE	1.9476e-25	6.96247e-27	0.96	0.137131	33	25	2	1
	chr20	36322334	36322483	TRUE	1.95407e-25	6.99089e-27	0.786232	0.143388	63	23	4	2
	chr7	128116683	128116832	TRUE	1.97985e-25	7.08845e-27	0.944048	0.14006	38	14	6	2
	chr9	96213798	96213947	TRUE	2.02235e-25	7.24608e-27	0.888889	0.1524	46	21	3	2
	chr6	37400913	37401062	TRUE	2.05332e-25	7.36259e-27	0.845238	0.126824	46	21	3	2
	chr2	75873809	75873958	TRUE	2.07438e-25	7.44372e-27	0.702381	0.0929323	39	21	2	1
	chr22	40766495	40766644	TRUE	2.09031e-25	7.50655e-27	0.85119	0.1457	45	14	3	3
	chr7	5229735	5229884	TRUE	2.17961e-25	7.83312e-27	0.958333	0.142485	36	16	3	2
	chr1	43855456	43855605	TRUE	2.20484e-25	7.92976e-27	0.85641	0.124825	40	13	6	3
	chr22	20861786	20861935	TRUE	2.20761e-25	7.94568e-27	0.975	0.142545	36	20	2	1
	chr1	55181429	55181578	TRUE	2.22213e-25	8.00396e-27	0.710595	0.141631	71	20	5	3
	chr17	80250642	80250791	TRUE	2.24707e-25	8.09984e-27	0.952381	0.0958672	28	21	2	1
	chr17	28443734	28443883	TRUE	2.26451e-25	8.16883e-27	0.891176	0.10326	44	17	5	2
	chr2	242295611	242295760	TRUE	2.29841e-25	8.29732e-27	0.961538	0.197906	43	26	3	1
	chr7	44621761	44621910	TRUE	2.30413e-25	8.32421e-27	0.687478	0.194262	105	27	8	3
	chr8	30945060	30945209	TRUE	2.31694e-25	8.37674e-27	0.480844	0.112092	142	22	13	6
	chr20	34129678	34129827	TRUE	2.37319e-25	8.58654e-27	0.785714	0.134031	56	28	4	2
	chr16	14927543	14927692	TRUE	2.37989e-25	8.61722e-27	0.892857	0.172318	55	28	3	1
	chr16	23568762	23568911	TRUE	2.41714e-25	8.75861e-27	0.777564	0.145608	65	26	5	2
	chr1	36348710	36348859	TRUE	2.46798e-25	8.94948e-27	0.808333	0.114566	44	20	2	2
	chr12	102513856	102514005	TRUE	2.47817e-25	8.99314e-27	0.7825	0.105435	46	20	4	2
	chr19	7660688	7660837	TRUE	2.54685e-25	9.24926e-27	0.774194	0.0839957	44	31	2	1
	chr14	102829278	102829427	TRUE	2.64152e-25	9.60735e-27	0.660345	0.169813	87	29	4	3
	chr19	39926570	39926719	TRUE	2.64152e-25	9.60698e-27	0.833333	0.146649	45	26	3	1
	chr3	183873184	183873333	TRUE	2.68479e-25	9.77199e-27	0.948718	0.175317	40	13	3	3
	chr11	124670251	124670400	TRUE	2.74651e-25	1.0004e-26	0.801075	0.173728	61	31	4	1
	chr7	99036371	99036520	TRUE	2.7868e-25	1.01583e-26	0.857143	0.146865	45	21	4	2
	chr17	56769863	56770012	TRUE	2.79257e-25	1.01869e-26	0.651786	0.0939168	67	28	4	2
	chr2	32390833	32390982	TRUE	2.88644e-25	1.05449e-26	0.895455	0.173109	55	22	4	2
	chr11	4629389	4629538	TRUE	2.88644e-25	1.05409e-26	0.860119	0.133778	45	28	2	1
	chr1	224544495	224544644	TRUE	2.88817e-25	1.05591e-26	0.758772	0.123245	54	19	5	2
	chr19	56905002	56905151	TRUE	2.95057e-25	1.07952e-26	0.689103	0.110399	66	26	5	2
	chr7	14029276	14029425	TRUE	2.96283e-25	1.0848e-26	0.710317	0.204564	95	18	10	5
	chr9	102668835	102668984	TRUE	2.97982e-25	1.09183e-26	0.693103	0.12009	68	29	3	2
	chr13	50018173	50018322	TRUE	3.00965e-25	1.10357e-26	0.828947	0.147186	45	19	4	2
	chr7	100472601	100472750	TRUE	3.04746e-25	1.11826e-26	0.842105	0.164307	63	19	7	3
	chr3	114343744	114343893	TRUE	3.07207e-25	1.12812e-26	0.872778	0.155256	54	15	6	3
	chr1	55181441	55181590	TRUE	3.14651e-25	1.15716e-26	0.676757	0.136622	73	21	5	3
	chr16	90038894	90039043	TRUE	3.14651e-25	1.1565e-26	0.746377	0.11059	45	23	4	1
	chr10	124639109	124639258	TRUE	3.34663e-25	1.23165e-26	0.740741	0.127869	53	27	4	1
	chr12	49412544	49412693	TRUE	3.37322e-25	1.24235e-26	0.931481	0.163361	43	18	4	2
	chr1	44820891	44821040	TRUE	3.49552e-25	1.28834e-26	0.858696	0.0995861	38	23	3	1
	chr8	125486756	125486905	TRUE	3.53337e-25	1.30324e-26	0.824	0.168405	58	25	4	2
	chr3	49893944	49894093	TRUE	3.61385e-25	1.33391e-26	0.904762	0.112489	32	14	4	2
	chr17	25621006	25621155	TRUE	3.75536e-25	1.38715e-26	0.772727	0.116011	44	22	3	2
	chr16	3550863	3551012	TRUE	3.76097e-25	1.39024e-26	0.912037	0.135095	37	18	3	2
	chr20	49126791	49126940	TRUE	3.82549e-25	1.41512e-26	0.872667	0.161792	53	25	4	2
	chr11	18655972	18656121	TRUE	3.85866e-25	1.42844e-26	0.848485	0.134884	45	22	4	2
	chr17	27230041	27230190	TRUE	3.86343e-25	1.43125e-26	0.74023	0.15152	76	29	4	2
	chr1	210001233	210001382	TRUE	4.16446e-25	1.54389e-26	0.730952	0.0981837	51	18	5	2
	chr1	27816621	27816770	TRUE	4.24197e-25	1.57377e-26	0.865385	0.186232	46	26	3	1
	chr1	213224553	213224702	TRUE	4.26546e-25	1.58364e-26	0.739899	0.114779	62	33	3	1
	chr1	150552088	150552237	TRUE	4.35242e-25	1.61711e-26	0.909091	0.166546	41	22	3	1
	chr2	220363529	220363678	TRUE	4.3651e-25	1.62299e-26	0.803361	0.204656	62	17	6	3
	chr2	45838355	45838504	TRUE	4.41519e-25	1.64281e-26	0.933333	0.169797	39	15	4	2
	chr14	90863273	90863422	TRUE	4.6605e-25	1.73535e-26	0.97619	0.115506	30	14	2	2
	chr1	47184688	47184837	TRUE	4.68382e-25	1.7453e-26	0.824713	0.175822	61	29	4	2
	chr8	144373459	144373608	TRUE	4.76525e-25	1.77692e-26	0.956522	0.124126	31	23	2	1
	chr4	109541505	109541654	TRUE	4.88957e-25	1.82461e-26	0.745833	0.0822544	54	16	6	3
	chr19	46850194	46850343	TRUE	4.92447e-25	1.83896e-26	1	0.12959	29	18	2	1
	chr4	142141949	142142098	TRUE	4.97471e-25	1.85906e-26	0.7125	0.0998364	48	20	4	2
	chr7	130353550	130353699	TRUE	5.03008e-25	1.88112e-26	0.83908	0.210463	65	29	3	2
	chr11	62559438	62559587	TRUE	5.25886e-25	1.96809e-26	0.923611	0.10554	33	24	2	1
	chr7	129710249	129710398	TRUE	5.29194e-25	1.98191e-26	0.788889	0.136827	47	15	6	3
	chr6	43484691	43484840	TRUE	5.31243e-25	1.99101e-26	0.778571	0.138829	51	14	7	3
	chr3	72937285	72937434	TRUE	5.33209e-25	1.99982e-26	0.463333	0.100593	132	40	7	3
	chr17	42767117	42767266	TRUE	5.33438e-25	2.00212e-26	0.593011	0.122752	94	31	6	3
	chr16	790949	791098	TRUE	5.39227e-25	2.02531e-26	0.766667	0.157818	72	29	5	2
	chr9	135753650	135753799	TRUE	5.41098e-25	2.0338e-26	0.78125	0.141331	55	24	5	2
	chr4	7069752	7069901	TRUE	5.50884e-25	2.07207e-26	0.811594	0.12389	45	23	3	1
	chr13	24463494	24463643	TRUE	5.54868e-25	2.08855e-26	0.924691	0.230065	64	27	4	2
	chr19	58071180	58071329	TRUE	5.57018e-25	2.09815e-26	0.921053	0.142816	42	19	4	2
	chr7	149535409	149535558	TRUE	5.58682e-25	2.10593e-26	0.719762	0.176289	81	20	8	4
	chr17	43239184	43239333	TRUE	5.74938e-25	2.16876e-26	0.70977	0.255694	101	29	6	3
	chr20	13765582	13765731	TRUE	5.79234e-25	2.18653e-26	0.620988	0.128995	85	27	6	3
	chr15	80364825	80364974	TRUE	5.79477e-25	2.18901e-26	0.619325	0.137924	84	10	16	8
	chr16	74330581	74330730	TRUE	5.84592e-25	2.20991e-26	0.916667	0.121419	35	16	4	2
	chr6	42981877	42982026	TRUE	5.92535e-25	2.24183e-26	0.859848	0.17639	59	22	5	2
	chr22	50683352	50683501	TRUE	5.92535e-25	2.24314e-26	0.712	0.17316	66	25	5	2
	chr21	37692406	37692555	TRUE	5.93089e-25	2.24684e-26	0.72381	0.166878	72	21	6	3
	chr6	56954728	56954877	TRUE	6.10892e-25	2.31594e-26	0.894737	0.121318	37	19	3	1
	chr17	79849414	79849563	TRUE	6.13243e-25	2.3265e-26	0.882576	0.13741	47	22	3	2
	chr12	49075987	49076136	TRUE	6.14989e-25	2.33479e-26	0.977273	0.176518	37	22	3	1
	chr6	43027111	43027260	TRUE	6.23881e-25	2.37024e-26	0.804348	0.0855347	39	23	3	1
	chr13	24463511	24463660	TRUE	6.3277e-25	2.40572e-26	0.966667	0.242006	51	22	4	2
	chr2	32236057	32236206	TRUE	6.33823e-25	2.41143e-26	0.768817	0.198285	82	31	4	2
	chr2	172750685	172750834	TRUE	6.36803e-25	2.42449e-26	0.656076	0.118744	84	29	5	2
	chr1	90460578	90460727	TRUE	6.37541e-25	2.42902e-26	0.958333	0.13921	35	24	2	1
	chr22	32058153	32058302	TRUE	6.65567e-25	2.5376e-26	0.833333	0.114722	38	16	4	2
	chr3	169940120	169940269	TRUE	6.96057e-25	2.65573e-26	0.813333	0.159134	56	25	4	2
	chr7	112579884	112580033	TRUE	7.04393e-25	2.68944e-26	0.795833	0.182929	58	24	4	2
	chr13	49822003	49822152	TRUE	7.61646e-25	2.91009e-26	0.880952	0.123053	41	21	3	1
	chr2	46925999	46926148	TRUE	7.63102e-25	2.91772e-26	0.954545	0.148161	36	22	3	1
	chr6	33386017	33386166	TRUE	7.67963e-25	2.93838e-26	0.891304	0.203472	48	23	4	2
	chr7	1200028	1200177	TRUE	7.70365e-25	2.94965e-26	0.786111	0.179572	67	30	4	2
	chr12	110337979	110338128	TRUE	7.82144e-25	2.99687e-26	0.73141	0.13898	63	26	4	2
	chr13	41706874	41707023	TRUE	7.82356e-25	2.99979e-26	0.916667	0.200941	50	26	3	1
	chr15	85923771	85923920	TRUE	7.86924e-25	3.01943e-26	0.854839	0.164548	51	31	3	1
	chr11	47198371	47198520	TRUE	7.92668e-25	3.04361e-26	1	0.122657	28	18	2	1
	chr12	56367762	56367911	TRUE	7.95377e-25	3.05617e-26	0.797101	0.223015	69	23	5	3
	chr1	151762962	151763111	TRUE	7.95721e-25	3.05964e-26	0.801282	0.126504	47	13	5	3
	chr17	16557110	16557259	TRUE	8.22977e-25	3.16667e-26	0.69	0.177473	103	35	5	2
	chr1	204797723	204797872	TRUE	8.39588e-25	3.23285e-26	0.738095	0.115732	57	28	3	2
	chr3	182982990	182983139	TRUE	8.44573e-25	3.25433e-26	0.520833	0.110702	109	24	9	4
	chr4	119809896	119810045	TRUE	8.45074e-25	3.25854e-26	0.659259	0.0817752	58	27	3	2
	chr3	9291263	9291412	TRUE	8.52598e-25	3.28986e-26	0.784722	0.201343	71	24	6	2
	chr14	78083062	78083211	TRUE	8.6147e-25	3.32642e-26	0.815741	0.189721	61	18	6	3
	chr9	19380187	19380336	TRUE	8.63543e-25	3.33676e-26	0.684211	0.114752	60	19	6	3
	chr21	33031879	33032028	TRUE	8.68036e-25	3.35646e-26	0.820833	0.165134	53	20	5	2
	chr6	43484654	43484803	TRUE	8.93573e-25	3.45762e-26	0.804444	0.133341	48	15	6	3
	chr2	220363513	220363662	TRUE	9.03558e-25	3.50114e-26	0.810476	0.20347	57	15	7	3
	chr9	97488894	97489043	TRUE	9.03558e-25	3.50006e-26	0.834375	0.132895	55	16	6	3
	chr19	12098332	12098481	TRUE	9.14216e-25	3.54491e-26	0.810667	0.115493	52	25	4	2
	chr15	42787735	42787884	TRUE	9.20528e-25	3.57187e-26	0.894872	0.187822	48	13	5	3
	chr4	6711506	6711655	TRUE	9.37457e-25	3.64009e-26	0.736678	0.144004	96	21	9	4
	chr11	1330791	1330940	TRUE	9.42761e-25	3.66324e-26	0.882716	0.137914	43	27	2	1
	chr21	47743737	47743886	TRUE	9.84815e-25	3.82931e-26	0.691358	0.168743	63	27	4	2
	chr3	9438290	9438439	TRUE	1.04144e-24	4.0523e-26	0.866667	0.174234	46	25	3	1
	chr14	71067336	71067485	TRUE	1.0751e-24	4.18618e-26	0.578704	0.0681037	45	18	4	2
	chr3	49449478	49449627	TRUE	1.08098e-24	4.21197e-26	0.775362	0.197387	72	23	6	3
	chr2	220110124	220110273	TRUE	1.10176e-24	4.29592e-26	0.921569	0.117001	32	17	3	1
	chr11	76155969	76156118	TRUE	1.12496e-24	4.38945e-26	0.930556	0.178766	42	18	4	2
	chr2	120124404	120124553	TRUE	1.14477e-24	4.46984e-26	0.869565	0.13202	36	23	2	1
	chr22	38902297	38902446	TRUE	1.15527e-24	4.51393e-26	0.721212	0.163265	76	22	7	3
	chr3	42814697	42814846	TRUE	1.2221e-24	4.77836e-26	0.72549	0.122254	53	17	6	3
	chr12	113659169	113659318	TRUE	1.26138e-24	4.93537e-26	0.924242	0.175096	46	22	3	2
	chr19	50706785	50706934	TRUE	1.27942e-24	5.00941e-26	0.861111	0.206289	55	24	3	2
	chr1	161087818	161087967	TRUE	1.28329e-24	5.02804e-26	0.669753	0.123282	63	27	4	2
	chr16	103729	103878	TRUE	1.29139e-24	5.06325e-26	0.790323	0.186024	64	31	3	2
	chr9	19380167	19380316	TRUE	1.29157e-24	5.06743e-26	0.666667	0.112949	61	19	6	3
	chr7	26240999	26241148	TRUE	1.31245e-24	5.1529e-26	0.807313	0.340949	123	21	11	5
	chr22	42486840	42486989	TRUE	1.34921e-24	5.3009e-26	0.920139	0.23075	54	24	4	2
	chr21	38639785	38639934	TRUE	1.38273e-24	5.43632e-26	0.897727	0.17723	44	22	4	2
	chr7	112090415	112090564	TRUE	1.39033e-24	5.46997e-26	0.694331	0.144375	72	21	6	3
	chr11	66512107	66512256	TRUE	1.45465e-24	5.72694e-26	0.733974	0.162474	67	26	4	2
	chr11	4414878	4415027	TRUE	1.48792e-24	5.86194e-26	0.673942	0.103039	59	15	8	3
	chr21	30365176	30365325	TRUE	1.54465e-24	6.08961e-26	0.760714	0.136541	50	14	7	3
	chr1	78148295	78148444	TRUE	1.58798e-24	6.26472e-26	0.882051	0.132587	40	13	6	3
	chr7	150725410	150725559	TRUE	1.61691e-24	6.38323e-26	0.836364	0.12784	45	11	8	4
	chr20	48732446	48732595	TRUE	1.63618e-24	6.46371e-26	0.694274	0.201677	100	21	9	4
	chr7	75071945	75072094	TRUE	1.64237e-24	6.49262e-26	0.973333	0.143463	35	25	3	1
	chr2	190306059	190306208	TRUE	1.67422e-24	6.62304e-26	0.65873	0.114583	58	18	6	3
	chr16	19078827	19078976	TRUE	1.69309e-24	6.70226e-26	0.727273	0.106955	55	22	4	2
	chr19	13229009	13229158	TRUE	1.69543e-24	6.7161e-26	1	0.181811	34	29	1	1
	chr22	21368528	21368677	TRUE	1.70698e-24	6.76649e-26	0.755	0.138322	59	20	5	2
	chr5	162932485	162932634	TRUE	1.74778e-24	6.93293e-26	0.694231	0.166928	73	26	5	2
	chr19	13261182	13261331	TRUE	1.75604e-24	6.97044e-26	0.820635	0.204106	69	21	6	3
	chr9	33473893	33474042	TRUE	1.79109e-24	7.11441e-26	0.777778	0.0880795	32	18	3	1
	chr16	58718626	58718775	TRUE	1.79682e-24	7.14204e-26	0.828704	0.0799749	36	18	3	2
	chr8	95274509	95274658	TRUE	1.93914e-24	7.71298e-26	0.570189	0.138293	91	27	6	3
	chr2	85822737	85822886	TRUE	1.94798e-24	7.7534e-26	0.766667	0.145916	62	30	4	2
	chr2	191184511	191184660	TRUE	1.97368e-24	7.86103e-26	0.832516	0.195258	53	17	5	3
	chr12	66563759	66563908	TRUE	2.01959e-24	8.04932e-26	0.863636	0.205529	50	22	5	2
	chr7	55756946	55757095	TRUE	2.02415e-24	8.07297e-26	0.396825	0.104235	143	25	10	5
	chr17	4843270	4843419	TRUE	2.03225e-24	8.11076e-26	0.909091	0.156522	41	22	4	1
	chr21	44527640	44527789	TRUE	2.04848e-24	8.18108e-26	0.802083	0.145014	53	24	4	2
	chr14	62229067	62229216	TRUE	2.06266e-24	8.2433e-26	0.741358	0.165257	76	27	5	2
	chr4	6784359	6784508	TRUE	2.08637e-24	8.34366e-26	0.855556	0.169289	47	30	2	1
	chr5	150827063	150827212	TRUE	2.13384e-24	8.53927e-26	0.68	0.0861327	48	25	3	1
	chr4	88343635	88343784	TRUE	2.13602e-24	8.55378e-26	0.655208	0.0725847	47	16	4	2
	chr1	39491906	39492055	TRUE	2.13648e-24	8.56139e-26	0.724074	0.133476	58	18	5	3
	chr12	116971127	116971276	TRUE	2.14481e-24	8.60055e-26	0.747126	0.126179	60	29	3	2
	chr16	80574754	80574903	TRUE	2.19082e-24	8.791e-26	0.787037	0.0783163	34	18	3	1
	chr21	46359712	46359861	TRUE	2.25889e-24	9.07024e-26	0.839286	0.127219	41	14	5	2
	chr15	86126045	86126194	TRUE	2.29289e-24	9.21294e-26	0.472778	0.110221	104	30	6	3
	chr3	122512602	122512751	TRUE	2.30913e-24	9.28444e-26	0.697368	0.0902832	44	19	4	2
	chr1	53163990	53164139	TRUE	2.48981e-24	1.00176e-25	0.761905	0.12123	59	28	3	2
	chr22	18111540	18111689	TRUE	2.54124e-24	1.02314e-25	0.790043	0.121603	42	11	6	3
	chr17	4843277	4843426	TRUE	2.5469e-24	1.02611e-25	0.909091	0.157541	41	22	4	1
	chr14	31926632	31926781	TRUE	2.57668e-24	1.0388e-25	0.791201	0.226534	83	23	7	3
	chr17	26898480	26898629	TRUE	2.61539e-24	1.05512e-25	0.947368	0.112285	31	19	2	1
	chr10	53459307	53459456	TRUE	2.63663e-24	1.0644e-25	0.517544	0.0830993	62	19	6	3
	chr2	54557971	54558120	TRUE	2.66067e-24	1.07482e-25	0.880682	0.217779	65	22	6	2
	chr1	33546614	33546763	TRUE	2.7364e-24	1.10615e-25	0.650641	0.123924	69	26	5	2
	chr17	26898448	26898597	TRUE	2.74138e-24	1.10891e-25	0.944444	0.104215	30	18	1	1
	chr14	72052898	72053047	TRUE	2.77022e-24	1.12132e-25	0.536224	0.114216	105	28	7	3
	chr12	133757960	133758109	TRUE	2.77547e-24	1.1242e-25	0.507246	0.0884132	95	23	8	4
	chr9	134000881	134001030	TRUE	2.84509e-24	1.15317e-25	0.9125	0.15979	39	20	3	1
	chr2	136288758	136288907	TRUE	2.93719e-24	1.19129e-25	0.746875	0.16054	59	16	7	3
	chr20	1305954	1306103	TRUE	2.95254e-24	1.19831e-25	0.7025	0.145881	60	20	5	3
	chr19	12202978	12203127	TRUE	3.04446e-24	1.23644e-25	0.745833	0.101092	44	20	4	2
	chr14	35761474	35761623	TRUE	3.08955e-24	1.25559e-25	0.75625	0.125389	58	24	4	2
	chr10	114206656	114206805	TRUE	3.17144e-24	1.28973e-25	0.843137	0.121401	40	17	4	2
	chr1	37980316	37980465	TRUE	3.1982e-24	1.30147e-25	0.821429	0.17046	51	28	3	1
	chr1	150602050	150602199	TRUE	3.35201e-24	1.36497e-25	0.860714	0.177212	56	15	7	3
	chr1	93811326	93811475	TRUE	3.38479e-24	1.37923e-25	1	0.167153	32	20	3	1
	chr1	151227097	151227246	TRUE	3.4058e-24	1.38871e-25	0.778704	0.120155	57	18	6	3
	chr10	90967023	90967172	TRUE	3.43164e-24	1.40018e-25	0.820833	0.129996	52	20	3	2
	chr14	61190991	61191140	TRUE	3.51865e-24	1.43663e-25	0.799405	0.271316	101	28	7	3
	chr10	25305408	25305557	TRUE	3.53922e-24	1.44599e-25	0.920588	0.171646	47	17	4	2
	chr10	105992072	105992221	TRUE	3.55763e-24	1.45447e-25	0.878788	0.122867	42	22	3	1
	chr1	145470339	145470488	TRUE	3.70985e-24	1.5177e-25	0.741667	0.0933088	49	20	4	2
	chr6	19804933	19805082	TRUE	3.71595e-24	1.52263e-25	0.836667	0.164483	50	15	3	3
	chr19	11545932	11546081	TRUE	3.71595e-24	1.52321e-25	0.715625	0.121384	62	16	7	3
	chr21	40817611	40817760	TRUE	3.71595e-24	1.52154e-25	0.634524	0.174669	74	28	5	2
	chr11	67374315	67374464	TRUE	3.72357e-24	1.52734e-25	0.906863	0.200119	44	17	3	2
	chr1	179923808	179923957	TRUE	3.73144e-24	1.53157e-25	0.825397	0.150641	44	21	4	2
	chr14	65879259	65879408	TRUE	3.76531e-24	1.5465e-25	0.877451	0.279316	76	34	4	2
	chr5	74062994	74063143	TRUE	3.86778e-24	1.58963e-25	0.807843	0.138865	48	17	5	2
	chr8	117778642	117778791	TRUE	3.87348e-24	1.59302e-25	0.757895	0.126173	53	19	5	2
	chr13	46038971	46039120	TRUE	3.89254e-24	1.60191e-25	0.8625	0.10939	40	16	5	2
	chr3	47823357	47823506	TRUE	3.94388e-24	1.6241e-25	0.907407	0.249514	56	27	4	2
	chr1	174968792	174968941	TRUE	3.96142e-24	1.6324e-25	0.93	0.147571	35	10	3	3
	chr8	27468890	27469039	TRUE	3.99494e-24	1.64729e-25	0.884804	0.25478	78	34	4	2
	chr7	6487537	6487686	TRUE	4.06649e-24	1.67789e-25	0.519662	0.159029	125	31	8	4
	chr7	23571608	23571757	TRUE	4.07849e-24	1.68394e-25	0.705556	0.185614	85	24	6	3
	chr4	84376977	84377126	TRUE	4.13785e-24	1.70957e-25	0.716667	0.114757	46	16	6	2
	chr4	130014716	130014865	TRUE	4.3639e-24	1.80414e-25	0.773148	0.178411	52	18	6	2
	chr13	49684349	49684498	TRUE	4.43161e-24	1.83333e-25	0.640385	0.0837278	59	13	8	4
	chr4	15480747	15480896	TRUE	4.52925e-24	1.87495e-25	0.753333	0.0960946	43	15	5	2
	chr10	102295541	102295690	TRUE	4.72812e-24	1.95855e-25	0.771062	0.126509	46	13	7	3
	chr17	81037467	81037616	TRUE	4.75711e-24	1.97185e-25	0.966667	0.181735	39	20	3	1
	chr4	103789984	103790133	TRUE	4.78426e-24	1.98439e-25	0.912281	0.122119	34	19	2	1
	chr7	75157370	75157519	TRUE	4.83186e-24	2.00582e-25	0.626437	0.153455	73	29	5	2
	chr19	52074431	52074580	TRUE	4.83186e-24	2.00675e-25	0.66875	0.10787	53	16	6	3
	chr17	45608344	45608493	TRUE	4.90052e-24	2.03659e-25	0.926852	0.144669	41	18	3	2
	chr1	220445704	220445853	TRUE	4.99271e-24	2.07625e-25	0.777778	0.123157	40	18	3	2
	chr19	1407484	1407633	TRUE	5.16862e-24	2.1508e-25	0.934783	0.214477	43	23	4	1
	chr1	220219952	220220101	TRUE	5.17995e-24	2.15691e-25	0.722857	0.157096	72	15	9	4
	chr2	210288671	210288820	TRUE	5.21035e-24	2.17098e-25	0.912281	0.114447	33	19	3	1
	chr7	143533762	143533911	TRUE	5.32479e-24	2.2201e-25	0.955263	0.241667	52	19	5	2
	chr13	41706888	41707037	TRUE	5.34936e-24	2.23179e-25	0.913333	0.203342	49	25	3	1
	chr7	150777903	150778052	TRUE	5.44417e-24	2.27282e-25	0.747312	0.160669	64	31	3	2
	chr1	20834626	20834775	TRUE	5.6226e-24	2.34883e-25	0.717593	0.124611	42	18	4	2
	chr22	43411103	43411252	TRUE	5.70349e-24	2.38416e-25	0.958333	0.217558	46	26	3	1
	chr18	3594012	3594161	TRUE	5.70715e-24	2.38723e-25	0.66164	0.201514	111	27	8	4
	chr3	44379511	44379660	TRUE	5.71355e-24	2.39145e-25	0.590476	0.0892378	60	21	5	2
	chr12	109531197	109531346	TRUE	5.74273e-24	2.40522e-25	0.80303	0.123993	49	22	4	2
	chr8	55047681	55047830	TRUE	6.15608e-24	2.58e-25	0.648276	0.111612	66	29	4	2
	chr9	131084761	131084910	TRUE	6.45504e-24	2.70704e-25	0.51045	0.100285	71	18	8	3
	chr15	40650334	40650483	TRUE	6.6021e-24	2.7705e-25	0.815789	0.186814	53	38	2	1
	chr2	47630163	47630312	TRUE	6.61486e-24	2.77764e-25	0.699074	0.124004	54	18	5	3
	chr2	3381550	3381699	TRUE	6.66901e-24	2.80218e-25	0.806061	0.083922	36	11	3	3
	chr5	34915683	34915832	TRUE	6.74706e-24	2.8368e-25	0.806313	0.198742	67	11	7	6
	chr1	51425785	51425934	TRUE	6.79857e-24	2.86029e-25	0.881944	0.139325	44	24	3	1
	chr3	25824874	25825023	TRUE	6.81131e-24	2.86749e-25	0.845238	0.146883	47	28	3	1
	chr2	210867252	210867401	TRUE	6.87537e-24	2.89632e-25	0.823529	0.0957531	36	17	3	2
	chr14	68066969	68067118	TRUE	7.01709e-24	2.95792e-25	0.633333	0.168316	107	31	7	3
	chr21	33031765	33031914	TRUE	7.13994e-24	3.01163e-25	0.697759	0.152165	57	17	5	3
	chr3	9438294	9438443	TRUE	7.14268e-24	3.01707e-25	0.846154	0.174234	49	26	3	1
	chr5	133702717	133702866	TRUE	7.14268e-24	3.01858e-25	0.602273	0.104829	60	22	5	2
	chr17	33390711	33390860	TRUE	7.14268e-24	3.01675e-25	0.771429	0.095886	36	14	3	2
	chr11	6624864	6625013	TRUE	7.32109e-24	3.09595e-25	0.930556	0.139193	38	18	3	2
	chr7	95401802	95401951	TRUE	7.45599e-24	3.15502e-25	0.798611	0.110395	45	24	4	1
	chr11	73472153	73472302	TRUE	7.45705e-24	3.15748e-25	0.90625	0.30955	68	32	4	2
	chr1	33938132	33938281	TRUE	7.50473e-24	3.1797e-25	0.901099	0.153976	42	13	6	3
	chr4	2243812	2243961	TRUE	7.53326e-24	3.19382e-25	0.950758	0.222332	49	22	4	2
	chr17	38375474	38375623	TRUE	7.91206e-24	3.35655e-25	0.815	0.149171	51	20	5	2
	chr21	22370533	22370682	TRUE	7.95314e-24	3.37613e-25	0.666667	0.163363	66	31	3	2
	chr19	50169084	50169233	TRUE	7.98859e-24	3.39334e-25	0.801235	0.226556	84	27	6	3
	chr2	237478280	237478429	TRUE	8.00344e-24	3.40181e-25	0.768452	0.15026	53	14	7	3
	chr8	41435619	41435768	TRUE	8.11665e-24	3.45212e-25	0.909091	0.200785	46	22	3	2
	chr1	78225489	78225638	TRUE	8.16658e-24	3.47556e-25	0.863768	0.187547	61	23	4	2
	chr3	23958539	23958688	TRUE	8.24786e-24	3.51238e-25	0.791667	0.221804	69	24	5	2
	chr3	16306614	16306763	TRUE	8.3235e-24	3.54684e-25	0.698148	0.177904	65	27	4	2
	chr22	45608217	45608366	TRUE	8.70389e-24	3.71129e-25	0.732609	0.129402	63	23	5	2
	chr9	80911959	80912108	TRUE	8.74251e-24	3.73012e-25	0.898148	0.1842	46	27	3	1
	chr14	96671035	96671184	TRUE	8.91878e-24	3.80774e-25	0.627273	0.154408	66	22	3	3
	chr7	138818424	138818573	TRUE	8.92287e-24	3.81305e-25	0.597826	0.140162	101	23	8	4
	chr19	12992287	12992436	TRUE	8.92287e-24	3.81431e-25	0.765741	0.205477	68	18	7	3
	chr7	148725734	148725883	TRUE	9.27473e-24	3.96722e-25	0.855	0.224394	54	20	4	2
	chr8	13134009	13134158	TRUE	9.29549e-24	3.97862e-25	0.567708	0.0961508	77	32	4	2
	chr6	37321648	37321797	TRUE	9.9747e-24	4.27202e-25	0.921053	0.133364	35	19	2	1
	chr1	202830782	202830931	TRUE	1.02209e-23	4.38022e-25	0.887302	0.19537	54	21	4	2
	chr6	170862339	170862488	TRUE	1.02744e-23	4.40593e-25	0.847826	0.168866	50	23	4	2
	chr2	113012602	113012751	TRUE	1.05963e-23	4.54685e-25	0.650694	0.136059	69	24	6	2
	chr20	35807374	35807523	TRUE	1.10948e-23	4.76373e-25	0.93006	0.185333	46	16	5	2
	chr6	43395192	43395341	TRUE	1.16312e-23	4.99719e-25	0.652381	0.108685	62	35	3	1
	chr2	109065536	109065685	TRUE	1.16492e-23	5.00806e-25	0.840741	0.116594	44	18	4	2
	chr12	70132531	70132680	TRUE	1.16881e-23	5.02795e-25	0.97619	0.085295	25	21	2	1
	chr8	125486908	125487057	TRUE	1.18514e-23	5.10138e-25	0.925287	0.224719	49	29	3	1
	chr11	62358968	62359117	TRUE	1.21127e-23	5.21715e-25	0.760714	0.100185	48	14	6	3
	chr22	41032642	41032791	TRUE	1.2995e-23	5.60069e-25	0.977273	0.166374	34	22	2	1
	chr7	89874425	89874574	TRUE	1.30866e-23	5.64372e-25	0.427778	0.106225	129	27	9	4
	chr19	36909502	36909651	TRUE	1.32354e-23	5.71145e-25	0.853333	0.130362	46	25	3	1
	chr7	66461717	66461866	TRUE	1.33007e-23	5.74322e-25	0.8054	0.307768	102	28	7	3
	chr12	48166891	48167040	TRUE	1.34865e-23	5.83075e-25	0.953704	0.127732	32	18	2	1
	chr18	10525931	10526080	TRUE	1.34865e-23	5.82961e-25	0.895833	0.156584	42	16	3	2
	chr16	66914336	66914485	TRUE	1.35278e-23	5.85223e-25	0.791667	0.0909511	35	18	3	1
	chr2	224903945	224904094	TRUE	1.37192e-23	5.93877e-25	0.966667	0.148665	32	15	2	2
	chr20	42086418	42086567	TRUE	1.37907e-23	5.97342e-25	0.841667	0.16418	43	20	3	2
	chr2	170440750	170440899	TRUE	1.40273e-23	6.07971e-25	0.672619	0.080795	40	14	5	2
	chr11	47600532	47600681	TRUE	1.43124e-23	6.20716e-25	0.894928	0.151527	51	23	4	2
	chr12	102513821	102513970	TRUE	1.44937e-23	6.28967e-25	0.717708	0.0973509	49	16	4	3
	chr3	33701024	33701173	TRUE	1.44954e-23	6.29436e-25	0.635796	0.231663	143	29	10	4
[truncated: 35,401 more rows]

## Sheet: SuppTable7-TSS-IMR90-NDRs
All	chr	start	end	FDR<0.01	FDR	raw_p_value	GCH_methylation_in_window	GCH_methylation_in_adjacent_4kb_window	GCH_data_point_in_window	GCH_number_in_window	GCH_reads_depth_in_window	GCH_CT_reads_depth_in_window
[truncated: 13,742 more rows]

[truncated: 2 more sheets: SuppTable8-H3K4me3_NPC, SuppTable9-NPC_active_ehancers]
